# Supplementary material for: Directed evolution of a cyclodipeptide synthase with new activities via label-free mass spectrometric screening
Source: Royal Society of Chemistry journal article supplement (doi:10.1039/d2sc01637k), 2022-01-01
Supplement: d2sc01637k1.xlsx [file d2sc01637k1.xlsx]

## Sheet: Sheet1
ESI Data 1: All 108 theoretical m/z [M+H]+ values of 210 cyclodipeptides consisting of proteinogenic amino acids
MW of AA and CDPs		Gly	Ala	Ser	Thr	Cys	Val	Leu	Ile	Met	Pro	Phe	Tyr	Trp	Asp	Glu	Asn	Gln	His	Lys	Arg
		57.05	71.09	87.08	101.11	103.15	99.14	113.16	113.16	131.19	97.12	147.18	163.18	186.21	115.09	129.12	114.11	128.14	137.14	128.17	156.19
Gly	57.05	115.1	129.14	145.13	159.16	161.2	157.19	171.21	171.21	189.24	155.17	205.23	221.23	244.26	173.14	187.17	172.16	186.19	195.19	186.22	214.24
Ala	71.09		143.18	159.17	173.2	175.24	171.23	185.25	185.25	203.28	169.21	219.27	235.27	258.3	187.18	201.21	186.2	200.23	209.23	200.26	228.28
Ser	87.08			175.16	189.19	191.23	187.22	201.24	201.24	219.27	185.2	235.26	251.26	274.29	203.17	217.2	202.19	216.22	225.22	216.25	244.27
Thr	101.11				203.22	205.26	201.25	215.27	215.27	233.3	199.23	249.29	265.29	288.32	217.2	231.23	216.22	230.25	239.25	230.28	258.3
Cys	103.15					207.3	203.29	217.31	217.31	235.34	201.27	251.33	267.33	290.36	219.24	233.27	218.26	232.29	241.29	232.32	260.34
Val	99.14						199.28	213.3	213.3	231.33	197.26	247.32	263.32	286.35	215.23	229.26	214.25	228.28	237.28	228.31	256.33
Leu	113.16							227.32	227.32	245.35	211.28	261.34	277.34	300.37	229.25	243.28	228.27	242.3	251.3	242.33	270.35
Ile	113.16								227.32	245.35	211.28	261.34	277.34	300.37	229.25	243.28	228.27	242.3	251.3	242.33	270.35
Met	131.19									263.38	229.31	279.37	295.37	318.4	247.28	261.31	246.3	260.33	269.33	260.36	288.38
Pro	97.12										195.24	245.3	261.3	284.33	213.21	227.24	212.23	226.26	235.26	226.29	254.31
Phe	147.18											295.36	311.36	334.39	263.27	277.3	262.29	276.32	285.32	276.35	304.37
Tyr	163.18												327.36	350.39	279.27	293.3	278.29	292.32	301.32	292.35	320.37
Trp	186.21													373.42	302.3	316.33	301.32	315.35	324.35	315.38	343.4
Asp	115.09														231.18	245.21	230.2	244.23	253.23	244.26	272.28
Glu	129.12															259.24	244.23	258.26	267.26	258.29	286.31
Asn	114.11																229.22	243.25	252.25	243.28	271.3
Gln	128.14																	257.28	266.28	257.31	285.33
His	137.14																		275.28	266.31	294.33
Lys	128.17																			257.34	285.36
Arg	156.19																				313.38
