# Supplementary material for: Directed evolution of a cyclodipeptide synthase with new activities via label-free mass spectrometric screening
Source: Royal Society of Chemistry journal article supplement (doi:10.1039/d2sc01637k), 2022-01-01
Supplement: d2sc01637k2.xlsx [file d2sc01637k2.xlsx]

## Sheet: L33
Note: The spectra data files obtained from MALDI-Tof MS were imported into clinproTools and converted to xlsx. format. It contains 94 variants, one WT and one control harboring an empty pET28 plasmid in each site specific mutagenesis library.
Sample Name	Mean Intensity	m/z 102.17	m/z 104.15	m/z 107.09	m/z 108.11	m/z 110.11	m/z 111.10	m/z 113.13	m/z 114.11	m/z 115.13	m/z 117.18	m/z 118.14	m/z 119.13	m/z 120.11	m/z 121.09	m/z 122.12	m/z 123.09	m/z 124.11	m/z 127.11	m/z 129.10	m/z 130.10	m/z 131.10	m/z 133.13	m/z 135.12	m/z 136.11	m/z 137.11	m/z 138.12	m/z 139.09	m/z 140.11	m/z 144.10	m/z 145.09	m/z 146.10	m/z 146.73	m/z 147.10	m/z 147.77	m/z 148.11	m/z 149.12	m/z 150.13	m/z 151.15	m/z 152.10	m/z 153.10	m/z 155.12	m/z 155.61	m/z 156.12	m/z 160.12	m/z 161.12	m/z 162.11	m/z 163.11	m/z 164.12
L33-A01	453.81	0.833	0.3746	0.9101	0.357	0.3217	0.3371	0.3944	0.4011	0.3239	2.6553	0.4694	1.9744	1.3728	0.4011	0.7162	0.5641	0.3658	0.3504	0.5795	0.8506	0.4143	0.5134	3.1181	0.9343	0.7382	0.3988	0.3856	0.3878	0.9431	0.4694	19.2219	0.4429	4.4248	0.3856	1.1833	0.368	0.5068	0.3702	1.5315	0.4583	0.8308	0.3614	0.3834	0.509	0.4253	0.4561	0.476	1.4588
L33-A02	369.18	1.2839	0.6392	0.8993	0.4849	0.5797	0.4957	0.5038	0.4876	0.3765	5.2359	0.669	2.6518	2.1561	0.5959	0.7611	0.7557	0.5146	0.5092	0.6799	2.1046	0.5309	0.6934	4.0549	1.3191	1.3218	0.5417	0.4767	0.5065	1.265	0.5688	19.4646	0.4198	3.9438	0.4849	1.051	0.5499	0.5201	0.4767	2.0857	0.4388	3.4698	0.4686	0.6392	0.9995	0.6203	0.5472	0.493	1.7742
L33-A03	231.66	0.695	0.613	1.3425	0.7425	0.5784	0.6734	0.6864	0.6864	0.7554	8.2838	0.9497	1.7655	1.3295	0.6173	0.941	1.1828	0.5612	0.7252	0.7123	1.459	0.6864	0.7684	2.508	1.2346	1.6835	0.6475	0.6561	0.6302	1.7439	0.8245	40.5814	0.8374	8.0075	0.6648	1.8691	0.8115	0.7252	0.6605	4.3815	0.6734	5.3182	0.6691	0.7166	1.131	0.8029	0.8202	0.9756	3.4145
L33-A04	228.93	1.2668	0.6465	1.1663	0.712	0.6246	0.664	0.6509	0.6858	0.664	3.9969	0.747	2.4898	0.7775	0.664	0.8605	1.2275	0.6203	0.6378	0.8824	1.4284	0.7513	0.8212	3.9794	1.1576	1.5114	0.6334	0.5679	0.712	1.6162	0.795	26.3662	0.7251	5.7878	0.6989	1.6643	0.7033	0.8037	0.6509	2.1884	0.5984	4.4555	0.6115	0.8343	1.0178	0.7557	0.7819	0.747	2.4942
L33-A05	241.95	0.6572	0.7233	1.1697	0.6654	0.5828	0.5745	0.5828	0.5745	0.6778	4.5299	0.744	1.5954	1.4548	0.6944	0.9837	1.0829	0.6406	0.6241	0.682	1.2399	0.6778	0.6572	2.6617	1.0167	1.2937	0.6034	0.7564	0.6696	1.3267	0.7357	28.105	0.7357	5.7739	0.6406	1.43	0.62	0.6448	0.7274	2.2319	0.6572	4.1579	0.5166	0.7688	0.9051	0.6572	0.8101	0.7688	2.4468
L33-A06	344.87	0.6582	0.4494	0.7829	0.4523	0.432	0.4784	0.461	0.4291	0.4494	1.9689	0.5364	1.8587	0.7452	0.4407	0.5973	0.6205	0.4668	0.5915	0.6002	0.9105	0.5045	0.5422	2.7952	0.8699	1.1773	0.4755	0.3886	0.5509	1.0526	0.5103	16.4351	0.5364	3.6651	0.4523	1.1483	0.5103	0.5799	0.5132	2.0674	0.4842	1.6412	0.461	0.4929	0.6263	0.4639	0.5654	0.548	1.6702
L33-A07	326.95	0.7524	0.468	1.1592	0.5322	0.4527	0.4037	0.4833	0.4282	0.419	3.6092	0.6974	1.7587	1.4131	0.4741	1.3733	1.1409	0.4924	0.5689	0.575	1.3733	0.52	0.6331	2.7466	1.0369	1.0919	0.5138	0.5077	0.6912	1.4712	0.6209	36.8716	0.5873	7.7169	0.5353	2.0064	0.5658	0.5475	0.5383	2.1808	0.4986	3.6856	0.4955	0.5964	0.8075	0.5353	0.7218	0.7861	2.5998
L33-A08	378.84	0.7022	0.5438	0.7919	0.4487	0.4514	0.3933	0.5174	0.4012	0.3801	3.4791	0.5992	1.2987	1.3515	0.4751	0.7101	0.6863	0.3933	0.3643	0.5042	0.9556	0.4382	0.5227	2.1777	0.7787	0.8737	0.4408	0.3537	0.4461	1.0717	0.5042	16.6404	0.3564	3.6348	0.3986	0.9872	0.4751	0.491	0.4804	1.4545	0.4355	1.7316	0.3959	0.4091	0.6467	0.4118	0.4382	0.4883	1.4782
L33-A09	369.59	0.6683	0.4654	0.7765	0.5222	0.4573	0.4518	0.4546	0.4627	0.4275	1.8832	0.487	1.9833	0.7468	0.4113	0.6629	0.7251	0.4383	0.4194	0.5601	0.8469	0.4329	0.5925	2.8978	0.7846	1.0363	0.5384	0.4897	0.3842	1.1337	0.6142	18.0496	0.4924	3.8989	0.5141	1.2121	0.5222	0.5844	0.4708	1.4286	0.441	1.4854	0.4221	0.4491	0.6088	0.4518	0.46	0.5952	1.6451
L33-A10	242.72	0.7169	0.5562	1.3596	0.6098	0.5521	0.618	0.6345	0.548	0.5686	3.8811	0.618	2.0147	1.2813	0.6304	1.0877	1.4832	0.6304	0.6345	0.7004	1.475	0.6922	0.7622	3.0118	1.6851	1.3802	0.6633	0.688	0.7334	1.6933	0.8075	37.0475	0.754	7.8569	0.6963	1.9199	0.8199	0.6674	0.721	2.8676	0.6468	3.877	0.6592	0.7128	1.0712	0.754	1.03	0.9517	2.9458
L33-A11	483.06	0.7535	0.3147	0.6645	0.3271	0.3436	0.325	0.3975	0.3416	0.2753	2.5256	0.4264	1.3435	0.5527	0.3292	0.5155	0.6045	0.3126	0.3126	0.4389	0.8467	0.3436	0.4616	2.2005	0.9129	0.8984	0.3768	0.3271	0.3519	1.004	0.5134	19.6704	0.472	4.2727	0.3519	1.0992	0.4368	0.5072	0.3871	1.445	0.4161	1.5981	0.3664	0.3954	0.7038	0.443	0.4223	0.5217	1.683
L33-A12	337.55	0.7969	0.3585	0.637	0.4562	0.4918	0.5125	0.6103	0.4888	0.5096	2.8826	0.5244	1.662	0.791	0.4473	0.791	0.6903	0.477	0.5096	0.6044	1.2798	0.4799	0.6014	2.6693	0.8473	0.9243	0.4414	0.4888	0.5303	0.9984	0.6281	12.8101	0.4562	2.8618	0.471	0.9806	0.5984	0.5688	0.4651	1.0399	0.4325	1.8872	0.4473	0.5866	0.6014	0.5273	0.5096	0.5155	1.2769
L33-B01	267.08	0.9548	0.9061	1.1233	0.5429	0.5766	0.5092	0.5279	0.5467	0.5017	3.1826	0.5654	2.2428	0.8986	0.5392	0.7189	1.0184	0.5841	0.5579	0.6814	1.1158	0.5841	0.674	3.2687	1.1869	1.2244	0.5953	0.5953	0.7189	1.2843	0.7526	29.9649	0.659	6.163	0.5766	1.5127	0.6253	0.6253	0.6365	2.5049	0.6328	3.5682	0.5729	0.7264	0.8649	0.6665	0.7077	0.7713	2.8007
L33-B02	225.95	0.6639	0.5931	1.3499	0.6019	0.6639	0.6196	0.5665	0.6462	0.6727	3.2397	0.5931	2.5493	0.9604	0.6329	0.9294	1.4517	0.5975	0.6373	0.748	1.3986	0.8099	0.7347	3.7885	1.3853	1.1773	0.624	0.717	0.6373	1.58	0.956	38.6066	0.6285	8.1922	0.7214	1.9739	0.748	0.894	0.6462	3.7398	0.8498	3.9213	0.7081	0.9339	0.8852	0.6595	0.7745	0.8807	3.0583
L33-B03	463.28	0.5979	0.4036	0.7576	0.4403	0.341	0.3648	0.3864	0.3432	0.2741	3.4321	0.4554	2.1369	0.6324	0.3281	0.7209	0.6497	0.3583	0.3216	0.5202	0.8461	0.341	0.5267	3.2745	1.0642	1.0404	0.3885	0.2936	0.3864	1.2347	0.477	21.6241	0.4015	4.5221	0.3929	1.2196	0.477	0.4857	0.4447	2.2017	0.3907	1.5757	0.3777	0.4036	0.5547	0.3691	0.449	0.4727	1.9038
L33-B04	385.37	0.4853	0.4878	0.9679	0.4567	0.3425	0.3659	0.3892	0.4489	0.4048	3.3163	0.4827	1.8009	0.6487	0.3737	0.7889	1.1651	0.4593	0.4126	0.5216	1.0769	0.4645	0.5034	2.7844	0.942	1.1833	0.3789	0.3607	0.4334	1.1366	0.6254	31.8061	0.5683	6.6301	0.4411	1.6426	0.6176	0.5968	0.4567	2.8337	0.519	4.1571	0.4827	0.6202	0.615	0.4515	0.6098	0.7344	2.7558
L33-B05	357.32	0.792	0.5345	0.7808	0.4338	0.4114	0.487	0.4422	0.4478	0.473	2.6922	0.6017	1.7827	2.4432	0.5625	0.6689	0.6297	0.4926	0.4254	0.5261	3.7949	0.6717	0.487	2.8574	1.2678	0.9543	0.5037	0.4282	0.4506	1.2258	0.5793	15.2663	0.5905	3.2548	0.4758	0.9571	0.5653	0.4422	0.5093	1.1614	0.445	2.3592	0.5149	0.5485	0.7584	0.5345	0.5093	0.5429	1.2342
L33-B06	311.1	1.9126	0.5754	0.8422	0.5625	0.5079	0.4532	0.5786	0.6268	0.5014	7.406	0.7297	0.5979	0.5657	0.4468	0.72	0.9065	0.4918	0.5014	0.4918	0.974	0.5464	0.5175	0.9257	1.0157	1.1154	0.5497	0.5239	0.6493	1.2343	0.5368	18.1806	0.4597	3.6515	0.4757	1.1508	0.6172	0.5625	0.5593	1.8579	0.5722	3.2337	0.4982	0.5979	0.675	0.5272	0.5593	0.7136	1.964
L33-B07	413.52	0.6433	0.3676	0.8125	0.3869	0.3386	0.3821	0.4184	0.3482	0.3095	2.5633	0.3869	1.4292	0.6505	0.324	0.6795	0.6312	0.3603	0.4957	0.4788	0.9431	0.3772	0.4401	2.3118	0.8609	0.9214	0.3821	0.2805	0.3893	1.0471	0.5272	20.8428	0.4135	4.3867	0.3869	1.3228	0.4788	0.5006	0.3821	1.8161	0.4184	1.5549	0.4111	0.4184	0.4691	0.3942	0.4401	0.5755	1.6734
L33-B08	255.84	0.5902	0.512	1.3719	0.5824	0.5433	0.5199	0.6606	0.5238	0.5472	3.1504	0.5628	1.3641	1.286	0.5511	0.985	1.0475	0.6215	0.6058	0.5316	2.1654	0.6567	0.5707	1.8136	1.1531	1.1843	0.6684	0.5902	0.6215	1.4384	0.77	36.292	0.7935	7.231	0.6762	1.8918	0.6254	0.6254	0.598	2.6618	0.5746	4.5145	0.5902	0.6176	1.0045	0.6606	0.7817	0.7426	2.5836
L33-B09	290.42	0.5991	8.5496	0.8884	0.4993	0.4648	0.5303	0.4889	0.4993	0.575	1.0674	0.5613	1.4599	1.0881	0.6267	0.8608	0.7747	0.4924	0.5337	0.6611	1.9592	0.6336	0.6577	1.8594	0.9228	0.8918	2.548	2.1727	0.6404	1.0605	0.6508	19.4785	0.6336	3.946	0.5647	1.1914	0.5578	0.7059	0.6645	1.4737	0.6026	1.3876	0.5406	0.7265	0.8987	0.5785	0.6749	0.7128	1.4531
L33-B10	365.04	1.0739	0.4712	0.9232	0.5068	0.4356	0.3972	0.4657	0.4739	0.4082	3.6325	0.5232	1.5396	1.1067	0.4219	0.8027	0.7177	0.4684	0.463	0.5342	1.115	0.4958	0.4904	2.3641	0.904	0.9232	0.4411	0.4383	0.4712	1.1752	0.5506	22.6552	0.4411	4.857	0.4	1.2218	0.4657	0.4712	0.4383	1.5067	0.4246	2.1505	0.4602	0.4931	0.6684	0.4876	0.5342	0.6164	1.7395
L33-B11	222.54	1.0245	0.9886	1.2088	0.7819	0.6561	0.6561	0.6021	0.6336	0.8268	7.2078	0.8089	2.3996	1.2178	0.7729	0.9482	1.0605	0.5932	0.7549	0.7235	1.2807	0.6651	0.7459	3.5949	1.2762	1.3526	0.8178	0.6696	0.6785	1.5099	0.7909	29.3838	0.7594	6.0619	0.719	1.6941	0.6561	0.8044	0.7864	3.0152	0.6516	3.3163	0.701	0.6516	0.9482	0.8044	0.8268	0.7055	2.7321
L33-B12	384.36	0.5073	0.5906	0.8326	0.4501	0.3512	0.3929	0.3877	0.3825	0.3382	1.6625	0.4943	1.4231	0.96	0.4189	0.7389	0.6218	0.4059	0.5724	0.5203	1.3399	0.4839	0.4579	2.0163	0.7285	0.7207	0.4423	0.4631	0.5021	0.8326	0.4891	17.1583	0.4917	3.6658	0.4839	1.0277	0.4865	0.4683	0.3851	1.2384	0.4085	0.9366	0.4553	0.4579	0.5203	0.4059	0.4215	0.4579	1.4596
L33-C01	258.64	0.4756	0.6186	1.1908	0.6341	0.464	0.5181	0.5799	0.5104	0.5181	2.834	0.5954	1.2063	1.2759	0.5451	0.9666	1.2179	0.6611	0.607	0.5645	1.3996	0.7269	0.5915	1.8674	1.1444	1.4189	0.6766	0.6225	0.6147	1.7282	0.8467	36.7338	0.7617	7.5316	0.6573	1.9177	0.7075	0.6766	0.7423	2.8185	0.7269	5.1229	0.6921	0.7926	0.9704	0.7849	0.7965	0.8815	2.8572
L33-C02	388.73	0.8283	0.584	0.9235	0.4502	0.3782	0.373	0.4579	0.3936	0.3704	4.1854	0.584	1.8342	1.4226	0.391	0.692	0.6508	0.4142	0.4759	0.5248	1.3017	0.4039	0.5016	2.9558	1.0213	0.8438	0.4116	0.4373	0.4939	1.1885	0.5608	19.2086	0.4528	4.0028	0.4245	1.047	0.4708	0.4836	0.3756	1.5872	0.4065	1.7673	0.4399	0.4193	0.6688	0.4373	0.4939	0.5428	1.4817
L33-C03	434.83	0.8509	0.4255	0.729	0.3657	0.3519	0.3887	0.4232	0.3082	0.3197	2.9299	0.4622	1.5822	0.6485	0.3818	0.6669	0.6255	0.3887	0.3358	0.499	1.0303	0.4324	0.4898	2.9023	0.867	0.8877	0.414	0.3266	0.5358	1.1752	0.5266	19.0649	0.4508	4.0407	0.4416	1.1039	0.4622	0.5358	0.4278	1.5063	0.4002	2.0054	0.4485	0.3818	0.5726	0.4645	0.4186	0.522	1.5707
L33-C04	458.83	0.4032	0.3444	0.741	0.34	0.3008	0.3182	0.3749	0.3073	0.3095	1.5321	0.3465	1.1638	0.5688	0.3117	0.5797	0.5841	0.3356	0.3335	0.401	0.571	0.377	0.4097	1.7196	0.6778	0.6713	0.3727	0.3117	0.4272	0.8086	0.4315	20.2274	0.4446	4.3088	0.3836	1.2292	0.4076	0.4599	0.3618	1.2357	0.3335	0.8892	0.4991	0.3988	0.4032	0.3073	0.3879	0.4773	1.4101
L33-C05	268.78	0.7925	0.9822	1.0306	0.6176	0.6027	0.5692	0.7627	0.6883	0.7106	4.3046	0.7962	2.6527	2.4071	0.7701	1.1124	0.9785	0.5878	0.6474	0.6585	2.7011	0.7627	0.6325	3.4526	1.358	1.2724	0.5953	0.5767	0.6585	1.3319	0.6362	24.4137	0.5804	4.9705	0.5692	1.3133	0.6511	0.6325	0.7441	2.3178	0.5878	2.7122	0.5097	0.6511	0.9524	0.625	0.6883	0.6808	1.9718
L33-C06	305.43	0.681	0.7498	0.9593	0.5959	0.478	0.4846	0.5009	0.4813	0.4387	4.001	0.6614	1.2736	1.2049	0.6123	0.7858	0.8742	0.537	0.5762	0.5762	0.884	0.4911	0.5239	1.9023	0.7825	0.8251	0.5533	0.4518	0.6254	1.0444	0.5861	23.3281	0.6286	4.8228	0.4944	1.3686	0.5893	0.5828	0.6221	2.2755	0.5337	1.9808	0.537	0.5108	0.6188	0.4715	0.5435	0.6712	2.0365
L33-C07	322.41	0.7134	0.5831	0.9026	0.4901	0.4901	0.4435	0.487	0.4063	0.4497	3.5421	0.6948	1.1817	1.1166	0.4653	0.7072	0.8095	0.4528	0.518	0.4559	2.0192	0.5645	0.6172	1.9137	1.1848	0.8871	0.5614	0.4342	0.6141	0.9863	0.5304	16.6374	0.5459	3.263	0.4404	0.9615	0.5645	0.4715	0.4746	1.2252	0.5118	2.2487	0.487	0.5521	0.6576	0.4994	0.518	0.5583	1.3709
L33-C08	294.94	0.8646	0.8002	0.9121	0.5425	0.5357	0.5221	0.5832	0.6103	0.5018	3.9907	0.6645	1.7631	2.3971	0.712	0.8103	0.7222	0.5527	0.5696	0.6645	3.7228	0.7832	0.5594	2.6887	1.0612	1.0138	0.6476	0.4848	0.5866	1.0884	0.6612	17.0544	0.4984	3.5567	0.5425	1.0918	0.6408	0.5154	0.4916	1.1053	0.5662	2.4039	0.5018	0.5967	0.8239	0.7154	0.6679	0.6476	1.3291
L33-C09	211.02	0.6729	0.744	1.5496	0.872	0.7582	0.6919	0.7061	0.635	0.763	2.3221	0.6682	2.3742	1.9809	0.654	1.0473	0.962	0.6398	0.7014	0.7251	3.2225	0.8056	0.7393	3.2035	1.5354	1.3364	0.7156	0.6777	0.8957	1.7771	0.9099	34.2248	0.7582	6.7625	0.744	1.9288	0.8246	0.7488	0.6682	3.4215	0.6682	4.8906	0.7061	0.8625	1.379	0.9051	1.0426	0.9099	2.7391
L33-C10	371.91	0.4813	0.449	0.8416	0.4463	0.3764	0.3926	0.406	0.4383	0.4087	1.5353	0.3845	1.2906	0.8577	0.4517	0.648	0.5673	0.4141	0.3254	0.4786	1.0594	0.4195	0.4732	1.9333	0.769	0.8201	0.441	0.4033	0.4813	0.8147	0.4759	17.5206	0.4921	3.7267	0.4571	1.132	0.4679	0.5458	0.4813	1.1428	0.3845	0.8846	0.3899	0.3953	0.4732	0.4463	0.4705	0.4679	1.3068
L33-C11	290.7	0.7018	0.891	0.9219	0.5538	0.4403	0.4954	0.5401	0.4506	0.5091	4.0523	0.6467	2.3667	0.7809	0.4334	0.9529	0.9907	0.4988	0.5263	0.6089	1.2797	0.5332	0.7568	3.3609	1.0458	1.2246	0.7293	0.5573	0.5848	1.2969	0.7362	28.2424	0.657	5.965	0.6089	1.4964	0.6158	0.6536	0.5814	1.8438	0.5676	2.6075	0.4644	0.6123	0.688	0.547	0.6295	0.7465	2.2291
L33-C12	380.38	0.5389	0.3759	0.7545	0.468	0.3865	0.3786	0.4259	0.4417	0.4285	1.7509	0.5416	1.2277	0.6257	0.4154	0.7125	0.7466	0.4338	0.3943	0.4417	0.6704	0.3917	0.4443	1.8561	0.6993	0.6336	0.4101	0.5311	0.4653	0.8229	0.4443	17.2093	0.4811	3.7542	0.4574	0.978	0.4285	0.4653	0.4443	1.0227	0.4101	0.9832	0.4312	0.4469	0.4942	0.4574	0.4075	0.5731	1.3382
L33-D01	396.79	0.6527	0.5469	0.7611	0.4486	0.3957	0.4738	0.4637	0.4058	0.4007	2.4698	0.4788	1.5247	2.2858	0.5141	0.6124	0.5696	0.4385	0.4587	0.5469	1.0711	0.4436	0.4839	2.4018	0.9526	0.9148	0.4612	0.431	0.5116	0.9804	0.4234	13.9065	0.4209	3.0671	0.4713	0.9854	0.5721	0.4965	0.5091	1.1039	0.4108	1.8776	0.4209	0.441	0.5948	0.4662	0.4788	0.5192	1.1694
L33-D02	214.54	0.9276	0.8576	0.9369	0.6432	0.6852	0.7411	0.7038	0.6432	0.7551	3.3234	0.7737	3.0204	2.2327	0.6339	0.8949	0.7691	0.6572	0.592	0.881	3.8594	0.8623	0.8343	4.6471	1.5382	1.403	0.7504	0.6293	0.7644	1.3704	0.7598	20.3644	0.6665	4.0645	0.7038	1.2399	0.7504	0.6526	0.8157	1.981	0.5966	3.2255	0.6712	0.6992	1.2538	0.8576	0.811	0.6852	1.6594
L33-D03	293.25	0.4433	4.6684	0.7877	0.5183	0.4194	0.4297	0.5149	0.7605	0.5013	0.7946	2.0529	1.3947	0.948	0.532	0.8628	0.665	0.4604	0.5388	0.6684	0.9958	0.5149	0.6411	1.7051	0.7946	0.8014	0.7468	0.5354	1.5516	1.2208	0.7536	15.4478	0.607	3.4647	0.5968	1.0333	0.5627	0.5729	0.5763	1.7733	0.5797	1.6505	0.549	0.8832	0.7639	0.5422	0.6888	0.5899	1.405
L33-D04	353.39	0.7272	0.4952	0.747	0.4386	0.4273	0.4329	0.4471	0.4131	0.3735	6.0018	0.6763	1.2253	1.4064	0.5263	0.6452	0.6848	0.498	0.3933	0.549	1.1517	0.4641	0.5631	1.9072	0.9112	0.8517	0.5461	0.3962	0.5433	0.9876	0.4867	14.7966	0.4811	3.3023	0.4047	1.0894	0.5518	0.4641	0.4895	1.0583	0.4612	1.6299	0.4499	0.4839	0.6169	0.498	0.5122	0.515	1.2253
L33-D05	327.74	0.8727	0.8086	1.0008	0.534	0.4851	0.4363	0.5248	0.4455	0.5157	6.8531	0.7964	1.0923	1.0222	0.4638	0.8727	0.894	0.4668	0.537	0.4943	1.6873	0.5492	0.4882	1.6629	0.9642	0.8635	0.4668	0.4241	0.6255	1.1869	0.6591	22.8964	0.5675	4.7294	0.5187	1.2113	0.5584	0.5248	0.5706	1.5531	0.476	2.1206	0.5126	0.6316	0.7781	0.5462	0.5553	0.5523	1.7423
L33-D06	326.54	0.784	0.6768	0.9157	0.4808	0.4747	0.3859	0.3675	0.441	0.4502	5.3562	0.6033	1.0167	0.7166	0.4563	0.7993	0.9463	0.5727	0.4777	0.5022	0.9432	0.4196	0.4624	1.5863	0.8697	0.8575	0.4992	0.4716	0.5574	1.2525	0.7074	27.1514	0.5022	5.8462	0.5022	1.5404	0.6094	0.5819	0.4686	1.9201	0.588	1.8283	0.542	0.4441	0.6186	0.49	0.6125	0.6492	2.1468
L33-D07	288.92	0.7268	0.9518	1.2322	0.5711	0.5226	0.5642	0.5572	0.4846	0.5884	5.6555	0.6992	1.5541	1.3533	0.443	0.9726	0.9276	0.4569	0.6645	0.5884	2.0975	0.5988	0.5988	2.3294	1.246	1.1387	0.5607	0.4534	0.7026	1.2806	0.6957	24.5674	0.5572	4.6414	0.5849	1.3014	0.6715	0.5399	0.4673	2.2671	0.6057	2.6616	0.5746	0.578	0.8584	0.533	0.5676	0.6161	2.0905
L33-D08	340.45	0.7343	0.6286	0.843	0.5434	0.5111	0.4465	0.5552	0.3965	0.42	4.3003	0.5845	2.1883	0.8489	0.4494	0.7255	1.1309	0.467	0.4729	0.6638	1.313	0.4729	0.5023	3.5571	1.1015	1.2249	0.5552	0.423	0.6257	1.4481	0.6168	24.6031	0.4289	5.3871	0.4112	1.2748	0.5287	0.4993	0.5552	2.8022	0.4847	4.5382	0.4318	0.6168	0.7901	0.4935	0.6168	0.6168	2.4909
L33-D09	254.05	0.5865	0.7046	1.1927	0.6455	0.5786	0.6101	0.5904	0.5786	0.5983	2.5074	0.6534	1.4603	1.047	0.6298	0.8384	1.3186	0.6022	0.7321	0.6573	1.0903	0.6219	0.5668	2.161	0.9329	1.0037	0.5511	0.5196	0.6298	1.1612	0.7636	35.2683	0.681	7.1639	0.6692	1.9957	0.5944	0.6022	0.7361	2.2476	0.5944	3.6252	0.8148	0.6573	0.7951	0.6062	0.681	0.7872	2.6215
L33-D10	249.89	0.7443	0.9644	1.1765	0.6523	0.5362	0.6643	0.5762	0.5482	0.5442	4.1738	0.6563	2.261	0.8324	0.6723	1.0725	1.3446	0.6003	0.7043	0.6563	1.5767	0.7803	0.7963	3.4215	1.5127	2.0009	0.6603	0.5282	0.6803	1.5086	0.7763	30.7732	0.6163	6.6749	0.6003	1.6487	0.8204	0.7763	0.7363	3.6776	0.6883	6.0706	0.6043	0.9284	1.1685	0.7083	0.8324	0.9604	3.1654
L33-D11	351.01	0.5356	0.5071	0.7094	0.5983	0.453	0.4587	0.6182	0.4701	0.5128	2.1766	0.5014	0.9943	0.8062	0.4302	0.6268	0.6923	0.4302	0.4444	0.4444	0.8176	0.5043	0.5384	1.5413	0.849	0.8347	0.4758	0.4216	0.5584	1.0085	0.4872	13.5778	0.4245	2.9572	0.4473	0.8689	0.4644	0.5669	0.5156	0.9401	0.4729	1.3874	0.4159	0.4815	0.5726	0.4074	0.4786	0.5555	1.2421
L33-D12	206.57	1.3458	0.9004	1.1038	0.7552	0.6826	0.6439	0.7116	0.6245	0.6439	10.2001	0.973	1.7137	1.2393	0.6197	1.3458	1.0844	0.76	0.6342	0.7746	1.1376	0.7552	0.823	2.314	1.2006	0.9779	0.7213	0.6777	0.6923	1.3168	0.7939	31.8879	0.8036	6.7242	0.7068	1.7282	0.7697	0.731	0.6293	1.5637	0.7794	2.2317	0.6584	0.8665	1.0892	0.7794	0.7939	0.9392	2.5948
L33-E01	414.7	0.4847	0.4365	0.8995	0.4365	0.3448	0.4051	0.4172	0.3424	0.3135	2.0111	0.4533	2.0642	0.762	0.3762	0.7234	0.7475	0.3931	0.3738	0.5426	0.9597	0.3858	0.6752	3.4869	0.885	1.0152	0.4268	0.3689	0.422	1.2178	0.5691	23.4749	0.4172	4.9699	0.516	1.3624	0.4509	0.5643	0.4533	1.9822	0.4485	1.6132	0.3931	0.4244	0.5667	0.4702	0.4316	0.4992	1.9122
L33-E02	474.64	0.3877	0.3813	0.8996	0.3497	0.3202	0.3371	0.3603	0.3245	0.2992	1.8245	0.4509	1.7908	0.809	0.3392	0.691	0.6152	0.3245	0.3708	0.4846	0.6615	0.3392	0.5941	2.8021	0.6742	0.7943	0.3877	0.4087	0.3982	1.0913	0.512	22.065	0.5351	4.812	0.4677	1.1798	0.4235	0.5183	0.3898	1.4874	0.3181	1.0618	0.3561	0.3223	0.4087	0.3476	0.3877	0.4972	1.5085
L33-E03	431.76	0.579	0.4285	0.8963	0.3521	0.3312	0.2965	0.359	0.2988	0.3497	3.2634	0.5721	1.0098	0.5327	0.3914	0.7759	0.806	0.4354	0.4007	0.4192	0.579	0.3544	0.3822	1.5495	0.5327	0.6277	0.41	0.3474	0.4169	1.0399	0.5095	23.4855	0.4655	5.1881	0.498	1.3063	0.447	0.498	0.3706	1.1905	0.3243	0.9913	0.403	0.3289	0.4285	0.3289	0.3984	0.454	1.7093
L33-E04	436.82	0.5563	0.4281	0.8905	0.4006	0.3068	0.4029	0.3526	0.3411	0.364	2.5228	0.4533	1.1332	0.9157	0.3594	0.744	0.7784	0.3571	0.3571	0.4121	1.0096	0.4006	0.4052	1.6895	0.7074	0.6753	0.3892	0.3503	0.3777	1.0554	0.5403	24.5802	0.451	5.1715	0.4441	1.3919	0.5128	0.5311	0.3686	1.3163	0.3319	1.2477	0.4052	0.4029	0.5517	0.3571	0.3686	0.5151	1.5476
L33-E05	320.95	0.5203	0.7384	0.9877	0.4455	0.3832	0.4455	0.4954	0.4362	0.4767	3.421	0.5671	1.2619	0.6263	0.4549	0.7571	1.1746	0.5047	0.5452	0.4923	0.7945	0.5515	0.4954	1.885	0.7696	0.7291	0.5671	0.458	0.5795	0.916	0.6044	29.5213	0.5484	6.1473	0.4954	1.7168	0.5421	0.5203	0.4736	1.0936	0.4144	2.4739	0.539	0.5328	0.6356	0.5016	0.5515	0.6231	2.1997
L33-E06	405.28	0.5848	0.4022	0.8241	0.3948	0.3134	0.3726	0.4343	0.3504	0.3331	2.6303	0.4466	1.0363	0.4565	0.3997	0.6909	0.7772	0.4145	0.3676	0.4466	0.6613	0.4219	0.4491	1.3941	0.7797	0.8661	0.4121	0.6045	0.4441	0.9722	0.5601	20.4254	0.4367	4.2736	0.4589	1.2189	0.5552	0.5379	0.3923	0.9031	0.4614	1.0511	0.4441	0.491	0.454	0.3627	0.3948	0.565	1.6729
L33-E07	447.04	0.6152	0.3199	0.6778	0.3713	0.3311	0.4317	0.4496	0.3154	0.34	2.4919	0.434	0.4944	0.3534	0.3982	0.6241	0.68	0.4273	0.3445	0.3758	0.5749	0.3534	0.3333	0.6778	0.595	0.6398	0.3445	0.3355	0.3959	0.8657	0.472	18.6201	0.4183	3.8587	0.3601	0.9932	0.434	0.4966	0.3624	0.9596	0.3132	1.3846	0.4228	0.4049	0.4563	0.3311	0.4407	0.5257	1.2996
L33-E08	407.77	0.5616	0.4708	0.77	0.488	0.3948	0.3924	0.4144	0.4586	0.358	2.6191	0.4905	0.9343	0.4022	0.412	0.7897	0.7087	0.3654	0.3335	0.4243	0.6302	0.3458	0.4708	1.3929	0.6033	0.6965	0.4243	0.4488	0.4831	0.9221	0.5371	18.8584	0.4708	4.0831	0.3703	1.0324	0.3948	0.4586	0.3629	1.0594	0.358	1.3758	0.461	0.4267	0.5689	0.3654	0.4316	0.5052	1.3316
L33-E09	399.85	0.5952	0.4802	0.7728	0.4802	0.3776	0.4027	0.4177	0.3676	0.3301	2.8636	0.4677	0.4977	0.5652	0.3651	0.6778	0.6402	0.3551	0.4077	0.3301	0.6627	0.3601	0.4377	0.5577	0.5177	0.6602	0.4827	0.3476	0.4277	0.7953	0.5477	17.1639	0.4377	3.5038	0.3976	0.9954	0.4527	0.4602	0.3776	1.1279	0.3801	1.413	0.4177	0.4377	0.4627	0.3601	0.4602	0.5002	1.5406
L33-E10	352.04	0.6562	0.7584	0.9743	0.5454	0.446	0.3948	0.571	0.4062	0.4744	5.0534	0.7073	1.1675	0.5937	0.4659	0.8323	0.9289	0.6505	0.5056	0.6533	0.9033	0.4545	2.2355	1.6447	0.926	0.9488	0.5113	0.9062	0.6903	1.0595	0.6533	21.2448	0.446	4.3063	0.4346	1.2186	0.5994	0.571	0.4403	1.8435	0.4715	1.4033	0.4289	0.4857	0.6221	0.4545	0.5113	0.6448	1.8606
L33-E11	334.73	0.6543	0.4661	0.8933	0.4362	0.4541	0.4302	0.4661	0.4272	0.4033	2.9636	0.5617	1.4758	0.8813	0.49	0.8066	0.6812	0.472	0.475	0.5168	0.947	0.5766	0.6274	2.2347	0.7827	1.0247	0.49	0.4511	0.4959	1.0158	0.5348	22.7767	0.5826	4.8995	0.4929	1.446	0.5497	0.5766	0.4571	1.6969	0.4481	1.2458	0.484	0.5049	0.7349	0.4661	0.4631	0.5736	1.9867
L33-E12	283.68	0.5534	0.7121	0.9835	0.5393	0.5182	0.6345	0.5288	0.5499	0.4653	3.1621	0.6663	2.45	1.0611	0.5147	0.9306	0.8883	0.5922	0.6592	0.6663	1.8683	0.5958	0.7262	4.5192	1.6075	1.8084	0.5993	0.4935	0.6275	1.685	0.8284	28.3035	0.5675	5.8482	0.5252	1.5828	0.497	0.7086	0.7332	1.8366	0.6381	2.4747	0.5358	0.5499	1.1527	0.6063	0.8073	0.7368	3.0916
L33-F01	394.9	0.4659	0.8635	1.1497	0.5672	0.3469	0.4178	0.3798	0.4533	0.3773	2.0613	0.7825	2.1525	2.0461	0.5444	24.2189	1.5776	0.5115	0.6179	0.5318	1.6257	0.4837	0.5394	3.4009	1.218	0.9775	0.5394	0.9142	0.8407	1.7929	0.6761	31.869	0.5444	6.5916	0.428	1.3852	0.4735	0.509	0.4583	3.9479	0.6305	3.1831	0.4153	0.6407	0.8382	0.5546	0.6128	0.5546	2.5931
L33-F02	496.61	0.592	0.3705	0.6182	0.3584	0.2819	0.3504	0.3383	0.3262	0.2638	2.1063	0.4309	2.1022	0.8216	0.4188	0.9263	0.6041	0.3222	0.3242	0.5296	0.9303	0.3766	0.5578	3.7977	0.9323	1.2565	0.4792	0.3766	0.4168	1.2746	0.443	18.9081	0.3806	4.0877	0.3766	1.0088	0.441	0.4853	0.3967	2.7124	0.4068	1.8425	0.3544	0.4571	0.6967	0.4269	0.445	0.4792	1.8505
L33-F03	253.44	0.876	0.8089	1.0338	0.6471	0.5366	0.5524	0.6155	0.58	0.5248	3.851	0.8365	2.1504	0.8444	0.58	1.0219	1.164	0.6471	0.5485	0.6589	1.1837	0.58	0.6471	3.0737	1.1088	1.0417	0.5761	0.6037	0.6116	1.4836	0.6195	26.1997	0.5524	5.6582	0.5129	1.4323	0.6668	0.6866	0.6432	1.7874	0.6076	2.4977	0.5603	0.7063	0.9194	0.655	0.6589	0.7497	2.2688
L33-F04	429.57	0.554	0.4376	0.7705	0.4027	0.3911	0.3981	0.3864	0.3934	0.3282	2.0043	0.4446	1.6994	0.5354	0.3143	4.2903	0.7752	0.3981	0.3981	0.554	0.9242	0.4446	0.5261	2.9122	0.7892	1.2594	0.4958	0.4144	0.4446	1.1965	0.5377	19.2169	0.4144	4.1693	0.4865	1.2198	0.5447	0.5377	0.4609	2.2814	0.433	2.428	0.3794	0.4633	0.6402	0.5098	0.4842	0.4865	1.9229
L33-F05	264.6	0.6463	0.907	1.2925	0.5593	0.5215	0.5329	0.5782	0.5215	0.5102	4.059	0.6841	2.0446	1.2245	0.5556	1.1376	1.0129	0.6311	0.6916	0.6652	2.4452	0.6992	0.6727	2.74	1.0582	1.13	0.5896	0.5896	0.616	1.4324	0.6954	27.6117	0.5858	5.257	0.7105	1.5268	0.6916	0.5707	0.6349	1.9652	0.6236	3.6584	0.5556	0.6387	0.8541	0.6576	0.6009	0.6841	2.2033
L33-F06	296.49	0.6779	0.6172	0.7454	0.516	0.4553	0.4958	0.6105	0.4756	0.5059	3.076	0.6611	1.1198	0.7926	0.425	0.9747	0.9039	0.4992	0.4789	0.5869	1.0355	0.4992	0.5464	1.8584	0.7353	0.9747	0.5228	0.4891	0.6543	1.049	0.5565	13.7612	0.5363	3.0389	0.4452	1.0557	0.5194	0.57	0.5262	1.2614	0.5464	2.1687	0.4891	0.5869	0.6678	0.6172	0.5228	0.5295	1.42
L33-F07	372.63	0.8239	0.5072	0.738	0.416	0.3918	0.3811	0.4777	0.3811	0.3703	3.7625	0.5797	1.6343	0.7809	0.365	0.9393	0.8749	0.5314	0.4643	0.5448	1.1674	0.4106	0.5985	2.6434	1.1405	1.366	0.4992	0.4482	0.5689	1.2667	0.5716	19.4993	0.4831	4.1999	0.4696	1.2398	0.5287	0.6441	0.6307	1.3901	0.5689	2.0959	0.5662	0.5501	0.7273	0.4696	0.5099	0.5716	1.9376
L33-F08	351.98	0.662	0.5341	0.8069	0.4745	0.4262	0.4489	0.4489	0.5086	0.429	2.7985	0.6534	1.1734	1.3126	0.4233	0.8836	0.6534	0.4205	0.4176	0.5568	0.9859	0.4887	0.5597	2.0058	0.733	0.9006	0.4659	0.4943	0.4688	1.0569	0.5909	15.4071	0.4858	3.4206	0.429	0.9404	0.4858	0.5512	0.4347	1.3296	0.4404	1.6365	0.4375	0.6194	0.6478	0.5455	0.5228	0.6023	1.4205
L33-F09	299.28	0.7485	0.6683	0.9523	0.4511	0.4544	0.5146	0.5146	0.4645	0.4878	3.7189	0.685	0.6349	0.7852	0.5146	1.0191	0.9122	0.4979	0.4812	0.4244	0.8921	0.4244	0.5279	0.675	0.6816	1.0091	0.5279	0.4611	0.685	1.0291	0.5781	21.0573	0.4778	4.0664	0.4444	1.4735	0.5881	0.5413	0.4812	1.7876	0.6583	2.7232	0.4611	0.7017	0.7084	0.4544	0.5446	0.6683	1.948
L33-F10	384.68	0.4653	0.3691	0.8605	0.5121	0.4107	0.3639	0.4887	0.3639	0.3795	1.8613	0.4653	0.4575	0.6837	0.4029	0.7565	0.7019	0.4211	0.4601	0.3405	0.7383	0.4393	0.4653	0.5693	0.6707	0.8111	0.4419	0.3457	0.4263	0.8371	0.5121	19.611	0.4809	4.0007	0.4367	1.1932	0.5797	0.4991	0.4653	1.448	0.5043	1.3024	0.4497	0.3821	0.5719	0.4419	0.4133	0.4679	1.5779
L33-F11	345.64	0.4687	0.4022	0.6047	0.4398	0.4803	0.4427	0.5468	0.4079	0.3559	1.7764	0.5237	1.2933	0.6047	0.4137	0.7407	0.6076	0.4918	0.4369	0.5179	1.2904	0.5295	0.7638	2.656	0.9895	1.2209	0.5237	0.5381	0.4947	1.1457	0.5989	13.5373	0.4976	2.9829	0.5092	1.1023	0.5873	0.5757	0.5266	1.4119	0.4918	1.9356	0.4311	0.4976	0.8072	0.541	0.5873	0.5381	1.516
L33-F12(pET28)	408.79	0.3938	0.34	0.8122	0.4305	0.3547	0.3572	0.3792	0.3449	0.3743	1.798	0.4795	2.3484	0.5284	0.4477	0.7143	0.636	0.477	0.4672	0.5137	1.0494	0.4134	0.5357	3.3294	0.8219	0.9981	0.4134	0.3376	0.4257	1.0788	0.5602	22.902	0.4941	4.8925	0.5822	1.1742	0.4721	0.5235	0.4085	1.1424	0.3816	1.1204	0.4159	0.4379	0.7706	0.4477	0.499	0.6214	2.4781
L33-G01	312.74	0.7354	0.8122	0.9209	0.486	0.3933	0.5787	0.5404	0.5276	0.4732	4.6588	0.6619	2.3885	0.7898	0.4157	1.1863	0.9145	0.4732	0.5724	0.6555	1.0967	0.5692	0.6779	3.8914	1.0232	1.2246	0.5819	0.4445	0.5979	1.6659	0.6555	25.126	0.486	5.3718	0.566	1.3078	0.5564	0.6715	0.5404	2.3502	0.5851	2.7019	0.518	0.6171	0.8825	0.55	0.5468	0.7514	2.2159
L33-G02	397.09	0.753	0.5314	0.7077	0.3828	0.3954	0.4483	0.4734	0.3702	0.4105	3.09	0.6145	2.1532	0.7681	0.4886	0.7555	0.7379	0.481	0.4256	0.612	1.1333	0.4634	0.6674	3.4023	0.9469	1.2038	0.4206	0.345	0.4457	1.2491	0.622	16.2307	0.4533	3.6239	0.4055	0.957	0.4734	0.5213	0.486	1.9568	0.4206	2.1204	0.4105	0.481	0.7001	0.4457	0.4835	0.6145	1.6394
L33-G03	355.61	0.4302	0.6524	1.2823	0.419	0.4077	0.5005	0.464	0.3993	0.4274	1.9263	0.4921	1.6844	0.8296	0.4106	0.9083	1.4651	0.5315	0.4724	0.5877	1.1726	0.5455	0.5202	2.3818	0.8605	1.1079	0.4865	0.5427	0.4612	1.2457	0.6918	33.438	0.5118	6.9148	0.5034	1.6591	0.5287	0.5034	0.4527	2.2553	0.4752	3.5966	0.4921	0.599	0.6046	0.4218	0.5174	0.7593	2.4296
L33-G04	301.18	0.5877	0.8234	1.0758	0.5811	0.4582	0.4814	0.5047	0.518	0.4549	3.9777	0.7404	1.876	0.9928	0.5678	1.2551	1.109	0.5977	0.5312	0.6043	1.1322	0.5744	0.7139	2.9053	0.8832	1.0293	0.5213	0.5113	0.6906	1.7166	0.8832	34.6473	0.674	7.2549	0.5777	1.5273	0.6043	0.7371	0.5512	2.4072	0.5611	2.3375	0.6375	0.6043	0.6906	0.5146	0.7271	0.7338	2.2877
L33-G05	406.72	0.4942	0.4327	0.8655	0.4352	0.3909	0.3467	0.4524	0.3959	0.4081	1.5539	0.418	1.3302	0.9884	0.4032	0.7352	0.5606	0.3786	0.418	0.4622	1.2171	0.4106	1.0277	1.6203	0.7376	0.8114	0.4155	0.6221	0.509	0.8606	0.5926	18.5289	0.5188	3.6586	0.4647	1.0253	0.5581	0.5557	0.4819	1.281	0.4377	1.0204	0.4401	0.4426	0.5409	0.3836	0.4032	0.4622	1.3843
L33-G06	320.59	0.5771	0.9015	1.0387	0.5022	0.4741	0.446	0.4429	0.4679	0.496	4.1049	0.68	0.9638	1.0356	0.4554	1.3038	0.7455	0.5427	0.602	0.5771	1.5658	0.4648	1.2664	1.4286	0.8952	1.1416	0.5303	0.6051	0.5833	1.2477	0.6301	25.4123	0.4585	5.1717	0.4741	1.3881	0.6893	0.5615	0.5365	2.4954	0.4585	1.7374	0.418	0.4804	0.7393	0.5396	0.4897	0.6114	2.0493
L33-G07	369.25	0.4685	0.4279	0.7204	0.39	0.3791	0.4062	0.4848	0.4171	0.4496	2.004	0.5091	1.262	0.4983	0.4035	0.6879	0.6391	0.4712	0.39	0.4496	0.6798	0.5118	0.5308	1.9661	0.6906	0.8747	0.4333	0.5173	0.4468	1.0291	0.5768	18.6566	0.4658	4.0541	0.4875	1.0508	0.4468	0.4983	0.4414	1.3595	0.4577	1.3108	0.4712	0.5768	0.5795	0.4739	0.4848	0.5389	1.6059
L33-G08	370.87	0.4287	0.4692	0.7334	0.4072	0.3721	0.4449	0.4072	0.4233	0.4099	1.4695	0.515	2.0466	0.8251	0.4449	0.6957	0.6957	0.515	0.4854	0.5824	1.0219	0.5123	0.5959	3.0469	1.0543	1.2269	0.4934	0.4557	0.5231	1.4803	0.5582	20.5142	0.4719	4.3142	0.453	1.0947	0.5339	0.604	0.4961	2.1005	0.4907	1.8659	0.4099	0.4233	0.7739	0.5285	0.4934	0.5393	1.9171
L33-G09	431.14	0.4036	0.3665	0.7677	0.3734	0.3804	0.4175	0.3456	0.3873	0.3038	1.5331	0.4013	1.1133	0.8651	0.443	0.835	0.6773	0.3943	0.3873	0.3827	0.7724	0.4523	0.4755	1.6769	0.6749	0.828	0.4152	0.3363	0.436	0.9231	0.5103	19.4251	0.4268	4.2608	0.4245	1.3105	0.3549	0.4708	0.3966	1.3708	0.341	0.9324	0.4013	0.392	0.5149	0.3665	0.45	0.559	1.5146
L33-G10	374.52	0.7503	0.6328	0.777	0.4032	0.4352	0.4139	0.4539	0.4245	0.4165	3.5593	0.6034	1.7035	1.3724	0.4459	0.8731	0.6969	0.4432	0.4165	0.5127	1.327	0.4806	0.5607	2.8811	1.0413	1.0467	0.55	0.4459	0.5207	1.1882	0.5901	21.3129	0.5767	4.371	0.4539	1.1161	0.5848	0.5233	0.5073	1.7543	0.4326	2.0987	0.5127	0.5394	0.8357	0.5741	0.502	0.5474	1.797
L33-G11	283.64	0.7827	0.9554	1.2798	0.6381	0.5077	0.4865	0.5817	0.5218	0.5042	5.6444	0.7827	0.7439	0.5535	0.4724	1.3644	1.04	0.5112	0.5535	0.4971	0.8356	0.5888	0.8955	0.765	0.7051	0.9202	0.5782	0.7968	0.6452	0.9942	0.7016	27.3619	0.5676	5.7995	0.6734	1.6218	0.6346	0.5852	0.55	1.3256	0.6134	1.9496	0.5077	0.5535	0.6593	0.4795	0.6134	0.691	2.3304
L33-G12(WT)	336.27	0.5026	0.5591	0.684	0.4342	0.4758	0.4193	0.4788	0.3598	0.4015	1.5999	0.5145	1.2044	1.2014	0.4431	0.8178	0.7018	0.4461	0.4193	0.4996	1.481	0.4312	0.571	1.8229	0.7732	0.5264	0.3955	0.5264	0.4639	0.9516	0.4907	17.483	0.4699	3.4496	0.449	0.8832	0.4818	0.4342	0.4312	0.5353	0.4669	0.4847	0.4609	0.345	0.5145	0.5026	0.5115	0.4699	1.0765
L33-H01	489.74	0.5186	0.4431	0.8168	0.3737	0.3185	0.3696	0.392	0.292	0.2838	1.801	0.3982	2.2053	1.4028	0.3737	0.7698	0.5309	0.3716	0.3206	0.5289	0.9148	0.3675	0.4635	3.6019	0.8454	0.972	0.3798	0.3369	0.3247	1.4089	0.5125	24.2335	0.39	5.5234	0.3859	1.313	0.4696	0.5064	0.4186	2.046	0.3798	1.0067	0.4288	0.3308	0.5799	0.4023	0.3982	0.5125	1.6335
L33-H02	450.36	0.5262	0.5507	0.7838	0.4485	0.3442	0.3841	0.3841	0.3064	0.3686	3.3329	0.5818	1.0059	1.0369	0.3708	0.8926	0.7705	0.3975	0.3353	0.3575	0.8438	0.3841	0.6461	1.3767	0.735	0.8482	0.4463	0.3242	0.5151	1.2101	0.5396	19.9063	0.3952	3.9924	0.4086	1.0303	0.5462	0.5351	0.4019	1.6875	0.3841	1.7586	0.4619	0.4241	0.5373	0.4419	0.4152	0.4885	1.5921
L33-H03	417.81	0.4548	0.3997	0.6893	0.3782	0.3997	0.371	0.3877	0.3806	0.3447	1.7975	0.45	2.0177	1.594	0.4954	0.7515	0.529	0.3734	0.4332	0.5218	0.9119	0.4332	0.5337	3.0636	0.9622	1.022	0.5122	0.3782	0.4021	1.0316	0.5146	18.6498	0.4308	4.0258	0.4284	1.0603	0.517	0.5266	0.4428	1.8813	0.4404	1.0986	0.3494	0.3758	0.6869	0.4667	0.5433	0.5529	1.6371
L33-H04	352.22	0.7041	0.5196	0.6956	0.4486	0.4486	0.4571	0.4429	0.4628	0.3918	2.1634	0.5735	2.0243	1.7546	0.4826	0.7722	0.7098	0.4685	0.4032	0.599	1.1811	0.5337	0.6218	3.4012	0.9937	1.411	0.5224	0.4968	0.5423	1.2009	0.6076	13.9144	0.4486	3.2621	0.5309	0.9511	0.5366	0.4713	0.5508	2.4246	0.4826	2.0924	0.4798	0.5394	0.7722	0.5309	0.4997	0.5565	1.482
L33-H05	310.21	0.5061	0.7479	0.8188	0.4964	0.4707	0.49	0.5029	0.4997	0.4384	2.0244	0.7511	1.4281	0.7898	0.49	0.9316	0.8381	0.4835	0.4642	0.6093	0.7576	0.4352	0.5835	2.3694	0.8381	0.9413	0.5158	0.461	0.851	1.0702	0.606	14.0389	0.4545	3.1108	0.4578	0.8704	0.4932	0.5931	0.5255	1.2669	0.4642	1.6956	0.5319	0.5093	0.5996	0.4158	0.4707	0.5512	1.499
L33-H06	359.58	0.609	0.5145	0.7342	0.4144	0.4172	0.3754	0.4005	0.4032	0.3671	2.6531	0.5729	1.232	0.5089	0.4144	0.7759	0.6758	0.4311	0.3727	0.5256	0.7815	0.4032	0.495	1.88	0.7453	0.8343	0.5117	0.3782	0.5618	1.1041	0.5673	17.6093	0.4783	3.86	0.4644	1.0067	0.52	0.4839	0.47	1.2209	0.4394	1.257	0.5061	0.4895	0.6285	0.4672	0.4533	0.5479	1.499
L33-H07	421.11	0.4821	0.4963	0.7267	0.4061	0.3562	0.3515	0.4322	0.3895	0.361	2.5172	0.5533	1.6718	0.6245	0.3942	0.7979	0.7195	0.4084	0.4322	0.4417	0.938	0.4488	0.5058	2.5575	1.0876	1.299	0.4393	0.3942	0.4963	1.1921	0.6032	17.454	0.4274	3.8066	0.4417	1.0164	0.4369	0.5794	0.4939	1.6314	0.4512	1.5673	0.4274	0.5296	0.6625	0.4037	0.4393	0.5177	1.762
L33-H08	427	0.5152	0.37	0.8548	0.4473	0.3466	0.2951	0.4496	0.3466	0.3349	2.7635	0.5035	0.5831	0.3981	0.3372	0.8431	0.733	0.4075	0.3349	0.4169	0.4309	0.4567	0.3958	0.7049	0.4895	0.5621	0.3911	0.3911	0.3981	0.9274	0.5761	22.8501	0.4684	4.8618	0.3841	1.2389	0.459	0.5457	0.3349	0.808	0.3138	0.6417	0.4778	0.3115	0.4169	0.356	0.3653	0.4918	1.5152
L33-H09	369.73	0.6085	0.4571	0.7789	0.4679	0.357	0.4192	0.449	0.4003	0.3976	1.804	0.4598	0.9277	0.522	0.4084	0.7086	0.6816	0.4219	0.3868	0.4354	0.7438	0.4057	0.4544	1.328	0.7627	0.8655	0.522	0.4733	0.5112	0.9277	0.5031	18.6404	0.4787	4.0218	0.4787	1.1738	0.4571	0.4977	0.476	1.493	0.4327	1.4335	0.4436	0.4084	0.5977	0.4652	0.4544	0.4868	1.5254
L33-H10	409.04	0.5329	0.4034	0.8263	0.4376	0.4205	0.4132	0.4278	0.3496	0.3569	2.4472	0.4987	1.5964	0.7994	0.4205	0.7774	0.6136	0.4352	0.4156	0.4914	1.4644	0.5158	0.4963	2.6085	0.9803	1.105	0.4743	0.555	0.4987	1.193	0.4963	20.9782	0.4352	4.3198	0.4645	1.1539	0.4816	0.4767	0.4547	1.7578	0.3985	1.5817	0.4474	0.4132	0.6919	0.4547	0.4474	0.4718	1.7944
L33-H11	341.55	0.7495	0.5446	0.9428	0.486	0.4743	0.4802	0.4772	0.404	0.3777	2.4301	0.5563	1.6659	0.9281	0.4655	0.7554	0.8022	0.4743	0.4304	0.5153	1.4083	0.4889	0.5504	2.3891	0.8666	0.7085	0.4626	0.5387	0.4714	0.9691	0.5094	19.2064	0.568	4.1019	0.5094	1.2531	0.6061	0.5299	0.448	0.9105	0.4977	0.9457	0.5153	0.448	0.5534	0.4304	0.4831	0.5475	1.4522
L33-H12	293.74	0.6128	0.6298	0.7898	0.497	0.5209	0.4936	0.7796	0.4664	0.3745	2.2639	0.606	1.7294	0.6434	0.5345	0.8034	2.7508	0.6639	0.4834	0.7388	1.1813	0.5788	0.6979	3.3976	4.5619	0.8783	0.6605	0.5651	0.6502	0.7558	0.5481	10.2984	0.4868	2.5806	0.4392	0.9941	0.5073	0.589	0.4528	0.5481	0.6605	0.9635	0.5004	0.5311	0.5753	0.5822	0.6502	0.7081	1.1064
[truncated: 158 more columns]

## Sheet: V65
Sample Name	Mean Intensity	m/z 102.17	m/z 104.15	m/z 107.09	m/z 108.11	m/z 110.11	m/z 111.10	m/z 113.13	m/z 114.11	m/z 115.13	m/z 117.18	m/z 118.14	m/z 119.13	m/z 120.11	m/z 121.09	m/z 122.12	m/z 123.09	m/z 124.11	m/z 127.11	m/z 129.10	m/z 130.10	m/z 131.10	m/z 133.13	m/z 135.12	m/z 136.11	m/z 137.11	m/z 138.12	m/z 139.09	m/z 140.11	m/z 144.10	m/z 145.09	m/z 146.10	m/z 146.73	m/z 147.10	m/z 147.77	m/z 148.11	m/z 149.12	m/z 150.13	m/z 151.15	m/z 152.10	m/z 153.10	m/z 155.12	m/z 155.61	m/z 156.12	m/z 160.12	m/z 161.12	m/z 162.11	m/z 163.11	m/z 164.12
V65-A01	286.61	0.7467	1.1863	0.8897	0.635	0.485	0.5199	0.5966	0.5478	0.5234	2.8471	0.8827	1.9225	1.127	0.5757	0.635	0.8234	0.5757	0.5583	0.7083	1.448	0.5687	0.628	2.9029	0.8932	0.5408	0.4466	0.5722	0.8758	1.1723	0.649	20.0865	0.5338	3.981	0.5513	1.1758	0.5652	0.5548	0.4815	0.6664	0.485	0.642	0.5513	0.478	0.7083	0.6385	0.6559	0.6908	1.4026
V65-A02	305.77	1.5829	0.5069	0.7784	0.5494	0.5527	0.5658	0.7947	0.5167	0.5789	6.0831	0.7326	1.9983	0.7849	0.52	0.8307	0.8176	0.5756	0.4382	0.641	1.6189	0.5298	0.5952	3.7807	0.9092	0.8274	0.556	0.4546	0.6377	1.112	0.5691	16.0808	0.5037	3.5746	0.5069	1.1021	0.5658	0.5364	0.5658	1.1152	0.5298	1.0269	0.4775	0.6083	0.6901	0.5429	0.6181	0.5723	1.4881
V65-A03	311.79	1.1258	0.6318	0.8628	0.4618	0.5484	0.5132	0.4907	0.5292	0.4169	3.8455	0.6735	1.9244	1.3952	0.4939	0.7345	0.712	0.4875	0.5741	0.6703	1.8442	0.6062	0.6735	2.9924	1.0712	0.9718	0.5869	0.51	0.5228	1.052	0.6415	15.9754	0.4362	3.3933	0.4811	1.0744	0.4971	0.6286	0.4651	1.1931	0.51	1.6614	0.51	0.5132	0.6799	0.5901	0.5035	0.5581	1.3759
V65-A04	223.9	0.7816	2.2778	1.3086	0.7012	0.6119	0.6744	0.67	0.8575	2.9165	3.7964	6.7085	2.4565	2.1215	1.858	1.4873	1.2461	0.7102	0.8709	0.862	2.8853	0.7816	6.838	3.524	1.3265	2.452	0.6566	118.068	11.2776	1.2372	0.9022	28.8929	0.6923	6.6995	0.6789	1.8223	0.6521	0.9335	0.6834	3.2604	1.4471	3.4391	0.6253	8.3074	1.063	0.6476	0.7593	0.8039	2.6486
V65-A05	273.43	1.5872	0.885	1.0789	0.5888	0.4718	0.4535	0.501	0.5559	0.5632	3.7559	0.7205	0.8156	0.8887	0.5047	0.918	1.0094	0.5303	0.5084	0.5852	1.0204	0.5266	0.5084	1.0898	0.885	0.8741	0.5925	0.6766	0.5742	1.0825	0.6546	26.3903	0.629	5.1018	0.512	1.5104	0.512	0.5559	0.4827	2.3369	0.5998	2.2345	0.5852	0.6108	0.6546	0.5047	0.6108	0.6583	1.8725
V65-A06	323.7	0.8434	0.5159	0.8495	0.4294	0.414	0.5097	0.6333	0.4572	0.414	2.7896	0.5344	1.5848	0.7723	0.4325	0.658	0.831	0.4819	0.4974	0.5746	1.1214	0.4572	0.5561	3.0892	0.8743	1.0225	0.5375	0.4356	0.5622	1.1276	0.6178	14.3866	0.5283	3.3518	0.5097	1.0751	0.6148	0.5561	0.5252	1.6836	0.5777	2.2026	0.4727	0.6086	0.6827	0.5622	0.5128	0.587	1.4828
V65-A07	319.01	0.9592	0.4608	0.7743	0.5454	0.4859	0.5298	0.6081	0.4765	0.5016	2.9905	0.5642	2.047	0.6865	0.4577	0.7523	0.9247	0.4796	0.511	0.6896	0.9937	0.4859	0.7429	3.166	1.0313	1.2476	0.5423	0.536	0.5486	0.9373	0.5705	16.7424	0.5172	3.7867	0.5392	1.0564	0.5956	0.605	0.5642	1.8557	0.5016	1.8871	0.5517	0.652	0.8213	0.5235	0.5893	0.5956	1.8463
V65-A08	207.75	0.722	0.7076	1.6606	0.7605	0.6643	0.6498	0.6113	0.6065	0.5584	3.0132	0.7316	2.3827	0.8664	0.6258	0.9771	1.16	0.6594	0.7509	0.7316	1.1119	0.6691	0.698	3.4705	1.2948	1.6943	0.5921	0.6209	0.645	1.7569	0.8087	31.6149	0.7172	6.7485	0.7702	2.142	0.8327	1.0349	0.7124	4.3177	0.8279	3.3935	0.6161	0.6883	1.0301	0.6739	0.9386	0.9386	3.3839
V65-A09	356.85	0.765	0.4259	0.7818	0.454	0.4287	0.3811	0.4764	0.4231	0.3643	3.1273	0.5016	1.5076	1.1125	0.4091	1.0284	0.7846	0.4512	0.44	0.4932	1.3787	0.5128	0.5857	2.4716	0.8827	0.7146	0.4512	0.3671	0.4932	0.8743	0.6249	17.3713	0.4484	3.6009	0.4988	1.0985	0.5577	0.5128	0.4091	1.233	0.4736	1.4376	0.5016	0.4848	0.4932	0.3867	0.4372	0.4988	1.2078
V65-A10	303.9	0.4837	3.8368	0.8128	2.3889	0.5561	0.5397	0.6351	0.4837	0.6943	1.4939	34.3041	4.156	0.9082	0.6779	257.296	11.948	1.2932	0.7173	0.6779	1.5169	0.6449	1.0036	3.4617	1.9645	1.721	0.5857	0.6746	36.0415	14.0869	1.0563	19.2366	0.5561	4.5903	0.5232	1.28	0.6844	0.8457	0.5791	2.6259	0.5923	2.9154	0.4409	3.0076	1.6058	0.7305	0.7141	0.7141	2.9121
V65-A11	232.55	0.6364	0.7009	1.3073	0.6794	0.6364	0.5504	0.688	0.5891	0.5332	1.948	0.7525	1.6341	0.9546	0.6837	5.4097	1.1826	0.6364	0.602	0.6966	1.0751	0.6751	0.8342	2.1931	1.1052	1.2041	0.6235	0.6407	0.9632	1.6771	0.817	32.7719	0.774	7.4437	0.6321	2.034	0.7955	0.7998	0.6837	2.421	0.7009	3.1564	0.5891	0.6278	0.7525	0.8299	0.6665	0.8385	2.3823
V65-A12	204.63	1.1533	0.7428	1.1875	0.7184	0.6499	0.7135	0.7868	0.7233	0.6597	3.8508	0.8747	3.3915	1.7104	0.6499	1.5931	1.0311	0.6842	0.6939	0.8992	1.1386	0.6451	0.9383	4.6034	1.466	1.6469	0.7477	0.6011	0.7428	1.4954	0.8796	26.9118	0.6402	6.0059	0.8356	1.9254	0.7868	0.7233	0.6402	3.6896	0.7575	4.5838	0.6744	0.8308	1.0458	0.7477	0.8356	0.8405	2.2724
V65-B01	257.47	0.6059	3.4762	0.9127	0.5943	0.5127	0.5166	0.4661	0.5904	0.5127	1.0448	1.8177	1.5847	0.7263	0.6331	0.6836	0.7729	0.6137	0.5399	0.7069	1.0642	0.6059	0.6176	2.3343	0.769	0.7613	0.6642	0.5321	2.0974	0.9477	0.7108	13.3687	0.5515	2.8703	0.5515	0.9477	0.5282	0.6409	0.536	1.5109	0.602	0.8661	0.5787	0.7807	0.738	0.6603	0.668	0.7263	1.305
V65-B02	318.28	0.7069	0.4493	0.7572	0.5247	0.4367	0.487	0.5247	0.4493	0.443	2.3375	0.5121	1.6903	0.531	0.4713	0.7226	0.7006	0.4838	0.4744	0.6127	0.8483	0.4619	0.5938	2.5009	0.9488	1.0305	0.5812	0.4838	0.5624	1.1436	0.6566	18.2636	0.6158	3.9776	0.5812	1.3321	0.6504	0.7101	0.5844	1.4987	0.553	1.3353	0.6095	0.6347	0.6975	0.5121	0.5593	0.6284	1.6715
V65-B03	292.89	0.9901	0.5429	0.997	0.5497	0.4541	0.4712	0.5531	0.4712	0.4985	4.1142	0.6863	1.3828	0.6009	0.4746	0.7682	1.1848	0.5668	0.6112	0.6555	1.2565	0.5531	0.6009	2.2159	0.898	1.014	0.519	0.4951	0.5736	1.1335	0.6419	23.7157	0.5634	4.6878	0.5838	1.3964	0.5838	0.6931	0.5292	2.7383	0.5668	3.0797	0.5087	0.6555	0.7648	0.5907	0.7033	0.6146	2.1032
V65-B04	222.48	1.0608	0.7461	1.1911	0.6922	0.7057	0.7956	0.7506	0.6607	0.6787	5.1961	0.8046	2.3463	0.854	0.7057	1.0518	1.1552	0.6967	0.7596	0.7821	1.1417	0.6652	0.7776	3.3891	1.344	1.4968	0.7057	0.5978	0.6652	1.5417	0.872	27.2794	0.7506	5.7175	0.6607	1.5552	0.6877	0.8405	0.6922	3.2858	0.7956	3.3891	0.6877	0.7551	0.9844	0.7057	0.8091	0.908	2.5216
V65-B05	211.94	0.6417	0.7691	1.2456	0.8351	0.7408	0.7644	0.7408	0.8776	0.7313	4.8315	5.4024	1.9487	0.788	0.6983	1.0805	1.0946	0.6889	0.6747	0.7738	1.2881	0.8304	0.788	2.5196	1.3541	1.7269	0.9153	0.5898	8.1909	1.524	0.9248	32.9431	0.7408	6.917	0.7266	1.9439	0.7455	0.8493	0.7596	4.5579	0.9578	3.0716	0.9861	1.6703	0.9956	0.887	0.9908	0.9484	3.1377
V65-B06	202.88	0.626	5.4319	1.0499	0.7591	0.7739	0.6999	0.6901	0.8084	0.6457	1.3654	1.533	1.4787	1.0893	0.7591	0.8872	1.2569	0.6556	0.8281	0.6802	1.0302	0.6851	0.7591	1.8386	1.1189	1.1978	0.8084	0.5718	1.9273	1.1633	0.9217	21.6093	0.6161	4.4756	0.7689	1.2717	0.695	0.7443	0.6506	4.2095	0.7739	2.2723	0.5964	0.8281	0.9464	0.6753	0.8084	0.833	1.7597
V65-B07	260.82	0.4946	0.671	1.2767	0.5598	0.4639	0.4908	0.5444	0.5368	0.5253	2.0704	0.717	1.5106	0.7936	0.5406	0.8358	1.2844	0.6058	0.5559	0.6978	1.1234	0.74	0.5904	2.0704	1.0237	1.1004	0.6326	0.5444	0.5559	1.3151	0.8166	35.0353	0.7591	7.3997	0.6326	2.1662	0.7093	0.8397	0.6671	2.2851	0.6326	2.5995	0.671	0.6173	0.717	0.6556	0.6671	0.7706	2.4614
V65-B08	319.95	0.672	0.6813	1.0533	0.4969	0.4594	0.4594	0.5313	0.4407	0.4751	4.2131	0.6063	1.4221	1.1689	0.547	0.8189	0.8532	0.4563	0.5751	0.5688	2.0284	0.6032	0.6126	2.5566	0.8845	0.9658	0.5376	0.4844	0.5782	1.2627	0.7126	23.1814	0.6001	4.5131	0.5032	1.197	0.597	0.5438	0.4344	1.6534	0.4782	2.5816	0.4594	0.5876	0.8064	0.5407	0.6001	0.6126	1.7065
V65-B09	286.6	1.3399	0.5967	0.8234	0.492	0.5094	0.499	0.5199	0.5024	0.5129	5.2443	0.649	1.1584	0.8165	0.499	0.8863	0.7013	0.5304	0.5199	0.4955	0.9351	0.5059	0.5687	1.7027	0.8863	0.813	0.5199	0.4606	0.6211	0.963	0.5618	12.3273	0.5338	2.8367	0.5129	0.8967	0.5408	0.5338	0.5129	1.284	0.5757	1.1619	0.6001	0.6071	0.7467	0.5234	0.6036	0.5373	1.2247
V65-B10	410.95	0.4964	0.3455	0.7836	0.4234	0.3455	0.309	0.3845	0.3309	0.3674	1.9175	0.4258	0.9174	0.6132	0.348	0.786	0.64	0.3966	0.3991	0.3796	0.9393	0.4331	0.4161	1.4138	0.8322	0.8979	0.4185	0.3431	0.348	1.0877	0.567	23.3363	0.4307	4.7354	0.4356	1.2337	0.4502	0.4696	0.4234	2.01	0.4039	0.9758	0.4015	0.3723	0.4842	0.3966	0.4283	0.4964	1.7934
V65-B11	224.42	0.7308	0.762	0.967	0.6016	0.5615	0.6194	0.6417	0.6417	0.5525	2.9499	0.704	1.7245	0.7263	0.606	1.0338	1.2477	0.6016	0.6194	0.7085	0.7976	0.5704	0.6595	2.3082	0.958	1.1853	0.7174	0.7397	0.86	1.1675	0.8021	25.1542	0.7531	5.1913	0.6862	1.3814	0.6773	0.6105	0.6862	2.0988	0.762	2.1121	0.7352	0.8466	0.811	0.6506	0.8199	0.7664	2.2993
V65-B12	342.56	0.5838	0.5138	1.0013	0.4846	0.4787	0.4612	0.4963	0.4058	0.4233	3.6461	0.6247	2.7294	0.7765	0.4496	0.8261	0.8407	0.4641	0.4408	0.6539	0.9429	0.4583	0.6568	4.3262	1.2669	1.5413	0.5634	0.4233	0.5167	1.3866	0.6043	24.7254	0.5751	5.237	0.5138	1.3311	0.5663	0.6305	0.4817	3.8095	0.5576	1.9383	0.543	0.5079	0.7765	0.4846	0.543	0.7269	2.4083
V65-C01	263.56	0.6602	0.6754	1.0965	0.6336	0.5805	0.5388	0.5995	0.5578	0.5008	3.6349	0.6412	2.0982	0.6147	0.5236	0.9941	1.0434	0.554	0.4857	0.7057	0.7892	0.535	0.6223	3.2403	0.9789	0.9448	0.5426	0.5691	0.5578	1.6012	0.774	29.6139	0.6564	6.1504	0.6147	1.6846	0.6943	0.7095	0.6905	1.7491	0.5767	1.3697	0.6071	0.5274	0.903	0.645	0.8727	0.683	2.4245
V65-C02	287.92	0.9204	2.2715	0.8961	0.6321	0.5314	0.5453	0.5453	0.5627	0.5314	3.4211	0.9517	1.9832	1.1496	0.514	0.8127	0.8892	0.5245	0.5418	0.58	1.0732	0.5453	0.6287	2.6362	1.0524	0.7954	0.6113	0.7954	0.9447	1.1392	0.6252	19.3703	0.6182	4.2061	0.5974	1.1045	0.5522	0.6078	0.5557	1.8756	0.5905	1.4483	0.5071	0.6009	0.6391	0.5592	0.5835	0.653	1.4032
V65-C03	377.76	0.4659	0.3944	0.8233	0.4341	0.3944	0.3944	0.5136	0.3971	0.4288	2.0383	0.5215	1.7445	0.503	0.4209	0.6962	0.728	0.4553	0.4236	0.5347	0.5903	0.3706	0.5559	2.941	0.9477	0.9186	0.4447	0.3627	0.4606	0.8948	0.5559	21.4026	0.593	4.6829	0.4633	1.4083	0.4924	0.5533	0.4633	1.7577	0.4527	0.9689	0.4738	0.4527	0.6539	0.4738	0.4553	0.5797	1.7286
V65-C04	343.33	0.5359	0.4951	0.7631	0.4311	0.4019	0.4777	0.533	0.3816	0.3816	2.3359	0.5796	1.1272	0.5505	0.4049	0.734	0.734	0.4049	0.4107	0.565	0.7107	0.4631	0.5592	1.998	0.6932	0.9582	0.501	0.4107	0.5301	0.9845	0.5738	16.8291	0.4922	3.9058	0.4835	1.101	0.5184	0.5243	0.5301	1.6019	0.4806	1.4825	0.4049	0.4951	0.6175	0.4718	0.5301	0.6582	1.6485
V65-C05	296.75	0.8222	0.5358	0.8189	0.6133	0.5156	0.4617	0.6773	0.4549	0.4987	3.0059	0.6504	1.0581	0.7919	0.4954	0.7144	0.7751	0.465	0.5762	0.5661	0.92	0.4886	0.5223	1.8298	0.7649	0.9267	0.6032	0.4751	0.5358	1.1221	0.5998	12.3435	0.5392	2.7868	0.5493	1.0817	0.5796	0.5594	0.5189	1.2637	0.4987	1.5467	0.5493	0.5358	0.6234	0.5392	0.5594	0.5729	1.2199
V65-C06	206.64	0.6485	0.9195	1.2243	0.6678	0.6098	0.6969	0.7356	0.6146	0.663	4.7328	0.7501	1.8825	0.7307	0.7646	0.842	1.1808	0.7211	0.7549	0.8566	1.0598	0.8324	0.8808	2.6568	1.0888	1.0937	0.7936	0.7501	0.813	1.2727	0.9001	30.4198	0.9049	6.8137	0.8227	2.1486	0.7356	0.8275	0.8033	2.2987	0.7356	2.8165	0.7743	0.7694	0.7646	0.6823	0.7888	0.9824	2.5842
V65-C07	397.57	0.4804	0.3999	0.8904	0.4653	0.4351	0.3723	0.4201	0.415	0.3773	1.5268	0.4653	0.8426	0.6816	0.4678	0.6791	0.6137	0.4351	0.4201	0.3924	1.0438	0.4175	0.4024	1.069	0.576	0.6691	0.4125	0.3446	0.4301	0.8753	0.5257	20.3562	0.4804	4.0899	0.4553	1.2275	0.5031	0.4653	0.3949	1.0665	0.3949	0.8728	0.4201	0.3848	0.4603	0.3521	0.4628	0.5056	1.3331
V65-C08	376.67	0.6982	0.5389	0.8416	0.4619	0.3584	0.377	0.531	0.3876	0.3743	3.0053	0.4832	1.569	0.5708	0.3664	0.8177	0.8389	0.4805	0.3717	0.5655	0.7035	0.4062	0.5124	2.4451	0.8097	1.0752	0.4965	0.4195	0.4832	1.2743	0.5841	21.4484	0.4593	4.6486	0.4115	1.2743	0.4752	0.5495	0.3956	2.4663	0.5177	1.5504	0.4752	0.438	0.6611	0.4646	0.5734	0.6186	1.9327
V65-C09	405	0.4988	0.3753	0.758	0.4247	0.3679	0.4272	0.442	0.3753	0.358	1.7877	0.4494	1.3852	0.5556	0.3506	0.6988	0.6173	0.4074	0.3531	0.4148	0.6321	0.4222	0.4247	1.884	0.7827	0.758	0.3975	0.3235	0.4296	0.7852	0.4296	16.8272	0.437	3.6272	0.4148	1.1975	0.4716	0.5284	0.4049	1.5679	0.3975	0.8568	0.4198	0.3753	0.484	0.4074	0.3877	0.5185	1.2914
V65-C10	232.97	0.7168	1.1031	1.0902	0.6524	0.7554	0.6567	0.6524	0.6911	0.6653	2.7728	0.8027	2.2492	2.7213	0.6825	1.9959	1.0688	0.6267	0.5623	0.6825	1.7899	0.6138	0.8241	3.5197	1.3907	1.6568	0.8971	0.6181	0.9615	1.704	0.764	29.574	0.7597	6.1337	0.6567	1.4851	0.7812	0.7898	0.7597	3.5283	0.734	4.6657	0.6224	0.8327	1.3263	0.7597	0.8241	0.8198	2.6441
V65-C11	255.41	0.6617	0.8379	1.2646	0.5912	0.4581	0.5403	0.599	0.5677	0.6499	6.4367	0.7008	1.6561	1.5974	0.5207	1.0689	1.1002	0.6969	0.5755	0.6538	0.9671	0.5951	0.6656	2.2826	1.2685	1.249	0.6578	0.6891	0.5325	1.7619	0.7909	39.9551	0.6538	8.1515	0.6617	1.8911	0.6225	0.7596	0.5912	3.8056	0.646	2.9521	0.6578	0.7008	0.8144	0.6343	0.7322	0.7791	2.8151
V65-C12	365.74	0.6863	0.4949	0.864	0.4812	0.3855	0.432	0.4894	0.4457	0.4047	3.6201	0.5961	2.5209	0.6753	0.484	0.7464	0.7847	0.4757	0.4402	0.7437	0.9597	0.4347	0.6398	3.8743	1.2468	1.2386	0.5906	0.3992	0.5386	1.173	0.5906	19.0136	0.473	4.536	0.5277	1.1648	0.555	0.5086	0.5222	2.4088	0.4976	1.7964	0.4675	0.4867	0.6562	0.5824	0.5168	0.5605	1.8374
V65-D01	256.58	0.5301	9.1746	0.8263	0.5534	0.495	0.5262	0.6002	0.6976	0.5262	0.9549	2.8997	2.1514	0.7132	0.534	0.6899	0.8496	0.5573	0.5417	0.721	0.99	0.6158	0.8341	2.9699	1.1069	1.1303	0.6236	0.5924	3.0517	1.1537	0.7327	19.5848	0.6041	4.3574	0.6236	1.0991	0.6431	0.6314	0.5924	3.6909	0.6626	1.2628	0.7873	1.2628	0.6976	0.6041	0.7288	0.6899	1.4499
V65-D02	330.44	0.6264	0.5175	0.811	0.4963	0.4751	0.466	0.4237	0.3934	0.4388	2.1426	0.5871	1.2105	1.156	0.4721	0.8353	0.6264	0.5538	0.4418	0.4782	1.5313	0.5296	0.575	1.8581	0.8837	0.9412	0.581	0.4358	0.5417	0.9896	0.5901	15.2131	0.5629	3.1504	0.5689	1.0047	0.5962	0.457	0.463	1.4405	0.5054	1.2347	0.4993	0.4993	0.7142	0.572	0.5266	0.5992	1.4314
V65-D03	305.2	0.6062	0.5767	0.8552	0.4423	0.4456	0.4423	0.5767	0.4816	0.4751	2.3493	0.5963	1.0845	0.557	0.4718	0.7143	0.77	0.616	0.4784	0.5406	0.96	0.4685	0.6225	1.92	0.8552	1.0419	0.5308	0.4161	0.5898	1.1271	0.6782	14.0956	0.5374	3.021	0.5242	1.019	0.6225	0.6422	0.5341	1.4482	0.5242	2.2674	0.652	0.5898	0.7241	0.5505	0.557	0.6717	1.4318
V65-D04	292.79	0.707	0.5191	0.6933	0.5874	0.5191	0.567	0.5772	0.4747	0.4918	2.4283	0.7411	1.0929	0.9802	0.485	0.7548	0.7104	0.5738	0.4918	0.4986	1.3422	0.5635	0.567	1.6838	0.7787	0.8778	0.543	0.5294	0.5874	0.9017	0.584	12.2544	0.5055	2.804	0.5635	0.9222	0.584	0.543	0.5738	1.0212	0.4782	1.3525	0.6079	0.5977	0.6114	0.5055	0.4884	0.6489	1.0929
V65-D05	335.68	0.7686	0.5779	0.849	0.5154	0.4826	0.4022	0.5303	0.4945	0.4737	2.8748	0.6882	0.5988	0.4409	0.4975	0.7209	0.8133	0.4469	0.4647	0.4111	0.6613	0.5005	0.5422	0.6941	0.5362	0.566	0.4558	0.4558	0.5899	0.7835	0.5511	18.0114	0.4886	3.7685	0.432	1.0963	0.4915	0.4647	0.432	1.0308	0.4379	0.8222	0.5333	0.4826	0.4856	0.426	0.5094	0.6047	1.4597
V65-D06	236.09	0.7158	0.8598	1.2749	0.5845	0.6226	0.5676	0.5803	0.7031	0.6396	4.3712	0.6989	1.6392	0.8217	0.5506	0.9064	0.9615	0.7709	0.6565	0.6057	1.5545	0.7201	0.7328	2.2576	1.1097	1.1055	0.5422	0.6692	0.6438	1.2029	0.7921	31.454	0.6735	6.273	0.7243	1.9908	0.6608	0.5845	0.6396	2.372	0.6777	2.8082	0.7074	1.0123	1.0039	0.7878	0.7878	0.8556	2.5075
V65-D07	267.69	0.7434	1.1991	0.9638	0.579	0.5865	0.5491	0.5678	0.5118	0.4782	3.8701	0.7845	2.1031	0.7733	0.5902	0.9264	1.1804	0.6836	0.6201	0.7509	1.285	0.6276	0.6425	3.3919	1.0759	1.3373	0.6388	0.508	0.8667	1.5167	0.7994	26.1006	0.65	5.6296	0.6238	1.6399	0.6313	0.7546	0.6351	2.8465	0.5977	3.8402	0.5342	0.6948	1.0198	0.6238	0.8928	0.6463	2.4244
V65-D08	212.56	0.6257	0.7104	1.2843	0.6728	0.6257	0.6492	0.6539	0.7104	0.668	2.0512	0.7245	2.07	0.988	0.6586	0.955	1.2185	0.6116	0.7292	0.7763	1.3973	0.7857	0.8515	2.8792	1.0962	1.4631	0.7904	0.701	0.6539	1.5901	1.0773	35.4582	0.7339	7.2074	0.875	1.943	0.8656	0.7951	0.6633	3.9095	0.8045	4.427	0.8139	0.7339	1.0538	0.6822	0.9597	1.0209	2.9074
V65-D09	323.21	0.7023	0.5012	0.6497	0.4579	0.4393	0.3898	0.6559	0.396	0.5322	3.6107	0.6343	1.086	1.0117	0.526	1.1262	0.6931	0.495	0.4703	0.6064	0.69	0.5322	0.6281	1.6367	0.7642	0.8385	0.5724	0.4919	0.5353	0.9127	0.4734	11.2374	0.4424	2.6701	0.5569	0.9746	0.5631	0.4919	0.4827	1.2902	0.4981	1.0643	0.4919	0.5507	0.6064	0.5384	0.5167	0.6126	1.0458
V65-D10	353.34	0.4075	0.9424	0.8858	0.4953	0.4104	0.416	0.4585	0.4245	0.3906	2.3292	2.0971	1.9443	0.8207	0.4415	20.4107	1.4066	0.5236	0.5009	0.5519	1.0528	0.4981	0.6	2.5329	1.0471	1.1151	0.5038	0.4443	1.8735	1.5339	0.5972	20.3315	0.5122	4.347	0.4415	1.2085	0.5292	0.5943	0.4953	2.4141	0.4075	1.9018	0.4726	0.5207	0.7811	0.5547	0.5632	0.5802	1.8622
V65-D11	211.57	0.7279	0.9453	1.0871	0.7515	0.6995	0.7846	0.8697	0.8177	0.7421	3.994	0.761	2.1128	0.8555	0.6334	0.9217	1.1958	0.6523	0.6901	0.8744	1.3376	0.7374	0.9548	3.4126	1.5929	1.6827	0.7184	0.5956	0.8839	1.5314	0.865	20.3765	0.7846	4.1973	0.5908	1.3282	0.6523	0.8697	0.6995	3.3465	0.7374	3.4079	0.7137	0.6995	1.158	0.7657	0.7893	0.8224	2.5193
V65-D12	373.38	0.4848	0.4687	0.782	0.4312	0.3669	0.4285	0.4714	0.3669	0.3589	1.7623	0.4982	2.4452	0.6481	0.4098	0.6937	0.6776	0.4392	0.3857	0.6696	0.8624	0.3991	0.7419	4.1808	1.0713	1.2829	0.4526	0.4741	0.4821	1.007	0.4526	18.4183	0.5035	4.2343	0.4312	1.3043	0.616	0.624	0.4874	2.7077	0.5196	1.623	0.5705	0.4821	0.6187	0.4607	0.5357	0.6696	1.8882
V65-E01	254.96	0.5609	23.7921	0.9531	0.7021	0.5452	0.5217	0.5295	0.506	0.5138	1.7885	0.7413	1.6081	0.7688	0.6276	0.9335	0.9649	0.6158	0.6276	0.7099	1.31	0.5609	0.8197	2.5887	0.8472	0.9923	2.216	2.7926	0.855	1.3179	0.7335	21.4898	0.6236	4.2281	0.5609	1.2473	0.706	0.6785	0.655	1.5846	0.5766	1.867	0.5726	0.8315	1.0708	0.6432	0.7648	0.7021	1.9415
V65-E02	245.82	0.8583	0.7404	0.9194	0.5614	0.5939	0.5166	0.6387	0.5207	0.5614	5.4918	0.8014	1.6272	0.9234	0.5899	0.8868	0.9682	0.537	0.6265	0.7282	1.4767	0.5655	0.6875	2.3269	0.9682	0.9112	0.6021	0.5492	0.7689	1.2367	0.7322	21.0885	0.5899	4.0761	0.5858	1.2977	0.6387	0.6061	0.5736	1.8265	0.6102	1.7086	0.5777	0.6387	0.9275	0.6346	0.7851	0.8299	1.8103
V65-E03	294.28	0.6422	0.5131	0.785	0.4553	0.4078	0.4214	0.4791	0.4486	0.4282	1.7263	0.6185	1.1214	0.7646	0.5165	0.6762	0.6592	0.4791	0.4621	0.5403	0.7306	0.4927	0.6083	1.7025	0.8325	0.8937	0.5573	0.4859	0.5505	0.9685	0.6117	12.6954	0.4384	2.7729	0.5199	0.8801	0.5709	0.5471	0.5233	1.3796	0.5777	0.9889	0.5199	0.6355	0.6694	0.4859	0.4825	0.5063	1.2981
V65-E04	349.47	0.6696	0.7726	1.053	0.5322	0.3748	0.4464	0.4607	0.4292	0.3977	3.7113	0.7354	1.837	0.5694	0.4521	0.8642	1.0215	0.5351	0.5036	0.578	1.0158	0.4922	0.598	3.0417	0.95	1.3535	0.5666	0.4149	0.6495	1.2791	0.6696	28.1394	0.475	5.8001	0.475	1.4679	0.495	0.6238	0.4607	3.8515	0.6009	2.4952	0.5551	0.5751	0.8642	0.4578	0.5723	0.7182	2.727
V65-E05	380.01	0.471	0.4	0.6684	0.3684	0.4368	0.4263	0.4842	0.371	0.4026	1.9052	0.4947	1.3815	0.6526	0.4395	0.671	0.6789	0.4105	0.4289	0.5974	0.7395	0.4158	0.5631	2.2605	0.7184	0.9421	0.4789	0.4368	0.521	0.9421	0.5947	17.2232	0.4737	3.6736	0.4816	1.1342	0.4553	0.4974	0.4631	1.8263	0.45	1.0289	0.4131	0.421	0.5526	0.4474	0.3868	0.6289	1.5026
V65-E06	316.51	0.9763	0.7077	0.7298	0.5087	0.5497	0.436	0.6824	0.455	0.5371	9.4247	0.8941	1.1027	0.5813	0.5213	0.8404	0.7962	0.4834	0.4518	0.4802	0.9605	0.5024	0.6635	1.7093	0.8467	1.1595	0.6698	0.5339	0.7646	0.9415	0.6382	12.9664	0.5118	3.0552	0.5087	0.8531	0.575	0.5245	0.5245	1.823	0.5845	1.1627	0.5466	0.6666	0.7267	0.515	0.5055	0.6003	1.3365
V65-E07	271.83	1.0337	0.6511	0.9087	0.5812	0.6217	0.5518	0.6695	0.5555	0.5629	4.1386	0.9234	0.6585	1.0484	0.6144	0.8719	0.7725	0.6364	0.5187	0.596	1.6922	0.6033	0.5702	0.8498	0.7946	0.9307	0.6401	0.5334	0.5996	1.0227	0.6806	12.254	0.5334	2.4905	0.5334	0.9675	0.5923	0.5702	0.5555	1.1919	0.5408	1.7548	0.6327	0.71	0.6548	0.5334	0.4966	0.596	1.2324
V65-E08	351.01	0.5014	0.5043	0.8604	0.4558	0.4017	0.51	0.5356	0.4473	0.3988	1.6267	0.4473	1.0228	0.7094	0.3818	0.8347	0.6553	0.4045	0.3846	0.4188	0.5812	0.4929	0.4758	1.6068	0.7151	0.8404	0.4701	0.4188	0.4701	0.8775	0.5185	18.555	0.5128	3.94	0.5498	1.151	0.5384	0.5612	0.4729	1.772	0.5299	1.1538	0.5498	0.5242	0.4758	0.3761	0.5014	0.6837	1.547
V65-E09	428.68	0.5505	0.4689	1.0287	0.5365	0.3429	0.3546	0.4316	0.3452	0.3476	4.0123	0.5482	0.9238	0.7511	0.3896	0.9751	0.7745	0.4689	0.4129	0.4246	0.7861	0.4362	0.4082	1.311	0.7068	0.7931	0.4292	0.3779	0.4246	1.0007	0.5295	27.0085	0.5435	5.5683	0.4292	1.5209	0.5109	0.4665	0.4782	2.3957	0.4712	0.9028	0.5085	0.4012	0.5552	0.3452	0.5109	0.6042	1.7939
V65-E10	403.84	0.4358	0.3194	0.78	0.4309	0.3492	0.4086	0.4309	0.4383	0.3442	1.825	0.4507	1.352	0.4606	0.3739	0.8791	0.6488	0.421	0.3937	0.4655	0.5745	0.4482	0.4358	2.0181	0.6389	0.8097	0.3912	0.3368	0.4012	0.8716	0.5621	20.4067	0.4432	4.5365	0.4383	1.253	0.4804	0.4655	0.369	1.6318	0.4111	0.8147	0.4581	0.3516	0.4754	0.4111	0.4234	0.4829	1.5526
V65-E11	264.75	0.5024	0.6383	1.084	0.5137	0.5099	0.4948	0.491	0.5099	0.5401	2.8895	0.661	1.152	0.6459	0.4986	0.8687	1.0765	0.5364	0.5552	0.6346	0.8839	0.5892	0.6648	1.6884	0.8612	1.1445	0.5628	0.5175	0.6346	1.1596	0.8574	34.8253	0.6648	7.2899	0.6383	2.0774	0.5779	0.695	0.491	2.5042	0.5703	2.1454	0.5817	0.6459	0.8008	0.6006	0.6119	0.8423	2.7082
V65-E12	347.8	0.6814	0.506	0.7706	0.4428	0.5348	0.4773	0.4342	0.414	0.4428	2.3491	0.5003	1.8948	1.4319	0.4629	0.7332	0.7361	0.4572	0.4917	0.5952	1.8401	0.6038	0.5549	2.9212	1.0782	1.0207	0.4744	0.4658	0.5434	1.0466	0.5722	16.8833	0.5233	3.4416	0.5118	1.2018	0.5607	0.5405	0.5175	1.6274	0.5434	1.4692	0.4342	0.5089	0.6556	0.4859	0.5319	0.4888	1.4635
V65-F01	135.86	1.0672	22.2354	1.001	1.001	1.1188	1.0525	1.082	1.1629	1.0378	0.9127	4.5192	1.5383	1.0599	1.0599	0.9274	1.0672	1.0304	0.9348	1.0452	1.4426	1.001	1.104	1.7297	1.5898	1.5309	0.9863	1.1629	6.2783	1.0231	1.104	5.8588	0.9348	2.0462	1.0157	1.1482	0.92	1.0157	1.1261	5.2773	1.1114	2.2081	0.8612	2.8705	1.0525	0.898	1.3028	1.0304	1.185
V65-F02	224.6	0.6456	7.5288	0.8059	0.6278	0.6322	0.5966	0.6011	0.7613	0.5387	0.8637	2.3508	1.2199	0.935	0.6011	0.8459	0.7302	0.7213	0.6322	0.6055	0.8548	0.6857	0.5877	1.398	1.0329	1.1531	0.7524	0.6723	3.2413	0.984	0.6634	12.6267	0.61	2.9296	0.6189	0.8816	0.6367	0.6144	0.6545	3.5218	0.7791	2.796	0.8726	1.496	0.8014	0.6767	0.7569	0.7391	1.3312
V65-F03	266.74	0.5773	3.4641	1.016	0.5923	0.5136	0.4949	0.4836	0.6261	0.4649	2.4181	1.0685	1.5258	0.6411	0.5211	1.106	0.9935	0.6148	0.5736	0.6373	1.0497	0.6861	0.6411	2.1369	1.0385	1.3084	0.5886	0.6298	1.5034	1.3496	0.7423	27.3828	0.7236	5.4961	0.5361	1.5333	0.6186	0.6373	0.5773	2.9917	0.6598	2.5193	0.6448	0.8285	0.7723	0.5624	0.6073	0.6523	2.1369
V65-F04	342.82	0.6184	0.5192	0.7759	0.455	0.4346	0.42	0.4492	0.3734	0.3675	1.4118	0.5805	1.0063	0.563	0.4055	0.6767	0.7351	0.3967	0.458	0.4725	0.5746	0.4492	0.5105	1.4293	0.5571	0.703	0.455	0.4259	0.4667	0.9655	0.5221	18.1755	0.5396	3.8825	0.5163	1.1989	0.5338	0.6213	0.4375	1.1989	0.4784	0.7555	0.5163	0.4988	0.49	0.4696	0.5455	0.598	1.266
V65-F05	325.51	0.5745	0.7158	1.1367	0.6544	0.5038	0.4854	0.5407	0.6236	0.5499	4.0337	0.596	1.6129	0.6175	0.5161	1.3087	1.0906	0.6482	0.51	0.51	0.9677	0.5868	0.6267	2.685	1.0169	1.4562	0.6144	0.5038	0.6974	1.2473	0.6974	29.4003	0.6267	6.3532	0.5806	1.6958	0.5468	0.6206	0.5069	3.45	0.5376	2.6728	0.5683	0.5622	0.894	0.51	0.553	0.6513	2.6912
V65-F06	295.58	0.8255	0.6428	0.7984	0.4872	0.4872	0.5075	0.5345	0.4973	0.5616	3.2106	0.7138	1.042	1.0116	0.5142	0.8086	0.6327	0.5345	0.5075	0.5109	1.4378	0.5582	0.5988	1.6374	0.8661	0.8255	0.5718	0.5007	0.6157	1.0488	0.6732	14.9231	0.609	3.126	0.5481	0.971	0.6428	0.5244	0.5142	1.3397	0.5041	1.4446	0.4533	0.477	0.6496	0.5041	0.7308	0.6056	1.3769
V65-F07	275.62	0.5587	0.7256	0.9615	0.5878	0.5478	0.4825	0.5152	0.5551	0.5406	3.2	0.722	0.878	0.6531	0.6385	1.1537	0.9324	0.5914	0.5261	0.5696	0.8163	0.5732	0.9977	1.1755	0.7692	0.9433	0.566	0.7184	0.6494	0.9506	0.7474	21.9465	0.6059	4.4372	0.5986	1.1102	0.6095	0.624	0.6095	2.3002	0.5406	1.288	0.6277	0.5878	0.6095	0.6712	0.5442	0.6821	2.01
V65-F08	398.49	0.4944	0.5094	0.9235	0.4266	0.4567	0.4141	0.4994	0.4241	0.4116	2.2585	0.5446	1.6562	0.6299	0.4366	1.0766	0.7779	0.5169	0.4642	0.537	0.7855	0.4793	0.5797	2.4994	0.8633	0.9812	0.5671	0.4417	0.4994	1.0766	0.5772	21.4408	0.5446	4.4668	0.4893	1.315	0.4517	0.6048	0.5295	2.0778	0.532	1.4028	0.4743	0.5195	0.66	0.5295	0.5245	0.655	1.7541
V65-F09	301.34	0.5177	1.7356	0.8263	0.9856	0.4347	0.4845	0.5011	0.4513	0.4945	1.6029	7.1083	2.3827	0.6372	0.5243	111.413	4.7953	0.7599	0.4878	0.7533	0.8695	0.5509	0.6836	3.0564	0.8894	1.2146	0.5841	0.531	8.2466	3.8694	0.7964	24.0395	0.5509	5.2333	0.5608	1.4535	0.594	0.7732	0.4945	2.7477	0.6272	2.104	0.6305	1.0951	0.9922	0.5111	0.6007	0.7666	2.2997
V65-F10	342.47	0.6599	0.5373	0.7504	0.5022	0.4117	0.403	0.5927	0.4176	0.3825	2.7447	0.6219	1.2293	0.6687	0.4497	1.3461	0.9899	0.4818	0.3913	0.5577	0.9665	0.5197	0.4759	1.6965	0.7417	0.9461	0.5139	0.4292	0.5665	1.1913	0.5489	19.768	0.5139	4.0208	0.5343	1.1125	0.6307	0.5314	0.4438	1.6527	0.5081	1.2351	0.5285	0.5197	0.6424	0.5081	0.5577	0.5781	1.5242
V65-F11	350.54	0.5677	0.5278	0.95	0.4507	0.3994	0.3823	0.4422	0.4393	0.4222	1.9769	0.542	1.3864	0.5392	0.5135	0.8216	1.1496	0.4365	0.4992	0.4964	1.1183	0.5477	0.5477	1.9598	0.8473	0.9072	0.465	0.5278	0.5991	1.2638	0.6219	26.3933	0.5021	5.4972	0.4678	1.7687	0.4992	0.5192	0.4222	3.4717	0.5677	2.3307	0.5021	0.4707	0.5392	0.485	0.5078	0.6019	2.131
V65-F12(pET28)	353.92	0.4493	0.9239	1.02	0.5001	0.4634	0.4267	0.5397	0.421	0.4153	2.7633	0.7205	1.0737	0.4945	0.4267	1.0313	1.0341	0.534	0.616	0.5114	1.0257	0.5142	0.6131	1.6077	1.0511	1.6755	0.5792	0.8957	0.842	1.5229	0.7233	27.6532	0.4775	5.6284	0.5792	1.4354	0.5623	0.6809	0.5679	2.7351	0.6103	2.3932	0.5708	0.6301	0.859	0.5086	0.6612	0.7205	3.5601
V65-G01	317.4	0.5262	0.5577	0.7246	0.4726	0.5198	0.4915	0.4915	0.4978	0.4694	3.0939	0.6144	1.7297	0.627	0.4631	0.9767	0.8916	0.5009	0.5262	0.6742	0.9074	0.4978	0.6679	2.8576	0.816	0.8475	0.5797	0.6018	0.5482	1.0933	0.5608	16.3516	0.5388	3.7461	0.5451	1.1594	0.5577	0.5482	0.5009	1.2854	0.4789	1.0901	0.4537	0.5388	0.627	0.4726	0.5356	0.5734	1.5091
V65-G02	338.21	0.4317	0.5056	0.8427	0.4583	0.4258	0.3933	0.4139	0.5027	0.4406	2.2117	0.4406	1.7504	0.8279	0.4317	0.8072	0.7185	0.5115	0.4228	0.6653	1.4695	0.55	0.5204	2.5517	0.8456	1.026	0.4849	0.5293	0.4938	1.1117	0.6032	23.1368	0.544	4.6185	0.5381	1.2773	0.5618	0.482	0.4879	1.984	0.4938	0.9255	0.4879	0.4021	0.6771	0.5293	0.482	0.5145	1.8391
V65-G03	333.44	0.6058	0.4499	0.7168	0.3989	0.4679	0.4739	0.5218	0.4379	0.4589	2.2373	0.5218	1.4905	0.9207	0.4589	0.8307	0.6178	0.4529	0.3929	0.5788	0.7768	0.4139	0.4709	2.0724	0.7258	0.8847	0.5098	0.5278	0.5338	0.9537	0.5248	14.8874	0.5728	3.203	0.4739	1.0437	0.4888	0.5308	0.5008	1.5955	0.5188	1.1816	0.6208	0.4978	0.5338	0.4439	0.4829	0.5548	1.3856
V65-G04	355.85	0.4805	0.4609	0.8374	0.5424	0.4328	0.5086	0.562	0.4356	0.5086	1.8913	0.5452	1.6974	0.5817	0.4609	0.7419	0.7082	0.4777	0.4777	0.5564	0.7391	0.4243	0.562	2.4898	0.7981	0.9049	0.6716	0.4384	0.5058	1.0426	0.5845	19.9973	0.4749	4.3389	0.4384	1.3152	0.4834	0.4974	0.4637	1.5821	0.4468	1.391	0.4524	0.4187	0.5564	0.4412	0.4974	0.5564	1.6524
V65-G05	308.1	0.542	0.4349	0.7563	0.4706	0.4544	0.4934	0.4934	0.4122	0.4447	1.7008	0.4739	1.2171	0.7855	0.4479	0.8277	0.7206	0.4869	0.4739	0.5907	0.5972	0.4739	0.5453	1.8598	0.7627	0.7855	0.4836	0.4836	0.5258	0.8342	0.5777	17.4231	0.5063	3.7293	0.5161	1.2042	0.5518	0.4804	0.5063	1.5742	0.5193	0.9867	0.5226	0.5161	0.6491	0.5226	0.5615	0.6329	1.4281
V65-G06	359.4	0.512	0.4841	0.793	0.4452	0.4007	0.4591	0.5787	0.4786	0.3756	1.611	0.4758	1.2576	0.5843	0.4452	0.7262	0.6066	0.4257	0.3756	0.562	0.9321	0.4313	0.5732	1.9616	0.7846	1.0044	0.4452	0.4702	0.4619	1.0684	0.5593	17.3036	0.6066	3.6115	0.5008	0.946	0.5287	0.5899	0.4758	1.8475	0.4758	1.3355	0.4702	0.5231	0.6399	0.4786	0.576	0.5676	1.6416
V65-G07	319.13	0.5922	0.586	0.7364	0.5108	0.4794	0.5076	0.611	0.4732	0.4857	2.1841	0.5703	1.1343	0.5327	0.4888	0.8742	0.7552	0.4544	0.4387	0.5327	0.8178	0.492	0.517	1.9334	0.7395	1.0059	0.6016	0.4011	0.5922	0.9432	0.5515	13.9034	0.517	3.3059	0.5076	1.0121	0.4888	0.611	0.5108	1.6764	0.4669	1.5636	0.5014	0.4982	0.586	0.5515	0.5734	0.5358	1.4602
V65-G08	317.22	0.6336	0.5895	0.9205	0.5044	0.5296	0.413	0.4508	0.4697	0.3814	3.6315	0.6052	0.7282	0.6525	0.4256	0.8953	0.8228	0.4571	0.4981	0.5201	0.7408	0.4729	0.5012	0.9268	0.6841	0.7282	0.5075	0.4918	0.6273	0.8858	0.6021	18.2678	0.5201	3.8616	0.517	1.2294	0.5706	0.5863	0.4729	1.7464	0.5138	1.1506	0.5359	0.5012	0.5863	0.4918	0.4319	0.5737	1.469
V65-G09	339.11	0.6016	0.4571	0.8699	0.5544	0.5455	0.5131	0.5308	0.4276	0.5131	2.8693	0.5367	1.2887	0.522	0.404	0.8906	0.8434	0.4512	0.5279	0.522	0.6281	0.4866	0.5721	1.9728	0.6311	0.8847	0.519	0.4246	0.5043	1.0056	0.6134	20.1322	0.4748	4.3142	0.4541	1.1619	0.519	0.5279	0.4866	2.0023	0.5544	1.4715	0.5072	0.5514	0.5721	0.4689	0.6016	0.6606	1.6838
V65-G10	323.41	0.637	0.5102	0.7545	0.5102	0.4112	0.4638	0.6462	0.3989	0.4607	2.9467	0.6401	0.9647	0.504	0.4391	0.7854	0.8101	0.5071	0.4576	0.5195	0.7792	0.4885	0.6308	1.2832	0.7483	0.7916	0.4916	0.5597	0.4947	0.8905	0.4638	12.9155	0.5442	2.9436	0.5133	1.0884	0.5535	0.5102	0.4793	1.0266	0.4576	1.2275	0.5102	0.4793	0.5318	0.4978	0.4576	0.538	1.1935
V65-G11	310.59	0.8113	0.7566	0.8339	0.5377	0.4894	0.4958	0.5924	0.4733	0.5377	5.0323	0.6504	1.5873	0.5924	0.4862	0.9884	1.0013	0.5023	0.5023	0.5441	0.8532	0.5023	0.6729	2.4437	1.1237	1.0947	0.5119	0.4186	0.6439	1.3522	0.6504	19.1987	0.4926	4.1243	0.4475	1.1076	0.586	0.6471	0.4862	1.6581	0.4958	1.803	0.5023	0.5151	0.6632	0.4604	0.631	0.689	1.7933
V65-G12(WT)	254.16	0.5705	0.5272	1.2472	0.6256	0.5312	0.4682	0.5823	0.543	0.4918	1.5069	0.6295	0.9757	1.0466	0.5193	0.8892	1.3574	0.7003	0.6925	0.5075	2.1915	0.7357	0.7121	1.2	1.0544	1.1371	0.5312	0.6256	0.6138	1.2197	0.7357	32.1838	0.6295	6.2518	0.6728	1.8295	0.7672	0.6964	0.6531	3.4899	0.7397	4.5954	0.6728	0.6885	0.8066	0.6256	0.6413	0.8223	2.4984
V65-H01	273.5	0.6179	0.6618	1.1334	0.691	0.5155	0.5009	0.5228	0.596	0.5302	1.8537	0.5448	1.5722	1.0018	0.5155	0.8117	1.0603	0.6069	0.5192	0.83	1.4954	0.7751	0.6545	2.2961	0.9506	0.9543	0.5411	0.6654	0.5996	1.2102	0.7422	26.0437	0.6801	5.4735	0.5338	1.4698	0.6947	0.5448	0.5046	2.4058	0.6618	2.245	0.5813	0.6033	0.808	0.574	0.713	0.7715	2.0512
V65-H02	226.24	0.6277	2.3294	1.0962	0.6851	0.694	0.6586	0.6453	0.6498	0.5835	1.936	2.104	1.7548	1.0299	0.6232	36.3729	1.989	0.747	0.6719	0.7558	0.9945	0.6719	0.6674	1.9625	1.0476	0.9415	0.8354	1.7415	2.6123	1.7813	0.7293	20.0053	0.7382	4.146	0.6188	1.2818	0.7735	0.6542	0.5923	1.8167	0.6056	1.662	0.6144	1.3923	0.9459	0.7116	0.7205	0.6807	2.0819
V65-H03	293.3	0.5557	0.4841	0.8865	0.5216	0.5148	0.4807	0.4944	0.491	0.45	1.8309	0.6205	2.598	0.7364	0.4739	0.849	0.7501	0.5387	0.5455	0.8149	0.8796	0.4773	0.7228	3.9072	1.0944	1.3501	0.6205	0.5967	0.6342	1.0706	0.5728	19.6316	0.6307	4.3948	0.508	1.3331	0.5455	0.6205	0.6239	2.5912	0.5592	1.3638	0.6512	0.5216	0.6887	0.5421	0.5592	0.6103	1.8445
V65-H04	384.54	0.4577	0.4785	0.6683	0.4317	0.4161	0.4473	0.4551	0.4109	0.3823	2.6083	0.5461	1.7658	0.6319	0.4239	0.7672	0.7359	0.4317	0.4421	0.5149	0.7281	0.4343	0.4967	2.7696	0.7724	0.9284	0.4941	0.4109	0.5071	1.2066	0.5487	17.1817	0.4395	3.854	0.4733	1.0402	0.4421	0.5279	0.4473	1.7398	0.5123	1.3731	0.4213	0.4057	0.6735	0.4447	0.4265	0.5695	1.6045
V65-H05	342.74	0.5544	0.5835	0.6973	0.4756	0.4639	0.4552	0.5339	0.4172	0.4697	1.9198	0.5719	1.2575	0.9424	0.4464	0.9949	0.6448	0.4668	0.4143	0.5135	0.7207	0.4668	0.531	2.0657	0.7673	0.8724	0.5281	0.4522	0.5777	0.8724	0.604	13.5	0.4785	2.8914	0.4552	0.9512	0.4785	0.5368	0.4493	1.5551	0.4522	1.3042	0.4581	0.5135	0.6769	0.4814	0.5281	0.5981	1.2838
V65-H06	219.86	0.7869	0.7914	1.0052	0.7596	0.6504	0.6186	0.7005	0.6595	0.655	4.0799	0.8778	1.3099	0.7687	0.6777	1.0962	1.0188	0.6959	0.6504	0.6641	0.9506	0.7505	0.8187	1.8921	0.8824	1.0507	0.755	0.6914	0.8233	1.3418	0.937	23.4288	0.7232	4.7758	0.8869	1.6374	0.796	0.8051	0.6504	1.8739	0.5958	1.9331	0.7005	0.7778	0.7505	0.6049	0.7641	0.7823	2.0741
V65-H07	336.06	0.7201	0.5594	0.8332	0.4791	0.4225	0.4017	0.5654	0.4017	0.4642	3.8238	0.6427	0.9611	0.6517	0.4642	0.9582	0.9076	0.4821	0.5059	0.485	0.7767	0.4493	0.4821	1.3777	0.7112	0.7737	0.4672	0.4166	0.5624	0.9909	0.5803	17.4167	0.616	3.6065	0.4553	1.1189	0.5326	0.5803	0.4642	1.4045	0.5059	1.1486	0.4285	0.4017	0.5654	0.5475	0.491	0.5922	1.4968
V65-H08	321.43	0.5258	0.4791	0.7653	0.5413	0.4667	0.4729	0.5164	0.5133	0.4636	1.8107	0.5351	1.596	0.5196	0.3858	0.7716	0.672	0.4636	0.4293	0.616	0.756	0.4853	0.6284	2.6693	0.952	1.1387	0.4729	0.4947	0.5102	0.9831	0.5911	16.3364	0.504	3.6898	0.5258	1.2631	0.5382	0.56	0.532	1.9538	0.5009	1.0858	0.5164	0.476	0.6689	0.5382	0.5196	0.6316	1.5524
V65-H09	285.37	0.5151	0.7008	1.2019	0.5782	0.5467	0.5291	0.5747	0.5291	0.4976	3.6339	0.6763	1.7661	1.3106	0.5186	1.4332	1.0372	0.5712	0.5922	0.7079	1.7591	0.6938	0.6728	2.94	1.4367	1.4858	0.6097	0.5432	0.5642	1.5068	0.7359	37.0886	0.7814	8.1964	0.6448	1.8783	0.6378	0.7324	0.6658	2.9821	0.6308	3.4131	0.5537	0.7779	1.0723	0.6658	0.827	0.7324	2.6036
V65-H10	304.8	0.5282	0.5742	0.8333	0.5479	0.4593	0.5249	0.5971	0.456	0.4757	1.4501	0.643	2.2572	0.6496	0.4888	0.7874	0.7513	0.4659	0.4757	0.7218	0.8957	0.4757	0.6955	3.3366	1.1778	1.4534	0.6037	1.2763	0.643	1.145	0.584	15.6858	0.5676	3.481	0.5381	1.2959	0.5413	0.5938	0.5479	2.3655	0.607	2.1752	0.5807	0.607	0.876	0.5446	0.5774	0.5676	1.8602
V65-H11	232.36	0.7058	0.9942	1.0329	0.6542	0.6585	0.6585	0.7445	0.8866	0.5337	4.1832	0.8048	2.4316	1.0286	0.6671	1.2309	1.0415	0.6499	0.6843	0.7532	1.9668	0.7015	0.8435	3.9681	1.5881	1.6612	0.7101	0.538	0.7876	1.7473	0.878	25.5815	0.6413	5.5045	0.6714	1.5278	0.779	0.7402	0.6972	3.0514	0.6929	3.159	0.6542	0.8306	1.1534	0.8866	0.8005	0.8823	2.7329
V65-H12	288.88	0.6127	0.7546	1.0627	0.5746	0.5019	0.4362	0.5435	0.5504	0.4154	3.3232	0.5573	1.3916	0.54	0.4569	0.9727	2.8109	0.5677	0.5054	0.5885	0.5539	0.5469	0.5954	2.0597	4.7702	1.2081	0.5539	0.5816	0.6162	1.0143	0.7027	24.0032	0.5504	5.1856	0.5919	1.4747	0.5712	0.5746	0.495	0.9416	0.8308	1.6512	0.54	0.5919	0.5262	0.5643	0.6404	0.7062	1.8555
[truncated: 158 more columns]

## Sheet: L119
Sample Name	Mean Intensity	m/z 102.17	m/z 104.15	m/z 107.09	m/z 108.11	m/z 110.11	m/z 111.10	m/z 113.13	m/z 114.11	m/z 115.13	m/z 117.18	m/z 118.14	m/z 119.13	m/z 120.11	m/z 121.09	m/z 122.12	m/z 123.09	m/z 124.11	m/z 127.11	m/z 129.10	m/z 130.10	m/z 131.10	m/z 133.13	m/z 135.12	m/z 136.11	m/z 137.11	m/z 138.12	m/z 139.09	m/z 140.11	m/z 144.10	m/z 145.09	m/z 146.10	m/z 146.73	m/z 147.10	m/z 147.77	m/z 148.11	m/z 149.12	m/z 150.13	m/z 151.15	m/z 152.10	m/z 153.10	m/z 155.12	m/z 155.61	m/z 156.12	m/z 160.12	m/z 161.12	m/z 162.11	m/z 163.11	m/z 164.12
L119-A01	420.42	0.509	0.5471	0.8943	0.4281	0.4353	0.4757	0.4234	0.3758	0.3497	2.0361	0.528	2.5712	0.9919	0.4567	0.8254	0.6375	0.4519	0.4115	0.7231	1.4747	0.4995	0.6945	3.9128	1.3867	1.1964	0.5304	0.4163	0.5185	1.332	0.5732	19.2189	0.4543	4.1316	0.4543	1.137	0.5328	0.5566	0.4829	1.6769	0.4234	1.5294	0.4353	0.4496	0.6945	0.5828	0.5352	0.509	1.7387
L119-A02	414.61	0.4124	0.369	0.7694	0.4124	0.4245	0.4004	0.4221	0.3835	0.4004	1.6714	0.4655	2.149	0.574	0.4076	0.6777	0.6512	0.4124	0.4221	0.5571	0.7911	0.3811	0.5427	3.1547	1.1625	1.1673	0.4727	0.4197	0.4366	1.0009	0.5065	17.7104	0.4824	3.9941	0.4269	1.1794	0.4076	0.6391	0.451	1.7148	0.4655	1.5943	0.4148	0.4269	0.5981	0.4583	0.451	0.48	1.5219
L119-A03	467.45	0.4364	0.3401	0.8685	0.353	0.3188	0.3765	0.3487	0.3081	0.3059	2.0024	0.3915	2.657	0.7423	0.3936	0.8215	0.6225	0.3359	0.4065	0.5412	0.6824	0.4621	0.4813	3.9962	1.0397	0.8814	0.4428	0.338	0.368	1.1552	0.5412	25.2242	0.4621	5.806	0.4578	1.382	0.4193	0.5669	0.4728	1.782	0.4	0.9477	0.4664	0.4086	0.5006	0.3787	0.4214	0.4535	1.7948
L119-A04	358.17	0.684	0.6505	0.7762	0.4356	0.4132	0.4048	0.483	0.3965	0.4272	4.1015	0.6394	1.4714	0.7678	0.4188	0.9102	0.7036	0.5305	0.4746	0.483	0.832	0.4188	0.5612	2.3034	0.8739	0.9772	0.5724	0.4635	0.5389	0.8906	0.5975	18.229	0.4579	3.9842	0.4551	1.0526	0.5277	0.6896	0.3797	1.3122	0.4439	1.3793	0.4607	0.5361	0.5584	0.4216	0.4998	0.6114	1.4016
L119-A05	405.07	0.4147	0.4592	0.8517	0.3925	0.4123	0.3728	0.3777	0.3481	0.316	1.7281	0.4073	2.2539	0.669	0.3481	0.6616	0.5209	0.3431	0.4073	0.5332	0.7159	0.3703	0.5234	3.3476	0.8542	0.8764	0.4468	0.3975	0.4641	1.1677	0.5703	20.6408	0.4913	4.5967	0.4493	1.2788	0.474	0.5011	0.3901	1.4022	0.3925	1.0443	0.4839	0.4789	0.4666	0.3777	0.4666	0.6172	1.5306
L119-A06	362.09	0.4529	0.4391	0.8644	0.3977	0.406	0.464	0.4419	0.4364	0.3618	1.6322	0.5247	3.0186	0.7015	0.4419	0.765	0.7457	0.4419	0.4005	0.7098	0.7705	0.475	0.6656	4.7254	1.229	1.1268	0.4916	0.5026	0.4723	1.1489	0.6048	22.8757	0.4999	4.9684	0.4585	1.2842	0.6021	0.5993	0.4916	1.809	0.5247	1.3091	0.4667	0.4115	0.58	0.4391	0.475	0.5441	1.8614
L119-A07	361.66	0.4839	0.4645	0.8959	0.4286	0.3982	0.4037	0.3926	0.3899	0.3512	1.6424	0.4922	1.9217	0.7189	0.4037	0.6747	0.7272	0.4562	0.4728	0.5475	1.0314	0.4562	0.6055	2.9835	0.8212	0.7991	0.412	0.4701	0.4728	1.1447	0.5779	19.408	0.4867	4.3273	0.506	1.1281	0.5751	0.5392	0.4175	1.2775	0.3512	1.3936	0.4756	0.4313	0.5751	0.4756	0.5198	0.6415	1.6231
L119-A08	371.62	0.514	0.5328	0.9015	0.4306	0.4924	0.4413	0.4009	0.4171	0.3687	2.8524	0.6996	2.9304	1.297	0.4602	0.9015	0.7346	0.4951	0.4413	0.662	0.9714	0.4332	0.6351	4.4858	1.141	1.1706	0.5786	0.3902	0.5516	1.1652	0.5113	22.7008	0.4736	5.1397	0.5005	1.3428	0.5893	0.5355	0.5786	2.4514	0.4682	1.5742	0.4602	0.4413	0.818	0.4628	0.5597	0.6431	2.1662
L119-A09	344.05	0.4912	0.4621	0.7673	0.4592	0.468	0.5232	0.5464	0.4185	0.4127	1.4475	0.5522	1.9038	0.5406	0.3953	0.7121	0.6743	0.4185	0.3749	0.6336	0.8429	0.4389	0.59	3.3425	0.9097	0.9097	0.465	0.3953	0.465	0.8952	0.6075	18.0729	0.4854	3.9587	0.4563	1.2789	0.5261	0.5232	0.4534	1.3312	0.4738	1.1742	0.5232	0.4825	0.5581	0.4999	0.5319	0.5813	1.6189
L119-A10	313	0.6326	0.6294	1.0351	0.5942	0.4441	0.4633	0.4856	0.5048	0.5016	2.7923	0.5687	2.329	0.7508	0.476	0.8658	0.8882	0.5048	0.4856	0.738	1.0575	0.6549	0.6326	3.9392	1.2172	1.2747	0.5591	0.5176	0.5879	1.1789	0.5815	21.8847	0.4505	4.5974	0.5208	1.2588	0.5815	0.5815	0.5495	2.2428	0.5367	2.492	0.5591	0.5591	0.7987	0.639	0.6805	0.7188	2.1501
L119-A11	312.04	0.798	0.4935	0.8749	0.5929	0.5063	0.5192	0.5768	0.4775	0.4455	3.0124	0.6858	2.0574	0.7499	0.4102	0.8621	0.8172	0.5384	0.4967	0.7627	1.0127	0.4935	0.6762	3.9097	1.0063	1.3524	0.5865	0.4711	0.5416	1.1953	0.548	17.9783	0.4711	4.0571	0.5736	1.2626	0.4967	0.5865	0.4935	1.6055	0.5512	2.2144	0.5897	0.564	0.7884	0.6089	0.673	0.6281	1.7145
L119-A12	299.03	0.6488	0.6187	0.7725	0.5551	0.4983	0.6321	0.5484	0.5819	0.4682	1.8962	0.6053	3.3743	1.3042	0.5618	0.8327	0.729	0.5284	0.4782	0.7959	1.4781	0.6387	0.7959	5.2069	1.6788	1.8694	0.6454	0.5284	0.6153	1.5049	0.6889	18.2928	0.6187	4.2505	0.6086	1.3143	0.6622	0.7157	0.6688	2.9095	0.6555	3.9395	0.5518	0.6856	1.1337	0.6989	0.6989	0.6822	2.2172
L119-B01	430.86	0.5454	0.4967	0.8146	0.434	0.4131	0.318	0.376	0.4178	0.3922	2.9151	0.5292	0.5988	0.7566	0.3064	0.9168	0.6011	0.3481	0.3969	0.3435	0.4967	0.3713	0.3992	0.817	0.6127	0.5408	0.4224	0.3876	0.4735	0.9214	0.5245	20.8836	0.4015	4.4538	0.434	1.1349	0.3853	0.4851	0.311	0.8332	0.3969	0.7473	0.4503	0.376	0.4224	0.3574	0.3806	0.4897	1.2069
L119-B02	374.17	0.4891	0.6628	0.8258	0.4276	0.3635	0.3688	0.3394	0.3608	0.3635	1.3336	0.5292	0.5372	0.5158	0.3902	0.8178	0.6735	0.3581	0.3929	0.3448	0.5799	0.4624	0.5238	0.6788	0.588	0.5586	0.4436	0.604	0.4597	0.9194	0.5719	21.3566	0.6147	4.3804	0.4276	1.2267	0.4677	0.5479	0.3849	0.7777	0.3661	0.5292	0.465	0.457	0.3955	0.3287	0.433	0.5719	1.4111
L119-B03	343.19	0.542	0.813	0.8975	0.405	0.405	0.4109	0.574	0.44	0.4429	3.7443	0.6265	0.9995	0.9266	0.4546	1.1859	0.7576	0.4983	0.4458	0.4633	0.8042	0.475	0.5507	1.2092	0.8363	0.8304	0.4895	0.4371	0.6964	1.1539	0.6527	22.9262	0.5536	4.7962	0.5682	1.2821	0.5682	0.6003	0.5187	2.1912	0.4837	1.3375	0.5274	0.507	0.5565	0.4983	0.5303	0.5711	1.827
L119-B04	385.73	0.5107	0.5081	0.9177	0.4278	0.3811	0.4485	0.4018	0.3915	0.3707	2.1129	0.5522	1.5762	0.4511	0.3189	0.8659	0.6715	0.3941	0.363	0.477	0.5885	0.477	0.5781	2.1155	0.8478	0.897	0.4459	0.477	0.4485	1.0526	0.5626	25.5103	0.4718	5.6828	0.4667	1.5451	0.4848	0.5755	0.4563	1.4492	0.3992	0.9722	0.4355	0.3889	0.5704	0.4252	0.5211	0.5626	1.9314
L119-B05	417.44	0.4959	0.5103	0.8744	0.4264	0.4408	0.3977	0.3809	0.4072	0.3258	1.9596	0.5031	1.3798	1.2936	0.5055	0.7163	0.6181	0.3857	0.3785	0.424	0.9367	0.3545	0.448	1.95	0.9199	0.8792	0.4671	0.4025	0.5198	1.1499	0.5869	21.6821	0.448	4.5971	0.4408	1.1882	0.436	0.5174	0.4144	1.8398	0.3881	1.3199	0.4647	0.4144	0.6324	0.4048	0.539	0.5198	1.5403
L119-B06	360.37	0.4884	0.4357	0.8686	0.419	0.4357	0.4523	0.4384	0.3385	0.3663	1.2682	0.4495	1.6539	0.6493	0.4218	0.6382	0.7048	0.4218	0.4357	0.5439	0.8131	0.4079	0.5106	2.7333	0.8658	0.777	0.4495	0.4135	0.394	1.0545	0.5772	22.2801	0.53	4.6064	0.5356	1.3042	0.6077	0.5383	0.4551	1.2571	0.4246	1.4097	0.4412	0.5023	0.6382	0.4745	0.5078	0.5855	1.7177
L119-B07	287.99	0.6389	0.4896	0.9896	0.5556	0.4792	0.4757	0.559	0.4931	0.4618	1.698	0.5764	2.1945	0.7118	0.5174	0.816	0.7952	0.5521	0.5243	0.7153	0.75	0.5174	0.6111	3.1842	1.0382	1.073	0.5521	0.5486	0.5521	1.2466	0.6146	21.3203	0.6528	4.646	0.6146	1.5105	0.5382	0.7049	0.6181	1.6633	0.566	1.4584	0.6354	0.5417	0.7396	0.5556	0.6111	0.9167	1.9758
L119-B08	360.02	0.5389	0.575	0.8527	0.5777	0.4389	0.45	0.4527	0.4416	0.3916	2.1193	0.5722	1.5638	0.575	0.3805	0.9166	0.8055	0.5527	0.4972	0.5639	1.0027	0.5916	0.5694	2.2082	0.8138	0.8999	0.5111	0.4889	0.5666	1.1194	0.5944	18.7821	0.5139	4.3636	0.4944	1.1583	0.4777	0.5389	0.4777	1.3832	0.4694	1.4443	0.5139	0.5027	0.5722	0.5277	0.5083	0.5139	1.6527
L119-B09	373.14	0.4958	0.6164	1.0077	0.4422	0.3672	0.4288	0.3645	0.3779	0.3752	2.8971	0.5521	1.0345	0.4395	0.4449	0.9594	0.8576	0.4529	0.4663	0.4154	0.5708	0.3993	0.5172	1.4794	0.6914	0.7102	0.4717	0.41	0.603	1.064	0.595	22.6942	0.461	4.9875	0.4288	1.3105	0.4851	0.5333	0.41	1.2784	0.4074	1.139	0.4824	0.4449	0.4717	0.3698	0.4797	0.5655	1.7876
L119-B10	349.3	0.4924	0.4495	0.8703	0.4266	0.375	0.481	0.3979	0.3894	0.3979	1.3398	0.4581	1.6719	0.6785	0.4094	0.7272	0.7443	0.4724	0.481	0.5812	0.9533	0.4867	0.5239	2.6625	0.9619	0.9762	0.5382	0.4896	0.4437	0.9276	0.5783	21.6547	0.5039	4.4861	0.5296	1.2396	0.6012	0.6012	0.5697	1.4457	0.4896	1.3685	0.5726	0.481	0.6728	0.438	0.5096	0.6928	1.6776
L119-B11	323.93	0.6112	0.4908	0.6298	0.4445	0.531	0.4785	0.6884	0.4044	0.4445	1.8738	0.5186	1.2873	0.5773	0.4661	0.7779	0.7069	0.4816	0.5001	0.6143	0.8736	0.4754	0.5649	2.4882	0.8922	1.0681	0.5001	0.4692	0.5402	0.9879	0.5773	14.9197	0.497	3.1581	0.4908	1.0527	0.5557	0.5804	0.5557	1.6794	0.5371	2.1054	0.5618	0.5248	0.7038	0.5248	0.6051	0.6606	1.5682
L119-B12	289.8	0.5694	0.5832	0.7246	0.5418	0.5245	0.5556	0.6004	0.5141	0.5211	2.0877	0.7902	2.0877	0.7143	0.5176	0.8489	0.666	0.5659	0.4969	0.7419	1.049	0.4796	0.7108	3.8682	1.4217	1.4355	0.6625	0.4727	0.6315	1.1629	0.6763	11.4217	0.5141	2.8054	0.5418	0.911	0.6453	0.6142	0.6039	2.1153	0.6004	3.1229	0.5452	0.6729	0.9248	0.5728	0.666	0.5659	1.7978
L119-C01	444.82	0.4496	0.4766	0.852	0.3552	0.4406	0.3372	0.3979	0.3327	0.308	1.7198	0.4496	1.2252	1.0454	0.4114	0.6812	0.5418	0.3822	0.3552	0.4586	1.5714	0.4811	0.5126	1.7423	0.897	0.7329	0.4339	0.326	0.5058	0.8678	0.4968	16.0851	0.5036	3.4418	0.4069	0.9487	0.4339	0.4766	0.3687	1.2185	0.3597	1.1061	0.4092	0.4047	0.4811	0.3709	0.4204	0.4541	1.3466
L119-C02	393.36	0.4957	0.5262	0.7194	0.4373	0.3966	0.4449	0.4525	0.3152	0.3991	2.1456	0.6559	1.4058	0.6635	0.4144	0.8161	0.7042	0.4474	0.4729	0.4881	0.9635	0.5084	0.5669	2.1329	0.9737	0.872	0.4678	1.1211	0.6025	1.2864	0.572	17.0939	0.394	3.671	0.394	0.9889	0.4678	0.5618	0.3839	1.355	0.3712	1.4719	0.5491	0.5567	0.5618	0.3712	0.3991	0.4932	1.3982
L119-C03	362.69	0.4301	0.5983	0.7472	0.3998	0.4136	0.4163	0.4632	0.4053	0.4522	2.021	0.6038	1.5192	0.4687	0.4026	0.7555	0.7307	0.5377	0.375	0.4963	0.9099	0.4687	0.5735	2.2609	1.1222	1.1525	0.5404	0.4412	0.5239	1.1801	0.568	17.1305	0.4163	3.8049	0.4908	0.9981	0.5266	0.5845	0.5266	1.7122	0.4329	1.9273	0.6149	0.5239	0.6617	0.4191	0.5487	0.5597	1.6212
L119-C04	376.47	0.4223	0.4648	0.8792	0.4595	0.3719	0.4011	0.3931	0.4064	0.3559	1.445	0.4356	1.0439	0.502	0.3958	0.603	0.6056	0.4383	0.3241	0.3878	0.5684	0.3772	0.5525	1.3653	0.672	0.7836	0.4781	0.4117	0.4356	0.9084	0.5817	21.4814	0.5605	4.5183	0.4967	1.3919	0.4941	0.5233	0.4038	1.2299	0.433	0.8102	0.518	0.4888	0.4542	0.3958	0.4463	0.5658	1.3733
L119-C05	401.05	0.399	0.4089	0.8179	0.4089	0.3915	0.4089	0.399	0.3715	0.4064	1.4312	0.4189	1.9773	0.6234	0.3665	0.6408	0.566	0.4289	0.3616	0.4862	0.7755	0.3765	0.4987	2.5284	0.8927	0.8976	0.4538	0.3566	0.5112	1.0921	0.5286	20.6159	0.5361	4.3785	0.4987	1.3465	0.5386	0.6383	0.4463	1.708	0.4613	1.0398	0.4488	0.4987	0.5984	0.4663	0.4812	0.5186	1.733
L119-C06	386.31	0.3702	0.4219	0.7429	0.3909	0.3676	0.4452	0.3624	0.3598	0.2899	1.1442	0.3935	1.8405	0.5151	0.3935	0.6653	0.6161	0.5022	0.3986	0.5669	0.9267	0.4996	0.5773	2.8915	0.9914	1.315	0.5048	0.4323	0.4763	1.1856	0.4867	20.2972	0.4297	4.134	0.453	1.2192	0.4634	0.5695	0.5462	2.2935	0.4504	2.0942	0.4918	0.4789	0.7533	0.497	0.5177	0.6057	2.0709
L119-C07	385.82	0.3603	0.4588	0.6739	0.3862	0.3732	0.4225	0.394	0.394	0.3784	1.4618	0.5547	1.6044	0.5676	0.4225	0.6558	0.6324	0.4536	0.3966	0.4899	0.9072	0.4536	0.5547	2.4701	0.8113	1.1353	0.5262	0.5313	0.4691	1.1301	0.5236	16.2771	0.4147	3.4887	0.4432	0.9201	0.4069	0.5106	0.4354	1.5966	0.3966	1.8584	0.438	0.578	0.6998	0.4614	0.4614	0.4976	1.5059
L119-C08	389.47	0.4237	0.5212	0.7061	0.3954	0.511	0.4005	0.38	0.3749	0.321	1.9822	0.457	1.0938	0.8447	0.4083	0.7343	0.5983	0.4827	0.38	0.4904	0.7831	0.4801	0.4185	1.6048	0.8319	0.9757	0.4776	0.3851	0.4673	1.0039	0.4955	18.9259	0.5212	4.1364	0.4647	1.2273	0.5854	0.5187	0.4673	1.7357	0.3928	1.4558	0.3928	0.4262	0.6265	0.4031	0.5161	0.5392	1.7023
L119-C09	334.7	0.4392	0.5109	0.8844	0.5139	0.4541	0.4601	0.4302	0.49	0.4213	2.0048	0.5975	1.5626	0.7021	0.4511	0.7858	0.6991	0.5617	0.4691	0.5497	0.8186	0.487	0.5378	2.2677	0.9441	1.0009	0.5378	0.4392	0.5557	1.0158	0.6274	19.4858	0.5109	4.0842	0.5438	1.216	0.493	0.5139	0.5109	1.7269	0.5408	1.2937	0.4691	0.5049	0.6214	0.496	0.5707	0.6125	1.6791
L119-C10	292.42	0.6019	0.7079	0.9815	0.5506	0.5369	0.4377	0.5061	0.513	0.5232	3.2898	0.6532	0.66	0.9302	0.4993	0.9815	0.7763	0.5916	0.5677	0.4924	1.5081	0.5916	0.5232	0.8207	0.8823	0.9028	0.513	0.4959	0.6463	1.1524	0.5608	22.7446	0.5643	4.4149	0.4959	1.4192	0.6942	0.5882	0.4719	1.809	0.5335	1.1593	0.5061	0.6634	0.6703	0.5403	0.6326	0.5916	1.7475
L119-C11	337.31	0.4447	0.4239	1.0376	0.4358	0.5455	0.5336	0.4625	0.4062	0.4328	2.3035	0.5663	2.7067	0.8479	0.4655	0.8538	0.7619	0.5099	0.4536	0.6107	1.1325	0.5959	0.7204	3.9845	1.3015	1.343	0.6611	0.4862	0.6048	1.4972	0.6552	24.2451	0.5218	5.2415	0.4595	1.3549	0.5277	0.6196	0.5633	2.4399	0.5574	2.2354	0.4477	0.4981	0.9161	0.5099	0.6344	0.6582	2.3925
L119-C12	358.71	0.5241	0.4209	0.8977	0.4182	0.3429	0.3624	0.4962	0.3791	0.4209	2.7348	0.5687	0.7081	0.4795	0.3791	0.7611	0.8307	0.4126	0.4488	0.4265	0.5185	0.3875	0.4321	0.9869	0.5241	0.5408	0.4432	0.3931	0.4237	0.945	0.5938	20.9944	0.5241	4.4576	0.5157	1.2461	0.5352	0.5018	0.3986	0.7527	0.3903	0.7917	0.5492	0.6133	0.407	0.3819	0.4488	0.5297	1.6169
L119-D01	391.04	0.4756	0.5626	0.7621	0.3861	0.3964	0.4347	0.4117	0.3606	0.3376	2.2146	0.491	1.6494	1.2607	0.4143	0.8055	0.5703	0.3964	0.381	0.6495	1.3784	0.491	0.5703	2.6084	1.2403	1.0971	0.4322	0.3734	0.5242	1.2173	0.6086	15.1722	0.3785	3.4472	0.4398	0.849	0.445	0.4808	0.4833	1.6034	0.4859	1.6494	0.4705	0.491	0.6905	0.5217	0.5421	0.5575	1.2556
L119-D02	375.89	0.3751	0.4363	0.7635	0.4017	0.4044	0.3379	0.4416	0.3272	0.3751	1.7026	0.5028	1.4712	0.5347	0.3964	0.713	0.8141	0.3911	0.3512	0.4922	0.7529	0.4097	0.5906	2.1948	0.8486	0.854	0.4656	0.4602	0.431	1.0162	0.4868	22.4399	0.4789	4.7514	0.4097	1.4153	0.4789	0.548	0.4044	1.6015	0.4177	1.5749	0.4576	0.4283	0.5347	0.4124	0.4895	0.5773	1.8356
L119-D03	394.55	0.4587	0.3852	0.9023	0.4131	0.37	0.3092	0.3751	0.4258	0.3295	1.7843	0.4359	0.5475	0.4283	0.3498	0.768	0.6818	0.3979	0.3675	0.4081	0.5044	0.4005	0.4663	0.6007	0.5475	0.4968	0.3928	0.4055	0.3954	0.8693	0.512	20.9477	0.4207	4.4734	0.4537	1.2647	0.4892	0.5627	0.4486	0.7781	0.3244	0.5905	0.4207	0.4309	0.4309	0.3472	0.3852	0.4587	1.3762
L119-D04	191.76	0.6519	6.3934	1.0691	0.7249	0.7457	0.6623	0.6988	0.7405	0.6362	1.1056	2.4145	0.97	1.0638	0.6936	1.0273	0.777	0.7301	0.7144	0.6988	0.9491	0.7666	0.85	0.7249	1.4289	1.0534	0.7666	0.6623	2.1642	1.1838	0.97	24.0302	0.8396	4.902	0.8083	1.5697	0.7249	0.7822	0.6675	4.3284	0.7301	1.1421	0.7874	1.0013	0.7249	0.6831	0.85	0.8552	1.82
L119-D05	413.56	0.4352	0.3917	0.8415	0.3869	0.3216	0.3554	0.4062	0.4135	0.3313	1.3759	0.3772	0.6239	0.4159	0.3675	0.6432	0.6359	0.3603	0.3675	0.37	0.5852	0.3724	0.4086	0.9213	0.6384	0.7713	0.3796	0.3434	0.37	0.8705	0.4884	21.5494	0.532	4.6208	0.4909	1.3106	0.4739	0.4764	0.3361	1.3082	0.3627	0.8197	0.4352	0.3845	0.4449	0.3313	0.4473	0.5029	1.5161
L119-D06	405.81	0.4066	0.3967	0.8403	0.4238	0.3622	0.4091	0.414	0.4017	0.2957	1.2912	0.446	1.4366	0.5421	0.4238	0.6875	0.6161	0.4756	0.4017	0.5076	0.7294	0.4238	0.4879	2.1143	0.791	0.8575	0.4091	0.4386	0.3721	1.0498	0.515	20.522	0.4386	4.6278	0.4756	1.2444	0.4805	0.5791	0.4337	1.3972	0.4041	1.0276	0.4411	0.3918	0.5421	0.4682	0.4731	0.5273	1.5598
L119-D07	356.72	0.6055	0.7485	1.0905	0.4625	0.5551	0.4177	0.3728	0.4149	0.3869	2.75	0.6083	1.0877	1.1942	0.4822	0.8802	0.6924	0.513	0.4485	0.4766	1.2475	0.4513	0.499	1.6764	0.9391	1.0737	0.5522	0.4513	0.5579	1.2391	0.5859	24.1588	0.4822	4.7992	0.5298	1.2559	0.5663	0.5522	0.4513	2.1754	0.4177	1.5586	0.4738	0.4653	0.7653	0.4569	0.5803	0.5803	2.0044
L119-D08	352.94	0.4647	0.5525	0.9888	0.4335	0.4958	0.4278	0.4647	0.4052	0.425	2.4225	0.5695	1.6405	0.4873	0.4448	0.9378	0.9775	0.4902	0.4533	0.4873	0.85	0.3967	0.4788	2.3403	0.8387	1.0597	0.544	0.4165	0.4902	1.1673	0.6432	25.1969	0.612	5.1623	0.4788	1.4082	0.6092	0.6347	0.476	2.1052	0.5015	2.1477	0.5865	0.5695	0.8358	0.4647	0.5865	0.6828	2.2808
L119-D09	339.72	0.4827	0.5298	0.8684	0.468	0.4798	0.4916	0.4857	0.4563	0.4092	1.2775	0.5387	1.0597	0.6211	0.3473	0.6535	0.5769	0.4563	0.4239	0.3768	0.9478	0.4621	0.4975	1.3953	0.733	0.9832	0.4739	0.4003	0.4975	1.0803	0.6829	18.3327	0.6623	3.7472	0.5092	1.2775	0.6123	0.6005	0.4621	1.4011	0.5092	1.6572	0.4533	0.4592	0.6594	0.4945	0.471	0.5387	1.5837
L119-D10	263.45	0.6263	0.9186	1.0363	0.6415	0.6453	0.5352	0.5618	0.577	0.4631	2.8393	0.6073	1.7309	1.2412	0.6035	1.0856	0.911	0.5997	0.6605	0.6035	1.2602	0.5656	0.7174	2.3952	1.1008	1.1767	0.6605	0.5732	0.7592	1.3323	0.7592	21.8031	0.5694	4.2133	0.5694	1.2185	0.6339	0.763	0.5883	2.213	0.6111	2.0649	0.5997	0.687	0.8958	0.6377	0.7022	0.687	2.0611
L119-D11	355.72	0.5397	0.4189	0.8939	0.3739	0.3655	0.3964	0.4863	0.3992	0.3598	1.9791	0.4554	0.7562	0.4189	0.3514	0.7225	0.7562	0.3879	0.4189	0.4891	0.5847	0.3739	0.461	1.1132	0.6522	0.4976	0.4076	0.3992	0.3879	0.8799	0.5763	18.6127	0.4807	3.9216	0.4891	1.3971	0.461	0.5144	0.4554	0.6185	0.4385	0.7309	0.4638	0.3711	0.4189	0.4329	0.4891	0.5088	1.4028
L119-D12	270.29	0.7436	0.5957	1.0137	0.6068	0.5883	0.5994	0.5291	0.4847	0.5291	2.1939	0.6031	3.0745	1.5835	0.555	0.9138	0.8065	0.555	0.6955	0.788	2.9894	0.7658	0.7362	4.5728	1.5502	1.3911	0.629	0.6216	0.6142	1.5539	0.714	24.2109	0.6105	5.0464	0.6807	1.6131	0.6474	0.7103	0.5994	2.5195	0.5994	2.0718	0.5735	0.6844	0.9656	0.6401	0.7436	0.7214	1.9645
L119-E01	407.22	0.7392	0.5795	0.8005	0.4445	0.469	0.3757	0.5157	0.3585	0.3757	5.0881	0.6753	1.2033	0.6458	0.3855	0.8349	0.7662	0.415	0.4666	0.501	0.9282	0.3831	0.5059	1.8786	0.7858	0.8005	0.4469	0.4911	0.4494	0.9823	0.5329	17.0202	0.4199	3.6025	0.4347	0.9774	0.5157	0.4862	0.4273	1.4562	0.4617	1.1984	0.4199	0.4052	0.5108	0.3757	0.4617	0.5402	1.3064
L119-E02	307.71	0.6045	0.9489	0.9262	0.5005	0.507	0.4777	0.5362	0.4647	0.5752	3.4513	0.6467	1.1829	0.7247	0.4875	1.1049	0.8255	0.481	0.5037	0.5687	0.9977	0.5395	0.6565	1.9369	1.1277	1.0562	0.5297	0.5005	0.6857	1.3519	0.728	17.9943	0.494	3.7015	0.5395	1.1894	0.663	0.6175	0.52	1.6769	0.5427	1.5957	0.5232	0.5427	0.663	0.5492	0.5752	0.6467	1.5697
L119-E03	407.75	0.5739	0.4071	0.9491	0.3728	0.4341	0.3654	0.3679	0.3532	0.363	1.9228	0.4635	0.8265	0.7603	0.3924	0.7014	0.6524	0.3384	0.3311	0.4414	1.2238	0.4562	0.4243	1.2336	0.7676	0.7137	0.488	0.5077	0.3998	0.9687	0.5445	21.0227	0.5003	4.4366	0.5028	1.2066	0.4365	0.5224	0.4071	1.2238	0.4341	0.8903	0.4758	0.3679	0.4586	0.3654	0.4733	0.4782	1.4421
L119-E04	360.1	0.5304	0.4054	0.9192	0.4082	0.3805	0.4193	0.4054	0.3499	0.3943	2.2438	0.4804	1.0442	0.8303	0.4027	0.7637	0.6387	0.436	0.411	0.436	0.8692	0.4915	0.4971	1.4052	0.722	0.7692	0.5637	0.4693	0.4971	1.0469	0.5554	20.4083	0.5026	4.2266	0.4415	1.3469	0.4915	0.5943	0.4332	1.3552	0.4499	0.9581	0.4999	0.4082	0.5526	0.4943	0.4415	0.6054	1.6218
L119-E05	371.64	0.5489	0.487	0.9902	0.5166	0.4574	0.3955	0.4251	0.3713	0.409	2.602	0.5785	1.4772	0.5812	0.4682	0.9525	0.9014	0.4951	0.4225	0.6054	0.8153	0.4413	0.5597	2.2037	0.9149	0.9202	0.5086	0.4574	0.4709	1.192	0.6216	25.183	0.5516	5.4004	0.4897	1.4342	0.5112	0.6377	0.4386	1.7113	0.5301	1.4934	0.4924	0.4843	0.6323	0.5247	0.4951	0.6162	2.0235
L119-E06	379.39	0.4586	0.4454	0.8197	0.4534	0.4217	0.4507	0.4191	0.4191	0.4112	1.7976	0.4534	1.0174	0.4692	0.3743	0.7486	0.7696	0.4138	0.4375	0.4507	0.6405	0.4428	0.4718	1.3838	0.6141	0.7433	0.4165	0.3901	0.4454	1.0306	0.5377	22.3461	0.5219	4.7839	0.456	1.4286	0.5298	0.5034	0.4085	1.3785	0.4692	1.0859	0.5061	0.4033	0.5272	0.456	0.4507	0.5272	1.9373
L119-E07	413.58	0.3796	0.3772	0.8342	0.4014	0.3941	0.3385	0.3458	0.3409	0.3337	1.192	0.4135	0.7931	0.7302	0.4256	0.6045	0.6528	0.3675	0.3409	0.3482	0.6577	0.3167	0.3917	1.047	0.59	0.6238	0.411	0.3603	0.4231	0.8052	0.5682	25.7847	0.4546	5.4234	0.4522	1.3927	0.3844	0.4908	0.353	1.0639	0.3482	0.7568	0.4425	0.3675	0.4933	0.3554	0.4086	0.4884	1.5112
L119-E08	398.35	0.4619	0.492	0.8058	0.5347	0.4293	0.3715	0.4042	0.3991	0.359	2.8844	0.4845	1.1949	0.9213	0.3514	0.8836	0.6502	0.4117	0.4017	0.4594	0.8912	0.3966	0.5347	1.6418	0.8284	0.8284	0.4719	0.3891	0.4493	1.1372	0.5322	21.2976	0.4644	4.5814	0.5196	1.1723	0.497	0.5749	0.5247	1.579	0.4544	1.2376	0.4745	0.4017	0.718	0.4192	0.497	0.4996	1.7547
L119-E09	338.33	0.603	0.4729	0.7626	0.532	0.47	0.4315	0.467	0.4138	0.3695	1.4069	0.4611	1.5813	0.6828	0.4227	0.7478	0.6946	0.4434	0.4138	0.5793	0.7212	0.3606	0.4611	2.0158	0.7655	0.8276	0.4966	0.3902	0.4522	1.0315	0.4966	18.4524	0.4759	3.9843	0.5232	1.2296	0.5498	0.5261	0.5025	1.2591	0.4759	1.2443	0.5557	0.5911	0.5645	0.4522	0.4788	0.535	1.5695
L119-E10	331	0.5378	0.4955	0.8701	0.4562	0.4351	0.4411	0.5227	0.4381	0.4109	1.716	0.4713	1.29	0.565	0.4169	0.6949	0.6677	0.4864	0.432	0.5589	0.7704	0.4351	0.6345	2.3021	0.7432	1.0725	0.4925	0.3958	0.4894	1.0725	0.6314	15.7918	0.4653	3.5016	0.4622	1.1118	0.5045	0.571	0.4683	1.3807	0.4592	1.7795	0.4925	0.4834	0.707	0.4471	0.568	0.5861	1.5891
L119-E11	228.47	0.7222	0.8666	1.3393	0.6697	0.9104	0.6171	0.6784	0.6478	0.6434	3.5497	0.6959	1.7289	1.1599	0.569	1.3437	0.906	0.6434	0.7178	0.7484	2.0615	0.7353	0.7397	2.613	1.1424	1.3787	0.7747	0.6828	0.6653	1.1993	0.7528	24.2787	0.6215	5.2479	0.6478	1.405	0.6697	0.6303	0.6303	2.311	0.6959	2.6743	0.6303	0.7922	0.8754	0.6653	0.7397	0.6828	2.0747
L119-E12	184.94	0.8381	0.8543	1.1733	0.7408	0.7624	0.6975	0.7299	0.9354	0.7245	1.8871	0.7137	1.6816	1.0111	0.7191	1.0544	1.1409	0.8056	0.8165	0.8273	0.9192	0.7624	0.8002	2.1033	1.1463	1.0706	0.7786	0.9408	0.7029	1.4383	0.9787	28.9168	1.0381	6.2451	0.8868	1.6491	0.6975	0.8273	0.6813	2.4872	0.903	2.3845	0.7408	0.6759	0.784	0.7624	0.7245	1.076	2.4764
L119-F01	407.6	0.5177	0.687	0.8121	0.4024	0.4097	0.4122	0.4711	0.4073	0.4024	3.2017	0.6011	1.5211	1.0721	0.3901	1.1605	0.687	0.3876	0.3754	0.5177	0.7311	0.4195	0.5177	2.3921	0.8292	0.974	0.4907	0.4711	0.5545	1.1752	0.606	18.3195	0.4416	3.7733	0.3778	1.0157	0.4539	0.579	0.4122	1.9554	0.4244	1.3297	0.4146	0.4195	0.6158	0.5029	0.4833	0.6477	1.6315
L119-F02	437.27	0.4299	0.6655	0.8416	0.3636	0.4345	0.3751	0.4391	0.3408	0.3613	3.515	0.59	1.0749	0.4757	0.4002	1.0794	0.8576	0.4871	0.3865	0.3934	0.7204	0.4299	0.5146	1.53	0.869	0.9399	0.4094	0.3956	0.4482	1.3607	0.622	24.4541	0.5168	5.4955	0.4688	1.363	0.478	0.6106	0.4848	1.4819	0.3659	1.8387	0.4231	0.5466	0.6838	0.4139	0.4871	0.5511	1.7838
L119-F03	379.58	0.4716	0.5743	0.9221	0.4162	0.4953	0.411	0.49	0.3688	0.3557	2.8347	0.5453	1.4015	0.8114	0.4663	1.0801	0.8299	0.5085	0.4294	0.411	1.0406	0.4373	0.5401	2.0865	1.3567	1.3805	0.5243	0.4268	0.5322	1.3884	0.5954	25.3804	0.4953	5.5008	0.519	1.4779	0.5085	0.6639	0.4241	2.4158	0.5058	2.0812	0.4795	0.5137	0.8746	0.4294	0.5032	0.6191	2.3289
L119-F04	361.16	0.4984	0.6147	0.7725	0.4846	0.4043	0.4153	0.4375	0.3987	0.407	2.6858	0.5759	1.3955	0.659	0.479	0.8556	0.875	0.4513	0.4707	0.5704	0.7808	0.4375	0.5538	2.1708	0.8168	0.9802	0.5455	0.407	0.5842	1.0716	0.6618	17.9783	0.5178	4.0176	0.4818	1.1214	0.4652	0.5039	0.5095	1.5118	0.5399	1.6641	0.5205	0.5953	0.6867	0.4347	0.5676	0.5205	1.7444
L119-F05	385.78	0.3966	0.4744	0.7491	0.4277	0.4277	0.477	0.4096	0.4692	0.3655	3.8883	0.6688	1.4801	0.5158	0.3577	0.7854	0.7362	0.4407	0.4173	0.464	0.8217	0.4821	0.6351	2.3744	0.8373	1.0032	0.4199	0.4096	0.4899	1.2779	0.6455	20.0012	0.4796	4.43	0.4614	1.1768	0.4355	0.6118	0.4225	1.4957	0.381	1.4464	0.4251	0.4355	0.5962	0.3992	0.4796	0.5677	1.6979
L119-F06	375.55	0.5911	0.5778	0.7829	0.482	0.4394	0.3914	0.3941	0.3941	0.3302	2.4391	0.5166	1.0944	0.8201	0.3861	0.8947	0.6737	0.4447	0.4527	0.4873	1.3474	0.5059	0.4846	1.5844	0.8468	0.8095	0.458	0.45	0.5379	1.0252	0.5033	19.0974	0.5086	3.9063	0.466	1.169	0.4926	0.5326	0.5512	1.2914	0.4926	1.1317	0.5246	0.4527	0.5592	0.3888	0.5432	0.4926	1.4459
L119-F07	296.08	0.6485	0.6417	0.9795	0.4728	0.5404	0.5269	0.5471	0.5438	0.4965	3.1208	0.6586	1.2429	1.1146	0.5404	0.9997	0.841	0.5404	0.6113	0.6924	0.9254	0.5674	0.5944	1.8711	0.9491	0.8984	0.6046	0.4999	0.5944	1.1213	0.7093	18.4004	0.5404	4.1171	0.4424	1.4084	0.5742	0.6383	0.51	1.4624	0.5674	1.4422	0.635	0.5539	0.6822	0.5674	0.4897	0.6755	1.6279
L119-F08	382.51	0.4732	0.4444	0.8287	0.4627	0.4418	0.4078	0.4261	0.3817	0.3582	1.4771	0.4601	1.6862	0.6144	0.4209	0.6771	0.7686	0.4758	0.3843	0.4967	0.8627	0.4157	0.5542	2.6823	0.9594	1.1529	0.4941	0.4157	0.4836	1.2418	0.5621	19.3169	0.4706	4.3292	0.5124	1.1895	0.5072	0.583	0.4523	1.7463	0.4209	1.7045	0.6693	0.4653	0.7189	0.4444	0.5516	0.5595	1.6548
L119-F09	325.53	0.5591	0.5376	1.1305	0.5652	0.4485	0.4823	0.4301	0.4485	0.4147	2.479	0.5591	1.6773	0.7434	0.5069	0.9492	0.9615	0.4854	0.4761	0.5867	0.9339	0.5929	0.5529	2.2855	0.9861	0.9646	0.5099	0.5222	0.5898	1.2073	0.7158	27.1527	0.5192	5.7476	0.5284	1.4868	0.5253	0.639	0.427	2.3777	0.4639	1.5206	0.5683	0.4608	0.7311	0.4761	0.5437	0.642	2.307
L119-F10	332.47	0.4903	0.4602	0.9084	0.5564	0.5294	0.4061	0.4421	0.391	0.403	1.3415	0.6407	1.4467	0.8001	0.4572	0.7399	0.6497	0.5083	0.5324	0.5173	1.0798	0.5384	0.6286	2.2167	0.8753	0.9234	0.4843	0.5143	0.5955	1.1249	0.5955	21.2049	0.5594	4.3914	0.4752	1.3866	0.5985	0.4993	0.4782	1.2272	0.4452	1.2573	0.5474	0.4482	0.6828	0.4452	0.4812	0.5384	1.546
L119-F11	321.8	0.4879	0.5749	0.9229	0.4475	0.5531	0.5221	0.55	0.4257	0.4754	1.5134	0.5065	1.7526	0.8359	0.4754	0.693	0.7023	0.5531	0.5966	0.5625	1.156	0.5003	0.5842	2.6227	0.9602	1.0907	0.4817	0.5345	0.55	1.1436	0.5034	19.1889	0.4817	4.1423	0.491	1.2057	0.4817	0.5935	0.4382	1.5102	0.4506	1.2119	0.4817	0.4848	0.6868	0.5594	0.519	0.5842	1.5569
L119-F12(pET28)	332.27	0.5146	0.5297	0.8276	0.4845	0.4755	0.4755	0.5628	0.4244	0.4424	1.8539	0.6621	2.2482	0.6681	0.4906	3.3798	0.9029	0.5297	0.5297	0.8005	1.3062	0.5417	0.7885	3.9546	0.951	1.5259	0.5688	0.4334	0.5989	1.3302	0.7253	20.7902	0.5718	4.2495	0.5267	1.1316	0.6079	0.6019	0.6079	1.8358	0.4755	2.7538	0.5658	0.5568	0.933	0.5237	0.5357	0.5568	2.2241
L119-G01	419.97	0.5905	0.5572	0.8667	0.3905	0.381	0.3738	0.4453	0.3738	0.3429	3.1122	0.5548	1.9692	0.6929	0.4024	0.9358	0.7334	0.4334	0.3548	0.4929	0.9977	0.4286	0.6262	2.9693	0.8477	0.9191	0.4048	0.4048	0.5024	1.3501	0.5715	22.5256	0.5262	5.0433	0.4762	1.2049	0.4643	0.6215	0.5024	1.793	0.4334	1.3882	0.3762	0.4691	0.6501	0.4262	0.4929	0.5929	1.7859
L119-G02	162.4	0.7574	1.016	1.0529	0.9791	0.7328	0.7697	0.8621	0.8559	0.8744	3.1527	0.8928	0.9975	0.7882	0.8313	1.2438	1.3424	0.782	0.9052	0.7512	0.9975	0.8497	0.8128	1.1823	1.1576	1.0283	0.899	0.8744	0.8497	1.6564	1.1207	24.852	0.8559	4.9876	1.0098	1.4532	1.133	1.0222	0.8128	1.8534	0.819	1.5148	0.8497	0.8805	0.936	0.8805	0.9236	0.9483	1.9581
L119-G03	241.9	0.5705	11.2445	0.6945	0.649	0.5374	0.4713	0.5746	0.7855	0.6036	0.7317	3.5842	1.2857	0.8475	0.711	0.7483	0.7152	0.6408	0.6904	0.5416	0.9301	0.5746	0.6449	1.3725	1.6825	1.5668	0.7234	0.5912	3.5511	1.1534	0.6656	17.1891	0.587	3.6296	0.5167	0.9632	0.5457	0.8971	0.5292	6.9823	0.9095	1.327	0.5912	1.5378	0.7565	0.6945	0.74	0.6408	1.542
L119-G04	243.62	0.6239	0.5459	1.1329	0.5172	0.5459	0.5706	0.5582	0.7101	0.5377	1.646	0.628	1.8266	0.784	0.5213	0.862	0.7594	0.5582	0.6855	0.7142	0.8989	0.5952	0.7019	2.4054	0.8784	0.825	0.6732	0.5829	0.6896	0.9646	0.7594	18.9144	0.6362	4.3428	0.6732	1.6747	0.6157	0.6978	0.6937	1.3463	0.5459	0.8579	0.7512	0.6691	0.7388	0.5952	0.706	0.5993	1.4777
L119-G05	411.33	0.5567	0.637	0.9724	0.3938	0.4352	0.3817	0.389	0.3452	0.3039	1.9643	0.53	1.0527	0.8898	0.3768	0.8387	0.5592	0.3817	0.3793	0.4327	1.2934	0.4741	0.3938	1.466	0.7536	0.7512	0.4619	0.3865	0.4765	1.0746	0.4935	21.8557	0.4741	4.6799	0.4352	1.2253	0.5397	0.4352	0.4133	1.5365	0.3817	0.863	0.423	0.389	0.5251	0.3914	0.44	0.6126	1.4125
L119-G06	315.65	0.5766	0.5227	0.9029	0.5259	0.4404	0.5164	0.5322	0.4119	0.4119	1.6094	0.5101	1.5112	0.7033	0.4911	0.7984	0.697	0.453	0.3833	0.5164	0.9948	0.4816	0.6209	2.0339	0.7223	0.8997	0.4879	0.5101	0.4214	0.998	0.6653	19.4426	0.6621	4.2801	0.5417	1.4193	0.6051	0.5893	0.5164	1.4225	0.4657	1.1532	0.5481	0.5132	0.5417	0.434	0.4911	0.5734	1.4827
L119-G07	413.94	0.5146	0.4663	0.8238	0.4155	0.4107	0.3817	0.4397	0.3962	0.3938	1.9858	0.4735	0.9108	0.8431	0.4034	0.7948	0.6764	0.4324	0.459	0.4373	0.6861	0.4034	0.4083	1.3432	0.8214	0.7755	0.5218	0.4904	0.4735	0.9494	0.4735	16.2439	0.4832	3.5875	0.5025	0.9615	0.4735	0.5194	0.4783	1.5123	0.36	0.9591	0.4542	0.5001	0.5508	0.4034	0.4856	0.4807	1.307
L119-G08	380.05	0.5052	0.5604	0.7946	0.4157	0.421	0.3868	0.4052	0.3868	0.4631	2.5523	0.5552	1.4182	0.5499	0.4394	0.7788	0.7394	0.5052	0.4052	0.5552	0.9025	0.4105	0.5657	2.2339	0.792	1.0051	0.4789	0.492	0.5447	1.1604	0.5868	18.2632	0.4105	3.8626	0.4368	0.9867	0.5604	0.5105	0.5604	1.4524	0.421	1.6366	0.4894	0.492	0.5947	0.3999	0.5157	0.5052	1.5866
L119-G09	276.74	0.4589	0.524	0.8528	0.5059	0.4951	0.6035	0.4734	0.4914	0.4698	1.29	0.5962	2.4789	0.9178	0.4914	0.8275	0.7119	0.5601	0.5312	0.7408	1.0732	0.6757	0.7841	3.5485	0.9359	1.0082	0.6649	0.5782	0.4698	1.2431	0.636	20.8212	0.6649	4.6073	0.5529	1.4021	0.6215	0.6541	0.5384	1.8104	0.589	1.3081	0.5926	0.542	0.7408	0.5746	0.5818	0.6866	1.814
L119-G10	345.21	0.4925	0.5794	0.9038	0.4751	0.5301	0.5011	0.4954	0.4722	0.42	1.7207	0.5765	2.3232	1.4021	0.5533	0.8198	0.8893	0.5504	0.4954	0.7242	2.2421	0.6431	0.6952	3.6471	1.2746	1.3905	0.5243	0.4867	0.5214	1.8742	0.7445	26.7201	0.5649	5.4605	0.5562	1.2746	0.5591	0.5823	0.5649	3.9976	0.6663	3.0851	0.4809	0.5504	1.1413	0.6576	0.7445	0.7966	2.6709
L119-G11	346.28	0.5631	0.4823	0.9674	0.4852	0.5458	0.4909	0.4447	0.4707	0.4014	1.6287	0.4967	1.6547	1.1609	0.4736	0.7941	0.7566	0.5111	0.4245	0.6238	1.6778	0.54	0.6007	2.3738	1.0454	0.8606	0.5804	0.4967	0.5169	0.9299	0.6324	17.734	0.5342	4.0429	0.4996	1.1003	0.5602	0.5718	0.4476	1.4757	0.4794	1.0945	0.4678	0.4678	0.5545	0.618	0.5949	0.566	1.3486
L119-G12(WT)	200.18	0.8842	0.9741	1.0041	0.7244	0.8043	0.6694	0.6994	0.5795	0.6694	2.8674	0.7593	2.5277	1.3588	0.7393	1.149	0.6944	0.7543	0.6494	0.8992	2.3579	1.0041	0.8193	3.7117	1.3288	1.164	0.7993	0.6994	0.8992	1.3288	0.7443	14.9516	0.7293	3.4219	0.7593	1.149	0.7993	0.6894	0.6744	1.8284	0.7593	1.8433	0.7293	0.7793	0.9941	0.8842	0.8542	0.7743	1.5886
L119-H01	399.55	0.4855	0.5531	0.9911	0.4655	0.3329	0.4906	0.458	0.3604	0.3479	2.3602	0.468	2.8332	1.3315	0.4405	0.8835	0.5656	0.4405	0.4981	0.6307	1.0712	0.4705	0.6683	3.987	1.1012	0.8635	0.4705	0.4055	0.408	1.2364	0.5431	24.3999	0.4931	5.4111	0.453	1.5267	0.5006	0.5356	0.463	1.9672	0.418	0.9736	0.478	0.413	0.6432	0.5406	0.5156	0.5606	1.6894
L119-H02	375.21	0.4531	0.5624	0.9142	0.4744	0.4931	0.4637	0.4371	0.4797	0.4184	2.0362	0.4957	2.2468	0.9648	0.4557	0.8848	0.7756	0.4557	0.4691	0.6263	1.3992	0.5091	0.6237	3.4461	1.1274	1.1753	0.5437	0.557	0.5304	1.4046	0.6663	20.4606	0.5677	4.5095	0.4824	1.2153	0.5144	0.5677	0.4691	2.2521	0.5384	1.9163	0.4611	0.4478	0.8102	0.4797	0.581	0.597	1.807
L119-H03	354.56	0.4372	0.5923	0.8913	0.4569	0.4879	0.4738	0.4541	0.4343	0.4259	2.0335	0.5725	1.7656	0.8772	0.4626	0.7756	0.7418	0.5331	0.4061	0.519	1.1254	0.5641	0.5302	2.5412	1.0182	1.1536	0.5105	0.5077	0.55	1.3736	0.5641	19.8051	0.4992	4.1291	0.5472	1.2297	0.4908	0.5274	0.4936	1.8276	0.4259	2.152	0.4682	0.4851	0.7982	0.5049	0.581	0.5838	1.7261
L119-H04	323.22	0.461	0.6404	0.9653	0.4393	0.5136	0.4331	0.4301	0.4208	0.4393	2.209	0.6126	2.3545	0.6497	0.4548	0.9158	0.8725	0.5383	0.5507	0.6188	0.9127	0.6126	0.6838	4.0252	1.1355	1.2809	0.6312	0.5043	0.6002	1.6026	0.7363	27.6317	0.5507	6.03	0.461	1.4449	0.5198	0.6435	0.5755	2.373	0.5631	1.9708	0.5414	0.495	0.922	0.7054	0.6033	0.6745	2.1967
L119-H05	261.45	0.6693	0.7344	0.9677	0.6693	0.6693	0.6655	0.6464	0.5737	0.5087	2.815	0.7344	1.8512	0.6693	0.5584	1.0518	0.9638	0.5967	0.6426	0.7344	0.9371	0.5049	0.7611	2.5817	0.9791	1.0901	0.5508	0.5431	0.7152	1.4649	0.7573	20.3746	0.5737	4.387	0.654	1.2584	0.5508	0.6081	0.6579	1.8206	0.5967	1.8206	0.5928	0.612	0.7191	0.6234	0.6273	0.7152	1.8244
L119-H06	339.09	0.5102	0.5574	0.8641	0.4188	0.4984	0.4719	0.5367	0.4158	0.4748	2.4065	0.6341	1.8343	0.5987	0.4247	0.8759	0.8051	0.5072	0.4719	0.5987	0.9083	0.4453	0.5869	3.0317	0.8729	1.0646	0.5249	0.5456	0.5102	1.2298	0.6282	19.5614	0.4895	4.3057	0.4925	1.2357	0.519	0.6105	0.4866	2.0555	0.5131	1.8078	0.4571	0.5456	0.7343	0.5485	0.6341	0.64	1.8904
L119-H07	397.43	0.6114	0.5435	0.8404	0.5334	0.4705	0.4101	0.4932	0.5057	0.3925	1.8091	0.5158	1.243	1.3839	0.4655	0.7775	0.7649	0.4932	0.5712	0.5259	1.17	0.5812	0.5435	1.633	1.0216	0.8781	0.4856	0.4554	0.6064	1.2153	0.5661	18.9013	0.5032	4.0233	0.5208	1.2254	0.473	0.5737	0.4605	2.0758	0.5435	1.794	0.5334	0.5007	0.7272	0.5309	0.5259	0.6668	1.56
L119-H08	368.11	0.4428	0.565	0.8639	0.4836	0.5053	0.5216	0.5515	0.5053	0.5026	1.812	0.6112	1.8663	0.9101	0.4564	0.7769	0.7226	0.4999	0.4211	0.6547	0.9264	0.4482	0.5868	2.6677	1.0595	1.0323	0.4944	0.4754	0.4428	1.1301	0.5406	17.742	0.5949	4.0233	0.4401	1.1518	0.546	0.5542	0.4564	1.562	0.5352	1.198	0.4781	0.4754	0.6656	0.451	0.5841	0.5705	1.543
L119-H09	236.95	0.6626	1.0593	1.2619	0.7343	0.6499	0.6879	0.6964	0.671	0.7048	3.7097	0.8272	1.6881	1.3843	0.6626	1.1395	1.1859	0.6373	0.7259	0.7428	1.245	0.6415	0.7217	2.6082	1.2239	1.1099	0.6795	0.671	0.8145	1.3167	0.8905	24.3512	0.7006	5.1403	0.7512	1.5615	0.7259	0.785	0.6879	1.9709	0.7259	1.6586	0.7217	0.7132	0.7934	0.7217	0.7765	0.7976	2.0848
L119-H10	251.04	0.7489	0.8485	0.9919	0.5696	0.5657	0.6214	0.5816	0.6812	0.6055	3.4816	0.7648	2.8721	0.972	0.5816	1.0994	1.0994	0.7688	0.6493	0.7688	0.9799	0.5856	0.717	4.2304	1.2468	1.3623	0.8246	0.5696	0.6453	1.4699	0.7688	23.1201	0.6055	4.9953	0.5816	1.4301	0.6413	0.5896	0.6334	2.896	0.7011	1.8125	0.6533	0.6453	0.9959	0.6015	0.8086	0.8286	2.2307
L119-H11	210.67	0.7215	1.0016	1.0016	0.6883	0.7548	0.6076	0.7025	0.7785	0.6123	2.6915	0.7737	1.9937	1.0823	0.7548	1.0253	0.9873	0.6598	0.6835	0.9161	1.3386	0.8687	0.8497	3.2089	1.3529	1.2532	0.7358	0.7358	0.788	1.481	0.8307	21.5128	0.7215	4.3814	0.8165	1.3576	0.826	0.8022	0.8117	2.0222	0.7358	2.4684	0.6883	0.7548	1.0348	0.7927	0.8117	0.8782	1.9842
L119-H12	348.88	0.5675	0.536	0.814	0.4328	0.4815	0.4701	0.579	0.5274	0.4099	1.694	0.5446	3.2934	0.8054	0.4844	0.8169	4.9243	0.7538	0.4643	0.8398	0.8542	0.4701	0.7366	5.0476	12.8985	1.737	0.536	0.4815	0.5675	0.7366	0.5561	15.1485	0.4586	3.9641	0.4042	1.115	0.5589	0.665	0.4156	1.1723	1.1437	1.972	0.4873	0.4959	0.4844	0.4672	0.6679	0.6679	1.2239
[truncated: 158 more columns]

## Sheet: L200
Sample Name	Mean Intensity	m/z 117.14	m/z 118.13	m/z 119.09	m/z 120.09	m/z 121.06	m/z 122.09	m/z 123.06	m/z 124.09	m/z 125.09	m/z 126.07	m/z 127.07	m/z 129.08	m/z 130.16	m/z 131.08	m/z 132.91	m/z 133.09	m/z 134.09	m/z 135.09	m/z 136.09	m/z 137.07	m/z 138.09	m/z 139.09	m/z 140.16	m/z 141.16	m/z 143.10	m/z 144.09	m/z 145.08	m/z 146.08	m/z 146.72	m/z 147.08	m/z 148.10	m/z 149.10	m/z 150.11	m/z 151.13	m/z 152.09	m/z 153.08	m/z 154.09	m/z 155.11	m/z 155.61	m/z 156.11	m/z 159.10	m/z 160.11	m/z 161.12	m/z 162.10	m/z 163.10	m/z 164.11	m/z 165.12	m/z 166.11
L200-A01	633.55	0.7576	0.1657	0.4798	0.1405	0.0805	0.4577	0.3599	0.1405	0.0852	0.1105	0.4293	0.1594	0.1342	0.0979	0.1136	0.3188	0.09	0.805	0.8902	3.6162	0.2336	0.0947	0.4798	0.0837	0.1105	0.6977	0.1894	21.3813	0.0931	3.5104	0.6677	0.1342	0.1515	0.1136	0.3078	0.3094	0.1389	8.4366	0.1357	0.3078	0.1026	0.3378	0.1357	0.1847	0.1894	1.7284	0.1657	0.2636
L200-A02	698.77	0.4765	0.1073	0.5968	0.1431	0.0873	0.2018	0.3449	0.1345	0.0816	0.0773	0.395	0.1116	0.1503	0.083	0.0687	0.2519	0.0744	0.8901	1.0361	3.5963	0.186	0.1102	0.4994	0.0873	0.0873	0.717	0.1803	24.3927	0.0787	4.3619	0.8257	0.1431	0.1689	0.1374	0.2719	0.2791	0.093	7.994	0.1302	0.2891	0.0716	0.3091	0.1374	0.1331	0.1703	1.8117	0.176	0.1946
L200-A03	325.17	5.1143	0.2368	0.2737	0.1384	0.1322	0.243	0.409	0.1784	0.1138	0.1322	0.3045	0.1814	0.1784	0.1138	0.1845	0.3137	0.1199	0.3967	0.3291	0.898	0.1876	0.1445	0.2614	0.1107	0.1722	0.3629	0.1753	20.4633	0.1169	2.9492	0.5874	0.1968	0.2399	0.1261	0.2214	0.203	0.1415	1.3747	0.1568	0.1661	0.1015	0.1814	0.1445	0.1353	0.1722	0.9841	0.1784	0.1507
L200-A04	579	0.5993	0.1123	0.7392	0.171	0.0864	0.247	0.323	0.133	0.0933	0.0984	0.2832	0.1226	0.2953	0.0846	0.0881	0.2988	0.095	1.3523	0.9568	2.1641	0.1744	0.0708	0.7237	0.133	0.0846	0.5941	0.1762	23.943	0.1019	3.9499	0.8895	0.171	0.152	0.1244	0.3541	0.228	0.1054	6.1969	0.1434	0.2176	0.0743	0.3126	0.1174	0.1468	0.1727	1.7927	0.1779	0.1796
L200-A05	414.55	0.9335	0.1544	1.1458	0.1978	0.1086	0.3184	0.4366	0.1906	0.1303	0.1327	0.5331	0.234	0.2702	0.111	0.164	0.4897	0.1423	1.9491	1.2447	3.8137	0.2412	0.1061	0.8949	0.2075	0.1375	0.8322	0.2243	27.784	0.1013	4.6628	0.8081	0.2243	0.2099	0.1737	0.3594	0.3932	0.1689	10.9829	0.1278	0.3715	0.1303	0.6127	0.1785	0.2219	0.2702	2.4195	0.2436	0.2243
L200-A06	523.9	0.5669	0.1126	0.8933	0.2023	0.0821	0.2176	0.3264	0.1203	0.0878	0.1012	0.4409	0.1794	0.3455	0.084	0.1164	0.3207	0.1031	1.5175	0.9735	3.1628	0.1909	0.1661	0.3245	0.0802	0.1145	0.5535	0.1871	23.7888	0.0954	3.8118	0.8265	0.1565	0.1489	0.1088	0.2959	0.3016	0.1374	7.9461	0.1279	0.292	0.084	0.3894	0.1374	0.1622	0.2329	1.9946	0.1718	0.1794
L200-A07	338.72	0.7912	0.124	0.7528	0.2155	0.1329	0.2303	0.4458	0.1919	0.124	0.1181	0.4281	0.1683	0.3425	0.1092	0.1506	0.3336	0.1476	1.2016	0.8266	3.4453	0.245	0.124	0.4901	0.1269	0.124	0.5048	0.1948	24.6395	0.0915	3.9029	0.989	0.1683	0.1535	0.1683	0.3159	0.307	0.1535	10.5277	0.1417	0.3838	0.1033	0.4163	0.1506	0.1506	0.2244	1.7684	0.1889	0.1978
L200-A08	431.71	0.9196	0.132	0.461	0.1274	0.1089	0.2363	0.3614	0.1228	0.0973	0.0857	0.1691	0.1181	0.3104	0.0973	0.1112	0.2548	0.0857	0.8015	0.2687	0.5652	0.0996	0.0741	0.505	0.1019	0.0834	0.2826	0.1575	21.6928	0.0973	3.3935	0.7436	0.1251	0.1645	0.0857	0.1598	0.132	0.1042	1.6354	0.1506	0.1158	0.0718	0.1482	0.0973	0.1112	0.1645	1.0655	0.1297	0.1158
L200-A09	306.36	0.6365	0.1436	0.7736	0.2285	0.1338	0.235	0.4243	0.2513	0.0979	0.1436	0.4374	0.1926	0.4015	0.1404	0.1501	0.297	0.124	1.211	1.0315	3.1825	0.222	0.173	0.6985	0.1371	0.1469	0.6398	0.2318	22.6364	0.124	3.9169	0.8715	0.2024	0.173	0.1665	0.4766	0.3395	0.1632	9.9848	0.1795	0.4047	0.1208	0.3558	0.1861	0.1632	0.3134	1.9258	0.2056	0.2252
L200-A10	328.08	0.5852	0.128	0.8016	0.1707	0.1036	0.1951	0.2957	0.1433	0.0853	0.0945	0.2134	0.1707	0.3018	0.1676	0.1311	0.2347	0.1067	1.4844	0.4572	1.3106	0.1676	0.1189	0.4572	0.0945	0.1433	0.2926	0.1707	20.9153	0.1097	3.1973	0.8687	0.1524	0.1341	0.1219	0.3048	0.1707	0.1189	3.7155	0.1372	0.189	0.0914	0.1494	0.1372	0.125	0.1615	1.1491	0.1615	0.1646
L200-A11	336.38	1.1326	0.1427	0.6778	0.1813	0.104	0.2557	0.3924	0.1605	0.11	0.0981	0.327	0.2378	0.4519	0.0922	0.1308	0.327	0.113	1.0167	0.6421	2.2237	0.2081	0.1308	0.4608	0.104	0.1249	0.4073	0.1873	21.66	0.11	3.1274	0.9573	0.1843	0.1635	0.1992	0.3389	0.2705	0.1635	6.9713	0.1368	0.3032	0.11	0.3092	0.1605	0.1546	0.2111	1.3853	0.1873	0.217
L200-A12	429.02	0.6969	0.1468	0.7808	0.1492	0.0932	0.2214	0.4266	0.1352	0.0909	0.1072	0.2378	0.1562	0.3893	0.0886	0.1049	0.282	0.0909	1.233	0.4872	2.0652	0.1538	0.0839	0.4638	0.0932	0.0932	0.3496	0.1865	22.4861	0.0979	4.0674	0.8857	0.1445	0.1329	0.1189	0.289	0.2214	0.1119	5.5638	0.1212	0.2401	0.0886	0.2005	0.1189	0.1282	0.1818	1.1888	0.1562	0.1585
L200-B01	665.54	0.3381	0.0736	0.7483	0.3125	0.0886	0.2344	0.2509	0.1397	0.0751	0.0841	0.1022	0.1187	0.2404	0.1112	0.0766	0.1893	0.0886	1.211	0.7137	6.8756	0.2524	0.1067	0.7588	0.0947	0.0902	0.9917	0.1923	27.0006	0.0947	4.6113	0.7483	0.1533	0.2013	0.0886	2.655	0.7528	0.1037	8.8785	0.1352	0.3245	0.0917	0.4042	0.1457	0.1533	0.1833	1.3192	0.1623	0.1863
L200-B02	520.34	1.2223	0.0999	1.1243	0.4689	0.0922	0.2979	0.2863	0.1595	0.0846	0.1115	0.1326	0.123	0.2614	0.1211	0.148	0.2787	0.1019	1.6777	1.2915	1.8891	0.1941	0.0961	0.5804	0.0961	0.1019	0.8725	0.2018	29.8188	0.0826	5.1562	0.9571	0.1595	0.2076	0.123	0.7168	0.3113	0.1211	4.8314	0.1499	0.1903	0.0903	0.5612	0.1807	0.2133	0.2383	2.1294	0.2018	0.2902
L200-B03	540.11	0.6628	0.1296	0.9109	0.2925	0.1129	0.2018	0.3277	0.1352	0.0759	0.1	0.1185	0.124	0.2407	0.1185	0.1129	0.2407	0.0926	1.3312	0.8239	1.5275	0.1481	0.1166	0.598	0.1037	0.0926	0.785	0.1463	22.388	0.0778	3.9029	0.7776	0.1555	0.187	0.1092	0.5703	0.3018	0.1037	5.3526	0.1222	0.2092	0.0796	0.3555	0.1407	0.1648	0.1963	1.8274	0.2055	0.2611
L200-B04	398.93	0.4938	0.1103	0.3986	0.1855	0.0877	0.2281	0.198	0.1354	0.0827	0.1003	0.1329	0.1379	0.3785	0.1178	0.0927	0.1529	0.0978	0.6843	0.2457	6.2317	0.2532	0.1103	0.356	0.1354	0.1354	0.5565	0.1529	14.757	0.1278	2.1056	0.5364	0.2005	0.1354	0.1153	2.3237	1.6644	0.1329	3.6673	0.1429	0.2206	0.1128	0.4161	0.1329	0.1705	0.173	0.7269	0.1579	0.1705
L200-B05	577.02	0.7331	0.078	0.8284	0.123	0.0711	0.2998	0.2496	0.1213	0.0659	0.0728	0.104	0.1473	0.4055	0.0832	0.1022	0.2288	0.0884	1.4627	0.3726	0.6638	0.104	0.0676	0.5823	0.0901	0.0919	0.3795	0.1508	21.6664	0.097	3.5579	0.8405	0.13	0.1092	0.097	0.2201	0.1768	0.0849	3.1437	0.1161	0.2201	0.0711	0.1473	0.1161	0.1248	0.1594	1.2114	0.1334	0.1681
L200-B06	478.02	0.6004	0.0983	0.659	0.1632	0.0774	0.274	0.2071	0.1443	0.0983	0.1088	0.113	0.1234	0.2824	0.0879	0.0941	0.1987	0.0858	0.9979	0.6171	0.8472	0.1276	0.0816	0.5063	0.1025	0.0983	0.5899	0.1443	22.411	0.1025	3.3429	0.705	0.1527	0.1674	0.1025	0.3159	0.272	0.0962	4.4956	0.1318	0.205	0.092	0.3473	0.136	0.1694	0.182	1.456	0.1653	0.1736
L200-B07	304.21	0.8777	0.1775	1.2721	0.2564	0.1315	0.3254	0.3484	0.1939	0.1348	0.1676	0.1742	0.2367	0.733	0.1545	0.1907	0.3156	0.1183	2.0545	0.6607	0.7495	0.2005	0.1216	0.4306	0.1479	0.1545	0.5227	0.2367	23.8352	0.1709	3.629	0.973	0.2038	0.2235	0.1644	0.3287	0.309	0.1446	6.9589	0.1775	0.3583	0.1052	0.355	0.1676	0.24	0.2498	1.6732	0.1939	0.2104
L200-B08	388.09	1.2935	0.1366	0.487	0.1649	0.1056	0.2783	0.3736	0.1546	0.0928	0.1211	0.1366	0.1623	0.5746	0.1056	0.1185	0.2577	0.0979	0.9714	0.2577	3.9063	0.1881	0.0928	0.9585	0.1391	0.1134	0.438	0.2242	19.1683	0.1031	2.6308	0.4999	0.1443	0.1417	0.1237	1.5383	0.6055	0.1546	5.6843	0.1598	0.268	0.1134	0.2396	0.1082	0.1649	0.1804	0.8065	0.1675	0.1804
L200-B09	374.26	0.5397	0.1095	0.5958	0.147	0.0962	0.2298	0.2752	0.1443	0.0908	0.1256	0.1256	0.1309	0.4622	0.1042	0.1176	0.1763	0.1202	0.9352	0.2779	5.9637	0.2645	0.1149	0.4516	0.1416	0.147	0.5184	0.1951	19.986	0.1042	2.8189	0.7481	0.187	0.1336	0.1283	2.354	0.8871	0.1443	6.2924	0.1737	0.2966	0.1202	0.2912	0.1176	0.147	0.1817	0.994	0.171	0.1416
L200-B10	341.58	0.7992	0.161	0.5562	0.1757	0.1142	0.2196	0.322	0.2049	0.1142	0.1317	0.1405	0.1639	0.486	0.1493	0.123	0.2254	0.123	0.9281	0.7524	1.0656	0.2225	0.1317	0.3777	0.1083	0.1171	0.6148	0.2108	21.2017	0.1376	3.1062	0.7319	0.1669	0.1991	0.1435	0.3952	0.3806	0.1288	9.8016	0.1405	0.3542	0.1347	0.3337	0.1669	0.1932	0.2459	1.5692	0.2225	0.2606
L200-B11	290.48	0.661	0.1136	0.4647	0.1652	0.1239	0.3236	0.327	0.1446	0.1136	0.1205	0.1756	0.1343	0.4785	0.1377	0.1377	0.1756	0.1239	0.7057	0.3408	3.8522	0.2169	0.148	0.3029	0.1239	0.1515	0.5026	0.2031	23.4577	0.1308	3.4598	0.957	0.2272	0.1893	0.1618	1.1016	0.8951	0.1825	8.7441	0.1893	0.3408	0.1239	0.3167	0.179	0.1549	0.2548	1.0465	0.1962	0.1756
L200-B12	268.46	0.488	0.1527	0.5289	0.1788	0.1304	0.216	0.3278	0.1825	0.1415	0.1266	0.1788	0.1639	0.3986	0.1415	0.1341	0.2347	0.1602	0.745	0.4842	0.935	0.1713	0.1825	0.2309	0.1229	0.1229	0.4805	0.2235	21.1841	0.149	2.9316	0.7636	0.1825	0.1751	0.1453	0.3092	0.257	0.1341	5.4161	0.1825	0.3241	0.1192	0.3539	0.1937	0.1788	0.2272	1.3373	0.2123	0.2607
L200-C01	488.83	0.5871	0.1064	0.4603	0.1596	0.0839	0.3294	0.2762	0.1432	0.0777	0.0941	0.1227	0.1309	0.3989	0.1432	0.088	0.2332	0.088	0.7753	1.0945	1.3788	0.1739	0.1002	0.581	0.1023	0.0941	0.8101	0.2087	23.6995	0.1105	4.0096	0.9001	0.1596	0.2128	0.1125	0.4951	0.3703	0.1227	7.0802	0.1391	0.313	0.0941	0.4276	0.135	0.178	0.2189	1.97	0.1943	0.2844
L200-C02	510.79	0.4385	0.0783	0.5168	0.1507	0.0783	0.1507	0.2173	0.1135	0.0666	0.0842	0.0881	0.1175	0.1292	0.0842	0.092	0.2173	0.0764	0.8927	0.4033	1.6719	0.137	0.092	0.8555	0.1233	0.1077	0.4718	0.139	15.4778	0.094	2.6371	0.6147	0.1331	0.1507	0.0979	0.417	0.4601	0.1038	6.2667	0.1527	0.2623	0.0822	0.1625	0.1135	0.1253	0.1449	0.9906	0.1449	0.1801
L200-C03	341.65	0.6908	0.1171	0.4127	0.1229	0.1464	0.2986	0.199	0.1464	0.1083	0.0995	0.1112	0.1112	0.3103	0.1024	0.12	0.1668	0.1024	0.4976	0.3805	0.4917	0.1581	0.12	0.6937	0.1259	0.12	0.4215	0.1903	13.9267	0.1112	2.1455	0.6937	0.1464	0.161	0.1083	0.2898	0.2107	0.1171	1.4489	0.1376	0.1522	0.1054	0.2166	0.1259	0.1376	0.1815	1.0566	0.1698	0.1932
L200-C04	346.02	0.8265	0.1301	0.63	0.1532	0.104	0.2052	0.3815	0.1416	0.0867	0.1416	0.1329	0.159	0.1561	0.1127	0.1329	0.2312	0.1012	1.2109	0.2746	3.5894	0.2254	0.1272	0.5086	0.1214	0.104	0.4162	0.1734	25.701	0.1098	3.7541	0.7398	0.1618	0.1647	0.1012	1.234	0.7196	0.1532	3.5952	0.1503	0.2196	0.0954	0.2457	0.1185	0.1474	0.2196	1.1734	0.1792	0.2052
L200-C05	535.25	0.5511	0.0785	0.9211	0.1551	0.0729	0.1719	0.2616	0.1364	0.0841	0.1121	0.1345	0.1308	0.1794	0.1028	0.1046	0.2746	0.0859	1.291	0.6894	1.4162	0.17	0.0972	0.3195	0.0972	0.0915	0.7025	0.1794	24.2188	0.1084	3.8861	0.8407	0.1532	0.1551	0.1102	0.4503	0.3363	0.1252	8.0972	0.1308	0.2802	0.0897	0.3793	0.1719	0.1439	0.1962	1.7282	0.1794	0.2335
L200-C06	375.6	1.5682	0.1331	0.4899	0.2157	0.1065	0.2476	0.3062	0.1944	0.1065	0.1278	0.1305	0.1597	0.2609	0.1118	0.1438	0.2343	0.1118	0.8041	0.6763	5.7429	0.3168	0.0958	0.5298	0.1331	0.1544	0.7748	0.197	20.5221	0.0932	2.9979	0.5538	0.1651	0.1571	0.1305	2.319	0.5964	0.1438	7.4894	0.1384	0.2636	0.1225	0.4952	0.1997	0.181	0.2157	1.5016	0.1864	0.2423
L200-C07	486.45	0.7442	0.0905	0.6537	0.1316	0.0843	0.1953	0.2981	0.1336	0.0822	0.0925	0.1048	0.1172	0.1357	0.0822	0.0987	0.1788	0.0884	0.9415	0.4481	0.8038	0.1233	0.0761	0.4399	0.0822	0.0946	0.3865	0.1562	22.1751	0.0925	3.4043	0.8058	0.1562	0.1316	0.0884	0.3454	0.2344	0.0966	5.238	0.1377	0.2138	0.0699	0.2097	0.1007	0.1151	0.2056	1.1574	0.1953	0.1912
L200-C08	505.04	0.4495	0.0752	0.5841	0.1426	0.0871	0.1505	0.2554	0.1426	0.0673	0.0851	0.1049	0.1089	0.1822	0.0911	0.097	0.1881	0.0812	0.6475	0.3188	1.5484	0.1208	0.0812	0.2871	0.0792	0.0871	0.4138	0.1366	21.8893	0.0851	3.4888	0.8138	0.1168	0.1129	0.0832	0.8257	0.2851	0.0891	4.3402	0.1307	0.1782	0.0772	0.2376	0.103	0.1168	0.1584	1.1682	0.1643	0.1445
L200-C09	329.42	0.7134	0.1062	1.5269	0.2337	0.1184	0.2216	0.3157	0.1579	0.1336	0.1184	0.1457	0.2307	0.2368	0.1457	0.1609	0.2429	0.1154	2.1766	0.8652	1.3752	0.2034	0.1123	0.4159	0.1214	0.1123	0.4827	0.1791	26.9021	0.1184	4.3774	0.9441	0.2186	0.1609	0.1366	0.5009	0.3187	0.1579	6.7635	0.2004	0.2641	0.1184	0.2884	0.1579	0.1852	0.1912	1.7152	0.2307	0.2216
L200-C10	301.97	0.6921	0.1325	1.063	0.2517	0.1258	0.2451	0.2649	0.1821	0.1292	0.149	0.1788	0.1888	0.3047	0.1358	0.1788	0.2848	0.1225	1.7452	0.9074	2.8116	0.2318	0.1126	0.6391	0.1457	0.1623	0.6921	0.1888	20.042	0.1093	2.9904	0.7948	0.2186	0.1855	0.1623	1.2352	0.4173	0.1391	8.4248	0.1523	0.298	0.1391	0.3378	0.1987	0.1755	0.2815	1.4373	0.1888	0.2947
L200-C11	203.01	3.2807	0.2364	0.7832	0.2611	0.1724	0.2857	0.3941	0.2217	0.1823	0.2463	0.2759	0.3005	0.3005	0.1576	0.2118	0.3891	0.1773	1.5024	1.1083	2.6945	0.2759	0.1773	0.3448	0.1823	0.2118	0.7881	0.2759	24.8463	0.1576	3.389	0.6946	0.197	0.2808	0.202	1.1773	0.6404	0.2118	12.8418	0.1872	0.5221	0.202	0.6453	0.202	0.2463	0.2759	2.192	0.3005	0.3941
L200-C12	270.34	0.4957	0.1147	0.651	0.1776	0.1702	0.2108	0.4587	0.1776	0.1332	0.1406	0.1739	0.148	0.1923	0.1665	0.148	0.2552	0.1443	1.0505	0.4254	1.0801	0.1739	0.1591	0.3107	0.1295	0.1221	0.4032	0.196	21.2247	0.1221	3.0849	0.836	0.1517	0.1591	0.1443	0.5105	0.2589	0.1591	9.4842	0.1776	0.3514	0.1369	0.2663	0.1591	0.148	0.2552	1.2096	0.233	0.2145
L200-D01	420.24	0.3403	0.1095	0.6639	0.1927	0.0999	0.2403	0.3688	0.1523	0.1142	0.1356	0.5259	0.138	0.2665	0.1214	0.1023	0.3236	0.1309	1.1755	1.0446	5.6158	0.2903	0.2023	0.7496	0.1452	0.1309	0.8781	0.238	22.6083	0.0952	3.4409	0.8447	0.1689	0.1975	0.1737	0.4521	0.4593	0.1571	17.1139	0.188	0.5306	0.1214	0.4426	0.1832	0.2142	0.2118	1.8799	0.2261	0.2403
L200-D02	569.17	1.5619	0.1511	0.9804	0.2653	0.1247	0.5376	0.5517	0.2108	0.1195	0.1757	0.6676	0.1704	0.8433	0.1265	0.1283	0.5376	0.1406	1.7078	2.4	9.0501	0.4551	0.1142	1.0296	0.1195	0.1898	1.5373	0.2407	26.4721	0.1001	4.5242	0.8258	0.1985	0.2407	0.1933	0.6676	0.6079	0.1985	20.0223	0.1968	0.7116	0.116	0.882	0.2442	0.311	0.2864	3.3821	0.3356	0.4059
L200-D03	522.77	1.2319	0.1167	0.7862	0.1932	0.1014	0.4266	0.4094	0.1683	0.1167	0.1435	0.5853	0.1549	0.6045	0.1148	0.1071	0.3615	0.1205	1.3582	1.7197	5.7884	0.3577	0.0842	0.9431	0.1224	0.1645	1.2606	0.2563	22.993	0.0956	3.8813	0.7747	0.1722	0.2506	0.1569	0.6638	0.4667	0.1664	12.8336	0.1473	0.461	0.1205	0.8168	0.2142	0.241	0.2257	2.7201	0.2372	0.3252
L200-D04	460.37	0.5083	0.1043	0.8971	0.1868	0.0891	0.1716	0.3432	0.1651	0.1043	0.1086	0.5061	0.1825	0.1977	0.1043	0.0869	0.3041	0.0891	1.4488	1.2316	5.1806	0.2498	0.1195	0.8775	0.1195	0.126	0.8884	0.1977	24.5365	0.0847	3.9251	0.7798	0.1629	0.1607	0.1173	0.4583	0.315	0.1607	16.2237	0.1499	0.4952	0.1216	0.4974	0.1759	0.2064	0.1998	2.0896	0.2259	0.2194
L200-D05	449.92	0.8935	0.0956	1.2802	0.1934	0.0822	0.2689	0.3067	0.1534	0.0822	0.1022	0.3289	0.1578	0.2667	0.0889	0.1711	0.2978	0.0978	2.1026	0.9513	1.4647	0.14	0.0845	0.4445	0.1	0.08	0.6957	0.1711	22.3684	0.0911	3.5406	0.8957	0.1578	0.1356	0.1045	0.5201	0.2534	0.1022	7.1146	0.1222	0.3023	0.08	0.3534	0.1578	0.1467	0.2267	1.7625	0.2356	0.1467
L200-D06	418.76	0.7164	0.117	0.7833	0.16	0.1027	0.2603	0.3678	0.1504	0.0907	0.1122	0.5277	0.1504	0.351	0.1051	0.0955	0.2364	0.1003	1.163	1.385	4.5587	0.2436	0.1075	0.5086	0.1098	0.1242	0.7856	0.1934	21.7164	0.1003	3.3002	0.7355	0.1958	0.1743	0.16	0.3582	0.3009	0.1337	13.4468	0.1576	0.4466	0.1051	0.4991	0.1887	0.2101	0.2269	2.0465	0.1887	0.234
L200-D07	459.18	0.8363	0.0958	0.9822	0.1786	0.0958	0.2461	0.3572	0.1546	0.1024	0.1002	0.4181	0.1633	0.3833	0.1176	0.122	0.2962	0.0958	1.8184	1.6747	5.1526	0.2352	0.1176	0.7056	0.1045	0.1307	0.9408	0.1764	24.9465	0.1045	4.0245	0.7666	0.1895	0.1808	0.1503	0.5466	0.4486	0.1633	12.9033	0.172	0.466	0.098	0.4791	0.1655	0.1829	0.1982	2.3607	0.22	0.2831
L200-D08	373.37	1.0874	0.1178	1.4195	0.2464	0.1018	0.2946	0.458	0.1393	0.1098	0.1393	0.5089	0.2357	0.3294	0.1098	0.1553	0.4339	0.1339	2.1801	1.8132	3.6237	0.2357	0.0964	0.5517	0.1125	0.1419	0.9722	0.2277	25.0151	0.1098	3.9451	0.9133	0.2116	0.2169	0.1714	1.0177	0.3964	0.1366	10.8309	0.1553	0.3776	0.1366	0.6374	0.2303	0.2571	0.2651	2.6033	0.2571	0.2919
L200-D09	307.98	0.828	0.1396	0.7046	0.1786	0.1136	0.2727	0.4578	0.2046	0.1461	0.1559	0.5877	0.1623	0.3637	0.1364	0.1396	0.25	0.1461	1.0812	1.5228	5.7114	0.3085	0.1039	0.5357	0.1461	0.1396	0.8702	0.2078	24.4236	0.1136	3.5911	0.8669	0.25	0.2175	0.2175	0.4676	0.5098	0.1883	19.2544	0.1786	0.7111	0.1331	0.4903	0.2143	0.2533	0.25	2.367	0.2338	0.276
L200-D10	291.5	2.4083	0.1647	0.6827	0.1818	0.1304	0.4048	0.4254	0.1475	0.1132	0.1715	0.319	0.2024	0.3156	0.1475	0.1681	0.3877	0.1304	1.1184	0.6106	2.6004	0.2676	0.0995	0.5866	0.1235	0.1441	0.3465	0.2058	23.2009	0.1029	3.3894	0.6003	0.1647	0.1509	0.1818	0.4288	0.3362	0.1304	5.2488	0.1921	0.2916	0.1235	0.2161	0.1338	0.1612	0.2539	1.3619	0.2024	0.2607
L200-D11	224.7	0.81	0.1691	0.7922	0.2359	0.138	0.3071	0.5029	0.2848	0.138	0.1602	0.6053	0.2537	0.3783	0.178	0.1558	0.3071	0.1914	1.0547	1.1616	3.0174	0.3071	0.1736	0.5118	0.1558	0.1958	0.672	0.2492	24.0189	0.1602	3.636	0.8767	0.2359	0.2759	0.2181	0.6943	0.3872	0.1914	14.5529	0.2092	0.5385	0.138	0.4317	0.2225	0.2804	0.2848	1.9893	0.3249	0.3115
L200-D12	292.27	0.7904	0.1471	0.5201	0.2019	0.1232	0.2498	0.3661	0.2395	0.1232	0.1334	0.479	0.154	0.2566	0.1369	0.1369	0.2703	0.1574	0.7254	1.2249	4.3042	0.3148	0.1779	0.3969	0.1369	0.1369	0.698	0.2463	21.9967	0.1026	3.4146	0.8998	0.2053	0.219	0.1642	0.4277	0.4003	0.1745	12.5671	0.1711	0.4482	0.13	0.3764	0.1882	0.2327	0.2874	2.005	0.26	0.2635
L200-E01	611.56	0.6361	0.0899	0.6442	0.1488	0.0703	0.2142	0.4251	0.103	0.0687	0.0867	0.0834	0.0883	0.2551	0.0932	0.0916	0.175	0.0719	0.9468	0.3417	0.6541	0.1243	0.0818	0.3597	0.0801	0.0916	0.435	0.1913	27.1059	0.0899	4.948	0.9124	0.1177	0.1324	0.0834	0.224	0.1913	0.1096	5.1229	0.1292	0.2404	0.0703	0.1586	0.0867	0.1096	0.1864	1.4847	0.1406	0.1406
L200-E02	693.62	0.803	0.0836	0.5709	0.1831	0.0706	0.2797	0.3547	0.0937	0.0678	0.075	0.0865	0.0822	0.2855	0.0923	0.0706	0.1817	0.062	0.9054	0.5406	0.8737	0.1197	0.0779	0.4484	0.0779	0.0706	0.5176	0.1831	26.8822	0.0764	4.7404	0.8694	0.1269	0.1341	0.1024	0.3186	0.186	0.0894	4.6611	0.1341	0.209	0.0822	0.1932	0.0966	0.1211	0.1802	1.6017	0.1831	0.1701
L200-E03	509.06	1.1629	0.1179	0.6168	0.4086	0.108	0.3556	0.3261	0.1473	0.0746	0.1198	0.1375	0.1375	0.442	0.1297	0.1179	0.2416	0.0825	1.0038	0.3831	4.4258	0.1847	0.1159	0.6522	0.1179	0.112	0.5854	0.1493	20.7148	0.0923	3.6008	0.5893	0.1277	0.112	0.0884	2.0233	0.4754	0.1218	4.469	0.1139	0.2868	0.1198	0.2966	0.1198	0.1552	0.1807	1.0254	0.1689	0.1355
L200-E04	544.45	0.5969	0.0918	0.7935	0.1396	0.079	0.2039	0.2975	0.1341	0.079	0.0845	0.0918	0.1231	0.2645	0.0827	0.1212	0.1947	0.0863	1.192	0.641	0.9184	0.1176	0.0845	0.4096	0.0937	0.09	0.5033	0.1598	21.8772	0.0918	3.5559	0.7182	0.1598	0.158	0.1029	0.5602	0.2682	0.0973	4.5808	0.1359	0.2388	0.1084	0.2278	0.1378	0.1378	0.1616	1.4308	0.1635	0.1929
L200-E05	279.97	1.7788	0.1607	0.7787	0.1822	0.1143	0.25	0.4679	0.1464	0.1322	0.1464	0.1893	0.2357	0.1857	0.1393	0.2107	0.4215	0.1143	1.6216	0.7251	1.218	0.1929	0.1322	0.7644	0.1572	0.1679	0.5965	0.2072	24.7172	0.125	4.1362	0.6179	0.1536	0.2607	0.1643	0.3572	0.3536	0.1786	9.6761	0.1572	0.3179	0.1714	0.5929	0.1893	0.1965	0.2286	1.9395	0.2143	0.2893
L200-E06	298.67	2.3638	0.1674	0.5625	0.2377	0.1339	0.2545	0.2946	0.1607	0.1105	0.1507	0.1272	0.1641	0.3047	0.144	0.1674	0.2109	0.1406	0.914	0.3951	4.5769	0.2243	0.1105	0.5257	0.1841	0.1641	0.5725	0.221	16.3925	0.1239	2.2198	0.5324	0.1641	0.1574	0.1339	2.1796	0.8036	0.2143	3.7064	0.1641	0.2913	0.1607	0.3549	0.1641	0.1574	0.2612	0.8337	0.1875	0.1875
L200-E07	496.23	0.7799	0.0947	0.9552	0.1693	0.0887	0.1975	0.3063	0.1149	0.0786	0.1008	0.1008	0.139	0.2217	0.1048	0.1088	0.2499	0.0907	1.5396	0.4675	0.6731	0.1149	0.1451	0.2559	0.0826	0.0927	0.4111	0.1854	25.99	0.1048	4.3972	0.8101	0.1592	0.1632	0.0967	0.2801	0.3043	0.1129	5.0662	0.1431	0.2257	0.0806	0.2519	0.133	0.1471	0.2116	1.5134	0.1854	0.1773
L200-E08	256.55	1.9489	0.1715	0.5301	0.1793	0.1208	0.2962	0.4171	0.1832	0.113	0.1715	0.1871	0.1988	0.2261	0.1637	0.1715	0.2261	0.1481	0.7874	0.343	7.7333	0.343	0.1559	0.3664	0.152	0.1442	0.5847	0.2339	22.0227	0.1286	3.0325	0.7601	0.1793	0.152	0.1598	1.984	1.8242	0.2339	4.9619	0.2027	0.2573	0.1559	0.3625	0.1559	0.2066	0.2495	1.1148	0.2417	0.269
L200-E09	319.88	2.1977	0.1751	0.7472	0.2657	0.1188	0.2782	0.3939	0.1719	0.125	0.1313	0.1719	0.1407	0.2876	0.125	0.1344	0.3408	0.125	1.0535	0.7753	2.501	0.2126	0.1063	0.4064	0.1313	0.1219	0.6034	0.1782	22.2522	0.1282	3.4326	0.7722	0.2063	0.1657	0.1688	1.0973	0.3939	0.125	5.3739	0.1688	0.2689	0.1626	0.5627	0.1907	0.2063	0.2313	1.6412	0.2032	0.222
L200-E10	435.98	0.6147	0.094	1.1216	0.1835	0.0849	0.1904	0.2408	0.1307	0.0849	0.078	0.1193	0.1445	0.1697	0.0986	0.1193	0.2064	0.1032	1.6813	0.5597	0.4863	0.1353	0.0826	0.3188	0.0803	0.1009	0.3211	0.1697	23.1158	0.0963	3.6401	1.0023	0.1422	0.1353	0.094	0.3303	0.1812	0.0986	2.4841	0.1101	0.1812	0.078	0.2317	0.133	0.133	0.1789	1.3074	0.1445	0.1674
L200-E11	399.89	0.8027	0.1125	1.0153	0.1876	0.09	0.175	0.2701	0.1325	0.095	0.09	0.1225	0.1901	0.2601	0.1	0.12	0.18	0.1	1.7855	0.2876	3.496	0.18	0.0925	0.3801	0.0875	0.1275	0.3801	0.165	22.8563	0.1	3.7385	0.9503	0.1575	0.1225	0.1175	1.4004	0.6952	0.1275	3.811	0.14	0.2626	0.095	0.2776	0.125	0.1225	0.1775	0.9803	0.17	0.13
L200-E12	226.8	0.7981	0.1455	0.7055	0.1984	0.1499	0.2249	0.2469	0.172	0.1676	0.1676	0.1587	0.1676	0.1631	0.1367	0.1764	0.194	0.1323	0.9303	0.3968	0.582	0.1455	0.1367	0.3616	0.1631	0.1896	0.3439	0.2072	22.6767	0.1499	3.1702	0.8157	0.2072	0.172	0.172	0.6437	0.2425	0.172	1.0141	0.1764	0.1808	0.1455	0.2425	0.1676	0.1676	0.2116	0.9788	0.2337	0.1808
L200-F01	622.13	0.9114	0.1029	0.5369	0.1591	0.0804	0.2813	0.3392	0.1334	0.0707	0.0836	0.3006	0.1109	0.3215	0.0964	0.0852	0.2041	0.082	0.9773	0.8053	3.3482	0.2427	0.0739	0.5979	0.0852	0.0932	0.8471	0.2057	25.5318	0.0755	4.4252	0.8664	0.1495	0.1575	0.1157	0.3199	0.2363	0.0868	9.31	0.1334	0.2958	0.0723	0.3247	0.135	0.1527	0.2202	2.08	0.1993	0.1688
L200-F02	599.64	1.4109	0.1117	0.7871	0.1951	0.0951	0.3002	0.487	0.1351	0.0784	0.0984	0.3836	0.1484	0.2852	0.0967	0.1334	0.3119	0.0817	1.4642	0.9656	3.6622	0.2051	0.1017	0.8939	0.1034	0.0951	0.7555	0.2101	25.4487	0.1017	4.2859	0.8138	0.1434	0.2035	0.1201	0.2735	0.3052	0.1217	8.822	0.1384	0.2885	0.1051	0.3018	0.1418	0.1784	0.2201	2.238	0.1985	0.1851
L200-F03	568.52	0.4978	0.0809	0.2586	0.0932	0.0704	0.2357	0.2339	0.0879	0.0721	0.0862	0.1812	0.0792	0.204	0.0774	0.0704	0.1249	0.0651	0.3166	0.3113	1.7959	0.1249	0.0739	0.679	0.1091	0.0792	0.3096	0.1284	16.6082	0.0915	2.8566	0.547	0.1249	0.1179	0.0844	0.2357	0.1653	0.095	1.5831	0.1513	0.139	0.0756	0.0967	0.0792	0.0932	0.1495	0.8672	0.1108	0.1302
L200-F04	417.31	0.8675	0.1006	1.2748	0.1629	0.1006	0.2181	0.357	0.1438	0.0935	0.0959	0.3714	0.2468	0.3019	0.115	0.1318	0.2756	0.1078	2.1615	1.1598	2.7797	0.2085	0.2276	0.8507	0.1222	0.151	0.6949	0.1941	25.8322	0.0887	4.311	0.8818	0.2085	0.1749	0.1342	0.4769	0.3187	0.1246	7.6394	0.1534	0.3451	0.103	0.3019	0.1701	0.1941	0.2181	1.8667	0.23	0.2157
L200-F05	399.33	0.7888	0.1227	0.3581	0.1127	0.0952	0.2705	0.3381	0.1477	0.0851	0.0801	0.1803	0.1202	0.2905	0.1127	0.0927	0.2053	0.0927	0.621	0.3656	1.197	0.1503	0.0902	0.3205	0.1177	0.0977	0.3306	0.1828	23.9928	0.1027	3.3832	0.7463	0.1728	0.1528	0.1152	0.2329	0.2379	0.1077	2.2738	0.1352	0.2554	0.0902	0.1828	0.1302	0.1477	0.1828	1.2145	0.1427	0.1477
L200-F06	336.65	1.3011	0.1307	1.01	0.1842	0.1426	0.2465	0.5169	0.1961	0.1069	0.1604	0.499	0.2109	0.2733	0.1634	0.1545	0.3921	0.1485	1.613	1.3931	4.0458	0.2644	0.1485	0.3951	0.1218	0.1307	0.8822	0.2406	27.649	0.1366	4.5656	1.0367	0.1812	0.2555	0.1753	0.6535	0.4218	0.1931	11.8046	0.1663	0.4634	0.1248	0.5525	0.2139	0.2139	0.3178	2.2308	0.2198	0.2584
L200-F07	461.17	0.7633	0.1106	0.8912	0.1474	0.0867	0.206	0.3361	0.1583	0.0781	0.1258	0.3057	0.1518	0.2342	0.0954	0.1128	0.3231	0.1019	1.5873	0.8804	1.9364	0.167	0.0911	0.4142	0.1019	0.1063	0.5291	0.167	22.7289	0.1019	3.6147	0.8782	0.1626	0.1431	0.1128	0.4098	0.2364	0.1279	4.9135	0.1323	0.232	0.0911	0.3556	0.1409	0.1605	0.1995	1.6306	0.1778	0.1626
L200-F08	205.49	2.2775	0.2823	0.4526	0.2239	0.2093	0.3553	0.618	0.2531	0.1898	0.2093	0.5451	0.1898	0.2677	0.1995	0.2093	0.365	0.2044	0.6667	0.8419	3.3092	0.3261	0.2093	0.292	0.1752	0.2579	0.5889	0.2871	25.0967	0.2239	3.4017	0.8176	0.2044	0.2433	0.2287	0.6132	0.3942	0.2433	9.2075	0.219	0.4283	0.2093	0.4185	0.2433	0.2725	0.2969	1.9223	0.3407	0.2969
L200-F09	305.04	0.8294	0.1377	0.5999	0.1737	0.1246	0.259	0.3508	0.1705	0.1508	0.1311	0.4098	0.1541	0.2918	0.1541	0.1246	0.2459	0.1279	0.7966	0.636	2.2817	0.2426	0.141	0.3901	0.1377	0.1311	0.5966	0.1803	19.7842	0.141	2.9537	0.7704	0.2	0.1737	0.1606	0.3901	0.3213	0.1606	7.776	0.1574	0.3704	0.1246	0.2918	0.1869	0.2033	0.1934	1.4883	0.2196	0.177
L200-F10	288.58	0.7242	0.1455	0.8802	0.2183	0.1282	0.2426	0.402	0.1559	0.1247	0.1317	0.3119	0.1906	0.2148	0.1386	0.1594	0.2114	0.1144	1.2752	0.8698	2.0272	0.2079	0.2703	0.3396	0.1178	0.1213	0.4643	0.1802	22.4793	0.1247	3.2885	0.7485	0.2391	0.1837	0.1351	0.3257	0.2703	0.1351	3.5277	0.1525	0.1871	0.1629	0.3119	0.1421	0.1871	0.2634	1.4416	0.1837	0.1906
L200-F11	288.87	1.0247	0.1592	0.8897	0.2423	0.135	0.2492	0.4119	0.18	0.1454	0.1385	0.3323	0.1696	0.3842	0.1489	0.1246	0.2527	0.135	1.267	0.7997	2.167	0.2389	0.1489	0.3081	0.1246	0.135	0.4916	0.2181	19.7006	0.1281	2.894	0.8654	0.2181	0.1662	0.1454	0.2492	0.2458	0.1662	7.7888	0.1731	0.3877	0.1177	0.315	0.1835	0.1765	0.2319	1.5058	0.2423	0.1662
L200-F12	287.89	0.7016	0.1216	0.8024	0.1771	0.1285	0.2501	0.3717	0.1633	0.1146	0.1216	0.1771	0.1737	0.2501	0.132	0.1771	0.2293	0.125	1.1949	0.3126	0.6079	0.1737	0.1285	0.3265	0.1181	0.1077	0.264	0.1841	19.7538	0.1424	2.9282	0.8163	0.1737	0.1702	0.1285	0.191	0.1771	0.1563	1.2123	0.1633	0.1702	0.1077	0.1563	0.1598	0.1598	0.198	1.0907	0.1841	0.1667
L200-G01	765.29	1.1669	0.0836	0.9839	0.5031	0.0954	0.2666	0.3097	0.1882	0.0902	0.1424	0.1803	0.1346	0.6703	0.1254	0.115	0.362	0.0928	1.7274	1.0636	19.4356	0.5789	0.0902	0.8546	0.1071	0.1646	2.156	0.2391	27.5018	0.0889	4.8818	0.8794	0.1895	0.1542	0.1176	7.4873	3.6365	0.2025	19.5206	0.1424	0.6377	0.1241	1.4517	0.2417	0.277	0.2744	1.8333	0.2221	0.2992
L200-G02	542.79	0.7793	0.0755	0.5674	0.1584	0.0811	0.2266	0.3224	0.1216	0.0755	0.1124	0.1363	0.1216	0.3832	0.0884	0.1013	0.2395	0.0811	0.9322	0.5914	2.0174	0.1548	0.1179	0.5988	0.0958	0.0958	0.7185	0.1658	22.333	0.0755	3.9592	0.7904	0.1548	0.1658	0.0866	0.8862	0.3832	0.1032	10.2435	0.1345	0.3666	0.0884	0.2856	0.1161	0.1474	0.2137	1.6821	0.164	0.199
L200-G03	571.7	1.2367	0.1032	0.8099	0.5895	0.1067	0.2939	0.2624	0.1714	0.0927	0.1627	0.1382	0.1224	0.5912	0.1207	0.1294	0.2746	0.1067	1.2961	0.6962	14.1454	0.3988	0.1032	0.6909	0.0997	0.1172	1.032	0.1837	21.77	0.0805	3.5053	0.7189	0.1522	0.1137	0.0962	7.1243	1.2961	0.1382	14.5215	0.1277	0.4968	0.1347	0.5108	0.1469	0.1627	0.2012	1.137	0.2012	0.2151
L200-G04	437.87	0.7582	0.1028	0.4431	0.2192	0.0936	0.2558	0.3311	0.1804	0.0936	0.1507	0.137	0.1188	0.3334	0.1073	0.0982	0.1507	0.0868	0.7696	0.2124	12.4443	0.354	0.1347	0.4864	0.1073	0.1142	0.7765	0.185	24.5529	0.0936	3.5604	0.7308	0.185	0.1393	0.1165	3.3526	2.889	0.1918	10.7475	0.1325	0.3928	0.1393	0.4522	0.1302	0.1759	0.2101	1.2013	0.1918	0.1804
L200-G05	417.83	1.0722	0.1627	0.5194	0.2154	0.0981	0.2704	0.4284	0.1747	0.0814	0.1245	0.1963	0.1292	0.2992	0.1005	0.1173	0.3016	0.0933	0.7898	0.493	2.1444	0.1915	0.3279	0.3255	0.0981	0.1149	0.6199	0.2298	27.418	0.0933	4.0591	0.9741	0.2345	0.1532	0.1436	1.0626	0.438	0.1675	9.4872	0.1508	0.3446	0.1197	0.3159	0.1556	0.158	0.2393	1.6993	0.1939	0.2106
L200-G06	425.85	1.2774	0.1268	0.8595	0.2184	0.0986	0.2935	0.4978	0.1526	0.0892	0.1057	0.1526	0.1714	0.317	0.101	0.1198	0.4368	0.1221	1.6179	0.4391	1.4207	0.155	0.1362	0.5049	0.1456	0.1127	0.4861	0.2278	26.5656	0.1174	4.0859	0.8759	0.1691	0.2066	0.1221	1.4418	0.2513	0.1315	4.68	0.1362	0.2372	0.0963	0.2043	0.1526	0.1315	0.209	1.5569	0.1879	0.155
L200-G07	347.26	1.8632	0.1613	0.861	0.2419	0.1181	0.311	0.4464	0.2016	0.1123	0.1584	0.1555	0.2045	0.671	0.1353	0.1353	0.288	0.1411	1.3247	0.6681	2.0503	0.1641	0.1497	0.3945	0.1296	0.1325	0.6969	0.2016	21.9692	0.1181	3.4182	0.7372	0.2016	0.1843	0.1325	0.91	0.4521	0.1901	9.1258	0.1929	0.3772	0.1382	0.334	0.1641	0.1901	0.2448	1.5608	0.239	0.3312
L200-G08	373.22	1.7282	0.1634	0.6457	0.1688	0.1125	0.2813	0.5359	0.1688	0.1045	0.1313	0.1661	0.1393	0.5627	0.1099	0.1474	0.2572	0.1286	1.1093	0.6297	1.0396	0.1715	0.1072	0.2492	0.1045	0.134	0.5144	0.2304	23.8411	0.0965	3.5796	0.9458	0.1768	0.2063	0.1259	0.3456	0.3054	0.1393	9.4234	0.1554	0.3885	0.1018	0.2947	0.1581	0.1393	0.2143	1.8059	0.201	0.2331
L200-G09	241.92	1.6535	0.1819	0.5994	0.215	0.1364	0.2646	0.5539	0.1819	0.1447	0.1736	0.2398	0.1984	0.5332	0.1984	0.1695	0.2728	0.1695	0.9673	0.7275	1.6287	0.2935	0.1777	0.2728	0.1488	0.1695	0.7689	0.2439	26.1414	0.1281	3.4227	1.0706	0.2067	0.2604	0.215	0.463	0.5952	0.2026	15.1871	0.1943	0.5126	0.1488	0.4506	0.2026	0.2315	0.2811	2.1412	0.277	0.3348
L200-G10	273.81	1.5339	0.1424	0.8071	0.2301	0.157	0.2995	0.4346	0.2009	0.1242	0.1607	0.168	0.179	0.4748	0.1351	0.157	0.252	0.1315	1.1906	0.3762	6.9865	0.2812	0.1388	0.2666	0.1278	0.1424	0.5807	0.1899	23.633	0.157	3.6266	1.0409	0.1936	0.2118	0.1278	1.921	1.7019	0.241	5.8434	0.1899	0.3214	0.1826	0.3616	0.168	0.1753	0.2447	1.3038	0.2337	0.2337
L200-G11	273.97	1.449	0.1825	0.5548	0.1898	0.1569	0.3467	0.5292	0.1752	0.1387	0.1569	0.1606	0.1606	0.5694	0.1642	0.1533	0.3175	0.1387	1.0147	0.4051	0.6789	0.1898	0.1423	0.2117	0.1314	0.1277	0.3759	0.1971	23.2832	0.1533	3.1098	0.8833	0.1898	0.2336	0.1387	0.3723	0.2628	0.146	5.0881	0.1715	0.3358	0.1314	0.2117	0.146	0.1934	0.2372	1.3906	0.1971	0.2044
L200-G12	212.56	1.7737	0.1882	0.5034	0.2399	0.1694	0.3387	0.5316	0.2446	0.1647	0.1741	0.2211	0.1882	0.6539	0.1976	0.1647	0.2964	0.1835	0.7622	0.4705	0.9645	0.2164	0.1505	0.3576	0.1835	0.2493	0.5081	0.2635	18.4563	0.207	2.6299	0.8751	0.2635	0.207	0.1929	0.5034	0.3717	0.2023	7.2028	0.207	0.4281	0.1929	0.2682	0.2023	0.2117	0.2964	1.3502	0.2446	0.287
L200-H01	612.01	0.8725	0.085	0.7157	0.2059	0.0801	0.2157	0.3203	0.1536	0.0833	0.1193	0.0915	0.1405	0.4379	0.0817	0.1029	0.2402	0.0752	1.1879	0.3758	9.6371	0.2614	0.0882	1.1454	0.1274	0.1274	0.9722	0.1748	22.6041	0.1029	3.9934	0.8562	0.1487	0.1487	0.0964	2.5931	2.0719	0.1765	9.2351	0.1634	0.3415	0.0931	0.3186	0.1144	0.165	0.2075	1.1225	0.1863	0.1683
L200-H02	199.37	15.6991	0.5969	0.6721	0.2959	0.1856	0.3712	0.5317	0.2458	0.1755	0.2909	0.2408	0.2408	0.8226	0.2408	0.2959	0.4063	0.1856	1.3342	0.3762	6.9116	0.306	0.1455	0.2307	0.2408	0.1956	0.647	0.2909	22.8665	0.1605	2.7486	0.6821	0.2107	0.2658	0.2006	1.4596	1.1737	0.2708	5.2514	0.1956	0.2909	0.2959	0.5166	0.2357	0.2006	0.2959	1.1887	0.2508	0.2408
L200-H03	469.32	2.7892	0.1662	0.9588	0.6712	0.1215	0.3878	0.3558	0.1747	0.1193	0.1982	0.179	0.2131	1.1037	0.1215	0.1555	0.4624	0.1172	1.7238	1.2294	10.2361	0.3281	0.1044	0.6073	0.1278	0.1555	1.515	0.2195	24.9405	0.1172	3.8524	0.7841	0.2152	0.196	0.1364	3.3304	0.9844	0.1811	10.104	0.1385	0.3942	0.1726	0.7202	0.2131	0.2663	0.2898	1.9709	0.3004	0.3303
L200-H04	377.77	1.3818	0.1615	0.7333	0.1747	0.1112	0.5347	0.4844	0.1535	0.1059	0.1456	0.1191	0.1721	0.6856	0.1297	0.1482	0.3256	0.1482	1.3289	0.4024	5.7839	0.2409	0.1191	1.1171	0.1562	0.135	0.5691	0.1985	20.7904	0.1218	3.256	0.6247	0.1853	0.1482	0.1085	1.7153	1.1277	0.18	4.8125	0.1482	0.2806	0.1271	0.2621	0.1244	0.1959	0.2065	0.8021	0.1879	0.1827
L200-H05	371.6	0.5248	0.1722	0.479	0.1803	0.0942	0.2287	0.2691	0.1668	0.113	0.1642	0.1507	0.1292	0.5759	0.148	0.0996	0.7239	0.1722	0.6701	0.3229	4.1307	0.3337	0.218	0.1991	0.1103	0.113	0.4306	0.1695	18.4443	0.1023	2.6426	0.6754	0.1776	0.1534	0.1103	1.4451	1.0791	0.2018	2.4569	0.1319	0.1857	0.1803	0.4629	0.1561	0.1749	0.2314	0.9069	0.1911	0.1534
L200-H06	337.1	1.7176	0.1454	0.3678	0.1543	0.1127	0.3322	0.3767	0.1721	0.1305	0.1394	0.1424	0.1454	0.4005	0.1454	0.1187	0.2225	0.1009	0.4479	0.175	2.5126	0.175	0.1038	0.7446	0.1305	0.1216	0.4301	0.1839	17.44	0.1157	2.3554	0.6526	0.1661	0.1572	0.1276	0.6289	0.6437	0.1572	2.1655	0.1394	0.2017	0.1572	0.2047	0.1187	0.1454	0.175	0.8158	0.1958	0.1365
L200-H07	393.59	1.0493	0.1067	0.8029	0.2719	0.1296	0.9553	0.3659	0.1982	0.1143	0.155	0.1347	0.1524	0.3151	0.122	0.1397	0.2287	0.1093	1.2856	0.3176	9.8428	0.3354	0.1118	0.437	0.122	0.1296	0.8207	0.2261	24.264	0.122	3.6866	0.9223	0.1855	0.1347	0.1372	1.8395	2.0707	0.2134	10.6965	0.1601	0.3633	0.1042	0.5183	0.1575	0.1804	0.2083	1.217	0.1982	0.1906
L200-H08	389.85	0.849	0.1411	0.8054	0.2052	0.1077	0.7054	0.3925	0.1667	0.0975	0.1565	0.1565	0.1616	0.3078	0.1206	0.118	0.2719	0.1359	1.203	0.4258	10.8606	0.3745	0.2745	0.2668	0.1077	0.1462	0.749	0.159	24.0477	0.1	3.4962	0.7798	0.2103	0.1385	0.1308	2.8857	2.2624	0.1898	11.1761	0.1436	0.3668	0.1308	0.4592	0.1334	0.1642	0.2488	1.4518	0.1975	0.2257
L200-H09	397.42	1.2757	0.1308	0.6089	0.1434	0.1007	0.2667	0.4479	0.1384	0.0906	0.1157	0.1334	0.1409	0.2114	0.1132	0.1183	0.2793	0.1057	0.8656	0.3598	3.9581	0.1812	0.1132	0.2642	0.0906	0.1007	0.4454	0.1912	23.5446	0.1107	3.5706	1.004	0.1636	0.1359	0.1132	1.3286	0.463	0.1208	4.3556	0.1434	0.2265	0.1057	0.1887	0.1661	0.1661	0.2038	1.3437	0.1661	0.1384
L200-H10	302.29	0.9891	0.1522	0.7179	0.1786	0.1356	0.2183	0.4003	0.1522	0.1323	0.1224	0.1323	0.1389	0.2117	0.1257	0.1522	0.268	0.1456	1.0685	0.268	1.8591	0.1819	0.1158	0.2382	0.1257	0.1323	0.3407	0.1919	23.5999	0.1356	3.2915	0.8204	0.1886	0.1621	0.1257	0.5789	0.3176	0.1191	2.8185	0.1323	0.2117	0.1026	0.215	0.1555	0.1489	0.2051	1.0718	0.1687	0.1621
L200-H11(WT)	457.72	1.4966	0.1202	0.6642	0.568	0.1027	0.2316	0.3212	0.1879	0.0961	0.118	0.1311	0.1486	0.4828	0.1136	0.1289	0.2469	0.0896	0.9984	0.5768	3.7447	0.2141	0.0961	0.4719	0.1158	0.0939	0.8105	0.1944	24.6658	0.0896	3.7731	0.8324	0.1835	0.201	0.1005	0.6751	0.5134	0.1245	7.7842	0.1311	0.3037	0.1267	0.4348	0.1529	0.1682	0.2207	1.4944	0.2491	0.2425
L200-H12(pET28)	240.77	1.0965	0.2077	0.5856	0.2118	0.1578	0.3572	0.6189	0.1828	0.1412	0.1828	0.3987	0.2077	0.2492	0.1786	0.1869	0.3613	0.1703	0.9054	0.5316	1.8773	0.2451	0.1952	0.2118	0.1952	0.1578	0.4195	0.2367	22.9808	0.1412	3.2895	0.9553	0.2077	0.2035	0.1786	0.3655	0.2783	0.1828	7.7087	0.1994	0.3738	0.162	0.27	0.2118	0.1952	0.216	1.6946	0.2534	0.216
[truncated: 193 more columns]

## Sheet: R101
Sample Name	Mean Intensity	m/z 115.18	m/z 117.19	m/z 117.74	m/z 118.15	m/z 118.70	m/z 119.15	m/z 119.66	m/z 120.15	m/z 122.14	m/z 123.11	m/z 124.13	m/z 127.12	m/z 129.12	m/z 130.12	m/z 131.21	m/z 132.97	m/z 133.20	m/z 134.20	m/z 135.14	m/z 136.12	m/z 137.11	m/z 138.13	m/z 139.12	m/z 140.13	m/z 141.14	m/z 141.78	m/z 144.12	m/z 145.12	m/z 146.12	m/z 147.12	m/z 148.14	m/z 152.12	m/z 153.11	m/z 155.14	m/z 156.11	m/z 157.13	m/z 158.12	m/z 161.18	m/z 162.14	m/z 163.14	m/z 164.14	m/z 165.15	m/z 166.15	m/z 169.15	m/z 170.16	m/z 172.11	m/z 172.77	m/z 173.11
R101-A01	226.07	0.7476	88.3323	0.8405	71.271	1.128	3.5476	0.5529	0.5706	2.1542	0.8272	0.5441	0.4777	0.4114	0.8626	0.4335	1.3536	0.6193	0.3937	1.4819	0.8183	4.7641	0.6149	1.1014	23.2852	0.8935	0.3671	0.7874	0.5574	24.6387	3.99	1.0528	1.7296	1.1943	7.0068	3.4945	0.4645	0.4822	0.4025	0.522	0.5043	1.4421	0.5087	0.4379	1.6323	0.4423	381.763	3.353	50.9186
R101-A02	306.26	1.3583	127.386	0.9045	151.249	1.8187	8.2871	0.7183	0.7477	2.1942	0.7086	0.5159	0.48	0.4441	0.5159	0.5714	2.7428	2.093	0.3984	2.4195	0.8718	1.6816	0.4963	0.4702	77.4446	2.7558	0.5061	0.7314	0.3951	21.0999	3.6864	1.0743	1.6587	0.4245	4.6399	9.7696	0.5747	0.5584	0.4637	0.4963	0.4669	1.9755	0.3951	0.4147	1.1559	0.3396	329.19	2.8832	43.8193
R101-A03	177.08	1.1746	92.6995	0.96	62.6731	1.1803	2.9479	0.8301	0.9487	2.0612	0.9092	0.7228	0.7624	0.5986	0.8584	0.6551	1.0899	0.7059	0.5478	1.1012	1.9878	2.2194	0.6325	0.6438	51.1132	1.9088	0.672	0.6946	0.4857	10.6112	2.1911	0.768	2.0387	0.9657	4.1564	5.8223	0.8527	0.7341	0.6325	0.6043	0.5817	1.0109	0.672	0.7172	1.0278	0.672	191.43	1.7902	23.7467
R101-A04	246.67	1.9216	187.075	1.3175	168.439	2.0919	8.3917	0.7257	0.6811	2.177	0.6365	0.4459	0.4824	0.3892	0.6365	0.6405	2.5662	0.8676	0.3608	1.9054	0.9527	3.9688	0.5878	0.4662	67.1259	2.2581	0.4581	0.5149	0.5027	16.4551	3.0243	1.0662	2.2986	1.0338	2.3432	6.2796	0.5838	0.5473	0.3892	0.4946	0.5797	1.273	0.4176	0.4297	1.5567	0.3973	276.332	2.1689	34.8399
R101-A05	192.99	1.254	158.98	1.1814	151.067	1.938	6.4149	0.8239	0.741	1.5649	0.6788	0.5596	0.5389	0.4715	0.6788	0.6581	2.482	0.855	0.4145	1.881	0.7669	2.3732	0.5389	0.513	64.5328	2.3629	0.6322	0.5389	0.4612	8.612	1.6011	0.6633	1.2747	0.7721	2.6478	6.6067	0.6114	0.6943	0.4974	0.5182	0.5544	0.8964	0.4404	0.4612	0.9845	0.4923	186.997	1.5441	22.473
R101-A06	163.03	0.6931	74.1643	0.7545	82.5984	1.0857	3.9441	0.6195	0.7238	1.466	1.2022	0.4968	0.7606	0.6011	0.9569	0.5888	1.4108	0.6625	0.552	1.6316	0.9937	7.8329	0.9446	0.7545	19.8614	0.9814	0.5888	0.6257	0.6931	24.0324	4.1894	1.4169	2.7173	2.11	11.0839	2.6621	0.5275	0.5643	0.503	0.6686	0.7299	1.9628	0.7299	0.6747	2.061	0.6134	368.479	2.8768	47.476
R101-A07	180.41	1.031	158.078	1.0587	148.744	1.8402	6.0972	0.8204	0.6485	1.5797	0.8592	0.521	0.5432	0.7428	0.8647	0.582	1.9123	0.9423	0.5155	1.5132	0.7372	2.3668	0.5986	0.5321	50.9505	1.6518	0.6263	0.6652	0.6208	11.8896	2.389	0.9811	1.164	0.7705	2.0398	5.2159	0.7428	0.7816	0.5931	0.5654	0.5986	1.0532	0.5986	0.5709	1.0476	0.5155	247.12	1.7072	29.4495
R101-A08	101.11	0.7813	35.2776	0.9198	62.6828	1.1077	2.7989	0.9692	0.9198	1.345	1.1967	0.8407	0.9791	0.8703	1.4143	1.0483	1.3352	1.0088	0.8407	1.3253	1.078	3.9066	0.9692	0.9593	16.3086	1.2165	0.8802	1.0286	0.8011	17.3075	2.878	1.4736	2.1066	1.3648	9.0592	2.7099	0.9198	0.9	1.0385	1.0088	1.0879	2.1066	1.0286	1.0187	1.6417	1.0582	282.617	2.3143	32.2216
R101-A09	118.22	1.7087	214.402	1.4041	188.324	2.25	7.4013	1.1842	0.9305	1.9793	0.8374	0.8036	0.7021	0.719	1.0489	0.9643	2.0808	1.1673	0.829	2.1654	1.015	2.6645	0.829	0.8966	68.1939	2.3008	0.8712	0.8628	0.7528	7.3591	1.7763	1.1504	1.5987	0.9051	2.6137	6.4286	0.7782	0.8966	0.7528	0.7444	0.8543	1.2857	0.829	0.8459	1.3449	0.829	153.745	1.3534	15.1241
R101-A10	108.36	1.1259	66.7307	0.969	73.3475	1.052	3.433	1.0151	0.9782	1.2458	1.2551	0.8306	0.9044	0.9598	1.1351	0.8767	1.3197	0.9044	0.7106	1.5688	0.9874	4.4389	1.1443	0.8675	19.3981	1.2366	0.7383	0.7752	0.8859	17.6724	3.0085	1.3566	1.7257	1.4673	8.4809	2.8331	0.9321	0.8306	0.8306	0.8767	0.8767	1.9564	0.7752	0.8121	1.8826	1.0059	278.754	2.1318	30.906
R101-A11	99.04	1.0501	71.2939	1.0097	83.0972	1.0804	3.6753	0.9895	0.8784	2.4434	1.0905	1.1006	1.0299	1.0097	1.1813	1.0905	2.1405	0.9996	0.9794	1.5246	1.4136	5.9571	1.3126	1.5044	37.2776	1.4943	0.8784	0.7876	0.9491	15.3674	2.7665	1.1208	2.706	2.4131	6.674	7.8655	1.0299	1.0804	0.838	0.9087	0.9693	1.9285	0.8582	1.04	2.1708	0.8481	278.512	2.0396	32.1888
R101-A12	128.9	1.4507	195.042	1.4197	133.669	1.8464	5.5004	0.8999	0.8223	1.6292	0.962	0.6594	0.7758	0.7215	0.737	0.7991	1.761	3.3592	0.7913	2.1257	1.1171	2.0714	0.8999	0.6361	32.2729	1.2956	0.6827	0.7292	0.6749	7.8122	1.73	0.9697	1.1637	0.9465	2.4748	2.8316	0.7758	0.6905	0.7758	0.8534	0.7525	1.1947	0.7292	0.7525	1.2645	0.7913	191.892	1.4275	20.349
R101-B01	317.54	1.0455	135.044	0.866	112.975	1.562	5.741	0.6771	0.7558	4.4372	0.696	0.4125	0.4976	0.4503	0.9542	0.5039	2.2737	0.781	0.296	1.9557	0.7905	3.2531	0.4566	0.5102	57.1456	2.047	0.4251	0.6046	0.359	21.4776	3.7822	0.8125	1.1085	0.633	4.0499	7.6872	0.4976	0.548	0.3811	0.4346	0.3999	1.203	0.4188	0.444	1.4833	0.359	278.189	2.6453	36.7072
R101-B02	242.86	0.8153	82.6202	0.7371	95.0719	1.0706	4.55	0.5518	0.6547	1.4823	0.8812	0.5724	0.5929	0.3994	0.8565	0.5147	1.6223	0.6382	0.3582	1.5112	0.9553	4.2288	0.6794	0.6218	39.381	1.3629	0.4365	0.6053	0.4571	28.9222	5.2706	1.5112	1.6718	1.0047	8.4123	5.2459	0.4488	0.5188	0.4941	0.5888	0.7123	2.2894	0.5312	0.5147	1.6223	0.5106	364.579	3.1912	49.4527
R101-B03	105.87	1.0673	64.0683	0.9634	71.3507	1.0012	3.4759	0.8218	1.039	2.6542	1.0957	0.9918	0.8973	0.7273	1.3129	0.8879	1.8607	0.8501	0.8406	2.078	1.039	4.8361	0.9162	1.0012	33.5124	1.4735	0.8123	0.9257	0.7934	20.8083	3.4665	1.5774	2.6353	1.738	8.312	7.6602	0.8406	0.8879	0.8312	0.869	0.9729	2.078	0.9634	0.7745	1.7757	0.8501	357.169	2.7014	42.7878
R101-B04	263.43	1.1958	145.906	1.0098	124.678	1.4539	6.3395	0.615	0.6871	1.6779	0.6719	0.4365	0.4973	0.3872	0.9718	0.5428	1.7158	1.1198	0.391	2.0385	0.968	5.6524	0.6188	0.5277	49.2428	1.7918	0.4328	0.5732	0.4935	18.9994	3.6518	1.1578	2.8736	1.1844	7.5049	6.3622	0.4821	0.539	0.5504	0.5884	0.4745	1.4767	0.4138	0.4593	2.1941	0.4062	272.631	2.2663	35.9869
R101-B05	115.22	1.6317	159.796	1.137	136.483	1.6925	4.2963	0.8245	0.7291	2.6125	0.92	0.9895	0.703	0.7811	0.7898	0.8332	1.8661	0.9027	0.7811	0.9547	0.8419	2.4389	0.8679	0.7985	59.6187	2.0831	0.8679	0.8419	0.8766	13.5398	2.5691	1.1283	1.9615	0.92	1.7793	7.6813	0.8853	0.9547	0.7985	0.7377	0.9027	1.1891	0.8506	0.7638	1.2932	0.9027	251.798	1.9615	29.7182
R101-B06	182.6	1.3144	145.77	0.9201	154.697	1.7087	6.3966	0.8598	0.8489	1.747	0.8653	0.4929	0.4984	0.5805	0.6189	0.5641	2.0537	0.7065	0.4326	1.4294	0.5696	2.1906	0.5148	0.4929	65.3356	2.1632	0.6298	0.4874	0.5093	14.2391	2.6452	0.9803	1.2979	0.7558	2.0154	7.5686	0.5969	0.7393	0.4491	0.5531	0.5586	1.2103	0.4819	0.4765	0.8817	0.4546	262.416	2.0099	32.8814
R101-B07	89.35	1.0408	60.3224	0.9625	76.8299	1.4661	3.7044	0.9849	1.0632	2.1488	1.0632	1.0184	1.287	1.0744	1.0744	1.0856	1.343	0.996	0.9513	1.869	1.4213	3.4358	1.1527	0.9737	27.4081	1.3654	0.9401	1.0632	0.9625	20.1783	3.2679	1.6563	2.0145	1.3766	7.4871	3.3687	0.9065	1.0072	1.0184	0.9513	1.1975	2.4174	0.996	0.9849	1.8242	0.9177	292.715	2.1488	36.7082
R101-B08	137.34	0.9611	63.8504	0.7937	83.3063	1.2306	4.6965	0.8301	0.7573	1.6165	0.9029	0.5679	0.6845	0.6262	0.8155	0.6335	1.3543	0.7063	0.6408	1.5728	0.8519	4.4125	0.8374	0.7864	18.3564	1.0121	0.5971	0.6262	0.5898	17.934	3.5388	1.2961	2.5194	1.7475	4.6164	2.5558	0.6262	0.6044	0.5898	0.8155	0.7864	1.6092	0.7573	0.6553	1.1796	0.6189	297.328	2.5776	36.1375
R101-B09	99.43	1.3376	103.638	1.2169	118.402	1.6795	4.938	1.0661	1.1365	1.8907	1.1666	0.9353	1.0862	0.9454	0.8549	1.1867	1.8203	1.7902	0.8247	1.7298	1.4784	2.6651	0.9856	1.0661	44.7339	1.7801	0.885	1.1163	0.9051	11.9579	2.3232	1.3175	1.0661	0.9353	6.4064	5.4007	0.9655	0.9856	0.8951	0.9454	1.227	2.0215	0.9353	0.875	1.77	0.8549	241.078	1.76	26.1484
R101-B10	112.93	1.0007	82.9399	1.0361	98.4988	1.3372	4.6048	0.7704	0.9564	1.3903	1.346	0.6553	0.9387	0.735	1.1423	0.7616	1.3372	0.8147	0.7616	1.5851	1.0184	4.6491	1.0538	0.8767	27.5138	1.2663	0.735	0.9033	0.9033	17.2504	3.489	1.4789	2.4795	1.222	9.2096	3.5864	0.921	1.0272	0.8501	0.921	0.9918	1.7622	0.8944	0.8944	1.8331	0.8944	262.696	2.1519	30.4184
R101-B11	124.32	1.3674	155.08	1.2628	137.594	1.7937	5.1801	0.925	0.9733	1.8822	0.925	0.7963	0.7561	0.6676	0.8124	0.925	1.6731	1.8018	0.732	1.4318	0.8365	1.1905	0.7963	0.6998	48.8728	1.9063	0.7722	0.8204	0.6274	8.6549	1.9948	0.8365	1.0778	0.7078	3.515	4.609	0.7481	0.7963	0.8365	0.8044	0.7641	1.7133	0.7159	0.8526	1.1502	0.7802	187.946	1.5363	20.2135
R101-B12	133.82	0.7548	60.426	0.6576	62.5483	1.1508	3.1386	0.695	0.8818	9.8717	0.9715	0.8444	0.7697	0.68	1.0238	0.7697	1.1359	0.7921	0.7174	1.6067	1.0537	5.4104	0.8743	1.0761	18.5328	1.0387	0.6427	0.7996	0.7697	22.6878	3.9532	1.3451	2.7276	1.3152	7.032	2.4885	0.7398	0.7174	0.7622	0.7473	0.7697	2.3465	0.7099	0.6576	1.8309	0.7548	317.091	2.4063	40.5854
R101-C01	155.51	1.479	102.335	0.881	70.6452	1.1703	2.4693	0.6752	0.7331	2.3536	0.9453	0.5144	0.6173	0.5337	0.7009	0.643	1.3054	0.5916	0.508	0.8617	0.5144	0.9324	0.5466	0.6109	25.6319	0.9839	0.5659	0.6881	0.5402	23.079	4.7843	1.389	0.9131	0.8424	1.1896	3.511	0.6109	0.6045	0.5595	0.5787	0.6752	1.5305	0.5916	0.6045	0.9646	0.5402	366.241	3.4146	47.6241
R101-C02	85.54	1.204	23.5082	0.9703	17.4061	0.9936	1.508	0.9936	0.9352	1.169	1.0287	0.9819	1.1924	1.0755	1.0404	1.2157	1.0988	1.1105	1.0053	1.5781	2.3146	6.0202	1.4378	1.0638	7.236	1.0872	1.0053	1.3443	1.0755	14.7642	3.0861	1.4729	12.6483	2.1977	2.7822	1.6483	0.9936	0.9118	0.9703	0.9819	1.017	1.3794	0.9936	1.2859	1.7535	1.0755	323.959	2.8172	36.3202
R101-C03	267.95	0.9442	122.087	0.8434	128.495	1.5264	5.4787	0.6382	0.5561	1.4406	0.4964	0.3695	0.3471	0.362	0.5337	0.5225	2.1571	0.7427	0.3247	1.1271	0.6345	2.5154	0.4665	0.4628	68.5841	2.2504	0.5337	0.4404	0.3322	11.4014	2.09	0.5859	1.5488	0.683	1.7205	10.1736	0.5449	0.6195	0.3359	0.3881	0.3583	0.8099	0.306	0.3695	0.9815	0.3545	204.577	1.922	25.1541
R101-C04	313.11	0.4056	36.2812	0.3769	42.1577	0.5014	2.1686	0.3481	0.5813	1.4148	0.9294	0.3226	0.5014	0.3353	0.8879	0.3833	0.7346	0.4312	0.2842	1.2456	0.8815	4.73	0.5749	0.6803	12.2417	0.5685	0.2874	0.5589	0.4982	34.2691	6.4802	1.517	2.3091	0.8112	8.5178	1.9897	0.3066	0.3098	0.3545	0.5206	0.5589	2.1909	0.4375	0.4152	1.1434	0.3481	420.654	3.9475	59.2252
R101-C05	177.29	0.801	62.7406	0.643	83.6617	0.9533	3.8074	0.6261	0.5923	1.8445	1.0886	0.6261	0.7333	0.5584	0.6938	0.5246	1.5455	0.8856	0.4795	1.5342	1.8388	3.5649	0.8235	0.6712	25.7156	1.0943	0.5302	0.6656	0.6543	29.2579	4.7043	1.5512	1.4891	0.7446	11.7043	3.7736	0.6656	0.6769	0.7784	0.7051	0.6656	2.087	0.5866	0.6374	1.7486	0.6205	412.95	3.249	53.9977
R101-C06	149.77	0.8012	47.6804	0.7545	76.7119	0.888	3.3986	0.7011	0.7946	1.3888	0.9415	0.5675	0.661	0.5876	0.8747	0.661	1.5224	0.7011	0.5141	1.4222	0.888	3.6456	0.7211	0.641	27.9899	1.2085	0.5342	0.6543	0.661	25.466	4.1865	1.716	2.2635	0.9815	7.2111	3.7525	0.661	0.8814	0.661	0.7946	0.8146	2.1033	0.8079	0.641	1.3755	0.7345	350.034	2.8578	44.3352
R101-C07	164.26	1.1141	125.816	1.0898	102.614	1.315	5.3331	0.7488	0.7732	1.4977	1.1263	0.6575	0.7488	0.621	1.0776	0.6697	1.5829	0.9436	0.6149	2.0334	0.9863	4.3286	0.9315	0.694	31.8284	1.3759	0.5905	0.7975	0.7001	21.4848	3.9633	1.175	1.5707	1.0228	8.3346	4.2434	0.6027	0.7184	0.6636	0.8158	0.688	1.8386	0.6636	0.7488	1.8873	0.6271	315.301	2.557	39.5602
R101-C08	142.68	1.7101	141.847	1.2195	136.332	1.7451	5.1934	0.813	0.7079	2.1446	0.8621	0.5186	0.6027	0.6168	0.6448	0.834	2.3269	0.834	0.6728	0.7149	0.7499	1.3807	0.6448	0.7289	60.0708	2.411	0.6448	0.5537	0.6238	9.9312	1.9694	0.792	1.0233	0.799	1.2055	7.4642	0.7569	0.778	0.5817	0.6238	0.6518	1.0443	0.5817	0.5677	0.6728	0.5957	227.864	1.7522	25.5394
R101-C09	162.57	0.7258	42.4299	0.5967	64.752	0.7812	2.971	0.6151	0.6459	2.1221	0.9903	0.5967	0.6213	0.5351	1.0149	0.572	1.3717	0.7812	0.4921	1.3594	0.8611	5.8004	0.7258	0.7381	23.6323	1.1441	0.5782	0.6274	0.6459	28.0672	4.644	1.5685	2.1713	1.7653	14.3442	3.6783	0.6397	0.5843	0.5905	0.6274	0.7258	2.0052	0.5351	0.609	1.6362	0.5905	415.731	3.1555	54.3076
R101-C10	148.54	1.3868	157.954	1.4945	122.901	1.6763	5.426	0.8011	0.7809	1.9254	0.8752	0.5722	0.6732	0.5857	0.7675	0.7069	1.4137	0.7675	0.6463	1.6157	0.9425	6.0858	0.8819	0.8213	32.8256	1.205	0.6463	0.7742	0.6395	13.9085	2.4707	0.9694	2.5447	1.6426	4.9615	4.0392	0.7203	0.6799	0.6867	0.7742	0.6328	1.1983	0.6463	0.7675	2.4976	0.6867	236.302	1.8446	28.4363
R101-C11	129.29	1.3149	153.142	1.253	125.63	1.6474	5.2439	0.8431	0.8199	1.632	0.7502	0.6729	0.7038	0.7657	0.9281	0.8199	1.5701	0.7889	0.642	1.7867	0.874	2.2043	0.6729	0.6884	33.8768	1.4463	0.7889	0.6342	0.6497	9.6139	1.9955	0.8972	1.4541	1.1679	2.2353	3.6893	0.6574	0.7425	0.7812	1.0828	0.7966	1.1911	0.758	0.6884	1.369	0.8585	201.791	1.6861	20.9603
R101-C12	214.05	0.6073	44.0919	0.6774	31.0063	0.6307	1.9201	0.5793	0.7008	1.6865	0.9577	0.4999	0.5139	0.5653	0.7008	0.5793	0.7148	0.5045	0.4391	1.0184	1.3828	1.9995	0.5746	0.5886	14.1694	0.9016	0.4905	0.4859	0.6213	20.4249	3.6346	1.252	1.836	0.8409	4.2653	2.0789	0.4905	0.5419	0.5186	0.4859	0.7054	1.3408	0.6587	0.654	0.8503	0.5279	288.111	2.6395	37.8785
R101-D01	258.44	0.9751	108.418	0.8667	106.019	1.4278	5.1346	0.65	0.6849	1.7837	0.5146	0.4643	0.4063	0.3985	0.6771	0.623	2.1784	0.8396	0.3598	1.5671	0.7158	1.6019	0.4411	0.4411	65.4841	2.3177	0.6307	0.4837	0.3985	8.6363	1.718	0.6462	1.1105	0.503	1.6677	11.2829	0.681	0.7893	0.4953	0.4372	0.3869	0.8474	0.3947	0.4721	1.0138	0.4101	146.604	1.331	17.5512
R101-D02	251.42	0.7756	105.395	0.7636	87.4774	1.1137	3.9932	0.533	0.6046	1.8853	0.8432	0.4057	0.5847	0.4296	0.7915	0.4892	1.2727	0.5886	0.3421	1.6585	0.9267	2.6648	0.5409	0.5449	27.9169	1.0659	0.4097	0.5568	0.3898	22.0424	3.8103	1.1654	2.4103	0.7517	6.2007	3.7944	0.525	0.4216	0.4455	0.521	0.4534	1.4438	0.4813	0.4176	1.0779	0.3699	331.514	2.9552	44.6972
R101-D03	260.11	0.792	100.574	0.7804	88.6483	1.0419	4.5904	0.4613	0.6536	1.7031	0.6536	0.4421	0.4421	0.3614	0.8497	0.4806	1.2764	0.4806	0.3998	1.4994	0.6805	5.3171	0.6497	0.5113	28.0539	1.088	0.3768	0.4498	0.4267	22.956	4.3867	1.2956	2.0338	1.3533	6.5319	3.2064	0.4883	0.4383	0.3614	0.4806	0.496	1.5032	0.396	0.3499	1.4456	0.3883	313.975	2.9373	42.0712
R101-D04	194.77	1.2168	110.791	0.9652	63.582	1.1963	3.0035	0.5391	0.6572	5.9043	0.7855	0.7188	0.6469	0.4826	0.7342	0.6469	1.2836	0.6931	0.4929	1.1911	0.8215	3.4091	0.765	0.9652	22.0771	0.8523	0.4056	0.6418	0.5083	26.2717	4.3795	1.0936	2.2385	0.8112	1.8997	7.2392	0.6315	0.6366	0.5134	0.5134	0.5596	1.5249	0.5802	0.5596	1.0166	0.5648	375.511	3.4861	50.7568
R101-D05	189.63	1.1602	152.088	1.1338	129.08	1.793	5.5108	0.7594	0.7699	1.7614	0.8807	0.4588	0.5906	0.4957	1.0336	0.7119	1.8457	0.7647	0.4746	1.5979	0.9281	2.2571	0.7067	0.5695	58.5149	1.9037	0.5906	0.6645	0.501	13.131	2.4364	0.8701	1.3131	0.6486	2.8899	6.9083	0.6223	0.7436	0.5906	0.4799	0.5854	1.0969	0.5432	0.4588	1.002	0.4324	216.008	1.8035	25.6873
R101-D06	141.2	1.9971	219.313	1.4447	190.171	2.2308	7.4219	1.041	0.9207	1.8271	0.7436	0.6799	0.7082	0.8569	1.1685	0.9348	2.0821	0.9986	0.5878	1.7776	1.2464	1.6643	0.7365	0.5949	74.2045	2.422	0.779	0.5878	0.7011	7.8043	1.6997	0.949	1.1331	0.6374	2.0325	8.1301	0.7294	0.9348	0.6799	0.7011	0.6657	1.1968	0.7224	0.6161	1.0906	0.7365	144.089	1.2252	14.4755
R101-D07	169.18	1.2353	155.28	1.123	137.383	1.72	5.6802	0.8689	0.9398	1.6018	0.8452	0.6797	0.6856	0.5852	0.9871	0.6856	1.8146	0.7625	0.5497	1.8323	0.9753	4.7345	0.8984	0.7507	49.2067	1.9387	0.5438	0.662	0.6502	15.6575	2.9908	1.0521	2.5653	0.9043	4.0607	9.9596	0.727	0.8866	0.6029	0.597	0.7743	1.2826	0.532	0.6265	1.3299	0.6916	220.966	1.785	27.0415
R101-D08	130.24	1.075	99.4877	0.9368	99.5338	1.3821	4.3229	0.8676	0.9291	1.6585	0.9214	0.7371	0.7985	0.691	1.0596	0.8216	1.4819	0.9444	0.668	1.5664	1.2132	2.0271	0.7985	0.8293	31.5655	1.3821	0.7371	0.7141	0.691	16.2857	3.1711	1.1594	1.4051	0.7832	5.4669	3.7547	0.7218	0.8062	0.8369	0.883	0.691	2.0194	0.7371	0.7755	1.5894	0.6834	251.794	1.9503	29.3541
R101-D09	143.44	1.1921	151.999	1.1085	132.764	1.6243	5.5841	0.8505	0.7669	1.708	0.7669	0.5717	0.7181	0.5786	0.8087	0.7669	1.5616	0.8296	0.6205	1.9381	0.9621	2.3982	0.7529	0.8366	39.8349	1.4361	0.6274	0.6065	0.6623	10.0668	2.0984	0.9481	1.5686	0.8923	2.0287	4.4199	0.8017	0.6762	0.5926	0.6762	0.7459	1.2688	0.6762	0.7738	1.1712	0.7041	194.099	1.5895	21.3536
R101-D10	164.77	1.141	90.8394	0.8982	52.6053	1.0014	3.2044	0.704	0.9043	2.5732	0.971	0.704	0.8314	0.704	1.0317	0.6979	0.9043	0.789	0.613	1.6265	1.8753	2.0574	0.9225	0.9953	22.5581	1.1531	0.6554	0.7586	0.6554	16.5499	3.083	1.2987	2.2698	0.9164	3.3986	2.8767	0.7222	0.7161	0.6858	0.7768	0.8011	1.4687	0.7647	1.0014	1.2987	0.6736	244.037	2.0452	29.944
R101-D11	146.23	0.9027	62.674	0.7591	59.3574	1.0189	3.1525	0.7249	0.5949	1.5728	1.2172	0.6496	0.7385	0.5471	0.9574	0.7727	1.142	0.7044	0.6633	1.5318	1.101	2.6943	0.7454	0.6633	12.7126	0.6291	0.4924	0.6496	0.6155	24.7003	4.6159	1.5386	1.8122	0.7933	6.2777	1.8395	0.5676	0.6223	0.636	0.5744	0.6702	2.0447	0.6155	0.7249	1.0805	0.6155	347.439	2.8653	45.7489
R101-D12	97.01	0.9793	69.8372	1.1442	71.703	1.2267	3.0306	1.0617	1.0411	1.505	1.1442	1.0514	0.9483	0.9071	1.237	0.9483	1.3813	0.8659	1.0102	1.7111	1.1648	3.8243	1.0102	1.1236	18.503	1.2679	1.0205	0.804	1.103	15.39	2.7007	1.639	2.4636	1.34	5.3087	2.6801	0.9793	0.9999	0.9483	0.8762	0.9793	1.8142	0.9896	1.0308	1.6596	1.0617	234.89	1.8967	26.1619
R101-E01	264.83	0.5966	77.4677	4.1762	84.34	8.6432	4.0554	1.1064	0.5211	1.2196	0.4456	0.3361	0.3814	0.3361	0.5928	0.4493	1.4915	0.7778	0.3059	1.061	0.5626	1.5179	0.4078	0.4758	35.226	1.3556	0.4871	0.4947	0.3436	8.0579	1.3896	0.5362	0.7514	0.3738	1.3254	4.4254	0.4644	0.438	0.4078	0.3625	0.3776	0.691	0.3323	0.404	0.7363	0.3096	136.969	21.5457	17.0598
R101-E02	300.87	1.1666	134.155	0.9572	123.988	1.6054	5.8464	0.678	0.5251	1.5821	0.5384	0.4022	0.3523	0.4321	0.4853	0.4487	2.3432	1.735	0.4088	1.6054	0.6116	0.8974	0.4188	0.4321	56.7094	1.9012	0.4952	0.5551	0.349	9.0206	1.828	0.5684	0.7146	0.3457	2.2236	6.8635	0.4553	0.6382	0.4653	0.4321	0.4088	1.037	0.3789	0.3922	0.7877	0.3191	187.581	1.489	23.3658
R101-E03	226.16	1.4371	180.874	1.0656	151.439	1.835	6.8183	0.6898	0.7163	1.9013	0.6102	0.5085	0.4156	0.5041	0.818	0.6633	2.2241	0.6456	0.4156	1.6935	1.2204	1.95	0.482	0.5306	76.8137	2.6486	0.4554	0.5704	0.3714	14.9409	2.5027	0.6942	1.5741	0.5262	3.1261	10.2539	0.6058	0.6456	0.4775	0.4775	0.535	1.2071	0.5218	0.4554	1.0479	0.4864	218.861	1.7024	26.8441
R101-E04	166.22	0.8182	106.921	0.8423	92.5422	1.1311	4.0971	0.5836	0.7641	1.6304	1.1732	0.5294	0.6437	0.5415	1.5221	0.5535	1.3356	0.6437	0.4933	1.5462	1.3356	4.8852	0.7941	0.728	23.7943	0.9686	0.5595	0.722	0.5354	24.3899	3.9346	1.3958	2.6652	0.8363	7.8873	2.972	0.4933	0.6257	0.6076	0.6197	0.7821	1.6605	0.6377	0.6197	1.5161	0.5655	348.324	2.6231	44.755
R101-E05	219.64	0.5555	66.3415	0.5236	77.478	0.7877	3.8336	0.5327	0.7194	1.3386	0.6147	0.4098	0.4462	0.4052	0.856	0.469	0.9971	0.6374	0.3961	1.6118	1.0745	7.1391	0.7103	0.6511	18.6854	0.7649	0.4143	0.5737	0.4599	26.5393	4.6759	1.2384	4.5985	1.3978	7.2711	2.2947	0.387	0.4189	0.4098	0.5691	0.5828	1.6436	0.5327	0.4963	1.7529	0.5418	358.297	2.9959	47.1142
R101-E06	151.48	1.2015	133.504	1.0232	107.183	1.2543	4.4099	0.68	0.7592	1.5646	1.1289	0.5677	0.5809	0.5677	0.7988	0.6932	1.3995	0.8978	0.5215	1.3797	0.8714	2.4228	0.6668	0.5941	37.5168	1.4193	0.6007	0.7724	0.5611	17.547	2.8849	1.2741	1.6504	0.7856	5.1955	5.0436	0.6404	0.647	0.6007	0.6205	0.5941	1.3731	0.6602	0.5941	1.0232	0.6139	279.195	2.0267	33.952
R101-E07	102.18	1.5072	136.109	1.0962	125.833	1.6932	4.7272	1.2038	1.0179	3.3178	1.1353	0.9493	0.92	0.9102	1.0766	1.0081	1.6834	0.8906	0.8417	1.4191	0.9591	2.0847	1.0472	0.8515	48.8866	1.6247	0.8221	0.8906	0.9004	15.0819	2.7012	1.2821	1.9281	0.9004	2.9753	6.3812	0.9004	1.1353	0.9004	0.8711	0.7536	1.5072	0.7928	0.8711	1.1157	0.7928	274.832	2.2315	32.8455
R101-E08	119.54	1.5643	142.646	1.2464	115.869	1.7986	4.9941	0.8114	1.0122	1.6145	1.2799	0.7111	0.7027	0.6943	1.1461	0.8114	1.6396	0.9035	0.7445	1.5392	1.1293	2.1332	0.8365	0.7863	42.0778	1.5811	0.6441	0.9202	0.9035	11.8035	2.1415	1.0457	1.7651	0.7863	3.8481	5.5462	0.7445	0.8198	0.8365	0.9453	0.8449	1.4221	0.778	0.7947	1.2548	0.9369	194.813	1.4556	20.7629
R101-E09	131.71	1.3666	127.382	1.0098	107.862	1.397	4.3352	0.8276	0.7668	1.3666	0.987	0.82	0.744	0.744	1.0857	0.6909	1.6323	0.8579	0.7668	1.564	0.8959	2.5358	0.8276	0.7289	32.3732	1.3894	0.7744	0.8124	0.6074	10.4545	2.2701	1.0857	1.7007	0.8655	3.0824	5.3449	0.782	0.7213	0.8959	0.8351	0.782	1.4881	0.6909	0.7744	1.1236	0.6681	203.342	1.6627	21.8352
R101-E10	125.83	0.8106	43.5413	0.6834	63.2735	0.9298	2.7576	0.8424	0.8265	2.2013	1.2	0.8185	0.8026	0.7232	1.4463	0.747	1.3828	0.9139	0.8265	1.4066	1.351	4.3947	0.9139	0.755	17.5071	1.1285	0.6516	0.7788	0.6755	24.9852	3.4887	1.4781	2.7576	1.2874	18.3733	3.2424	0.7867	0.6993	0.7709	0.9457	1.0649	2.4715	0.7232	0.8821	1.9947	0.7947	319.34	2.241	39.3691
R101-E11	80.38	1.8164	103.96	1.3063	72.6077	1.6547	2.7869	1.1322	1.1073	2.2021	1.1944	1.1944	1.6671	1.0326	1.0202	1.1197	1.381	1.3685	1.07	1.7418	1.6298	2.339	1.1197	1.0575	18.9109	1.1819	1.0202	1.0824	0.9829	13.2376	2.7371	1.7293	1.1073	1.0575	7.2284	3.4711	1.1322	1.1322	1.2068	1.2317	1.1944	2.6749	1.0948	1.2193	1.9533	1.269	266.17	2.3265	29.486
R101-E12	88.08	1.4532	66.9827	1.0785	42.1877	1.2375	2.2479	0.9764	1.1353	1.3964	1.0331	0.9764	1.0331	1.2261	1.1239	1.1239	1.3737	1.158	1.1012	1.5327	1.2488	2.1571	1.1353	1.1353	11.6822	1.1694	1.1126	1.0672	1.0331	8.844	2.1684	1.4872	1.6916	1.0218	2.5317	2.4409	0.9764	1.0558	1.0218	1.1694	1.1694	1.3737	1.0104	1.0785	1.5099	1.0331	151.404	1.4645	14.8838
R101-F01	223.77	0.724	84.1303	1.5015	76.3233	3.1818	3.8432	0.8714	0.5318	1.363	0.5005	0.4558	0.429	0.3888	0.5899	0.5631	1.5105	0.8089	0.4067	1.3272	0.5899	1.2423	0.5631	0.4424	29.6329	1.3183	0.5094	0.4871	0.4424	8.9511	2.0869	0.6346	0.8804	0.4737	1.2781	4.2365	0.505	0.5407	0.4782	0.4245	0.4826	0.8133	0.4201	0.4067	0.6793	0.3933	140.147	9.7331	17.7949
R101-F02	121.65	0.8631	16.9255	0.6823	21.0027	0.7152	1.8496	0.9124	0.7563	0.9946	0.7727	0.8138	1.0851	0.6412	0.7727	0.748	0.8796	0.896	0.7809	1.1837	3.7156	12.9798	1.2166	0.7891	11.7632	0.8549	0.7316	0.8549	0.7645	14.854	2.4661	0.9124	13.1524	3.5183	6.3707	9.6834	1.2824	1.1591	0.8056	0.8631	1.0358	1.5372	0.7891	1.7263	1.8331	0.7234	287.98	2.4579	34.7552
R101-F03	359.78	0.8283	99.5008	0.7255	96.8631	1.1368	5.1866	0.4781	0.428	1.7233	0.8061	0.3864	0.7143	0.3447	0.517	0.3975	1.4648	1.1896	0.2891	1.9679	1.6371	2.9046	0.5448	0.5309	41.7927	1.487	0.3502	0.567	0.4253	24.6848	5.1254	1.1507	0.6643	0.3558	5.484	5.862	0.3919	0.4308	0.4197	0.4475	0.4725	2.1903	0.4447	0.4308	1.4231	0.3669	346.752	3.6328	47.9938
R101-F04	214.23	1.2137	139.579	0.8822	140.065	1.6804	6.157	0.7049	0.6208	1.8532	0.7935	0.4481	0.7049	0.4761	0.5508	0.5508	1.6618	1.9092	0.5041	1.4751	0.9149	1.7178	0.5228	0.6675	41.5863	1.7645	0.5508	0.6768	0.5321	12.6547	2.3386	0.8542	0.7609	0.5041	2.1659	6.381	0.6582	0.7002	0.5368	0.6162	0.4761	1.2743	0.4061	0.5461	0.9476	0.4668	279.103	2.2406	34.4631
R101-F05	185.44	1.0569	90.363	0.701	103.095	1.3266	4.5621	0.6849	0.728	1.6933	0.9167	0.4853	0.6579	0.4907	0.5177	0.6741	1.4398	1.2403	0.4961	1.5315	0.9221	1.3104	0.755	0.6094	33.6765	1.2025	0.6255	0.5608	0.5986	20.8854	3.6346	1.3751	0.6471	0.4476	3.8287	3.8988	0.5231	0.5824	0.5878	0.5231	0.6417	1.7634	0.5231	0.5285	0.8251	0.5878	371.266	2.761	48.1825
R101-F06	188.29	0.5736	46.4222	0.563	75.7806	0.7382	3.1068	0.5417	0.632	1.8269	1.0834	0.5205	0.6692	0.4142	0.4992	0.4567	1.11	0.7648	0.4408	1.0569	1.0675	2.3421	0.6426	0.632	22.9641	0.8922	0.5045	0.6692	0.5311	26.8782	4.4027	1.4286	0.8232	0.4886	8.5717	3.4361	0.5311	0.5098	0.5789	0.7541	0.632	2.135	0.5789	0.5789	1.3968	0.5523	432.33	3.314	58.3557
R101-F07	185.72	1.2061	125.503	0.9692	130.134	1.4431	5.7399	0.6838	0.6246	1.7607	0.8561	0.5277	0.6946	0.4523	0.6085	0.7054	1.7338	1.7931	0.6192	1.4215	0.9154	1.8846	0.6138	0.6138	53.3286	1.89	0.6354	0.8292	0.5492	15.9544	3.0207	1.1523	0.98	0.5546	3.1338	6.833	0.6785	0.7377	0.5869	0.5708	0.6515	1.61	0.5115	0.5977	1.1523	0.5169	290.211	2.24	34.908
R101-F08	161.56	1.2008	135.196	1.0399	135.87	1.6093	5.3974	0.8727	0.619	1.6403	0.7056	0.6314	0.6561	0.6004	0.5942	0.6932	1.7888	1.8941	0.6871	1.2998	0.7613	1.306	0.6623	0.6561	45.0363	1.5103	0.6128	0.6747	0.5633	7.1615	1.6898	0.7675	0.7737	0.5695	2.1788	4.6609	0.619	0.7304	0.5633	0.619	0.6128	1.0275	0.5137	0.5571	0.8542	0.5818	186.979	1.3989	20.4941
R101-F09	118.29	1.285	105.922	0.9807	135.537	1.657	5.3937	0.9807	0.9638	2.0036	1.0821	0.837	0.9807	0.7524	1.006	0.9807	2.029	1.6401	0.7524	1.6316	1.0821	2.122	0.7524	0.7778	53.8275	1.9445	0.7101	0.7524	0.7778	11.6836	2.2488	1.4034	1.1498	0.7947	5.5544	6.7041	0.9891	0.9722	0.9553	0.9384	0.8961	1.8599	0.7778	0.7778	1.5894	0.7947	234.602	1.8176	27.1885
R101-F10	126.08	1.2611	139.217	1.166	137.845	1.6657	6.0439	0.9359	0.8725	1.6181	1.039	0.8566	1.158	0.8883	1.0153	1.047	1.737	1.7926	0.8487	1.6181	1.7529	4.7193	1.0787	0.9201	46.2337	1.5625	0.7773	0.8328	0.8011	11.7309	2.435	1.1898	1.9988	0.8408	10.0494	5.5125	0.8487	0.7932	1.0708	0.9994	0.817	2.8237	0.9359	0.928	2.4985	0.9597	220.469	1.6974	24.2471
R101-F11	126.81	1.1829	125.156	1.0725	94.977	1.6481	5.5674	1.0252	0.9542	1.8926	0.9542	0.8674	0.9936	0.8753	0.8753	0.8596	1.4352	1.1277	0.757	2.9572	1.5614	2.5156	0.9305	0.9148	20.9053	1.2065	0.7649	0.8832	0.7728	11.9076	2.7048	1.4273	1.3012	0.7886	3.8956	2.7679	0.8832	0.9226	0.9936	0.9305	0.97	2.1213	0.8122	1.104	2.7285	0.9226	221.135	2.0345	25.5422
R101-F12	113.76	0.967	46.7666	0.7472	60.0493	1.2219	2.7251	0.756	0.8351	1.1867	0.9406	0.6857	0.8615	0.7648	0.8087	0.9054	1.2043	1.1076	0.7736	1.2131	1.2043	1.3801	0.9142	0.9494	18.2847	1.0813	0.8263	0.7384	0.7824	8.0699	1.7318	1.178	0.8439	0.8263	2.8834	2.9185	0.8263	0.9758	0.7824	0.7736	0.8087	1.5735	0.7648	0.8351	1.3274	0.7384	181.062	1.5384	20.5703
R101-G01	239.73	0.4839	33.22	3.2286	37.8502	4.067	2.2692	0.5965	0.5965	1.2305	0.7133	0.4255	0.4755	0.4213	0.8551	0.4839	0.8593	0.6424	0.4088	1.3348	0.9135	5.7522	0.6924	0.584	10.1946	0.634	0.4672	0.6507	0.5339	22.7126	4.4966	1.2806	1.5767	1.1262	8.4427	1.852	0.4171	0.4088	0.4171	0.634	0.5256	1.6435	0.4171	0.5131	2.0064	0.4922	270.958	12.3595	37.3955
R101-G02	249.39	1.1789	125.051	0.8661	130.304	1.6561	6.3556	0.6295	0.5814	1.8405	0.798	0.425	0.6456	0.4611	0.5173	0.7097	2.3057	1.4315	0.3529	1.6881	0.802	1.608	0.5814	1.5759	61.0901	2.045	0.5012	0.6055	0.4611	15.3938	2.863	0.8782	0.7739	0.4411	3.6049	10.3133	0.5935	0.7178	0.4451	0.5333	0.5493	1.4075	0.4411	0.4451	1.1187	0.4291	283.445	2.3418	36.8305
R101-G03	252.48	0.8832	133.45	1.006	116.316	1.7269	5.8302	0.6614	0.6298	1.315	0.6258	0.4555	0.408	0.4317	0.6733	0.5783	1.6556	0.6892	0.3723	1.6635	0.6416	2.1071	0.5545	0.5426	42.9306	1.5249	0.4198	0.4991	0.404	14.4647	2.6735	0.7525	1.1209	0.5307	2.8517	6.2144	0.4872	0.5822	0.4594	0.3684	0.4278	0.9031	0.3644	0.3842	0.8516	0.4	235.431	2.2893	30.2008
R101-G04	141.62	1.5111	141.683	1.2851	87.538	1.1792	3.6365	0.812	0.7202	3.46	0.9815	0.6002	0.9744	0.7485	0.7767	0.9533	1.4264	0.7838	0.5931	1.3275	1.0874	2.1254	0.7556	0.6638	33.4278	1.264	0.6991	0.9674	0.6991	21.8545	3.6295	1.4052	0.8191	0.6849	7.1177	5.5219	0.6849	0.7061	0.7344	0.6991	0.7909	2.2172	0.6991	0.7414	1.5111	0.6708	376.787	2.7256	48.5812
R101-G05	111.51	1.1031	71.4208	1.0672	66.7395	1.0582	3.5244	0.8878	0.9237	1.4797	1.0672	0.843	0.7892	0.8699	1.7398	0.9147	1.3183	0.9775	0.8699	1.7129	1.1658	4.4571	0.9237	6.7618	24.9937	1.3362	0.7623	0.7354	0.8609	18.9044	3.5872	1.4887	2.4662	1.1479	7.1026	8.6989	1.0672	0.9775	0.7981	0.9775	0.9237	1.8743	0.9865	0.7802	4.5468	0.9596	283.898	2.1254	33.1814
R101-G06	166.19	1.1974	128.255	0.8785	140.278	1.4441	6.1375	0.7642	0.9086	1.8593	0.7281	0.6438	0.5355	0.6258	0.8725	0.6799	1.9074	0.7401	0.6137	2.0518	1.1192	2.7378	0.6679	0.9146	56.4588	1.769	0.5957	0.7221	0.698	18.0995	3.171	1.1252	1.9917	0.7461	4.9641	7.2747	0.6378	0.6017	0.5415	0.5957	0.6258	1.769	0.6137	0.6559	1.3599	0.6258	273.154	2.0398	33.2086
R101-G07	188.56	0.7902	78.7168	0.647	96.3556	0.9493	4.0517	0.6311	0.5834	1.4531	0.9864	0.5568	0.7637	0.4826	0.5409	0.5356	1.3205	0.8273	0.5462	1.4319	0.9758	2.5244	0.6258	0.6523	31.5652	0.9864	0.5515	0.6099	0.5887	19.6858	3.7494	1.4955	0.8326	0.6099	7.1701	4.4654	0.5568	0.5675	0.6629	0.5887	0.647	2.0471	0.5993	0.594	1.2569	0.5144	349.19	2.6516	43.9537
R101-G08	148.82	1.5589	178.196	1.2633	142.797	1.7336	5.5705	0.8735	0.766	2.0898	0.8265	0.5913	0.6988	0.5443	0.719	0.9475	1.6799	1.942	0.6249	1.2297	0.7727	1.3842	0.8735	0.6182	46.0827	1.5993	0.6585	0.6518	0.5712	8.339	1.9151	0.887	0.7459	0.598	2.2242	5.3555	0.7324	0.7123	0.8131	0.6652	0.6518	1.2969	0.6182	0.6182	0.8668	0.6048	202.911	1.5724	20.5081
R101-G09	162.61	1.0824	88.1269	0.8179	90.8082	1.0147	5.1351	0.6949	1.1808	1.7773	0.8302	0.5289	0.8118	0.7195	1.0393	0.6396	1.4944	0.7441	0.5289	2.2447	1.4883	2.749	0.6519	0.7503	22.8281	1.2115	0.5289	0.7195	0.615	23.6399	4.4955	1.2054	2.6506	0.8056	3.161	2.995	0.6457	0.5965	0.5596	0.6211	0.6273	1.7957	0.6334	0.6703	1.5867	0.5842	322.386	2.792	40.3121
R101-G10	103.84	0.8956	58.3954	0.8763	80.4189	1.3385	3.5342	0.8667	0.9341	1.4348	1.1652	0.9822	0.9919	0.9148	0.9534	0.8667	1.2519	0.8763	0.8185	1.3867	0.9341	3.5919	0.9052	0.9822	22.3701	1.2711	0.7608	0.8667	0.9245	17.95	2.7349	1.6082	2.446	1.3	6.0475	3.5149	0.9341	0.9052	0.7511	0.8378	0.9341	1.6852	0.9919	0.8859	1.3097	0.7993	299.122	1.9934	34.0993
R101-G11	104.34	1.2172	68.343	0.9105	62.2668	1.0638	2.4152	0.9105	0.7667	1.2459	0.8242	0.7284	0.738	0.9871	0.9488	0.9488	1.1788	1.0638	0.7667	1.2747	1.1022	2.1085	0.9296	0.9296	18.8228	1.2938	0.8817	0.8626	0.9967	10.3315	2.1947	1.083	1.8497	0.9296	2.4152	2.8656	1.0542	0.9392	0.9584	0.8626	1.0542	1.313	0.8913	0.8913	1.2747	0.9392	177.638	1.6101	20.893
R101-G12	91.91	1.0988	62.1121	0.903	53.6586	1.4796	2.5785	1.0227	1.2838	1.3708	0.9248	0.8921	0.8595	1.0988	1.3164	1.0227	1.1532	1.088	1.1424	1.5449	1.0336	2.9158	1.0444	1.0444	14.0565	1.0662	1.1641	1.0662	1.1315	8.8669	1.7625	1.262	2.0671	1.4144	3.3945	6.3537	1.0227	1.1315	0.7833	0.9792	0.8269	1.3164	0.8813	1.1315	2.0019	1.0444	160.334	1.4144	16.5806
R101-H01	210.2	0.9705	116.643	1.4367	183.64	3.3111	7.507	0.9039	0.6946	1.9505	0.6993	0.5043	0.5138	0.4186	0.7992	0.5328	2.7021	0.628	0.4234	0.6232	0.7802	1.5081	0.6517	0.5614	64.6274	2.3358	0.5709	0.5376	0.5233	11.8884	1.8648	0.7183	0.9705	0.4282	2.1027	9.3956	0.628	0.6803	0.5043	0.4519	0.4662	1.0276	0.4805	0.5233	1.1322	0.4757	208.078	6.3509	25.399
R101-H02	264.21	1.9227	183.961	1.1998	153.118	1.8583	6.8316	0.6472	0.651	2.2444	0.6056	0.3747	0.4807	0.4012	0.5147	0.7343	2.1573	0.6434	0.3861	1.1392	0.5602	0.9727	0.3898	0.4769	65.4621	2.1952	0.5715	0.5715	0.3671	12.1871	2.0892	0.6926	0.7986	0.4542	1.3625	12.0622	0.5147	0.6851	0.4353	0.4239	0.4088	1.1846	0.3785	0.5072	0.897	0.4315	228.266	1.7978	28.0076
R101-H03	199.45	1.0027	121.472	0.8273	103.598	1.3988	5.2794	0.732	0.8573	2.0205	0.8423	0.7069	0.6317	0.5615	1.9152	0.6418	1.3537	0.7521	0.5214	2.3113	1.2133	3.4695	0.6418	1.1381	36.6001	1.3236	0.4763	0.7621	0.4863	20.3005	3.5447	1.2133	1.7197	0.6969	5.9864	8.7038	0.7119	0.742	0.6468	0.5816	0.7019	1.6746	0.5515	0.5264	1.7648	0.5515	268.118	2.1409	34.5345
R101-H04	123.57	0.9792	87.9404	0.963	117.292	1.4971	4.8716	0.8659	0.9387	1.8127	0.9711	0.7607	0.9873	0.6636	0.8254	0.7364	1.7722	1.1572	0.6474	1.667	1.2462	2.7191	0.9306	0.7526	36.7801	1.748	0.704	0.8416	0.7283	16.0068	2.8728	1.6994	0.9387	0.7931	7.0404	5.6081	0.7931	0.8335	0.8821	0.7445	0.8578	2.0474	0.7121	0.8902	1.748	0.704	309.471	2.1283	35.3315
R101-H05	241.42	0.6503	71.7308	0.5509	68.0608	0.758	3.6659	0.4764	0.671	2.0463	0.8782	0.3852	0.6338	0.4018	1.3379	0.5095	0.99	0.5551	0.3479	1.6735	1.1143	6.8471	0.8326	0.6462	17.7701	0.7912	0.3769	0.4888	0.4391	28.8505	5.0038	1.3172	3.3386	1.2385	11.9296	3.0818	0.4059	0.4474	0.4888	0.5841	0.5965	1.9468	0.4474	0.5758	2.1001	0.5551	354.793	2.9451	46.9106
R101-H06	148.29	1.1666	117.608	1.052	107.013	1.3892	4.6059	0.7485	0.7216	2.367	0.998	0.6002	0.7418	0.553	0.6069	0.6272	1.3959	0.9306	0.6474	1.4094	0.8025	1.9826	0.6878	0.6744	31.6273	1.079	0.5327	0.789	0.6137	15.9418	3.0144	1.1329	0.8497	0.6069	3.1155	6.8515	0.8025	0.6811	0.6609	0.6272	0.735	1.5847	0.7013	0.6406	1.0115	0.6137	324.776	2.2928	40.1579
R101-H07	150.87	1.4582	185.735	1.3124	144.296	1.7167	6.8337	0.8153	0.9147	2.068	0.8285	0.7755	0.6496	0.7556	0.8948	0.8418	1.6438	0.7954	0.6694	2.1873	0.9346	3.3008	0.8683	0.7424	41.5257	1.6902	0.6761	0.8086	0.696	12.0037	2.532	1.0207	1.7962	0.9081	3.1749	5.3755	0.6628	0.7158	0.5899	0.6893	0.6827	1.1931	0.6098	0.5767	1.3588	0.6363	231.49	1.6305	26.7845
R101-H08	130.49	1.0269	65.2004	0.7663	96.2832	1.2415	4.3681	0.8506	0.889	1.6476	1.2032	0.6437	1.0882	0.6897	0.82	0.751	1.4714	0.8123	0.6974	1.3641	1.1342	2.3757	0.7817	0.9656	35.2211	1.4484	0.6667	0.889	0.728	16.9438	3.3106	1.5633	1.1112	0.866	9.0658	7.4259	0.8736	0.8506	0.774	0.843	0.843	2.2377	0.7817	0.8506	1.686	0.7817	300.337	2.4753	36.271
R101-H09	122.44	1.0373	80.62	0.9719	93.9491	1.1679	3.9203	0.9474	0.7759	1.8458	0.9964	0.7514	0.7841	0.7922	0.8331	0.7677	1.3885	0.8494	0.7759	1.1761	0.8902	3.2343	1.1026	0.8821	20.2224	1.1761	0.7432	0.7432	0.8331	18.5317	3.2424	1.3558	1.7641	1.0699	5.0474	5.0638	0.6779	0.8331	0.8739	0.7351	0.7841	1.9847	0.7351	0.6861	1.0863	0.8004	300.436	2.05	35.6097
R101-H10	140.36	0.7267	82.1146	0.8193	68.5001	1.1541	3.2344	0.8763	0.6911	1.5317	1.0615	0.6839	1.147	0.6412	0.6911	0.7338	1.0758	0.9618	0.7481	1.4462	1.3892	4.2746	0.9689	2.5006	19.257	1.09	0.6198	0.8335	0.6911	17.8107	3.5194	1.5531	1.3394	0.976	8.3995	5.2292	0.6982	0.7338	0.919	0.9547	0.8905	2.7856	0.7694	1.0045	1.7597	0.7694	304.92	2.3439	36.3197
R101-H11(WT)	110.3	0.8976	83.4214	1.0064	68.2803	1.5594	3.0736	0.8523	0.8341	1.4235	1.0245	0.8341	0.8523	0.7344	0.9157	0.8341	0.9339	0.7979	0.7979	1.5413	1.0971	4.4335	1.1243	0.8885	12.4303	1.1061	0.7616	0.7163	0.816	9.8463	2.2032	1.1787	1.2149	1.505	4.905	2.7109	1.0517	0.8523	0.8613	0.952	0.8885	1.3963	0.8523	0.9429	1.7408	0.8613	164.395	1.777	17.6435
R101-H12(pET28)	105.74	1.2105	85.8714	1.0592	53.2819	1.2578	2.4872	0.8039	0.8322	1.7969	0.8511	0.8417	0.8511	0.9363	0.8701	0.8228	1.1443	0.9646	1.0592	1.1821	0.889	1.2862	0.9173	1.0403	13.4292	1.324	0.889	0.8606	1.0308	6.516	2.0522	1.0308	0.8984	0.7944	2.2603	4.0571	1.0119	0.9363	0.8984	0.8511	0.8417	1.2105	0.8701	0.889	1.0214	0.8701	169.284	1.5226	17.7322
[truncated: 129 more columns]

## Sheet: R102
Sample Name	Mean Intensity	m/z 115. 18	m/z 117. 19	m/z 117. 74	m/z 118. 15	m/z 118. 70	m/z 119. 15	m/z 119. 66	m/z 120. 15	m/z 122. 14	m/z 123. 11	m/z 124. 13	m/z 127. 12	m/z 129. 12	m/z 130. 12	m/z 131. 21	m/z 132. 97	m/z 133. 20	m/z 134. 20	m/z 135. 14	m/z 136. 12	m/z 137. 11	m/z 138. 13	m/z 139. 12	m/z 140. 13	m/z 141. 14	m/z 141. 78	m/z 144. 12	m/z 145. 12	m/z 146. 12	m/z 147. 12	m/z 148. 14	m/z 152. 12	m/z 153. 11	m/z 155. 14	m/z 156. 11	m/z 157. 13	m/z 158. 12	m/z 161. 18	m/z 162. 14	m/z 163. 14	m/z 164. 14	m/z 165. 15	m/z 166. 15	m/z 169. 15	m/z 170. 16	m/z 172. 11	m/z 172. 77	m/z 173. 11
R102-A01	150.2	1.4914	110.15	1.2717	113.865	1.4914	5.4196	0.9188	0.8389	1.6978	0.9188	0.739	0.6791	0.7057	0.7324	0.7923	1.8576	2.53	0.7524	1.7444	0.9255	1.0786	0.6325	0.6791	46.839	1.9774	0.7657	0.7524	0.6259	10.473	2.5034	0.9454	0.9388	0.6858	2.5034	6.3584	0.8655	0.779	0.6658	0.6059	0.6458	1.3582	0.6725	0.6525	1.052	0.7657	216.285	1.7843	25.327
R102-A02	159.62	2.1613	137.117	1.1715	111.97	1.4158	4.473	0.7956	0.7204	1.704	0.7894	0.5764	0.7079	0.6265	0.7831	0.7017	1.8544	1.8732	0.7204	1.4158	0.9147	1.0901	0.7455	0.7017	48.5768	1.6727	0.6891	0.7455	0.6954	16.0252	2.7628	1.0838	0.7392	0.5388	1.3908	6.2835	0.7831	0.733	0.6703	0.6327	0.6265	1.2655	0.6327	0.6829	0.8207	0.6641	269.76	2.2115	33.7544
R102-A03	150.52	1.4882	99.4479	0.8039	101.986	1.3686	4.6439	0.7707	0.8039	1.4749	0.9567	0.6976	0.6644	0.6245	0.6112	0.7042	2.0197	2.4249	0.6843	1.3154	0.6909	0.9035	0.6511	0.7441	48.0664	1.7539	0.6776	0.6776	0.6444	12.4767	2.3983	1.3088	0.9766	0.6378	2.8368	6.4974	0.6909	0.7308	0.6843	0.6909	0.7109	1.4483	0.7175	0.6511	0.9235	0.671	251.752	2.0396	30.3214
R102-A04	144.57	1.1967	82.0313	0.837	86.7004	1.2797	3.7768	0.7263	0.7401	1.9299	0.8231	0.6779	0.7125	0.6641	0.754	0.754	1.3696	1.508	0.7125	1.5495	0.9477	1.2866	0.7471	0.8508	32.8429	1.3558	0.7747	0.7609	0.7401	14.4431	2.9052	1.1759	0.9822	0.8162	2.8706	3.9636	0.6641	0.8231	0.7332	0.7678	0.7401	1.4941	0.7747	0.7747	0.9546	0.7056	258.317	2.2965	30.6709
R102-A05	132.78	1.0318	65.1982	0.8736	81.4958	1.3858	3.8786	0.7833	0.8134	3.1405	1.2878	0.7682	0.6778	0.6853	1.0393	0.7607	1.6493	0.9565	0.7004	1.1749	1.0393	1.7397	0.7757	0.8134	37.6111	1.5514	0.6778	0.7155	0.7607	17.1562	3.0652	1.4309	1.6569	0.9038	16.5914	6.4468	0.7833	0.8209	0.7381	0.7757	0.8134	2.4552	0.7456	0.7908	1.5063	0.6929	275.531	2.6359	33.4238
R102-A06	125.85	1.7481	115.121	1.2237	113.651	1.8276	4.4259	1.1522	1.0489	1.6925	0.8899	0.739	0.739	0.7708	0.731	1.033	1.5971	2.9003	0.8423	1.2157	0.9058	0.9297	0.6277	0.6992	54.3902	2.0739	0.7708	0.6913	0.6595	7.1593	1.7481	0.8741	0.739	0.7151	1.2237	6.2773	0.8502	1.0409	0.6754	0.8423	0.6992	1.025	0.7469	0.7231	0.7469	0.8502	170.242	1.6845	18.6412
R102-A07	147.3	0.9301	50.9772	0.6314	80.814	1.0455	3.7814	0.8825	0.8893	2.5865	1.4053	0.6246	0.6721	0.577	1.0115	0.6517	1.5275	0.9097	0.7196	1.3306	1.6565	2.573	0.8282	0.8282	36.1029	1.4868	0.9029	0.7603	0.6585	22.1519	3.9782	1.3985	2.0163	1.1202	19.287	6.5648	0.8758	0.8079	0.7468	0.7807	0.835	2.1113	0.7671	0.835	1.6022	0.6314	310.48	2.6476	40.0404
R102-A08	124.1	1.6841	98.3124	1.0717	111.293	1.3779	4.4237	1.0717	0.8864	2.8766	0.9266	0.9669	0.7897	0.7494	0.8461	0.8138	1.9419	1.6518	0.7333	1.4343	1.2489	1.12	0.838	0.7977	57.7256	2.1917	0.7655	0.7977	0.7897	13.4242	2.6188	0.9911	0.9105	0.8058	4.1739	8.7749	1.1361	0.9186	0.838	0.8622	0.7655	1.8291	0.8541	0.9428	1.3295	0.8299	234.045	1.8694	27.4688
R102-A09	141.95	1.6555	94.3152	0.9863	99.6199	1.5428	3.9451	0.7186	0.6622	1.2751	0.944	0.6833	0.6763	0.8242	0.6552	0.7961	1.5569	5.037	0.7608	1.2821	0.8383	0.7397	0.7115	0.6904	43.8395	1.8528	0.8313	0.6622	0.6833	8.6228	1.8669	0.9299	0.6129	0.6622	1.0638	5.2413	0.8242	0.7749	0.7749	0.6552	0.7186	1.1976	0.6552	0.6199	0.8383	0.6693	196.351	1.4512	21.8951
R102-A10	236.31	1.1553	99.9165	0.9775	85.7485	1.1214	3.8721	0.5924	0.5882	1.7689	0.749	0.4697	0.4909	0.4909	0.5713	0.4867	1.5488	1.041	0.4401	1.2103	0.6094	1.096	0.6136	0.4824	36.9053	1.388	0.5628	0.4528	0.5036	19.0599	3.3558	1.1849	0.6898	0.4909	2.4206	5.5098	0.5247	0.4782	0.4697	0.4232	0.4951	1.4727	0.5078	0.4401	0.8548	0.5036	313.769	2.8776	41.226
R102-A11	184.21	1.6177	88.7943	0.874	110.65	1.3354	5.5479	0.912	0.7817	1.5634	0.8088	0.5537	0.6243	0.57	0.6026	0.7926	2.0411	23.0495	1.2377	1.7751	0.76	1.0803	0.6731	0.7111	47.1684	1.7534	0.5809	0.722	0.608	14.771	2.8663	0.9011	0.9283	0.6134	2.4754	6.6119	0.6786	0.6949	0.4994	0.5971	0.684	1.5146	0.5266	0.5917	1.0857	0.5591	270.172	2.2148	34.2594
R102-A12	220.69	1.5044	71.9294	0.7613	74.8566	1.2189	3.8289	0.6933	0.6344	1.3866	0.9108	0.5438	0.5302	0.4577	0.5528	0.4984	1.237	26.8931	1.3095	1.5044	1.2053	1.2823	0.5483	0.5664	31.0301	1.3413	0.4667	0.7159	0.5302	16.8971	3.1583	0.9833	1.1781	0.7386	12.2526	4.8122	0.5755	0.648	0.4441	0.503	0.5438	1.953	0.5528	0.5483	1.0241	0.4622	299.553	2.8411	39.1909
R102-B01	144.36	1.3508	123.016	1.0599	101.299	1.4894	4.7522	0.7343	0.7966	1.6002	0.9283	0.665	0.762	0.6789	0.7966	0.7689	1.4201	2.9788	0.8105	1.8288	0.9352	1.3924	0.7689	0.7759	30.0647	1.3439	0.7551	0.6789	0.6858	11.0353	2.4384	1.0876	0.9906	0.9144	1.8288	4.766	0.8521	0.7966	0.7343	0.7204	0.8313	1.2954	0.7204	0.7066	1.2538	0.672	236.105	2.2445	29.2819
R102-B02	141.17	1.2397	82.7467	0.9776	114.801	1.183	5.6529	0.928	0.7934	2.6139	0.8713	0.8501	0.8076	0.6234	0.6588	0.7367	1.7993	3.3507	0.6659	1.7285	0.8926	2.2102	0.8997	0.7296	38.1254	1.5585	0.7367	0.6375	0.7226	15.8679	2.9611	1.4239	1.5018	0.9776	2.9823	5.7804	0.7651	0.8997	0.758	0.7509	0.7934	1.5868	0.7013	0.8288	1.0909	0.6517	293.102	2.2527	36.4182
R102-B03	159.36	1.2048	83.5637	0.9538	98.4918	1.3052	4.2419	0.7404	0.6651	1.4432	0.9852	0.6902	0.7153	0.7216	0.7279	0.7028	1.506	4.0913	0.7216	1.4621	0.7906	1.3366	0.7028	0.7404	39.8774	1.7193	0.6275	0.6212	0.6024	10.4792	2.1962	1.0228	0.8032	0.6087	2.4974	5.1015	0.7091	0.7718	0.6589	0.6212	0.6087	1.1671	0.7091	0.6149	0.8346	0.6714	218.984	2.0268	26.6372
R102-B04	147.41	0.9429	45.4781	0.7733	62.9801	0.9701	2.9848	0.6716	0.7123	1.5467	1.0515	0.6784	0.8208	0.6648	0.6648	0.7326	1.3771	8.7985	0.7937	1.1057	0.9294	1.4042	0.7937	0.7055	25.2626	1.1736	0.5495	0.6987	0.814	17.8887	3.5954	1.3432	0.9022	0.6309	3.5954	5.4338	0.848	0.814	0.7191	0.7191	0.8208	1.8045	0.7055	0.7937	0.9701	0.6377	306.407	3.1205	39.5288
R102-B05	133.73	1.1291	69.788	0.8151	93.4245	1.1515	4.0827	0.7552	0.8225	1.9367	0.8674	0.7552	0.673	0.8225	1.0917	0.7253	1.5778	1.346	0.7627	1.2712	1.1665	2.4302	0.845	0.7178	37.0812	1.5927	0.7926	0.7627	0.7403	15.9945	3.0209	1.2039	1.5105	0.8225	3.5593	5.4437	0.9422	0.845	0.9123	0.7627	0.7478	1.6899	0.7926	0.8599	1.7273	0.8824	271.428	2.5199	33.5293
R102-B06	176.19	1.9637	113.233	0.9081	136.826	1.7878	5.8175	0.8627	0.647	1.6289	0.647	0.6073	0.5562	0.4994	0.6186	0.7662	2.2816	26.1133	1.3792	1.294	0.6527	1.0159	0.6867	0.6243	63.4244	2.2873	0.7151	0.6754	0.613	8.0025	1.6573	0.7889	0.7265	0.5505	1.6402	7.8777	0.7151	0.7151	0.5335	0.5335	0.5903	1.084	0.5959	0.5335	1.033	0.5732	180.914	1.6743	21.5444
R102-B07	129.36	1.1209	56.873	0.9818	85.9705	1.1209	3.4246	0.8658	0.8272	2.1723	1.2601	0.8272	0.804	0.7421	0.7653	0.7808	1.4379	1.3683	0.7576	1.2291	0.9972	1.6234	0.8967	0.7499	34.7716	1.7239	0.7267	0.7112	0.8272	15.8861	2.6438	1.4533	1.1828	0.9431	7.5759	4.7079	0.7885	0.9122	0.7421	0.8117	0.8272	1.4765	0.8272	0.804	1.1286	0.7344	287.171	2.1104	33.7048
R102-B08	167.22	1.1841	90.0426	0.8851	127.43	1.5788	5.2386	0.8671	0.6997	1.4233	0.7057	0.6399	0.6698	0.5621	0.6638	0.6698	1.9316	4.3117	0.6459	1.4831	0.7176	1.1721	0.5861	0.5562	52.1406	1.9196	0.7415	0.6877	0.6279	7.6306	1.7283	0.8253	0.7475	0.61	1.5668	8.6712	0.7057	0.8432	0.6339	0.5861	0.598	0.8791	0.616	0.5263	0.8193	0.5143	177.926	1.6924	20.153
R102-B09	144.19	0.9154	42.6856	0.7004	66.5494	0.9987	3.1069	0.8391	0.7767	1.7476	0.9779	0.6588	0.749	0.7767	0.7559	0.8183	1.2483	1.3177	0.6727	1.172	1.1304	1.5604	0.6866	0.749	25.2646	1.0957	0.7213	0.7074	0.7421	14.2031	2.9752	1.3107	0.9501	0.9224	4.591	4.3622	0.6935	0.7837	0.6658	0.5756	0.7559	1.5396	0.6727	0.5964	0.9085	0.6172	262.293	2.4204	31.9778
R102-B10	148.64	1.5002	84.3966	1.0024	118.418	1.5339	4.9918	0.8678	0.7871	1.5002	0.8275	0.7737	0.6997	0.666	0.7938	0.8208	1.8097	32.4737	1.7021	1.4195	0.8073	0.8275	0.7198	0.74	52.6764	2.1461	0.7535	0.7266	0.7131	5.3349	1.581	0.814	0.8073	0.7266	1.7559	6.1422	0.814	0.8477	0.6997	0.6795	0.7602	1.1168	0.7535	0.6122	0.9217	0.7468	142.805	1.5339	15.4867
R102-B11	204	1.2794	94.7159	0.7696	111.598	1.3676	6.0882	0.7549	0.7108	1.4412	0.7059	0.4559	0.6176	0.7059	0.8039	0.6078	1.9804	4.152	0.6863	2.152	0.8186	1.2794	0.6127	0.6422	49.0638	1.9118	0.6176	0.6029	0.4951	10.7353	2.2647	0.951	1.1863	0.5588	4.402	6.4559	0.6078	0.6716	0.4951	0.549	0.6618	1.0049	0.5441	0.6176	0.9069	0.5588	205	1.7108	24.3432
R102-B12	184.93	1.7682	127.676	1.1302	119.824	1.5736	4.9262	0.8003	0.6922	1.8872	0.757	0.5678	0.5353	0.5462	0.5516	0.7841	1.8277	1.8926	0.5029	1.0545	0.7138	0.995	0.4705	0.557	53.9666	2.0116	0.6327	0.6597	0.584	12.7833	2.3739	0.8003	0.7949	0.6435	1.4168	9.0737	0.7895	0.8544	0.5516	0.5462	0.5029	0.9679	0.5516	0.5245	0.8382	0.5299	259.835	2.2441	32.6017
R102-C01	158.62	2.0237	136.074	1.1159	113.927	1.6391	5.1885	0.8259	0.7313	1.9796	1.0024	0.6872	0.5611	0.5926	0.7439	0.7439	1.8283	1.8346	0.7754	1.4563	0.7061	1.242	0.7187	0.8322	44.0488	1.8535	0.6935	0.6115	0.6872	11.8397	2.3326	0.9646	1.0339	0.6809	1.9985	7.124	0.7628	0.8385	0.6241	0.6494	0.6746	1.3113	0.6935	0.7376	0.8133	0.643	240.5	2.0111	28.4139
R102-C02	185.2	1.8682	130.652	1.0259	116.511	1.5173	5.2267	0.7667	0.7343	2.3218	0.9125	0.54	0.5939	0.5831	0.7343	0.8531	1.933	1.8844	0.6587	1.5767	0.9719	1.2257	0.6587	0.6533	51.4573	1.9276	0.6371	0.5723	0.5561	15.3292	2.8671	1.1609	1.0205	0.7127	3.0939	7.5053	0.6155	0.7505	0.5184	0.6533	0.7181	1.2851	0.5022	0.5615	0.7289	0.5184	279.182	2.0194	36.1767
R102-C03	130.66	1.5919	87.6518	0.9949	115.816	1.4235	4.546	0.8572	0.949	1.6607	0.8189	0.7271	0.7271	0.7271	0.8648	0.9031	1.7985	2.6174	0.8495	1.1327	0.9107	1.0561	0.7271	0.7577	58.3708	2.3572	0.8954	0.8878	0.972	8.3879	1.8444	0.949	1.0026	0.75	2.1582	7.2169	0.8495	1.0179	0.8342	0.8954	0.8189	1.1786	0.8265	0.7347	0.8648	0.7806	187.794	1.5995	21.3524
R102-C04	112.54	1.5195	82.8064	1.1107	101.236	1.8571	3.9275	1.1374	0.7731	1.4573	0.8708	0.7109	0.853	0.853	0.9863	0.8175	1.8482	3.1011	0.8353	1.3862	1.0307	1.1018	0.9152	0.9152	42.5539	1.8838	0.8619	0.8086	0.6664	5.1982	1.3862	0.8797	0.9241	0.9597	1.5817	5.7846	0.9597	0.9508	0.7464	0.8975	0.933	1.1463	0.8886	0.9063	1.1996	0.7908	116.315	1.4217	12.3868
R102-C05	137.81	1.4875	64.8483	0.878	86.5805	1.3351	4.2884	0.907	0.7256	1.7705	1.0449	0.8054	0.7909	0.6748	0.7329	0.8054	1.6254	5.0068	0.8127	1.4948	0.9868	1.4875	0.907	0.7546	33.8427	1.6471	0.8054	0.8345	0.8199	17.7921	3.0984	1.5601	0.8707	0.6966	5.9936	5.5437	0.8054	0.8707	0.8272	0.7982	0.8345	1.5818	0.7038	0.8562	1.3351	0.7692	322.239	2.6412	40.4023
R102-C06	138.85	1.2603	50.4269	0.7346	69.1947	1.2171	3.3992	0.8138	0.9074	2.3406	1.0371	0.7778	0.7778	0.8066	0.8714	0.7058	1.534	0.9866	0.7058	1.2603	1.5412	1.5628	0.8066	0.7058	33.5603	1.5052	0.6698	0.9002	0.6266	19.2504	3.5505	1.4404	1.3683	0.857	6.1935	6.1863	0.821	0.857	0.7922	0.9146	0.7562	2.355	0.8498	0.7994	1.4836	0.7346	291.204	2.5494	36.4914
R102-C07	148.13	1.4582	83.6276	0.8776	107.647	1.3704	4.0437	0.8641	0.7358	1.5662	0.7358	0.6278	0.6818	0.5873	0.7696	0.7898	1.6674	17.9096	1.4717	1.1341	0.8236	1.1611	0.6751	0.6683	49.1451	1.978	0.9586	0.6481	0.7223	6.0014	1.6674	0.8303	0.8303	0.7156	1.5999	6.4537	0.8573	0.9248	0.8573	0.7561	0.7088	1.0464	0.6211	0.5873	0.8776	0.6346	156.92	1.5662	17.6598
R102-C08	172.4	1.1543	82.2429	0.7598	108.803	1.2877	4.8781	0.8062	0.8178	1.2297	0.7018	0.5104	0.5742	0.6206	0.7134	0.7308	1.4037	2.7204	0.667	1.3805	0.8178	1.1775	0.551	0.7714	40.1615	1.5313	0.6032	0.5916	0.4872	12.9405	2.5057	0.9629	1.1601	0.6322	1.6995	5.1043	0.7482	0.7714	0.58	0.5626	0.5742	1.2993	0.6612	0.6728	0.8352	0.6322	241.955	2.1751	30.7766
R102-C09	129.44	1.3829	69.8569	0.8653	97.0364	1.437	4.0097	0.9116	0.7726	2.1632	0.8189	0.6103	0.6876	0.6567	0.788	0.9966	1.8851	15.8534	1.0739	1.1357	0.8267	1.0198	0.7726	0.7649	45.9223	1.8233	0.8807	0.9194	0.8421	12.0986	2.31	1.3366	1.0662	0.8807	2.4182	6.5438	0.9812	0.958	0.7958	0.6953	0.7726	1.4525	0.7494	0.8421	0.9039	0.8035	238.882	1.9546	29.474
R102-C10	137.19	1.8515	138.191	1.3412	82.9015	1.5235	3.9144	0.8966	0.8674	2.2743	0.8529	0.7581	0.7289	0.9403	1.0497	1.2246	1.3704	0.8893	0.8383	1.5308	1.4287	1.7494	1.0059	0.9913	45.6385	1.9244	0.8383	0.8237	0.7508	11.9909	2.3982	1.2392	1.662	0.9039	2.8574	5.7148	0.9185	0.8893	0.9039	0.8674	0.9913	1.4141	0.831	0.882	1.0059	0.7654	227.238	2.0993	26.6716
R102-C11	163.88	1.5011	88.7747	0.8726	84.6252	1.3852	4.1922	0.7994	0.7689	1.0923	0.7201	0.5675	0.6712	0.6407	0.7262	0.8055	1.3425	2.1053	0.7201	1.6354	0.8787	1.3913	0.6651	0.6834	39.469	1.6171	0.7262	0.6407	0.6224	9.2692	2.0076	0.958	1.2693	0.7445	2.3982	5.4493	0.7933	0.7445	0.6102	0.7262	0.6163	0.9886	0.5492	0.6041	0.8116	0.6102	170.66	1.6476	20.4851
R102-C12	151.64	0.9167	60.2229	0.8639	69.5346	1.0749	3.1523	0.8177	0.765	1.7872	1.0288	0.6265	0.7782	0.9101	0.7914	0.6924	1.4245	1.0815	0.7188	1.3387	0.9299	3.6601	0.7848	0.6331	25.6468	1.0815	0.7254	0.6397	0.765	19.0191	3.3567	1.5168	2.196	1.2332	4.2668	4.0426	0.6265	0.7386	0.6924	0.732	0.7518	1.6289	0.6727	0.6133	1.774	0.6924	325.554	2.961	41.4214
R102-D01	141.49	1.4983	93.0454	1.0955	112.651	1.5973	5.1099	1.0531	1.0107	1.4771	0.8552	0.8128	0.6007	0.841	0.629	0.9259	1.7952	3.8024	0.8835	1.5761	0.8693	1.4347	0.6573	0.6856	43.3882	1.6962	0.7562	0.7138	0.9541	6.3467	1.7245	1.0177	0.9683	0.7492	1.2439	5.6824	0.9965	1.0107	0.8057	0.6644	0.7845	1.0531	0.7986	0.6997	0.9541	0.7562	151.551	1.5619	16.1425
R102-D02	139.81	1.502	120.898	1.1444	100.449	1.5521	5.4788	0.9012	0.937	1.6451	0.8154	0.6938	0.8154	0.8154	0.9513	0.8726	1.6737	2.1457	0.751	2.532	1.0156	1.4734	0.8154	0.7653	29.4609	1.3733	0.7367	0.8297	0.7152	11.2723	2.1743	1.2445	1.4376	0.8583	2.0671	4.2199	0.7081	0.8154	0.7439	0.7939	0.7224	1.4949	0.7009	0.844	1.0729	0.9298	219.322	1.8954	25.0979
R102-D03	167.36	0.7051	19.598	0.5557	57.5632	0.8305	2.7664	0.5796	0.6752	1.1711	0.9082	0.5318	0.5856	0.5676	1.0337	0.5676	1.0217	1.0277	0.5975	1.2368	1.6252	2.2765	0.6991	0.6871	18.0505	1.0576	0.6095	0.6812	0.6513	21.9522	3.585	1.5894	1.5595	0.8246	6.9848	2.9576	0.6274	0.6991	0.6632	0.729	0.7708	2.0375	0.7051	0.8186	1.6073	0.6991	308.495	2.5155	40.0086
R102-D04	162.75	0.9278	46.0346	0.6329	81.0829	1.149	3.9509	0.8418	0.9217	2.3841	1.2473	0.6882	0.7251	0.596	1.1982	0.6636	1.3272	1.1306	0.553	1.2719	1.7881	2.6237	0.8295	0.7681	30.3907	1.2719	0.639	0.8049	0.6759	24.9836	3.8157	1.5484	2.0461	1.1736	21.7761	4.9648	0.6452	0.7558	0.6206	0.7558	0.7496	2.8941	0.7988	0.7496	1.5976	0.5407	320.632	2.8695	41.8133
R102-D05	144.24	1.241	66.8199	0.9221	70.8202	1.0815	3.2724	0.6864	0.7002	1.2549	0.8666	0.7141	0.8666	0.7973	0.8805	0.9359	1.4906	1.4005	0.7141	1.3519	0.929	1.761	0.7002	0.7072	46.0487	1.7263	0.7696	0.6933	0.6378	9.6923	2.0591	0.8528	1.0607	0.8597	1.7402	5.4285	0.8042	0.7626	0.6517	0.7696	0.7557	1.0885	0.6517	0.7141	1.0053	0.6933	199.094	2.0452	24.5219
R102-D06	133.21	1.3888	74.2151	0.8033	88.396	1.2086	4.249	0.9384	0.7958	1.7266	0.9834	0.7432	0.7432	0.7357	0.8783	0.9084	1.7942	1.6065	0.6831	1.2837	1.021	2.117	0.8783	0.8258	46.6416	1.9669	0.9159	0.8408	0.7507	12.6795	2.4248	1.1261	1.4489	0.9459	6.9215	7.5747	0.9609	0.9684	0.6982	0.7432	0.8558	1.4414	0.7807	0.8258	1.3738	0.7958	226.054	2.117	26.0421
R102-D07	125.08	1.623	113.491	1.1833	109.445	1.631	4.4533	0.9834	1.0394	1.7349	0.9514	0.8395	0.7435	0.8315	0.9914	0.8555	1.9428	2.4305	0.7835	1.3272	1.0793	1.0953	0.8635	0.8715	49.8496	1.9988	0.8715	0.7995	0.7116	9.0665	1.8789	1.1993	0.9434	0.7755	2.1107	6.7479	0.9194	1.0394	0.8315	0.6796	0.7915	1.0793	0.7675	0.7675	1.2073	0.8475	184.176	1.5191	20.6594
R102-D08	132.85	1.0237	76.2231	1.0237	99.5732	1.3549	4.3208	0.9786	0.7904	1.5958	0.9861	0.813	0.7829	0.7452	0.8807	0.8807	1.513	1.9044	0.7527	1.227	1.242	2.2357	0.8807	0.7904	38.0137	1.5582	0.7678	0.8054	0.7302	12.5934	2.3711	1.2119	1.3474	0.9334	3.7035	4.7498	0.7678	0.7829	0.7226	0.7753	0.8732	1.6184	0.8506	0.828	1.1216	0.7829	211.175	1.784	25.6611
R102-D09	148.05	1.6211	92.275	0.9524	109.729	1.3172	4.8566	0.8781	0.9389	1.3577	0.8578	0.6687	0.6552	0.77	0.7363	0.8241	1.7292	1.6751	0.6282	1.4725	1.0672	1.3847	0.7498	0.7903	46.5056	1.763	0.7498	0.8713	0.716	11.6247	2.4452	1.0064	1.0267	0.7565	1.7697	6.1197	0.7363	0.8578	0.6755	0.7565	0.7025	1.5603	0.662	0.8781	1.3036	0.716	218.046	1.9588	25.215
R102-D10	108.43	2.0198	128.296	1.2451	117.81	1.7984	4.3623	1.0145	0.9868	2.7852	0.9223	0.9592	0.83	0.7563	1.3096	0.913	1.6877	1.6508	1.0329	1.3649	1.3557	1.863	0.9592	0.8761	46.6295	2.0013	0.8854	1.0053	0.9038	9.0843	1.8169	1.1713	1.2727	1.1159	2.6469	7.0553	1.0514	1.1805	0.9776	0.8761	0.9868	1.3096	0.8946	0.9315	1.5033	0.8946	147.599	1.4848	15.743
R102-D11	175.95	1.222	80.7171	0.79	84.491	1.239	5.5926	0.8809	0.8468	1.4152	0.8753	0.665	0.7332	0.6707	0.7786	0.5513	1.3868	1.4266	0.6081	2.7622	1.1765	1.8187	0.5797	0.6138	22.9443	1.0287	0.574	0.574	0.5172	18.8806	3.5522	1.3186	1.0344	0.7957	3.4215	3.4215	0.5968	0.5172	0.557	0.6422	0.6707	1.9153	0.6309	0.6138	1.5289	0.5627	297.395	2.353	37.477
R102-D12	183.32	2.3128	172.928	1.2382	149.925	1.9692	7.8167	0.96	0.8673	2.0346	0.7037	0.6055	0.6982	0.6764	0.72	0.7855	2.9074	3.262	0.7091	2.4765	1.0419	1.8546	0.6546	0.6819	71.3761	2.591	0.7637	0.5782	0.6491	11.6842	2.4492	0.8455	1.4946	0.6819	2.1165	12.2133	0.971	0.8509	0.6982	0.5455	0.6437	1.1837	0.5291	0.6055	1.1891	0.54	214.848	1.7237	25.643
R102-E01	121.91	1.6898	129.165	1.3043	100.102	1.698	4.2492	1.009	0.9598	1.6734	0.9187	0.8777	0.7383	0.9105	0.8531	1.1074	1.7062	1.739	0.7875	1.4027	1.0254	1.4601	0.8613	0.8613	50.6949	1.9769	0.8449	0.7547	0.7793	6.6199	1.7965	1.0418	1.1402	0.8449	1.3863	7.6124	1.2141	1.0992	0.8777	1.009	0.8613	1.0172	0.9926	0.9598	1.0254	0.8613	125.556	1.5012	13.5022
R102-E02	165.29	1.331	100.449	0.968	88.8023	1.3673	3.7208	0.8107	0.7442	2.0086	0.962	0.6837	0.6837	0.6534	0.6474	0.7744	1.3189	1.0769	0.5808	1.2584	0.8591	1.8937	0.6897	0.7079	29.996	1.2403	0.6413	0.7684	0.6292	14.9315	2.6923	1.089	1.4399	0.7381	3.0916	4.4649	0.6474	0.7079	0.5929	0.6111	0.6595	1.1677	0.6413	0.599	0.9499	0.7381	266.328	2.2264	33.2207
R102-E03	108.7	1.8492	97.879	1.1592	87.7866	1.426	4.0848	0.9292	0.8924	2.024	1.0948	0.9108	1.012	0.9476	0.92	1.058	1.6836	4.5816	1.2144	1.4812	1.0396	1.3064	0.8464	0.9108	40.2777	2.0424	0.9384	1.012	0.9844	11.9324	2.4012	1.426	1.0304	0.874	3.8088	6.8816	0.9476	1.0856	0.874	0.8464	1.0856	1.5364	1.0212	1.0212	1.1132	0.9016	240.479	2.2724	27.6369
R102-E04	157.19	1.3359	62.6552	0.9161	106.709	1.5649	4.0269	0.8906	0.8652	11.9343	1.0878	0.6298	0.7825	0.6298	0.6807	0.7952	1.5713	19.2247	1.2532	1.4441	0.897	1.126	0.7698	0.5853	52.5275	1.9975	0.757	0.7952	0.668	8.2764	1.9975	0.986	0.7698	0.6298	1.5713	6.5906	0.8843	0.8397	0.7443	0.6043	0.6934	1.1514	0.6425	0.7189	0.9542	0.6743	186.044	1.8385	21.1586
R102-E05	149.43	1.847	114.673	1.0306	89.6452	1.3183	3.8077	0.7495	0.8833	2.7638	1.0841	0.7093	0.89	0.716	0.783	0.7629	1.8403	5.3602	0.89	1.1845	0.8566	1.6663	0.8164	0.6826	42.0655	1.7533	0.7763	0.6826	0.7562	14.8026	3.0047	1.2179	0.8766	0.7361	3.0649	6.886	0.8164	0.8833	0.7361	0.7696	0.7495	1.7934	0.7093	0.7227	1.1242	0.6893	265.87	2.4292	32.9645
R102-E06	155.2	1.2565	87.8305	0.9407	119.255	1.424	5.4705	0.8505	0.8699	1.7913	0.8441	0.7861	0.6315	0.7023	0.7539	0.7732	1.4498	3.982	0.7281	1.9652	0.7732	1.424	0.683	0.7797	46.9662	1.7397	0.7281	0.7152	0.8505	8.8855	2.1779	0.9794	1.2178	0.8699	2.0748	7.004	0.9407	0.9021	0.7732	0.7925	0.6894	1.2371	0.7861	0.7217	1.0825	0.7346	198.368	1.6495	22.6551
R102-E07	131.99	1.3789	76.6143	0.9471	103.208	1.6365	4.3641	1.0153	0.9319	2.0533	0.9622	0.7274	0.8865	0.7804	0.8258	0.788	1.6896	14.7061	1.2047	1.3941	0.9243	1.2426	0.7501	0.7577	44.1866	1.7805	0.8486	0.9319	0.8789	6.8568	1.8032	0.9774	0.8183	0.8031	2.7427	5.8112	0.9319	0.8789	0.8031	0.7349	0.788	1.4168	0.7955	0.8562	1.0986	0.8031	169.943	1.5608	17.9716
R102-E08	125.01	1.5599	80.0334	0.9279	99.3759	1.3279	4.6876	0.8719	0.7759	2.4558	0.9759	0.7599	0.9919	0.8159	0.7439	0.8319	1.4639	10.4471	0.8959	1.3919	1.1999	2.1358	0.8159	0.8639	41.6206	1.8798	0.8479	1.1359	0.8559	13.0709	2.9918	1.4639	1.1759	0.8559	4.1037	6.1755	1.0239	1.0079	0.8799	0.8719	0.8559	1.7839	0.8079	0.8879	1.4719	0.8159	247.612	2.1278	31.2774
R102-E09	145.88	1.6794	97.221	0.9597	112.432	1.4943	5.1822	0.9734	0.8089	2.2004	0.9048	0.8157	0.7335	0.6786	0.6923	0.7883	1.9056	19.2961	1.1173	2.0633	1.1447	1.652	0.8089	0.7197	43.987	1.6726	0.7746	0.7609	0.6238	8.5959	2.0084	0.9871	0.9528	0.6649	2.0427	5.5249	0.8568	0.8363	0.7677	0.6923	0.7403	1.4052	0.7677	0.706	1.227	0.8843	202.119	1.6383	23.7586
R102-E10	144.82	1.5054	63.2457	1.0151	81.3652	1.236	3.2938	0.7872	0.7872	1.6158	0.9046	0.6284	0.8148	0.6974	0.6698	0.8701	1.3327	13.1684	1.1601	1.1187	1.1256	1.5468	0.8148	0.7803	28.9609	1.3534	0.8148	0.7734	0.7872	12.3743	2.8795	1.2015	0.8632	0.732	3.3836	4.1915	0.8563	0.8286	0.7941	0.8148	0.8217	1.6297	0.6422	0.7251	1.1877	0.8355	269.859	2.1061	33.2629
R102-E11	176.55	0.8043	29.3805	0.6174	65.932	0.9006	4.5484	0.674	0.8383	2.1921	0.7533	0.6854	0.5778	0.6571	0.6457	0.6231	1.2915	1.3424	0.6571	2.1128	0.81	2.3223	0.7194	0.5947	26.1802	1.1895	0.5098	0.5608	0.5494	20.6009	4.0556	1.3594	1.3877	0.8383	3.2909	4.775	0.793	0.8836	0.6287	0.6457	0.6684	1.5633	0.7194	0.5608	1.7729	0.6514	298.507	3.0077	39.3496
R102-E12	138.49	1.177	78.6185	0.9748	90.7636	1.2347	4.6357	0.8809	0.8665	1.668	0.9026	0.8304	0.8304	0.7654	0.7221	1.0037	1.7835	2.8594	0.9315	2.0073	1.1625	2.4117	0.8593	0.8232	34.6014	1.6535	0.7221	0.8304	0.8376	12.5712	2.5778	1.3358	1.5308	0.9531	2.6572	6.0148	0.8665	1.0037	0.8737	0.9026	0.9098	1.2853	0.7798	0.7437	1.3575	0.7004	238.144	2.2384	29.0559
R102-F01	144.15	1.6649	109.126	1.1238	115.98	1.6371	5.0571	0.8533	0.8394	2.2545	0.8255	0.7284	0.7978	0.7631	0.7076	0.8186	1.6788	19.7774	1.2417	2.0811	0.9018	1.3943	0.77	0.6243	41.8926	1.6579	0.7839	0.8463	0.6382	9.247	2.1297	0.9434	0.77	0.8186	1.8175	5.8063	0.7631	0.9365	0.7145	0.77	0.6729	1.2417	0.7631	0.77	1.207	0.7284	212.134	1.9285	24.3004
R102-F02	135.82	1.8259	102.906	1.0676	113.059	1.7081	4.7046	0.9498	0.8761	1.8185	0.8835	0.7068	0.7731	0.6847	0.8541	0.8246	1.8848	20.1291	1.2295	1.7449	0.8467	1.0676	0.8467	0.832	51.3535	1.9879	0.7878	0.6185	0.7436	6.7956	1.7228	0.8688	0.7952	0.7289	1.2369	6.4643	0.8688	0.9498	0.8614	0.751	0.8172	1.0676	0.6553	0.7878	0.7804	0.6921	165.45	1.6787	17.7657
R102-F03	139.26	1.5582	82.1051	1.1417	127.064	1.5367	4.9619	0.8904	0.8689	2.5061	0.8904	0.7612	0.9335	0.7396	0.7612	0.9838	1.7018	14.2108	1.1274	1.6947	0.9838	1.4433	0.9479	0.7468	56.204	2.0609	0.8976	0.8402	0.7612	7.31	1.7162	1.1776	0.8186	0.7181	2.104	7.5326	0.9479	0.9479	0.7468	0.7755	0.8545	1.4721	0.8114	0.7827	1.034	0.7899	170.034	1.5941	17.873
R102-F04	121.1	1.9488	104.407	1.2386	108.288	1.7341	4.2195	1.2138	0.9083	2.0231	1.1313	0.867	0.9413	0.9413	1.0404	1.1065	1.8662	14.7395	1.4285	1.4285	0.9826	1.1065	0.7927	0.8257	58.8342	2.3203	1.0652	0.7679	0.7927	6.6637	1.6102	1.156	0.9248	0.9083	1.99	8.8437	1.0322	0.9826	0.7927	0.8588	0.8505	1.1891	0.9331	0.8175	1.1478	0.834	144.348	1.5524	16.0359
R102-F05	145.16	1.2883	71.9635	0.9162	87.2917	1.3709	4.2712	0.8198	0.8405	2.2734	0.8749	0.6958	0.9714	0.6545	0.7854	0.7027	1.2676	10.2648	0.9231	1.6396	1.1643	2.1356	0.9025	0.7854	27.6597	1.2814	0.7096	0.8818	0.93	15.0389	3.2654	1.3916	1.0471	0.7647	4.037	4.1541	0.7234	0.7509	0.7509	0.682	0.9094	2.2941	0.7922	0.8267	2.0185	0.7234	276.087	2.3698	34.1561
R102-F06	119.21	1.3926	102.546	1.1912	129.105	1.7365	5.3353	1.1157	1.1241	1.9714	0.9144	0.9479	0.8641	0.7298	0.9312	1.0067	1.7281	2.1476	0.8305	1.5184	1.0906	1.7113	0.8724	0.8557	58.4873	2.2314	1.0738	0.8557	0.8808	6.2581	1.7029	1.0067	1.4177	1.1157	1.6694	7.0299	1.0234	1.1661	0.8976	1.0486	0.9899	1.1073	0.8557	1.0067	1.3003	1.0151	141.537	1.4429	13.8836
R102-F07	122.95	1.7811	92.6116	1.0573	97.0116	1.5616	3.9852	0.9109	0.9597	1.6429	0.8296	0.6506	0.9028	0.9353	0.9434	1.0248	1.9113	16.8599	1.5209	1.4396	0.976	1.1549	0.7238	0.7157	42.0888	1.7811	0.7401	0.9109	0.7808	5.5549	1.5778	0.8621	0.854	0.6913	1.3908	6.4902	0.9597	1.0654	0.9353	0.8621	0.8296	1.0329	0.9272	0.8133	0.9841	0.8296	147.909	1.6754	15.5098
R102-F08	110.07	1.8898	92.2087	1.3992	104.574	1.49	4.7063	1.1539	0.954	2.4077	1.0993	1.1993	1.1539	0.9085	0.8722	1.0448	1.7626	13.3284	1.4446	1.59	1.2356	1.9716	0.854	0.9994	42.9017	1.5809	0.9994	0.8813	0.7904	9.3035	1.9806	1.3356	1.0357	1.0085	3.1163	6.9322	1.0176	0.9812	0.9631	1.0812	0.9721	1.5809	1.0539	0.9085	1.272	0.854	191.141	1.8353	21.0148
R102-F09	132.87	1.4299	82.4463	1.1364	110.112	1.3998	4.3123	0.9332	0.8128	1.874	0.8429	0.7977	0.8128	0.7977	0.73	0.8053	1.6708	21.1929	1.2794	1.5654	1.1063	1.4977	0.7225	0.6924	47.5411	2.1298	0.8429	0.9182	0.7225	5.3961	1.4676	0.9182	0.7526	0.7375	2.0169	5.7874	1.0085	1.0461	0.9106	0.7601	0.8053	1.2644	0.8128	0.7676	1.1289	0.7601	143.045	1.5353	15.4883
R102-F10	131.34	2.3374	109.911	1.0278	124.225	1.7435	5.3296	1.1801	0.8223	2.109	0.9822	0.7309	0.7842	0.6852	0.7538	0.8527	1.7283	19.217	1.104	1.6826	1.2106	1.5989	0.769	0.8527	57.6586	2.2841	0.7918	0.7385	0.7309	7.7203	1.8121	1.1421	0.8756	0.7005	2.4668	9.243	0.8832	0.8908	0.7309	0.8908	0.8451	1.3248	0.67	0.8071	1.0888	0.9593	165.895	1.576	18.0597
R102-F11	140.42	1.4314	70.0408	0.819	100.614	1.4314	4.9281	0.9116	0.8546	2.2219	0.9899	0.7834	0.7549	0.9187	0.7834	1.0184	1.4243	4.8996	0.7976	1.7163	0.9329	1.9513	0.9685	0.762	39.4322	1.8089	0.8119	0.7406	0.7193	12.3987	2.6207	1.1751	1.346	0.8403	2.1365	6.6444	0.8617	0.9614	0.762	0.8119	0.762	1.5596	0.7763	0.8047	1.3531	0.7549	233.054	1.9371	26.7985
R102-F12	154.28	1.6528	121.745	1.2574	105.994	1.5815	5.0881	0.9658	0.7713	2.4565	0.9139	0.6806	0.7389	0.6871	0.7843	0.8232	1.5232	1.3936	0.5833	1.4454	0.8102	2.126	0.8037	0.7195	42.3381	1.9899	0.8361	0.6741	0.6417	13.2809	2.463	1.1473	1.8473	0.9852	3.8695	7.2205	0.7389	0.7778	0.6546	0.6935	0.7648	1.4195	0.6546	0.8621	1.2834	0.7519	249.226	2.0482	29.4979
R102-G01	149.51	1.2909	76.4896	0.8896	81.506	1.2173	4.9696	0.8026	0.8294	2.341	0.7892	0.709	0.9029	0.6755	0.6622	0.6755	1.3778	7.3172	0.7759	2.147	1.1972	1.7056	0.7759	0.9565	22.0118	1.1036	0.6889	0.7424	0.7625	16.7012	3.7255	1.3845	0.9899	0.7357	2.4547	3.993	0.7558	0.7959	0.8093	0.7759	0.7558	1.9397	0.8093	0.7491	1.3979	0.622	300.956	2.7356	38.5057
R102-G02	137.3	1.3037	84.1528	0.9031	111.83	1.6024	5.3606	1.027	1.0124	2.1195	0.8886	0.7502	0.8959	0.8012	0.9978	0.8376	1.8136	13.9405	1.2892	2.1049	1.1289	1.5732	0.9468	0.8959	42.4624	1.9228	0.8886	0.8886	0.7138	7.0212	1.9884	1.1144	0.9541	0.8594	2.1049	6.2128	0.925	0.9687	0.9396	0.8522	0.8594	1.4348	0.9687	0.7575	1.1508	0.7793	162.734	1.6752	17.0724
R102-G03	133.22	2.0793	113.714	1.1335	125.131	1.779	5.0668	0.9608	0.9008	2.0267	1.0209	0.7732	0.8933	0.7356	0.8182	0.9008	1.7865	22.8118	1.5013	1.4637	0.8857	1.1335	0.8032	0.8182	51.5311	1.8165	0.7431	0.8032	0.6906	7.0259	2.0793	0.9083	0.9533	0.7206	1.6139	7.116	0.9458	1.0659	0.7957	0.8632	0.7581	1.5313	0.8407	0.8632	0.9908	0.7281	169.148	1.5538	17.9477
R102-G04	120.1	1.3405	65.7432	0.9409	83.761	1.2239	3.5303	1.0324	0.8659	2.656	1.1074	0.9409	1.1074	0.7993	1.0324	0.9325	1.5736	3.9549	0.9242	1.1906	1.0907	1.532	0.9325	1.0491	32.014	1.7984	0.9908	1.0491	0.8076	16.8355	3.3055	1.5487	1.8151	0.8909	7.1272	6.0698	0.8076	1.1407	0.7993	0.7827	1.0491	2.0566	0.9492	0.8659	1.7235	0.8409	284.513	2.3813	35.6442
R102-G05	129.23	1.1297	71.0117	0.8202	82.8045	1.2149	3.6291	0.9286	0.8202	2.5845	1.0988	0.7351	0.7893	0.6655	0.7738	0.8048	1.3696	1.2613	0.8976	1.153	1.0756	2.2131	0.8125	0.828	31.8574	1.3774	0.8821	0.8048	0.7506	17.5653	3.1958	1.3387	1.4006	0.9595	5.1303	5.5946	0.7428	0.7815	0.7042	0.7738	0.8434	1.8803	0.7815	0.7428	1.447	0.8512	309.273	2.6696	38.5972
R102-G06	122.19	1.5795	82.5289	1.1294	110.265	1.5795	4.7386	0.9739	0.9903	2.3161	0.9166	0.712	1.0394	0.9575	0.8839	0.9821	1.5632	20.0921	1.4077	1.3504	1.0967	1.1621	0.9003	0.8757	36.1085	1.5304	0.8675	0.9657	0.9903	5.7698	1.5877	1.2604	0.8102	0.8593	1.8742	4.6977	0.9821	0.9739	0.7857	0.8839	0.9166	1.3095	0.933	0.9166	1.0885	0.7857	159.206	1.6041	16.2046
R102-G07	143.17	1.2642	65.0263	0.8731	85.6727	1.1664	4.2257	0.8731	0.7264	2.4935	0.8521	0.7194	0.6775	0.6985	0.915	0.7473	1.3899	1.2642	0.6635	1.6484	1.1594	2.2351	0.8381	0.8381	30.8857	1.341	0.8242	0.901	0.6915	14.1158	2.4935	1.1734	1.4388	0.922	2.7379	4.4422	0.8661	0.7962	0.7264	0.915	0.7893	1.5925	0.7334	0.7264	1.6763	0.7753	219.12	2.0954	25.9057
R102-G08	118.05	1.2961	83.6455	1.0759	72.7683	1.7451	3.8798	0.9403	0.9403	6.0231	1.1606	0.8641	0.8471	0.8556	1.0674	0.9996	1.2283	1.186	0.9149	1.313	1.2453	2.2703	0.8556	0.9996	27.9129	1.3723	0.8132	0.9234	0.9911	15.1975	3.0751	1.3978	1.4316	1.1521	5.1251	4.5914	0.9149	0.8895	1.0335	0.9149	0.9488	1.7451	0.8725	1.0081	1.7197	0.9318	254.96	2.2364	29.9883
R102-G09	131.55	1.5204	69.5638	0.9502	94.3152	1.4595	4.3938	0.9578	0.9426	1.8092	0.8894	0.745	0.897	0.7526	0.9046	0.7754	1.4519	15.5228	1.3227	1.4291	1.049	1.2543	0.821	0.9882	33.8203	1.6192	0.859	0.897	0.7146	5.975	1.718	0.9958	0.9806	0.821	1.7104	5.4657	0.9578	1.0034	0.9046	0.8058	0.6918	1.1935	0.7754	0.745	1.1403	0.7678	156.574	1.5812	16.5187
R102-G10	140.47	1.9506	103.141	1.1746	98.9621	1.3953	4.2643	0.8543	0.8045	3.8443	1.0963	0.7048	0.8828	0.8187	0.7404	0.84	1.6231	4.0152	0.719	1.3455	1.3241	1.4309	0.84	0.7902	37.909	1.7157	0.8258	0.7902	0.7617	13.6757	2.9046	1.3028	0.9184	0.8899	8.7351	6.7845	0.84	0.8329	0.7617	0.8187	0.8187	2.1286	0.9184	0.8329	1.4736	0.7617	246.106	2.2852	29.9499
R102-G11	161.91	1.1735	58.3304	0.8153	66.1065	0.9635	3.4526	0.7659	0.6485	2.1556	0.8956	0.6115	0.6856	0.6176	0.6609	0.7906	0.9759	3.922	0.8215	1.1982	1.1241	1.2476	0.6918	0.8215	24.6193	1.3218	0.6794	0.7597	0.6918	12.1058	2.7053	1.1241	0.7597	0.6732	1.8159	3.9282	0.7165	0.6794	0.6918	0.6609	0.7226	1.4021	0.6671	0.7474	1.3403	0.6362	243.785	2.1618	30.4375
R102-G12	124.35	1.8416	171.51	1.3752	83.0087	1.6164	3.9245	0.8524	0.965	2.2196	0.9329	0.9007	1.0294	0.9489	0.8122	1.0133	1.158	1.0937	0.9329	2.0829	1.7773	1.7853	0.9168	1.0454	43.7079	1.9864	0.8283	0.9007	0.7881	6.0958	2.0426	1.142	1.536	0.8283	2.2759	5.2192	1.0213	0.9489	0.8042	0.9731	0.8203	1.3108	0.8846	1.0133	1.351	0.8364	139.592	1.4636	15.2636
R102-H01	143.01	1.7831	115.423	1.1048	80.3003	1.5663	3.7479	0.93	0.874	2.0627	1.2586	0.6783	0.937	0.7901	0.7412	1.1258	1.3565	0.916	0.7412	1.4684	1.6222	1.9998	0.8671	0.909	56.9528	2.3564	0.8671	0.8041	0.8461	9.4257	2.2655	1.3146	1.3845	0.8181	3.3144	6.3351	0.8601	0.881	0.7831	0.6992	0.7762	1.4404	0.6713	0.7831	1.2656	0.6503	189.073	1.9928	22.0679
R102-H02	125.04	1.6955	85.1839	0.9917	109.409	1.4876	4.7427	1.0877	0.8877	2.4393	1.0077	1.0237	0.8558	0.9357	0.8558	0.9037	1.5276	10.0931	1.0477	1.7195	1.0077	1.5756	1.0477	0.9117	37.3654	1.6395	0.9037	0.9517	0.8158	12.2205	2.3833	1.3436	1.3676	0.8638	2.9192	5.3105	0.8558	0.9437	0.9517	0.9037	0.9277	1.6235	0.8078	0.9837	1.3916	0.8638	230.143	2.1114	26.9124
R102-H03	129.57	1.8059	95.0586	0.9879	128.245	1.7519	5.14	0.957	1.1268	2.1301	0.8489	0.7718	0.7409	0.8489	0.8489	0.8721	2.2536	23.3228	1.6361	1.7365	0.9801	1.1345	0.9724	0.7949	54.3787	2.1378	1.0265	0.8721	0.6637	7.108	1.914	1.1499	0.9184	0.8104	1.4972	8.4509	1.0805	1.1268	0.8567	0.7409	0.8412	1.3197	0.7563	0.8104	0.9184	0.903	174.01	1.5435	18.5533
R102-H04	110.22	1.9053	100.844	1.0706	88.3694	1.4698	4.0374	1.0162	1.0615	3.0122	1.1069	0.8347	1.0978	0.9617	1.125	0.8347	1.5061	8.7825	1.125	1.497	1.2339	1.8055	0.9345	1.1976	25.041	1.1976	0.9254	0.9799	0.9436	11.1051	2.5767	1.4244	1.4698	1.116	2.4497	5.0626	1.0524	1.0978	0.9254	0.9254	1.0343	1.9144	1.0887	1.116	1.7148	1.0978	234.66	2.2591	27.1641
R102-H05	120.4	1.6612	72.5185	1.0632	74.3043	1.4452	3.2393	0.9053	0.9469	2.7659	1.1628	0.8887	0.922	0.8887	0.8389	0.7891	1.3954	4.1945	0.9469	1.2625	1.304	1.5449	0.9801	0.8389	25.2748	1.628	1.0382	0.8804	0.7808	11.5036	2.4918	1.304	1.1213	0.897	8.5467	4.2028	1.0216	0.8555	1.0299	0.814	0.8389	1.7442	0.8638	0.897	1.5449	0.9053	221.592	2.1429	25.7316
R102-H06	143.46	2.1399	124.958	0.9549	110.222	1.7008	4.8305	0.8574	0.8155	4.1613	1.0037	0.7249	0.9061	0.7179	0.7179	0.9061	1.5195	6.4755	0.8364	1.6729	0.941	1.4568	0.9271	0.9061	48.911	1.8053	0.8295	0.8016	0.8434	13.5225	2.8578	1.1989	0.8434	0.6761	4.1334	8.2181	0.9201	1.0386	0.7946	0.8434	0.7598	1.4777	0.7249	0.6622	1.1501	0.7528	234.49	2.1678	28.9479
R102-H07	112.63	2.051	141.209	1.4295	88.6461	1.8202	3.809	1.0388	0.9944	4.9189	1.1187	0.8612	0.9412	0.8524	0.9323	0.9944	1.5804	1.0299	0.8257	1.6515	1.1454	1.7935	0.9589	0.8879	34.4765	1.6248	0.9234	1.1809	1.0033	13.9841	3.0188	1.4295	1.5538	1.0122	3.1786	5.9666	1.0566	1.0033	1.0477	0.9944	0.95	1.6781	0.9412	0.9589	1.2608	0.8879	233.673	2.3351	27.0715
R102-H08	123.89	1.243	63.2394	1.0412	84.6447	1.3076	4.1164	0.9686	0.8636	1.8483	1.1865	0.8556	0.7668	0.8636	0.8314	0.904	1.5659	1.6627	0.8071	1.5013	1.0009	1.4448	0.9766	0.8071	28.9763	1.6304	0.8233	0.7426	0.9766	10.0812	2.2923	1.1058	1.1461	0.8798	1.4529	5.8437	1.0331	1.0493	0.7587	0.7668	0.7587	1.4125	0.8394	0.8798	1.0574	0.8233	216.838	1.9048	24.5935
R102-H09	150.13	1.3722	86.7591	0.9658	89.5434	1.3522	3.7168	0.7727	0.9392	3.4038	1.1057	0.8393	0.9725	0.6728	0.7993	0.8126	1.4454	9.1189	0.8726	1.3189	1.1257	2.2314	0.8193	0.8992	34.0908	1.4321	0.7793	0.9459	0.8526	17.6582	3.6769	1.4188	0.9392	0.8126	4.8359	5.4886	0.7594	0.8459	0.7194	0.7061	0.7793	2.1582	0.7793	0.8459	1.4388	0.746	295.98	2.7576	37.801
R102-H10	133.51	1.8275	97.7957	1.131	117.06	1.5055	4.786	0.9812	0.8613	2.4866	0.9287	0.8314	0.8314	0.734	0.8464	1.1085	1.88	2.217	0.8613	1.2733	0.9362	0.9812	0.9138	0.8164	53.5453	2.0522	0.8464	0.8164	0.7415	6.329	1.6478	0.9362	1.0411	0.7041	1.3407	9.0253	0.9362	1.0711	1.0486	0.734	0.719	1.131	0.7415	0.8688	1.0636	0.8314	148.038	1.7302	16.358
R102-H11(WT)	146.33	1.1413	41.3589	0.7381	43.7303	0.8952	2.4124	0.8406	0.7654	2.2005	0.9567	0.6014	1.0798	0.6492	0.6834	0.7381	0.9978	1.9545	0.6766	1.5923	1.7016	2.7609	0.8406	1.7495	19.012	1.2711	0.7039	0.7244	0.6424	19.4699	3.4853	1.4693	1.3053	0.9431	6.007	23.2764	1.401	1.5786	0.9499	0.8747	0.8269	2.5832	0.8884	0.9089	2.3645	0.8337	306.085	2.9113	40.5525
R102-H12(pET28)	159.82	2.9534	202.709	1.921	71.2509	1.6456	3.8795	0.7634	0.6069	8.4097	1.7958	0.7071	0.6883	0.7509	0.7071	0.6883	1.4704	1.1764	0.7071	1.702	2.9909	0.7571	0.6633	0.6507	31.4988	1.4141	0.682	0.6946	0.8885	21.3121	3.9233	1.7645	0.8197	0.8698	1.0262	6.5138	0.7884	0.7884	0.6132	0.6946	0.7071	1.7145	0.632	0.7384	1.0637	0.6132	363.832	2.8595	48.6561
[truncated: 129 more columns]

## Sheet: R99
Sample Name	Mean Intensity	m/z 115.18	m/z 117.19	m/z 117.74	m/z 118.15	m/z 118.70	m/z 119.15	m/z 119.66	m/z 120.15	m/z 122.14	m/z 123.11	m/z 124.13	m/z 127.12	m/z 129.12	m/z 130.12	m/z 131.21	m/z 132.97	m/z 133.20	m/z 134.20	m/z 135.14	m/z 136.12	m/z 137.11	m/z 138.13	m/z 139.12	m/z 140.13	m/z 141.14	m/z 141.78	m/z 144.12	m/z 145.12	m/z 146.12	m/z 147.12	m/z 148.14	m/z 152.12	m/z 153.11	m/z 155.14	m/z 156.11	m/z 157.13	m/z 158.12	m/z 161.18	m/z 162.14	m/z 163.14	m/z 164.14	m/z 165.15	m/z 166.15	m/z 169.15	m/z 170.16	m/z 172.11	m/z 172.77	m/z 173.11
R99-A01	204.17	1.5036	122.162	0.9845	142.616	1.7289	7.6064	0.7886	0.8718	0.7396	0.6661	0.48	0.529	0.5779	0.622	0.6906	2.2432	11.892	0.8375	2.7281	1.2245	1.6751	0.5633	0.5486	51.883	1.871	0.6857	0.8032	0.6024	18.7147	3.4481	1.0286	0.8816	0.6906	3.7371	4.6873	0.5975	0.5192	0.5877	0.529	0.5633	1.582	0.5045	0.5339	2.0032	0.6024	288.841	2.302	37.018
R99-A02	170.26	1.5095	115.558	0.9221	118.941	1.3274	5.9908	0.8281	0.6989	1.7914	0.9456	0.6167	0.5697	0.7165	0.834	0.7342	3.1716	9.7263	0.7048	2.32	0.787	2.8486	0.6108	0.6637	62.5981	2.2847	0.5873	0.7283	0.5521	20.0986	3.5651	1.2393	1.1453	0.7459	4.7339	6.6545	0.6578	0.6343	0.6754	0.6108	0.8105	1.5976	0.5991	0.5756	2.2084	0.5638	302.565	2.5549	37.6129
R99-A03	310.25	2.3948	157.152	1.1603	135.222	1.6664	7.4487	0.7123	0.635	0.9218	0.6027	0.3094	0.3964	0.3836	0.4867	0.6479	2.7075	9.041	0.5898	2.1982	0.7123	2.8944	0.4029	0.3868	57.9687	1.9919	0.3803	0.5802	0.3868	25.0537	4.68	0.9283	1.1926	0.6156	2.527	5.3279	0.5028	0.4416	0.3771	0.3739	0.4577	1.3666	0.3771	0.3578	1.2216	0.4029	353.446	3.3618	49.495
R99-A04	211.64	1.1434	67.6523	0.6757	96.0542	1.2096	4.4462	0.6946	0.6001	0.7087	0.567	0.4914	0.4489	0.5197	0.4489	0.5292	1.753	28.5484	1.3183	1.2521	0.6001	0.8127	0.5953	0.43	45.3409	1.8286	0.5953	0.6001	0.4914	6.7331	1.5309	0.6898	0.5434	0.5056	1.8286	3.6571	0.5386	0.5906	0.4725	0.4819	0.4489	0.8836	0.4441	0.4725	0.8127	0.5103	152.059	1.564	18.8574
R99-A05	267.8	2.233	145.107	1.0605	138.449	2.0463	7.3564	0.8402	0.5825	0.7058	0.5004	0.3809	0.4593	0.5078	0.4145	0.6311	2.7073	32.5211	1.4862	2.121	0.6572	1.7439	0.4892	0.3846	62.7755	2.4011	0.5415	0.478	0.4033	11.0383	2.1248	0.6834	0.7804	0.4892	1.897	4.9067	0.4294	0.463	0.3435	0.4854	0.463	0.9746	0.3473	0.3921	1.0568	0.4593	215.437	1.9268	27.8122
R99-A06	225.62	0.9928	99.5349	0.8067	109.064	1.4671	5.3231	0.6959	0.5673	0.7579	0.4654	0.3369	0.4344	0.4831	0.523	0.5452	2.194	5.0749	0.5363	1.7374	0.6072	1.1214	0.523	0.3945	48.8832	1.7507	0.5629	0.554	0.4742	8.0179	1.7197	0.6116	0.7668	0.5141	1.3563	4.0023	0.5496	0.492	0.4742	0.4521	0.4166	0.8067	0.4166	0.4875	0.7623	0.4388	188.539	1.6444	22.5291
R99-A07	229.69	0.6008	30.6067	0.4746	83.7092	0.6922	4.6585	0.5573	0.5312	0.6618	0.7575	0.4093	0.4833	0.4702	0.6269	0.431	1.3888	6.9268	0.5965	1.785	1.2365	2.9736	0.6008	0.4833	27.0193	1.1189	0.4571	0.5224	0.4484	30.6677	5.3943	1.5935	1.1581	0.6618	8.0544	2.5774	0.492	0.4136	0.5007	0.6095	0.5355	2.5121	0.5137	0.5224	2.3423	0.4702	384.639	3.139	52.4625
R99-A08	197.64	1.5635	102.598	0.9108	121.815	1.2447	5.5455	0.8551	0.6122	0.8298	0.8298	0.5262	0.4908	0.6578	0.6274	0.5363	1.8165	27.4747	1.3054	1.9683	0.9462	1.184	0.5363	0.5971	42.5833	1.5331	0.4857	0.6578	0.5667	19.8091	3.6734	1.2397	0.764	0.592	4.149	3.9416	0.4857	0.4756	0.4756	0.5616	0.6274	1.9126	0.5515	0.5616	1.1789	0.4554	325.457	2.6007	41.4196
R99-A09	153.27	1.5985	94.3103	0.9069	138.226	1.4223	6.7397	0.809	0.7177	0.9134	0.796	0.6394	0.7046	0.5611	0.6394	0.6785	2.4923	9.6104	0.8416	1.9573	0.933	2.7272	0.6198	0.6329	60.2398	2.1726	0.6133	0.6459	0.6394	17.9617	3.086	1.1287	1.331	0.9199	3.0404	5.0303	0.6198	0.7829	0.6263	0.6655	0.6329	1.5332	0.7112	0.6394	1.4484	0.6394	309.446	2.5249	38.8398
R99-A10	139.22	1.6018	139.801	1.2139	162.901	1.8676	8.5764	0.9481	0.9769	0.8763	0.7542	0.7327	0.7398	0.668	0.8476	0.7255	2.1836	3.9219	0.7111	2.9019	1.0056	3.3975	0.747	0.6177	55.8972	1.9897	0.6536	0.6824	0.6824	14.1862	2.9594	1.2426	1.3145	0.9266	4.8556	5.0208	0.8045	0.8188	0.747	0.668	0.8188	1.6736	0.747	0.7901	1.9609	0.9841	239.47	2.004	28.2934
R99-A11	139.32	1.3566	89.6428	0.8829	141.617	1.5432	6.3308	0.8685	1.0264	1.0192	0.9116	0.646	0.725	0.6675	0.7537	0.768	1.9523	7.2065	0.725	1.8231	1.0264	1.9667	0.725	0.567	53.711	1.8519	0.7034	0.5742	0.6747	18.1453	3.3376	1.1484	1.1771	0.7393	6.9911	5.5699	0.6675	0.6675	0.8039	0.6962	0.6962	1.7227	0.7752	0.7608	1.3709	0.725	278.231	2.2466	33.5703
R99-A12	111.01	1.0359	49.5355	0.7206	43.0767	0.9098	2.7114	0.8017	0.8918	0.8468	0.7026	0.7297	0.7927	0.7657	0.9549	0.9188	1.0089	1.063	0.8558	2.5043	0.9098	2.8736	0.9278	0.9639	26.8081	1.3872	0.9098	0.9098	0.8107	14.2238	3.1618	1.5764	2.8466	1.3242	2.252	3.4951	0.9278	0.7657	0.8017	0.8558	0.9909	1.3782	0.9819	0.8378	1.5494	0.9008	277.287	2.2971	32.9066
R99-B01	295.65	0.7577	41.8636	0.4194	92.0006	0.8185	4.83	0.5953	0.4296	0.6765	0.7272	0.4262	0.4769	0.4262	0.4904	0.5716	1.8671	5.8481	0.4871	1.539	0.4972	3.3249	0.5209	0.4363	40.2773	1.4578	0.3687	0.4837	0.389	27.9384	5.4592	1.5018	1.0993	1.6641	4.7421	3.7713	0.4228	0.4871	0.3382	0.46	0.5107	1.725	0.4262	0.3721	1.4307	0.4837	409.991	3.8356	56.5939
99-B02-SI	379.46	0.4954	43.4007	0.4585	53.4728	0.7247	3.1887	0.3716	0.4533	2.1425	1.1068	0.3953	0.3848	0.3637	0.5376	0.3558	1.0304	0.4585	0.3083	1.4731	0.7853	3.3758	0.6114	0.6641	18.6711	0.7774	0.3162	0.5481	0.3689	25.2488	4.8041	1.3914	1.3256	1.6945	9.3948	4.7224	0.4638	0.4085	0.3004	0.4164	0.4638	1.6049	0.4085	0.4243	1.2597	0.3927	360.453	3.6657	50.1786
R99-B03	192.07	0.9476	53.1584	0.5987	111.06	0.9892	5.0139	0.6873	0.6508	0.932	0.8539	0.5154	0.505	0.4686	0.5935	0.5415	2.2648	5.8781	0.6404	1.5828	0.6925	3.5456	0.5883	0.4686	54.0435	1.8743	0.5935	0.7081	0.5883	25.9648	4.6963	1.4318	1.2339	1.4422	5.5605	6.3936	0.5519	0.6716	0.4738	0.5467	0.5779	1.5099	0.453	0.5102	1.8431	0.5467	387.26	3.6758	50.7166
R99-B04	241.92	1.3765	81.0861	0.6366	117.81	1.1492	5.1919	0.6201	0.5787	12.1282	0.8681	0.4175	0.3968	0.4588	0.5332	0.6283	2.2818	28.4975	1.1657	1.4592	0.6738	2.2653	0.4423	0.463	67.3375	2.2156	0.5994	0.6159	0.5622	17.5309	2.8853	0.7937	0.6077	1.0748	3.4558	6.3948	0.5663	0.5746	0.4175	0.4754	0.5002	1.1864	0.4671	0.4051	1.1616	0.4299	291.668	2.3066	38.7077
R99-B05	105.3	0.9877	24.8627	0.7977	14.948	0.9022	1.4245	0.9022	0.9687	0.9592	0.8832	1.0162	0.8452	0.7977	1.0352	0.8832	1.0541	0.9402	0.8167	1.0826	1.605	9.6298	1.1776	0.8357	7.8824	0.9782	0.8642	1.0731	0.9592	10.551	2.4312	1.2821	12.0135	2.4027	5.4607	6.6573	1.1111	1.1586	0.8737	0.9402	0.9402	1.2251	0.8642	1.3485	1.415	0.8737	242.178	2.1368	26.914
R99-B06	110.28	0.934	20.3751	0.7073	29.1254	0.8433	1.4962	0.7526	0.8524	0.9249	0.798	0.7345	0.8433	0.9068	0.9793	0.8252	1.2241	1.2332	0.7798	1.0246	1.0428	2.684	0.9974	0.807	24.8363	1.2332	0.8796	0.798	0.9884	13.6468	2.6659	1.3874	3.4276	1.5415	2.004	3.4729	0.8161	0.8614	0.7798	0.7798	0.943	1.1788	0.7435	0.8796	1.2785	0.943	310.223	2.3485	35.645
R99-B07	160.7	0.6658	31.3932	0.56	53.2782	0.7778	2.8002	0.5787	0.7529	0.8027	0.8027	0.56	0.5227	0.5414	0.6783	0.6472	1.1387	2.2713	0.5414	1.6863	0.6472	2.9869	0.5974	0.5663	27.5041	1.3068	0.616	0.7094	0.7094	20.236	3.6029	1.2383	1.705	1.8357	4.8785	2.9744	0.6285	0.5725	0.5849	0.5974	0.7218	1.5059	0.672	0.6347	1.2072	0.5476	394.03	3.0989	50.2229
R99-B08	274.59	0.5099	40.4937	0.4006	79.6617	0.7284	4.8291	0.4552	0.5171	1.2492	0.9833	0.4407	0.4261	0.437	0.6264	0.4807	1.6352	5.1277	0.5317	2.0176	0.5499	7.2728	0.7357	0.4225	33.9784	1.1909	0.3715	0.5062	0.4516	31.7787	5.7978	1.413	2.7277	4.1226	15.2047	4.25	0.4079	0.4261	0.3496	0.6446	0.5572	2.207	0.4953	0.5281	2.0504	0.4734	428.543	3.966	59.322
R99-B09	177.81	1.4285	133.695	1.0292	160.038	1.766	6.4002	0.7817	0.6299	0.9561	0.7986	0.5849	0.5961	0.4949	0.5737	0.658	2.3115	18.6212	1.1023	1.3329	0.6524	1.6422	0.5568	0.5737	69.7383	2.3115	0.6355	0.5512	0.568	9.7015	1.9965	0.8155	0.8661	0.6805	2.7502	5.9334	0.6411	0.6861	0.5005	0.5455	0.5399	0.9842	0.5737	0.5512	0.8549	0.5905	209.828	1.586	24.1159
R99-B10	157.45	3.1058	135.78	1.0099	113.728	1.4037	4.0776	0.813	0.6161	0.7177	0.705	0.5843	0.6034	0.6351	0.5335	1.1623	1.645	39.8232	1.8737	1.0607	0.705	1.8991	0.6669	0.6478	32.7414	1.3973	0.6097	0.5907	0.7685	10.2956	2.0197	1.1051	1.067	1.1051	1.7085	2.8708	0.5526	0.6415	0.5272	0.5907	0.6542	1.0353	0.6034	0.6796	0.94	0.6732	239.905	1.9689	28.0223
R99-B11	146.56	3.1251	155.504	1.1054	163.767	1.8218	7.0758	0.9757	0.7437	1.0508	0.8666	0.655	0.6005	0.6414	0.6687	1.16	2.4086	22.4556	1.3169	1.2282	0.6755	1.4875	0.7779	0.58	77.4857	2.975	0.771	0.6482	0.655	9.5458	1.9583	0.9484	1.1668	1.0986	3.7528	7.1304	0.7642	0.8256	0.5868	0.6209	0.6277	1.003	0.6482	0.7233	0.8734	0.6823	211.673	1.7263	24.8642
R99-B12	167.06	0.9219	48.0799	0.8141	97.8658	1.0416	5.2976	0.7064	0.7243	0.7842	0.9817	0.6106	0.6405	0.6884	0.7602	0.6824	1.281	11.1819	0.8261	1.9095	0.6166	3.9328	0.7423	0.5986	24.6266	1.1673	0.5806	0.5268	0.6166	21.0828	3.6575	1.3768	1.4067	2.0412	5.7526	2.4124	0.5268	0.5627	0.5926	0.6824	0.6764	1.7539	0.6704	0.7123	1.6701	0.5387	350.153	2.8254	44.7576
R99-C01	229.65	1.0625	82.1745	0.7141	101.221	1.1235	5.8873	0.7054	0.762	0.7969	0.6575	0.4355	0.4746	0.4834	0.5922	0.4877	2.3253	8.8441	0.6488	2.678	0.7446	5.478	0.5835	0.5313	45.4788	1.5459	0.5008	0.5704	0.4267	16.7563	3.4357	0.9798	2.321	2.0205	4.3241	4.3763	0.479	0.5051	0.3701	0.5835	0.54	1.2802	0.4485	0.5661	1.977	0.5356	291.149	2.6519	38.8033
R99-C02	328.08	2.5542	140.22	0.8992	160.337	2.1306	7.7236	0.7224	0.5852	0.9449	0.5944	0.3383	0.3505	0.3109	0.4572	0.506	3.7247	30.0076	1.2741	1.1339	0.4755	2.1702	0.4542	0.3719	84.3656	3.3132	0.5761	0.4602	0.32	13.652	2.35	0.7285	1.0942	0.5273	3.6302	9.0739	0.4816	0.506	0.3048	0.3719	0.3444	0.7955	0.3231	0.3627	0.8108	0.378	237.488	1.9721	31.8608
R99-C03	196.54	0.9311	50.9409	0.6767	62.2413	1.0787	3.2156	0.6716	0.5342	0.5749	0.4935	0.5291	0.4579	0.4935	0.5393	0.5241	1.2466	17.3856	0.9107	1.1855	0.5088	1.5874	0.5546	0.9413	22.2904	1.1041	0.6106	0.5139	0.5088	6.4414	1.4297	0.6971	0.7123	0.8344	1.3941	5.9173	0.5902	0.6207	0.4732	0.4986	0.4986	0.8955	0.4427	0.4884	0.7734	0.5088	147.368	1.852	19.665
R99-C04	182.25	0.8121	45.0912	0.5322	85.2716	0.8998	3.6159	0.7188	0.5267	1.2565	0.9437	0.5267	0.6036	0.5048	0.6804	0.5213	1.5747	5.432	0.62	1.2291	0.7188	3.7036	0.6749	0.5158	35.3958	1.4101	0.5048	0.6913	0.6036	29.1408	5.1961	1.4101	1.6241	1.3717	5.3058	3.325	0.5158	0.62	0.4499	0.5816	0.5706	1.8491	0.5213	0.5761	1.1413	0.5981	448.936	3.5665	59.4832
R99-C05	275.35	0.6029	43.174	0.5157	84.6447	0.799	4.5324	0.5847	0.523	0.8535	0.8535	0.5557	0.4903	0.3922	0.621	0.5302	1.5144	5.0699	0.4649	1.7214	0.5084	6.9511	0.7953	0.5593	30.0961	1.0459	0.3777	0.5484	0.4394	27.4559	5.0917	1.7251	3.2686	2.6838	10.8988	2.8327	0.3886	0.4213	0.3014	0.5193	0.4394	1.8594	0.4903	0.4758	1.6379	0.4576	393.854	3.7443	52.562
R99-C06	167.14	0.7897	65.3326	0.688	104.412	1.1068	4.7085	0.7658	0.7239	0.9932	0.9632	0.5624	0.7419	0.5624	0.5983	0.7	1.8068	2.6803	0.5684	1.735	0.8017	5.7794	0.9214	0.6162	34.2218	1.2863	0.5684	0.5923	0.6581	23.2194	3.6256	1.4598	2.1897	2.094	8.1426	3.153	0.5744	0.5205	0.5504	0.5923	0.7	1.7829	0.6521	0.5744	1.9624	0.688	377.23	2.776	48.3473
R99-C07	233.19	1.7968	94.4164	0.759	82.8593	0.9992	3.1005	0.4932	0.4889	104.631	3.555	0.6218	0.5489	0.4288	0.4288	0.5489	2.9375	7.3674	0.6561	0.639	0.4674	3.0233	0.5446	0.5575	46.5585	1.4666	0.4974	2.0069	0.5189	17.9338	2.989	0.9263	1.6253	1.3122	2.0584	2.7874	0.4803	0.4674	0.3988	0.5789	0.506	1.4066	0.4803	0.5318	1.0721	0.4503	304.588	2.573	40.7907
R99-C08	188.68	1.6695	80.9129	0.7314	115.924	1.2614	4.0067	0.7102	0.5936	1.3462	1.2031	0.5459	0.5247	0.5247	0.6307	0.5618	1.9238	12.248	0.9328	0.7526	0.7367	2.9785	0.742	0.6625	48.3665	1.8073	0.6201	0.5459	0.5088	24.1832	3.8689	1.4151	3.1693	1.5158	15.8996	5.3317	0.5353	0.5671	0.4664	0.5194	0.636	1.802	0.5353	0.5141	1.1183	0.4823	374.403	2.6552	49.2039
R99-C09	138.04	1.6951	103.546	0.9272	126.293	1.4633	4.8535	0.8186	0.7606	1.6372	1.1373	0.623	0.6665	0.6013	0.565	0.6954	1.9052	24.2748	1.3401	1.246	0.7824	4.2812	0.7027	0.7316	57.6843	1.869	0.6737	0.6592	0.565	18.7186	3.383	1.159	1.869	1.6734	5.8749	5.0274	0.7172	0.7027	0.6882	0.6375	0.6302	1.8762	0.6592	0.7606	1.7096	0.6882	316.224	2.5209	39.8422
R99-C10	181.77	0.9958	57.4137	0.5446	108.875	1.0233	4.3957	0.6712	0.5612	1.1773	1.4579	0.5116	0.5612	0.5336	0.7812	0.6657	1.4579	13.6602	0.8142	1.0563	0.7097	6.6183	0.9353	0.6767	37.4708	1.3424	0.5171	0.6877	0.5336	22.7322	3.576	1.3754	3.8235	5.8591	26.7043	4.2087	0.5832	0.5612	0.5226	0.7702	0.6712	2.0961	0.5446	0.7317	1.942	0.6712	376.336	2.8003	49.2055
R99-C11	191.18	1.088	73.7424	0.7218	114.898	1.156	4.5036	0.7323	0.6434	0.9677	0.8055	0.4865	0.5021	0.5335	0.4865	0.544	1.8935	14.6773	0.9781	1.1455	0.6015	2.584	0.5911	0.4812	54.2842	1.7941	0.6486	0.6172	0.476	12.4334	2.2021	1.088	1.6267	1.4594	7.1347	4.399	0.5335	0.6277	0.4341	0.5858	0.476	1.1246	0.5649	0.5126	1.1769	0.4917	255.174	1.9458	30.8507
R99-C12	130.06	1.4378	93.5106	0.8765	113.632	1.4532	5.9665	0.8842	0.7612	1.0995	0.7766	0.6151	0.7535	0.6766	0.7612	0.8919	1.5147	13.0401	1.2302	2.5373	0.815	3.6983	0.7919	0.6459	28.1254	1.1918	0.6459	0.6074	0.6459	16.6846	3.3215	1.2071	2.0452	1.2917	3.952	3.237	0.8073	0.9303	0.8611	0.8458	0.9611	1.7761	0.8611	0.7458	1.5993	0.8688	297.716	2.5527	37.0444
R99-D01	297.47	1.106	57.0303	0.4975	89.9844	0.8841	4.9046	0.4673	0.474	0.9446	0.8639	0.3765	0.4471	0.3967	0.4538	0.3799	1.8489	9.5403	0.4706	1.5699	0.4471	2.8439	0.5244	0.3328	34.5442	1.1867	0.4168	0.5446	0.4774	29.4009	5.3181	1.3245	1.3682	1.9531	5.7518	3.9768	0.3866	0.4101	0.3025	0.5244	0.4505	1.6203	0.4303	0.3832	1.2606	0.4874	422.108	4.155	58.0757
R99-D02	211.97	1.6937	148.315	1.1889	121.816	2.0239	5.9443	0.8445	0.6416	3.2741	0.769	0.5095	0.5991	0.5378	0.6227	0.8681	2.1701	0.953	0.5001	1.5804	0.7218	1.604	0.6416	0.6133	62.5049	2.4674	0.7171	0.6086	0.5897	7.888	1.7927	0.9058	1.019	0.835	1.8824	13.2945	0.8728	1.0898	0.5142	0.5142	0.5614	0.9624	0.585	0.5425	0.9152	0.4954	167.564	1.7031	19.7295
R99-D03	292.51	1.2478	97.2698	0.7214	137.249	1.5487	6.4033	0.7214	0.4855	0.8068	0.5299	0.4137	0.3419	0.3761	0.4547	0.5402	3.1726	7.3879	0.5573	1.3948	0.5812	1.7777	0.4923	0.359	90.1965	3.2786	0.7521	0.6154	0.3795	13.2784	2.3316	0.7043	1.0017	0.4205	2.6564	9.1554	0.5436	0.7145	0.3897	0.4068	0.4308	0.8957	0.3966	0.4	1.053	0.359	226.806	1.9453	29.7874
R99-D04	212.22	1.0084	66.1718	0.5702	105.249	1.0319	5.532	0.5984	0.7398	1.8707	0.622	0.4901	0.4476	0.5796	0.5042	0.5513	2.045	8.0906	0.7209	2.3749	0.933	2.2806	0.556	0.5466	47.6486	1.6916	0.4759	0.5937	0.4052	23.1882	4.0665	1.1827	1.1073	0.7681	4.1419	5.8053	0.5607	0.5984	0.4241	0.4995	0.5278	1.5597	0.688	0.4806	1.3477	0.4995	389.157	3.0958	49.9575
R99-D05	125.76	0.986	40.3063	0.7633	31.663	0.8429	1.9879	0.7633	0.7395	3.777	0.8429	0.6918	0.8508	0.8667	0.9701	0.9383	0.9462	1.153	0.6918	1.3518	0.9542	3.284	0.7952	0.7077	37.6585	1.3915	0.7077	0.8588	0.6759	12.1658	2.3934	0.9542	2.8307	1.3279	2.9659	5.9159	0.7952	1.0019	0.7315	0.819	0.7236	1.0814	0.7793	0.819	1.2563	0.7713	251.73	2.0117	29.3571
R99-D06	250.33	1.7417	89.8296	0.723	101.254	1.2943	3.9788	0.5992	0.5752	35.8807	1.3542	0.4634	0.5872	0.3995	0.4554	0.4634	2.0014	20.8206	1.0906	0.8709	0.5752	2.8482	0.5393	0.4953	42.464	1.506	0.4634	0.795	0.4274	14.1733	2.6445	0.9547	1.7257	1.1305	2.0373	3.6552	0.5513	0.4394	0.3915	0.4474	0.5313	1.2623	0.4155	0.5513	1.1984	0.5393	261.439	2.1651	33.7675
R99-D07	151.38	1.275	70.823	0.7201	115.394	1.1362	4.3137	0.7663	0.5945	47.8605	1.7902	0.6738	0.6804	0.7134	0.6936	0.7201	2.2923	20.0558	1.2221	0.9711	0.8191	3.3823	0.8059	0.8125	62.4466	2.2857	0.6936	1.1891	0.8258	16.7925	3.2303	1.3344	2.0214	1.9157	5.9124	7.3459	0.7795	0.8191	0.6672	0.687	0.7531	1.7572	0.7134	0.7068	1.592	0.6936	290.334	2.5763	35.5139
R99-D08	158.26	1.2637	59.6047	0.6445	101.567	1.0236	4.7454	0.6508	0.6382	24.82	1.4849	0.6192	0.8025	0.6129	0.9036	0.6824	2.1231	5.0424	0.6635	1.9841	1.2637	4.202	0.8214	0.594	53.4439	1.8577	0.6887	0.8846	0.7014	25.0664	4.0819	1.3333	3.9745	1.2006	14.2108	6.4578	0.6508	0.6635	0.556	0.6445	0.7709	1.6302	0.5876	0.6761	1.5734	0.7267	377.393	3.1973	49.6969
R99-D09	199.6	1.6232	106.552	0.8918	115.164	1.3827	4.9548	0.7264	0.6262	1.0671	0.6613	0.521	0.5611	0.486	0.5611	0.9419	1.7735	19.7543	0.9469	1.6583	0.6763	4.3937	0.6563	0.4459	40.9614	1.3527	0.521	0.5661	0.486	16.6331	2.8958	1.0521	2.4799	1.1673	3.031	3.5921	0.4459	0.5912	0.521	0.5611	0.6313	1.2876	0.4709	0.5411	1.7184	0.6763	280.267	2.2495	35.8813
R99-D10	141.44	1.0959	64.1839	0.6858	116.066	1.2797	4.9563	0.8484	0.7707	1.5625	0.9403	0.6646	0.6505	0.6787	0.6717	0.6858	2.5524	2.2483	0.6151	1.3858	0.9403	4.0654	0.7707	0.7	64.6859	2.1494	0.7282	0.6575	0.7282	17.4494	3.1392	1.5272	1.6403	2.814	8.2298	7.4308	0.8272	0.8626	0.6717	0.7707	0.7989	1.8241	0.7424	0.7212	1.5484	0.7494	306.157	2.5382	37.4795
R99-D11	172.57	1.4429	98.4064	0.904	127.554	1.5066	5.3659	0.7707	0.6896	2.0282	0.7939	0.5273	0.5157	0.5737	0.5679	0.6722	1.9239	28.8694	1.4313	1.4371	0.7185	2.0455	0.6142	0.5505	62.8614	2.2252	0.7359	0.6432	0.6954	7.5274	1.7152	0.7707	1.3154	0.9387	2.0282	4.1838	0.6027	0.6432	0.5505	0.62	0.6084	0.9561	0.6432	0.5331	1.1474	0.6084	184.638	1.5182	20.3743
R99-D12	133.8	1.3602	80.1345	0.9342	92.5933	1.2108	4.3199	0.8221	0.7773	4.3124	0.9492	0.6129	0.725	0.7698	0.7922	0.7848	2.2347	2.9522	0.8146	1.8087	0.9865	5.1794	0.8371	0.8146	42.0553	1.7564	0.7848	0.6353	0.5456	18.3632	3.5725	1.3901	2.3019	2.7354	4.3124	6.7489	1.0538	0.7773	0.7922	0.7474	0.8445	1.7265	0.7474	0.8072	2.1226	0.6876	297.227	2.3767	38.6248
R99-E01	302.16	0.7777	56.2582	0.4369	80.2521	0.8373	4.4744	0.4369	0.4865	0.9167	0.7645	0.3938	0.4964	0.3806	0.642	0.417	1.5786	10.2197	0.6056	1.7441	0.8307	7.0294	0.5825	0.4865	30.7221	1.0491	0.3541	0.6321	0.4038	33.2605	6.576	1.5158	2.7767	1.5753	7.8071	3.3625	0.4302	0.3839	0.3574	0.46	0.4964	2.1578	0.46	0.4302	2.5185	0.5494	417.093	4.3553	58.9323
R99-E02	206.49	2.5474	135.026	0.9541	119.475	1.3609	6.5767	0.6199	0.6247	15.0083	0.8766	0.4988	0.5908	0.6247	0.6732	0.6538	4.4119	4.717	0.5327	2.6781	0.8378	7.2693	0.6974	0.586	76.1746	2.5522	0.6247	0.7507	0.5666	21.8029	4.131	1.2204	4.01	3.1237	4.8817	9.8166	0.6683	0.6635	0.4407	0.6296	0.5327	1.6272	0.4891	0.7313	2.3004	0.5666	349.573	2.8331	46.6521
R99-E03	249.21	2.1187	139.258	1.1155	136.502	1.6492	5.9389	0.6701	0.6019	1.1838	0.7504	0.4133	0.4093	0.3973	0.4053	0.5578	2.52	32.8965	1.5128	1.3724	0.5618	1.3282	0.5096	0.4575	61.1904	2.1829	0.5778	0.5257	0.4294	10.8344	2.0786	0.6501	0.7383	0.4775	1.4847	5.5697	0.5377	0.5337	0.4374	0.3812	0.4294	0.8788	0.4173	0.3852	0.6782	0.3892	226.969	1.8338	27.9367
R99-E04	201.26	0.8447	71.4159	0.7155	86.2029	1.0583	4.0843	0.5714	0.6112	2.7378	0.9788	0.4323	0.6708	0.5217	0.5515	0.5317	1.5453	0.8944	0.482	1.5602	0.7105	2.8372	0.6112	0.5466	36.0433	1.436	0.4969	0.5714	0.477	30.9205	5.5054	1.5701	1.3565	1.0832	5.7538	3.493	0.4869	0.5118	0.4969	0.5317	0.6062	1.8583	0.5217	0.5018	1.1826	0.482	453.195	3.7415	61.2896
R99-E05	153.47	0.7884	30.5529	0.5864	79.7541	0.8275	4.7045	0.6907	0.6451	1.0751	0.9904	0.5604	0.6581	0.7884	0.6255	0.6581	1.4205	2.2415	0.5604	2.2936	0.6516	3.4469	0.8796	0.6516	32.2796	1.3423	0.6255	0.7624	0.632	24.858	4.6719	1.5508	1.3553	1.9352	6.5875	2.8214	0.7363	0.6386	0.5929	0.7102	0.7493	1.7397	0.5604	0.5669	1.2315	0.6907	395.304	3.2384	50.7325
R99-E06	189	1.09	59.2595	0.5608	105.048	1.2381	4.164	0.6561	0.5608	0.9206	0.9312	0.5608	0.5291	0.5079	0.5608	0.5291	2.0053	15.8731	0.9418	0.9365	0.6032	1.9259	0.5873	0.6138	53.0319	1.9788	0.6032	0.6931	0.5344	15.8043	2.7619	1.0476	1.1746	1.2646	8.5185	5.4021	0.5714	0.7302	0.4868	0.5397	0.5608	1.3228	0.4974	0.5926	0.9418	0.7037	278.938	2.3439	34.926
R99-E07	174.05	1.9362	102.161	0.8733	107.465	1.3962	3.8323	0.7584	0.6033	1.4823	0.8676	0.5458	0.5458	0.5343	0.5975	0.9595	1.5053	27.8026	1.5455	0.8388	0.6952	1.6834	0.6033	0.6205	47.4639	1.7524	0.5803	0.6607	0.6263	13.1917	2.2982	0.9882	1.4421	0.7871	6.1592	4.2172	0.6378	0.5573	0.5056	0.5401	0.6952	1.1778	0.5918	0.6435	0.948	0.609	243.944	2.1029	30.3594
R99-E08	161.68	1.9978	120.91	0.9587	154.229	1.7071	5.3933	0.9277	0.6432	1.4164	0.8164	0.6865	0.5814	0.668	0.7546	0.8968	2.5791	28.9025	1.3916	0.8226	0.6556	1.3916	0.6494	0.5134	78.6607	2.5482	0.6742	0.6989	0.5443	11.0897	2.2575	0.9896	0.8226	0.6927	2.1215	6.3953	0.6927	0.7484	0.5628	0.7608	0.7669	1.2061	0.6494	0.6989	0.9463	0.6618	238.567	1.7504	28.3149
R99-E09	157.44	1.2449	79.8387	0.8765	118.469	1.5371	5.005	0.8003	0.7177	1.1496	0.9654	0.6542	0.5907	0.5653	0.686	0.8892	2.0897	20.0772	1.1687	1.048	0.8448	1.9309	0.6987	0.6161	54.0134	1.9563	0.7368	0.7368	0.6352	15.4279	2.8582	0.9654	1.7403	0.7431	6.4023	5.0495	0.6224	0.7241	0.6606	0.6542	0.6479	1.3338	0.6352	0.6288	1.1941	0.6733	267.476	2.2167	32.812
R99-E10	193.47	1.0337	84.6423	0.8373	95.0831	1.2095	3.8248	0.6668	0.522	1.3645	0.7133	0.4755	0.4703	0.4703	0.5272	0.6357	1.2973	17.5528	0.9769	0.9665	0.6202	1.716	0.5789	0.5737	30.702	1.2198	0.5117	0.6151	0.5789	11.2574	2.1812	0.858	1.0803	0.8528	2.9358	2.7084	0.553	0.6254	0.5841	0.5789	0.6513	1.2198	0.5737	0.6254	0.9097	0.491	243.476	2.0778	29.6579
R99-E11	157.23	1.3102	89.3997	0.9032	111.463	1.3993	4.7384	0.8523	0.9604	1.3484	0.8396	0.6487	0.636	0.6169	0.6551	0.6933	1.7173	14.5077	0.9095	1.7872	0.8268	2.1561	0.6615	0.7569	41.8823	1.5519	0.6297	0.6678	0.776	11.9891	2.3342	1.1385	1.501	0.7887	2.0671	4.5221	0.6869	0.6551	0.6678	0.7314	0.7314	1.2657	0.8268	0.776	1.3611	0.8841	255.612	2.1498	28.9837
R99-E12	127.59	1.4969	103.233	1.1678	120.946	1.395	5.7683	0.8308	0.8935	1.8339	0.7837	0.7681	0.6897	0.7132	0.7759	0.7994	1.9828	7.7119	1.0502	2.6804	1.1207	3.1741	0.917	0.7524	53.8267	2.3042	0.8464	0.8229	0.8699	19.3582	3.5033	1.301	2.022	1.0032	3.9892	6.1366	0.917	0.8464	0.7759	0.9248	0.9483	1.5675	0.7916	0.7681	1.5988	0.917	299.95	2.6412	37.3684
R99-F01	132.7	0.9043	64.8507	0.9645	26.088	1.055	1.914	0.6556	0.7385	2.3737	0.7159	0.6707	0.8063	0.7762	0.7837	0.7611	0.8214	1.3715	0.8515	1.7935	1.7106	2.9991	0.844	0.6707	24.4076	1.1981	0.6104	1.0625	0.7385	14.9957	3.3835	1.0927	8.598	1.6051	2.8936	4.9207	0.7611	0.7536	0.7762	0.7234	0.7234	1.6126	0.7536	1.6804	1.2886	0.844	306.809	2.7128	36.1554
R99-F02	214.32	2.1137	144.171	1.0872	129.893	1.5585	7.1017	0.7186	0.7326	1.8291	0.7606	0.5366	0.5179	0.5973	0.7559	0.6859	2.0064	25.8638	1.1385	2.753	1.2598	2.9023	0.5786	0.5226	47.0475	1.6004	0.4853	0.6439	0.5506	20.6565	3.5135	0.9705	1.6984	0.7559	6.3038	4.7733	0.5833	0.4993	0.5926	0.7092	0.5413	1.6191	0.5553	0.5739	1.6284	0.4899	315.652	2.487	39.4745
R99-F03	276.5	1.8517	104.665	0.6908	126.694	1.3743	5.4647	0.6799	0.5533	1.5335	0.604	0.5172	0.3544	0.3797	0.4195	0.5823	2.4738	27.2224	1.1429	1.425	0.5895	1.8336	0.4412	0.3834	73.1427	2.5533	0.5389	0.557	0.434	19.2947	3.3671	0.7595	1.349	0.6655	3.2911	6.7269	0.5244	0.5244	0.3544	0.3797	0.4882	1.0778	0.4231	0.4231	0.9873	0.4051	317.117	3.0199	42.4918
R99-F04	188.36	0.8547	40.3695	0.6477	39.4829	0.7379	1.9643	0.5415	0.5787	18.1833	1.083	0.5628	0.7592	0.5097	0.5628	0.515	1.0671	5.7231	1.0565	0.9715	0.9609	1.0087	0.5521	0.5787	26.7997	1.2317	0.4884	0.9025	0.6477	10.1508	1.9165	0.9715	1.0299	0.6424	1.1414	2.5005	0.6158	0.5203	0.5044	0.6318	0.5681	0.9131	0.5468	0.7433	0.6902	0.5415	235.044	2.0386	28.695
R99-F05	227.06	0.7619	63.4277	0.6738	65.828	0.8764	3.488	0.5593	0.4889	2.0831	0.7751	0.4712	0.5637	0.4272	0.6254	0.5505	1.3521	1.4005	0.4624	1.5635	0.7751	5.4214	0.6782	0.4889	30.0183	0.9777	0.3964	0.5285	0.4272	27.0279	5.0515	1.4578	1.3829	3.488	10.5522	4.0386	0.4712	0.4845	0.4845	0.5637	0.6562	1.8805	0.5593	0.5417	2.3077	0.6474	382.526	3.8536	52.1445
R99-F06	233.33	1.0929	58.1442	0.5829	74.2327	0.9643	3.4629	0.6	0.54	0.9129	0.7757	0.4371	0.4286	0.4671	0.4843	0.4757	1.1871	6.9943	0.5486	1.5171	0.6	2.01	0.4586	0.5914	20.9014	0.8571	0.4714	0.5914	0.5529	25.89	4.9071	1.4271	1.2043	0.9086	2.1043	2.6314	0.39	0.4457	0.3943	0.51	0.5657	1.77	0.5743	0.5014	1.0286	0.4757	397.902	3.7586	53.4685
R99-F07	190.69	1.2796	119.713	0.9439	141.933	1.6467	6.0465	0.7971	0.7761	1.2901	0.8286	0.6345	0.5454	0.5506	0.6241	0.6136	2.3494	2.6588	0.5873	1.5156	0.8391	2.019	0.708	0.5297	56.3587	2.0714	0.6031	0.7342	0.6083	13.6452	2.8633	1.0016	1.0646	0.7814	1.8512	4.9138	0.6398	0.6712	0.6293	0.5926	0.666	1.3268	0.5611	0.7027	1.2376	0.5611	255.389	2.2183	31.963
R99-F08	192.92	1.4825	99.1656	0.876	126.794	1.6639	4.5926	0.6946	0.6479	1.2751	0.6168	0.4872	0.5132	0.5857	0.5495	0.5495	2.3792	30.9507	1.3788	0.6428	0.5339	1.016	0.5443	0.5961	57.2414	1.8298	0.6013	0.5546	0.5598	7.853	1.4773	0.679	0.6687	0.5184	1.695	5.1317	0.6842	0.6428	0.4717	0.4561	0.5961	0.9019	0.508	0.508	0.6687	0.508	196.196	1.5965	23.1236
R99-F09	94.32	1.2723	48.7087	1.0391	85.3304	1.1981	4.5273	0.986	0.933	1.3041	1.2193	1.1769	1.0391	0.88	0.986	0.986	1.9721	2.5234	0.9542	2.1205	1.1875	4.6334	1.0603	1.1239	32.9637	1.76	1.0073	1.0497	1.0073	15.7026	3.0642	1.5692	1.9509	2.4704	5.3225	3.8064	0.8906	1.0073	1.0073	1.1345	1.0179	1.76	0.8694	1.0815	2.322	0.986	259.999	2.428	31.1401
R99-F10	192.16	1.5247	97.4747	0.8586	128.037	1.3738	4.517	0.8118	0.6349	1.0252	0.6609	0.484	0.5152	0.4527	0.4944	0.6817	1.9098	29.8601	1.4727	0.7025	0.5204	1.5924	0.5568	0.6141	48.5214	1.7277	0.5828	0.6089	0.5048	11.6204	1.9359	0.8691	0.9783	0.8066	1.2177	4.033	0.6401	0.588	0.5152	0.4631	0.5672	1.072	0.5724	0.5724	0.9159	0.6297	244.407	1.9567	29.7821
R99-F11	233.12	1.8788	95.679	0.9094	129.206	1.5914	5.6622	0.682	0.5576	1.8231	0.592	0.4418	0.4547	0.459	0.3818	0.5448	1.5442	21.5122	1.0981	0.7335	0.5405	1.2611	0.3989	0.3946	33.656	1.3212	0.4804	0.6048	0.4247	14.2242	2.5094	0.8708	0.8536	0.7807	0.8922	2.7539	0.3904	0.4075	0.4504	0.4161	0.4461	0.9995	0.4547	0.3689	0.6735	0.4118	287.612	2.651	37.4008
R99-F12	106.81	1.1235	56.372	0.8894	101.331	1.3857	4.803	1.0112	0.9269	1.8725	1.161	0.7865	0.9363	0.8145	0.9924	0.9363	2.2751	3.3799	0.8801	1.4325	1.0486	4.1851	0.9456	0.9737	44.3879	1.9193	0.852	0.8988	1.0018	18.463	3.0896	1.3576	2.2938	1.3576	5.8329	5.2056	1.0954	1.0205	0.9456	0.9831	1.0112	2.0785	1.0954	0.9363	1.9006	1.0392	313.018	2.5373	38.9295
R99-G01	353.78	2.9453	130.74	0.8819	123.258	1.6931	6.521	0.6586	0.5258	1.0741	0.619	0.3448	0.3675	0.3477	0.3505	0.6106	3.2252	31.5225	1.4953	1.7921	0.5201	1.1448	0.4466	0.3759	68.3816	2.7644	0.5568	0.6303	0.3364	15.8234	3.081	0.7632	0.4636	0.2968	2.0578	7.4312	0.4579	0.5003	0.3731	0.342	0.359	1.0685	0.3364	0.3251	0.6671	0.3844	291.142	2.7333	38.7784
R99-G02	241.8	0.9884	77.4114	0.7444	77.1756	1.1869	3.7014	0.6162	0.5873	1.0794	0.5542	0.4342	0.5046	0.5376	0.5252	0.5211	1.8031	10.5129	0.8768	1.5881	0.7361	1.5343	0.579	0.6079	29.4335	1.1745	0.5376	0.5418	0.4467	7.9198	1.8238	0.7444	0.5625	0.397	1.2779	2.7709	0.4467	0.4342	0.4218	0.5046	0.4301	0.9926	0.4467	0.426	0.9802	0.4384	200.766	1.8362	25.3351
R99-G03	177.99	1.0113	43.177	0.7191	37.3901	0.7304	2.0844	0.6517	0.5787	1.0619	0.6686	0.6124	0.6012	0.5562	0.5394	0.5843	1.0956	1.9046	0.6012	1.0731	1.1012	2.989	0.618	0.6461	41.8173	1.7305	0.6068	0.7472	0.6517	17.6866	3.4047	0.9888	2.7024	0.8484	2.2305	7.5061	0.854	0.8933	0.5337	0.6068	0.618	1.3315	0.7079	0.8428	1.0057	0.5394	334.898	3.1463	42.9747
R99-G04	328.55	2.0332	113.183	0.8005	102.813	1.2966	5.4787	0.6483	0.4566	1.3392	0.6483	0.3409	0.5083	0.3987	0.3531	0.49	1.9601	16.6703	0.8888	1.7227	0.9496	2.2676	0.5205	0.4352	38.4176	1.2479	0.3896	0.3987	0.4139	20.1615	4.0329	1.1323	0.8096	0.3652	1.9784	3.0193	0.3592	0.3713	0.3926	0.3926	0.4779	1.741	0.4322	0.4505	0.9709	0.4444	335.409	3.2507	45.0985
R99-G05	126.82	1.0172	44.8672	0.7333	33.2206	1.0724	1.995	0.7728	0.7254	1.3563	0.9462	0.7018	0.9147	0.8437	0.7412	0.8201	1.0645	1.7821	0.7806	1.2064	1.0093	1.6165	0.8201	0.891	12.1512	0.9857	0.7491	1.0093	0.7333	17.1978	3.2645	1.1591	1.4745	0.891	2.3498	2.3498	0.7412	0.6781	0.7806	0.7649	0.7254	1.4903	0.7728	0.8595	0.9935	0.6939	362.359	3.0043	45.0485
R99-G06	227.33	1.6232	90.5496	0.7214	90.6332	1.0557	4.1173	0.607	0.5499	1.9619	0.9589	0.4399	0.5674	0.4575	0.4487	0.5586	1.8739	18.1495	0.915	1.2889	0.8622	1.368	0.4795	0.4971	36.7609	1.2845	0.4927	0.4487	0.4487	20.2565	3.7038	1.2713	0.6246	0.3915	5.2742	4.4912	0.5279	0.4619	0.4795	0.4663	0.4883	1.7859	0.4575	0.4839	0.8754	0.4751	341.269	3.1144	45.0966
R99-G07	169.99	2.559	132.46	1.1295	127.801	1.7589	5.0591	0.8059	0.6471	1.3295	0.7118	0.6765	0.6471	0.6	0.6824	0.9177	1.9766	22.2895	1.2177	1.2471	0.8883	1.5354	0.5765	0.5647	69.8804	2.4472	0.7824	0.7059	0.5824	5.8356	1.4648	0.7295	0.6471	0.553	1.7707	8.1475	0.6765	0.6883	0.6412	0.6059	0.5118	1.2354	0.6118	0.6059	1.0118	0.653	157.874	1.2589	17.8951
R99-G08	145.8	1.5981	81.2087	0.8779	88.8083	1.1866	3.8272	0.7545	0.9122	5.9946	1.0288	0.8848	0.9328	0.6173	0.7408	0.7476	1.4061	8.8068	0.8505	1.5021	1.2346	1.4678	1.0082	0.7339	55.3577	2.0234	0.6996	0.8368	0.7476	10.6243	2.3526	0.9945	1.2415	0.7408	2.8601	13.1141	1.118	1.2072	0.7476	0.775	0.7476	1.3718	0.7202	1.0837	1.2415	0.7408	210.203	1.8039	24.4723
R99-G09	174.26	2.6511	156.188	1.2739	148.366	1.842	5.8991	0.8895	0.6542	1.5838	0.9009	0.6542	0.8263	0.5279	0.6657	0.8378	1.7789	29.1109	1.4805	1.3887	0.8321	1.8306	0.6771	0.6312	58.985	2.0945	0.6714	0.6657	0.5566	10.3291	2.2093	0.9927	0.7288	0.5451	3.4029	5.572	0.7058	0.7116	0.6427	0.6714	0.6025	1.2797	0.5566	0.6714	1.2165	0.6484	233.863	2.0027	26.9934
R99-G10	125.04	1.2156	96.7656	0.9996	72.8221	1.1036	3.9906	0.7837	0.7277	3.6547	1.1196	0.8157	0.7597	0.8077	0.8637	0.8557	1.9433	2.9909	0.9996	2.3432	1.0236	1.4715	0.8797	0.8557	35.0115	1.4795	0.9517	0.8877	0.7757	23.6796	4.7583	1.4955	0.9277	0.7197	4.9262	4.4384	0.9597	0.8877	0.7917	0.8237	0.8237	2.4711	0.9597	0.7597	0.9836	0.7917	372.787	3.3668	49.1105
R99-G11	176.68	1.398	100.174	0.8263	116.927	1.4093	5.4222	0.8094	0.7641	1.0641	0.6792	0.549	0.7584	0.5603	0.583	0.6735	1.8281	19.1417	1.0584	1.8112	0.8377	1.8508	0.6792	0.6169	36.8288	1.4093	0.6452	0.583	0.583	10.7877	2.3262	1.0018	0.9452	0.6056	1.7319	3.5827	0.5603	0.6226	0.7245	0.7528	0.7358	1.6753	0.583	0.6396	1.0867	0.6056	242.655	2.0432	29.3238
R99-G12	108.81	1.737	81.6588	1.1672	121.629	1.3143	5.7625	0.9558	1.0477	1.8197	0.9466	0.8272	0.9742	1.0477	0.9099	0.8639	2.5366	11.7916	1.2224	2.4907	1.2959	2.0495	0.9007	0.8915	53.03	2.4079	0.9283	1.0661	1.1672	12.5912	2.6745	1.4613	1.2315	0.9191	3.2167	7.6926	1.0661	1.011	1.0753	1.0294	1.011	1.6819	0.8547	0.9742	1.6451	0.8731	229.647	2.0219	26.8459
R99-H01	237.9	1.198	97.4964	0.7608	112.242	1.5301	5.6832	0.723	0.7104	1.7276	0.7146	0.4708	0.4918	0.5044	0.6053	0.6095	2.7491	1.8495	0.4119	2.0513	0.7062	2.5389	0.5212	0.475	56.4995	2.1858	0.5717	0.5591	0.496	15.1453	2.9046	0.9752	1.3073	0.8659	2.4759	8.0792	0.6389	0.7062	0.4792	0.5086	0.4834	1.198	0.4708	0.5086	1.3577	0.5086	254.838	2.2573	33.7543
R99-H02	237.51	1.0021	53.943	0.5852	63.8163	0.8842	3.3978	0.5473	0.5642	3.5493	0.6737	0.5052	0.6568	0.5137	0.4589	0.4463	1.2631	11.8606	0.7915	1.7852	0.8842	0.8589	0.4842	0.8463	30.2514	1.221	0.4758	0.64	0.501	11.8648	2.3283	0.8252	0.5516	0.4337	1.1368	6.8713	0.6947	0.6905	0.4673	0.5305	0.5095	1.1831	0.4463	0.4547	0.8463	0.5179	270.199	2.2778	35.2701
R99-H03	284.22	1.344	61.3152	0.5137	77.2184	0.8303	3.3706	0.5207	0.4961	1.6888	1.2842	0.4011	0.4363	0.3378	0.3694	0.4468	1.6677	20.6988	1.059	1.147	0.4539	0.5911	0.5278	0.6509	29.9557	1.1822	0.387	0.6228	0.4539	29.7164	5.5732	1.3229	0.5524	0.3589	1.2314	2.9836	0.4679	0.5031	0.3624	0.3659	0.4539	1.8542	0.4152	0.373	0.3694	0.3518	457.273	4.3417	64.0068
R99-H04	280.6	0.8589	54.5868	0.5061	69.5121	0.7698	3.9736	0.556	0.5274	1.2473	0.7698	0.4134	0.6593	0.4811	0.4348	0.4134	1.2438	10.6772	0.7341	1.7213	0.9444	2.402	0.5453	0.4348	21.7962	0.8339	0.417	0.6272	0.5061	32.1527	7.1526	1.6073	0.8482	0.4134	4.2766	2.4234	0.3956	0.4063	0.4027	0.4277	0.4989	2.3735	0.417	0.5453	1.7249	0.4419	405.07	4.3799	56.6147
R99-H05	214.68	2.1241	97.1874	0.885	132.384	1.7049	5.8832	0.9037	0.5636	1.4347	0.8897	0.4518	0.6382	0.4658	0.4984	0.7546	2.7716	33.2638	1.458	1.4207	0.7872	1.118	0.5357	0.545	78.853	3.0557	0.6754	0.5497	0.5357	10.5647	2.0123	0.9549	0.7267	0.5124	8.6874	9.3256	0.6382	0.6335	0.4844	0.5916	0.5636	1.4254	0.4844	0.4658	0.8198	0.4472	221.411	1.7515	27.1989
R99-H06	181.56	1.5973	108.701	0.9473	95.108	1.3053	4.3071	0.8262	0.6334	1.8451	0.6885	0.7491	0.7215	0.7215	0.6114	0.6719	1.6413	23.3199	1.2668	1.5036	0.738	1.4761	0.8151	0.6224	27.4452	1.1566	0.6059	0.6059	0.6059	12.0124	2.1535	1.0575	0.738	0.5122	1.432	3.2165	0.6003	0.5673	0.6114	0.6003	0.5563	1.3274	0.5948	0.6114	0.9473	0.6334	267.005	2.4124	33.1237
R99-H07	176.35	1.0717	80.2361	0.9073	48.3288	1.0604	2.4836	0.7768	0.8392	2.2341	0.9526	0.55	0.947	0.6181	0.7598	0.6691	0.8959	0.7372	0.5954	1.0377	2.9996	2.7275	0.7201	0.7201	37.6684	1.497	0.533	0.8506	0.5387	18.1226	3.8332	1.3269	3.096	0.8619	4.7858	4.9276	0.6691	0.6181	0.7768	0.7428	0.7939	1.6047	0.7485	1.0434	1.463	0.6861	316.357	2.6991	41.4449
R99-H08	96.25	1.1637	18.9411	1.1117	22.7334	0.9663	2.1715	0.9143	0.9351	1.1741	1.1845	1.0078	1.0702	1.1221	1.0182	1.1325	1.2988	1.2156	1.0806	1.3091	2.1715	3.8235	1.2988	1.1741	11.907	1.3819	1.0702	1.091	1.0702	11.2005	2.8677	1.2884	3.8443	1.5585	3.5222	16.5929	1.413	1.5169	1.091	1.091	1.2364	1.4962	0.9974	1.413	1.4234	0.9039	245.382	2.5248	27.3674
R99-H09	191.37	1.9491	120.543	0.9249	148.191	1.5729	6.6364	0.7891	0.7838	1.6774	0.8413	0.5226	0.7891	0.6009	0.695	0.8309	2.4926	25.579	1.1757	1.5415	0.8674	1.8707	0.6532	0.5644	88.3168	2.9002	0.7473	0.6323	0.5226	13.2363	2.5501	0.9719	0.6741	0.6166	3.3287	9.615	0.7316	0.8465	0.6009	0.6009	0.5853	1.4579	0.5382	0.5644	1.0869	0.5069	249.279	2.1216	31.1285
R99-H10	151.02	1.8673	106.087	0.98	139.42	1.576	5.8271	0.8873	0.8277	1.715	0.9204	0.6158	0.7483	0.6688	0.6224	0.7284	2.5494	23.3283	1.3376	1.6753	1.0529	1.6356	0.8078	0.7416	61.6813	2.2381	0.7814	0.9006	0.6555	12.0714	2.556	1.1257	0.8608	0.6158	3.536	6.6747	0.7151	0.8343	0.7085	0.7747	0.682	1.5098	0.7085	0.7747	1.2714	0.7085	241.851	1.9335	29.8507
R99-H12(WT)	142.61	1.4866	147.161	1.2833	140.78	1.8653	6.0376	0.9677	0.9116	0.9887	0.7854	0.7573	0.7784	0.6101	0.8204	0.9256	1.5778	6.7739	0.8555	1.5006	0.8906	1.157	0.6942	0.8415	42.1091	1.6269	0.9326	0.7503	0.6101	7.5874	1.9003	1.0028	0.7363	0.7223	1.6759	3.6114	0.7012	0.7994	0.7153	0.6802	0.8625	1.157	0.8485	0.7223	1.0939	0.7784	153.886	1.4726	16.7314
R99-H11(pET28)	172.98	1.8673	92.7694	0.7804	112.061	1.6014	5.677	0.8151	0.7978	1.5146	1.2487	0.5608	1.0001	0.6937	0.7689	0.5955	1.3759	20.0951	1.1042	2.0523	1.3007	2.4165	0.8961	0.8151	29.2004	1.3007	0.6244	0.6417	0.5665	16.3663	3.0466	1.399	1.1736	0.9134	24.9166	4.1624	0.659	0.6301	0.6764	0.6186	0.6475	2.509	0.7284	0.7804	1.902	0.7284	289.934	2.5148	36.5944
[truncated: 129 more columns]

## Sheet: R98
Sample Name	Mean Intensity	m/z 115. 15	m/z 117. 18	m/z 118. 18	m/z 119. 13	m/z 120. 12	m/z 122. 13	m/z 123. 08	m/z 124. 11	m/z 127. 10	m/z 129. 10	m/z 130. 10	m/z 131. 10	m/z 132. 93	m/z 133. 12	m/z 135. 12	m/z 136. 11	m/z 137. 09	m/z 138. 12	m/z 139. 09	m/z 140. 17	m/z 144. 11	m/z 145. 10	m/z 146. 10	m/z 147. 10	m/z 148. 12	m/z 149. 11	m/z 150. 12	m/z 151. 15	m/z 152. 10	m/z 153. 10	m/z 154. 12	m/z 155. 12	m/z 155. 63	m/z 160. 12	m/z 161. 12	m/z 162. 11	m/z 163. 11	m/z 164. 12	m/z 165. 12	m/z 166. 12	m/z 167. 13	m/z 168. 11	m/z 169. 12	m/z 170. 13	m/z 172. 09	m/z 172. 77	m/z 173. 09	m/z 173. 92
R98-A01	210.24	0.1522	7.5867	0.3139	0.88	0.2188	0.2426	0.3139	0.1807	0.1379	0.1903	0.4138	0.1617	0.1712	0.2331	1.3318	0.3092	1.8455	0.2473	0.1617	0.1665	0.6184	0.2711	22.6554	2.735	0.5993	0.2283	0.1903	0.1712	3.5008	0.2664	0.176	0.2473	0.1855	0.352	0.1903	0.2093	0.2331	0.8181	0.2473	0.2616	0.1665	0.1807	0.7658	0.195	421.962	1.5792	50.4241	0.8704
R98-A02	155.37	0.1931	10.9741	0.3862	0.7209	0.2253	0.2639	0.4312	0.2381	0.206	0.2253	0.4377	0.251	0.1867	0.251	1.2615	0.2961	0.9268	0.2768	0.2253	0.2317	0.4377	0.2768	19.0003	2.1626	0.6308	0.2381	0.206	0.2639	1.3002	0.3089	0.1738	0.2188	0.2381	0.3347	0.2317	0.2124	0.2381	0.8432	0.1995	0.2381	0.2703	0.2253	0.6308	0.2124	446.951	1.2937	49.0648	0.7531
R98-A03	163.96	0.1891	5.4649	0.2623	0.8417	0.2379	0.2501	0.4269	0.1952	0.2196	0.3111	0.3111	0.2135	0.2013	0.244	1.2564	0.2684	0.9332	0.2074	0.2135	0.1586	0.4574	0.2257	21.9204	2.3787	0.8722	0.2623	0.1952	0.183	1.6346	0.2501	0.2196	0.2135	0.2074	0.3233	0.244	0.2623	0.2318	0.9332	0.2013	0.2013	0.2013	0.1891	0.5611	0.2257	487.836	1.4028	56.5758	0.7197
R98-A04	154.9	0.2195	7.2497	0.3615	0.9361	0.2518	0.2389	0.3551	0.2518	0.213	0.2776	0.3744	0.2066	0.2195	0.2841	1.3944	0.3551	1.1233	0.2259	0.4777	0.2195	0.4713	0.2905	18.5472	2.253	0.581	0.2453	0.2195	0.2001	1.2137	0.2453	0.2066	0.2195	0.2647	0.3551	0.2066	0.2389	0.3486	0.7747	0.2324	0.2259	0.2195	0.213	0.6778	0.213	441.86	1.3234	49.4313	0.6778
R98-A05	184	0.1902	6.6195	0.3043	1.2772	0.2772	0.2663	0.3098	0.1848	0.1902	0.2391	0.3315	0.1685	0.1848	0.2935	1.663	0.2717	0.8533	0.1848	0.2609	0.1957	0.4185	0.288	20.5324	2.4239	0.9022	0.2228	0.1902	0.1793	1.3859	0.25	0.2011	0.1957	0.2011	0.3152	0.2228	0.1957	0.2609	0.8641	0.1957	0.2065	0.1902	0.1848	0.6739	0.163	456.001	1.5869	53.3799	0.7119
R98-A06	157.78	0.1901	7.7069	0.3169	0.7289	0.2282	0.2725	0.3739	0.2282	0.2155	0.2408	0.3042	0.1965	0.2662	0.2725	1.2042	0.3296	0.8429	0.2472	0.2599	0.1965	0.4183	0.2852	21.5426	2.5035	0.7732	0.2408	0.2155	0.2218	0.9951	0.1901	0.1838	0.2028	0.2599	0.2599	0.2218	0.2789	0.2725	0.938	0.2408	0.2155	0.2155	0.2028	0.5958	0.2282	473.259	1.5148	52.6681	0.7859
R98-A07	244.64	0.1349	7.5213	0.2861	0.7644	0.1758	0.2126	0.4047	0.1267	0.1349	0.2085	0.2902	0.1553	0.1431	0.2003	1.4389	0.2248	0.8053	0.1553	0.1308	0.1431	0.372	0.1962	24.1664	3.0004	0.7072	0.2085	0.1758	0.1472	1.0424	0.1921	0.1472	0.1799	0.1594	0.2003	0.1553	0.1512	0.2453	0.9851	0.1921	0.1472	0.1512	0.1308	0.4823	0.233	464.611	1.9253	57.6078	0.9156
R98-A08	164.47	0.225	12.0329	0.3831	1.2951	0.2615	0.2797	0.4013	0.225	0.2067	0.2615	0.4074	0.1946	0.2858	0.2797	2.0612	0.377	1.137	0.2554	0.2493	0.1946	0.529	0.2797	22.3512	2.7301	0.5959	0.225	0.225	0.2067	1.4167	0.2493	0.2189	0.2371	0.2493	0.4074	0.2493	0.2432	0.2554	0.8938	0.2554	0.2371	0.2128	0.2311	0.6567	0.2615	440.974	1.5322	50.2476	0.754
R98-A09	209.59	0.1336	7.2285	0.291	1.0115	0.2195	0.2099	0.3054	0.1718	0.167	0.2147	0.4008	0.2099	0.2052	0.1956	1.6079	0.334	0.7539	0.2052	0.1813	0.1622	0.458	0.1909	21.299	2.5431	0.8254	0.2815	0.1765	0.1813	1.3455	0.2004	0.1718	0.2099	0.2052	0.3054	0.229	0.2386	0.2386	0.8636	0.2052	0.1765	0.1861	0.1575	0.7586	0.1765	402.086	1.5841	47.3694	0.8111
R98-A10	242.41	0.1196	6.9139	0.2434	0.7714	0.1939	0.2228	0.2929	0.1691	0.1526	0.1898	0.3836	0.1733	0.1568	0.1774	1.4975	0.2888	0.6477	0.1691	0.1733	0.1444	0.3919	0.2228	19.8877	2.6236	0.6559	0.1733	0.1361	0.1238	1.1014	0.165	0.1403	0.1609	0.165	0.2186	0.1526	0.2393	0.2063	0.6683	0.1939	0.1856	0.1898	0.1485	0.4414	0.1691	394.552	1.6047	48.5167	0.8787
R98-A11	222.19	0.144	7.0166	0.2835	0.9451	0.2475	0.225	0.3466	0.171	0.1305	0.2205	0.4006	0.171	0.1665	0.198	1.8318	0.2475	0.7516	0.1665	0.1665	0.171	0.5176	0.18	23.7952	2.9435	0.8371	0.1845	0.2025	0.171	1.4267	0.225	0.144	0.1935	0.171	0.2925	0.1845	0.1935	0.2205	0.8821	0.18	0.216	0.1935	0.135	0.5041	0.189	445.354	2.0028	54.7376	0.9451
R98-A12	242.24	0.1404	4.479	0.2725	0.5738	0.1816	0.2147	0.3385	0.1569	0.1651	0.1775	0.2931	0.1486	0.1238	0.1899	1.1146	0.2518	0.8215	0.1775	0.4582	0.2064	0.3798	0.1816	19.9469	2.3819	0.5119	0.1775	0.1569	0.1362	1.3747	0.1775	0.1404	0.1445	0.161	0.2312	0.1693	0.161	0.2147	0.6894	0.1775	0.1693	0.1734	0.1816	0.45	0.1527	412.85	1.6884	51.341	0.8586
R98-B01	89.58	0.3795	0.7591	0.3684	1.2949	0.3461	0.4019	0.7926	0.3795	0.5805	0.3907	0.5693	0.3684	0.3572	0.4019	0.9824	0.7591	1.1051	0.4242	0.3572	0.3349	0.5916	0.4242	21.9132	2.5564	0.8372	0.4019	0.4354	0.3461	0.7368	0.413	0.3572	0.4465	0.3572	0.5805	0.4354	0.4242	0.4689	1.3731	0.3684	0.5135	0.4242	0.3684	0.7368	0.3349	568.627	1.641	59.0753	0.8819
R98-B02	150.04	0.2466	13.5964	0.5132	1.233	0.2399	0.3332	0.4665	0.2133	0.4266	0.2466	0.4799	0.2199	0.2066	0.3332	1.5796	1.113	1.2863	0.2333	0.1733	0.1999	0.5865	0.2866	25.7265	3.0659	0.8664	0.2799	0.3066	0.2466	0.6732	0.2466	0.2133	0.2466	0.2199	0.4599	0.2666	0.2266	0.2733	1.333	0.2866	0.3266	0.2333	0.1999	1.0997	0.2533	477.666	1.5129	54.7121	0.8331
R98-B03	208.1	0.1586	6.9247	0.2979	1.5329	0.2643	0.197	0.3268	0.1538	0.3172	0.2547	0.3556	0.1874	0.1778	0.2162	2.2682	1.014	1.062	0.1874	0.1538	0.1634	0.4998	0.2307	20.5386	2.7439	0.7016	0.2259	0.2066	0.1826	0.4613	0.2018	0.173	0.173	0.1682	0.2883	0.1826	0.2211	0.2355	1.0236	0.2066	0.2307	0.1586	0.1394	0.6103	0.1874	434.959	1.5041	51.9232	0.8121
R98-B04	119.24	0.3019	3.5644	0.3606	1.0483	0.3187	0.3019	0.4529	0.2516	0.4361	0.3439	0.52	0.3019	0.2768	0.3187	1.8535	1.0651	1.258	0.3103	0.3103	0.26	0.6206	0.3271	21.2771	2.667	0.8135	0.3103	0.3606	0.3271	0.8554	0.3942	0.2432	0.2935	0.3271	0.4948	0.2851	0.2935	0.3103	1.0903	0.3355	0.2935	0.3271	0.2851	0.9645	0.3271	507.623	1.7948	56.3085	0.8135
R98-B05	160.25	0.181	4.9735	0.2559	1.5476	0.2808	0.2995	0.2933	0.2122	0.3869	0.3744	0.312	0.2184	0.1997	0.2746	2.1903	1.0109	1.092	0.2808	0.2621	0.2059	0.6427	0.2247	22.2528	2.8268	0.6178	0.2371	0.2621	0.2309	0.9173	0.2871	0.2122	0.2434	0.2122	0.5117	0.2559	0.2871	0.2371	1.2044	0.2247	0.2871	0.2122	0.2309	1.0047	0.2621	462.099	1.4103	52.4121	0.7676
R98-B06	111.14	0.2699	7.0449	0.4589	0.8458	0.2969	0.3059	0.4859	0.2609	0.4319	0.3599	0.4049	0.3059	0.3059	0.3689	1.4216	0.8008	0.7738	0.2879	0.2879	0.2789	0.4679	0.2789	20.2531	2.0244	0.8098	0.2969	0.3599	0.3509	0.5129	0.3599	0.3059	0.3509	0.2519	0.4679	0.3059	0.3419	0.3059	1.3226	0.3059	0.2969	0.3149	0.2969	0.6658	0.2879	454.952	1.3136	48.8288	0.8008
R98-B07	218.66	0.1326	2.7212	0.2058	1.3171	0.2515	0.1738	0.3384	0.1601	0.2561	0.2287	0.2881	0.1692	0.1829	0.1875	2.0946	0.6403	0.6083	0.2012	0.2104	0.1463	0.3293	0.2332	24.3763	3.4255	0.9101	0.2195	0.1738	0.1829	0.3476	0.1967	0.1463	0.1463	0.1829	0.215	0.1784	0.2332	0.215	1.0885	0.2424	0.1967	0.1875	0.1601	0.5214	0.1738	479.842	1.962	61.0825	0.9558
R98-B08	110.15	0.2724	20.2912	0.5538	0.7354	0.2996	0.3541	0.5538	0.2724	0.463	0.3541	0.3268	0.2905	0.227	0.2996	1.2438	1.1167	0.9714	0.3178	0.2724	0.2633	0.5084	0.3541	23.8682	2.6783	0.8171	0.2814	0.3087	0.2814	0.5901	0.345	0.2724	0.3178	0.3087	0.5175	0.2905	0.3904	0.4176	1.2347	0.3541	0.3268	0.2724	0.2633	1.4163	0.3178	502.413	1.3981	54.9269	0.8171
R98-B09	101.86	0.3829	8.3648	0.4614	0.9131	0.3436	0.2945	0.6774	0.3142	0.5203	0.3142	0.54	0.2847	0.2553	0.3044	1.4138	1.0701	1.2272	0.324	0.2651	0.2651	0.54	0.3436	31.3384	4.0253	0.8051	0.3927	0.4516	0.3044	0.6185	0.3927	0.324	0.4418	0.3927	0.54	0.3338	0.432	0.4418	1.7574	0.3044	0.324	0.3338	0.2945	0.9425	0.3142	581.802	1.7574	66.1523	0.9523
R98-B10	232.55	0.1591	3.5993	0.1849	0.645	0.1892	0.172	0.3225	0.1548	0.1806	0.1806	0.2365	0.1505	0.1333	0.1763	1.0363	0.3268	0.3311	0.1634	0.1548	0.1333	0.2623	0.1806	23.4662	2.8381	0.6622	0.1548	0.1419	0.1462	0.3096	0.1462	0.1677	0.1376	0.1634	0.1763	0.1333	0.1763	0.1849	0.9202	0.1806	0.1548	0.1333	0.1505	0.387	0.1419	479.525	1.9652	60.0825	0.9546
R98-B11	106.42	0.3477	100.921	2.2458	0.4416	0.3195	0.5262	0.5638	0.3007	0.5826	0.3007	0.3665	0.4135	0.2349	0.3477	0.6672	1.1088	1.231	0.2913	0.4604	0.2631	0.4604	0.4041	32.3062	3.1197	0.8081	0.3759	0.4041	0.3289	1.0618	0.4041	0.3101	0.3477	0.3477	0.4229	0.3195	0.3571	0.3947	1.1934	0.4135	0.4229	0.2819	0.3101	0.6202	0.2819	610.115	2.0673	71.5848	0.9585
R98-B12	216.19	0.1896	6.9939	0.2267	0.6106	0.1989	0.2914	0.4024	0.1619	0.3562	0.1989	0.3099	0.1665	0.1434	0.1758	1.0454	0.6661	0.8187	0.2082	0.1758	0.1711	0.3932	0.2498	24.1086	2.8216	0.7863	0.2082	0.1711	0.1896	0.4672	0.1804	0.1758	0.1619	0.1711	0.2822	0.1758	0.1665	0.2359	1.1055	0.1989	0.1711	0.1619	0.1573	0.4626	0.1619	466.046	1.8641	56.3119	0.9344
R98-C01	110.1	0.2543	2.8337	0.3179	0.9718	0.2997	0.2906	0.3633	0.2816	0.2997	0.3088	0.6358	0.2906	0.2997	0.3633	1.3624	0.4632	2.7429	0.3724	0.3088	0.2452	0.881	0.4087	22.7333	2.4068	0.7266	0.327	0.2816	0.2997	4.9681	0.4995	0.2725	0.3996	0.327	0.772	0.3633	0.336	0.3542	1.0081	0.3451	0.445	0.3451	0.3179	1.9436	0.3542	424.43	1.3624	41.5157	0.8537
R98-C02	148.68	0.2489	5.2664	0.2892	1.1703	0.3296	0.3497	0.3632	0.2354	0.2354	0.269	0.6793	0.2489	0.2287	0.2152	1.399	0.4103	2.3003	0.269	0.1951	0.2085	0.6726	0.2892	18.207	2.1388	0.6659	0.3161	0.2623	0.2085	4.5871	0.3565	0.2085	0.2758	0.2758	0.5313	0.269	0.2489	0.269	0.8811	0.2623	0.2758	0.2556	0.2421	1.1703	0.269	382.757	1.1636	40.3486	0.7129
R98-C03	107.79	0.2876	8.0343	0.3897	1.3081	0.3989	0.3618	0.4824	0.334	0.2783	0.3247	0.6773	0.3247	0.3525	0.334	1.8091	0.501	2.0781	0.3525	0.3711	0.2876	0.668	0.3525	19.2228	2.1153	0.6401	0.334	0.3525	0.2598	4.2212	0.3989	0.3711	0.3618	0.3804	0.5845	0.3804	0.3711	0.4082	1.1318	0.3525	0.3711	0.334	0.3525	0.8814	0.3062	425.556	1.2061	42.5649	0.5659
R98-C04	119.94	0.2418	4.5106	0.3502	0.7837	0.2751	0.3252	0.5169	0.3085	0.2501	0.3669	0.5003	0.2918	0.2918	0.3418	1.2173	0.3835	2.8265	0.3168	0.3002	0.2918	0.5169	0.3168	22.3198	2.5847	0.8754	0.3168	0.2501	0.2668	4.3522	0.5086	0.2751	0.3002	0.2751	0.4085	0.3085	0.2835	0.3002	0.9838	0.3418	0.2835	0.2501	0.2835	0.8421	0.2418	510.362	1.209	53.4941	0.6587
R98-C05	123.05	0.3007	6.6152	0.4388	1.4222	0.4307	0.382	0.5039	0.3738	0.2926	0.3332	0.6339	0.2844	0.2926	0.382	2.048	0.4551	1.8448	0.2844	0.2844	0.2276	0.9508	0.2844	26.7698	2.7062	0.8371	0.3413	0.2926	0.3088	3.4295	0.3738	0.2357	0.3007	0.2601	0.6583	0.3495	0.3738	0.3495	1.2434	0.3251	0.3332	0.2844	0.2682	1.5766	0.3495	465.586	1.3084	48.8179	0.5851
R98-C06	106.1	0.377	8.0398	0.4995	1.2064	0.311	0.3864	0.5278	0.311	0.2922	0.3016	0.6126	0.3205	0.3487	0.377	1.7814	0.509	1.7814	0.3582	0.3676	0.3205	0.6221	0.3299	19.8309	2.3658	0.5938	0.2733	0.3016	0.3016	2.4317	0.3393	0.2639	0.4147	0.2451	0.5561	0.2922	0.2922	0.377	1.0368	0.3487	0.3016	0.3582	0.3676	0.9143	0.3016	452.464	1.2253	46.4764	0.9237
R98-C07	104.01	0.3173	4.8651	0.3942	0.8653	0.3269	0.2788	0.5769	0.3557	0.4904	0.4134	0.4423	0.2981	0.2692	0.2884	1.1922	0.798	1.0096	0.4038	0.3173	0.2788	0.6538	0.3173	19.1335	2.1537	0.7692	0.3557	0.3365	0.3269	0.5192	0.3654	0.3461	0.3365	0.4134	0.5	0.2981	0.3461	0.3461	1.2115	0.2981	0.375	0.3365	0.3269	0.8461	0.3269	483.269	1.1922	48.2855	0.6923
R98-C08	112.17	0.3299	7.9168	0.419	0.8915	0.321	0.4725	0.4725	0.2496	0.2675	0.321	0.7132	0.2942	0.2764	0.3655	1.4175	0.4993	2.1932	0.4279	0.3566	0.3031	0.8559	0.3834	19.9703	2.2199	0.8737	0.312	0.3299	0.2764	3.156	0.4101	0.312	0.3031	0.2764	0.526	0.3566	0.3834	0.3477	1.0698	0.2942	0.3477	0.2853	0.3566	1.0163	0.3299	431.501	1.0788	41.5453	0.5706
R98-C09	166.99	0.1976	2.7966	0.2455	1.3594	0.2635	0.2036	0.3413	0.1797	0.1916	0.2635	0.4551	0.1976	0.1976	0.2276	2.0301	0.2994	0.9761	0.1976	0.1797	0.1916	0.4372	0.2216	24.3973	2.9583	0.8144	0.2395	0.2096	0.2276	2.0601	0.2755	0.1856	0.2455	0.2695	0.3833	0.2395	0.2575	0.2815	1.0839	0.2156	0.2096	0.2156	0.1677	0.6468	0.2336	483.347	1.6828	55.3521	0.8564
R98-C10	166.53	0.2042	6.1249	0.2642	0.9488	0.2342	0.2342	0.4083	0.2162	0.3543	0.2222	0.4023	0.1861	0.1801	0.2042	1.6273	0.7506	0.9788	0.2462	0.2222	0.1741	0.4083	0.2702	23.1724	3.0865	0.9488	0.2522	0.2642	0.2282	0.5584	0.2162	0.2342	0.1861	0.2522	0.2762	0.2522	0.2282	0.2582	1.1169	0.2462	0.2702	0.2582	0.2042	0.5404	0.2462	473.74	1.5853	55.4661	0.7206
R98-C11	169	0.1834	3.8816	0.2663	1.0355	0.2485	0.2426	0.3905	0.2308	0.3964	0.2367	0.4793	0.1953	0.1953	0.2249	1.6331	0.6213	0.9408	0.2071	0.1953	0.2071	0.426	0.2781	23.5501	2.716	0.7041	0.2426	0.3077	0.2012	0.568	0.2308	0.2426	0.2189	0.2604	0.3254	0.2485	0.213	0.2722	0.9763	0.2426	0.2426	0.2426	0.2071	0.645	0.2959	471.085	1.5917	53.4493	0.7988
R98-C12	206.86	0.1354	5.8059	0.2175	0.4302	0.1789	0.2417	0.3481	0.1644	0.1595	0.2175	0.2949	0.1595	0.1354	0.174	0.6526	0.203	0.7203	0.1692	0.2224	0.1595	0.2755	0.1789	19.9942	2.3881	0.759	0.1934	0.1692	0.1547	1.107	0.1789	0.1595	0.1305	0.1885	0.2127	0.1499	0.174	0.203	0.6961	0.174	0.1644	0.1499	0.1547	0.3094	0.1885	440.825	1.7887	53.3453	0.759
R98-D01	102.6	0.2924	14.0149	0.5165	1.7056	0.5068	0.4581	0.6432	0.3021	0.3509	0.4191	0.9454	0.3216	0.3801	0.3509	3.0798	0.6432	3.3234	0.4093	0.3411	0.3119	1.4327	0.4971	26.7531	3.1967	0.8187	0.3996	0.3898	0.3411	3.9179	0.4776	0.3509	0.4873	0.3314	1.1306	0.4971	0.5263	0.4873	1.3742	0.4191	0.4483	0.3898	0.3216	2.2514	0.4191	454.774	1.15	45.4852	0.8089
R98-D02	116.7	0.377	45.3048	1.1226	2.725	0.4285	0.377	0.4884	0.2999	0.6598	0.5399	0.8312	0.3856	0.3599	0.4542	4.2417	1.5167	2.108	0.4285	0.3171	0.2999	1.2682	0.437	25.3559	3.162	0.9426	0.437	0.3942	0.497	0.8055	0.4542	0.3428	0.4799	0.2913	1.3882	0.4456	0.4456	0.4199	1.6881	0.4113	0.3942	0.3256	0.3342	2.6221	0.3428	407.931	1.1397	42.1685	0.7198
R98-D03	101.58	0.4036	3.9771	0.4135	1.3093	0.4135	0.3938	0.4922	0.3839	0.3052	0.4627	0.7875	0.3642	0.315	0.4036	1.8212	0.6104	3.544	0.5021	0.9254	0.3741	0.9451	0.4725	20.939	2.4217	0.8171	0.3446	0.3446	0.4528	6.0346	0.5513	0.3741	0.4824	0.3839	0.7679	0.4233	0.443	0.4824	1.2502	0.3544	0.3347	0.3544	0.4233	1.7228	0.3741	456.188	1.1715	45.2841	0.7186
R98-D04	105.41	0.332	14.3248	0.6546	2.0301	0.4838	0.4554	0.6166	0.4079	0.3131	0.4079	0.7305	0.3036	0.3036	0.3225	3.178	0.5882	4.0698	0.4269	0.3225	0.351	1.4135	0.4174	22.5307	2.7321	0.7779	0.389	0.3415	0.3131	7.5608	0.4743	0.3131	0.4648	0.332	1.2048	0.4079	0.4648	0.4174	1.385	0.389	0.5312	0.37	0.3225	2.2483	0.4459	425.161	0.9487	41.4754	0.5692
R98-D05	115.39	0.2687	5.8411	0.3813	1.1006	0.3987	0.39	0.416	0.2687	0.338	0.286	0.624	0.312	0.234	0.3727	1.6033	0.468	3.8912	0.2773	0.26	0.2513	0.7886	0.39	21.5012	2.5566	0.7626	0.338	0.2513	0.3293	5.0092	0.4507	0.2947	0.3293	0.2947	0.702	0.3293	0.3207	0.3467	0.9446	0.3293	0.312	0.338	0.2687	1.118	0.3553	463.104	1.17	46.5297	0.6413
R98-D06	101.62	0.3346	6.2982	0.4625	1.2498	0.3149	0.2952	0.6495	0.2755	0.6593	0.374	0.5216	0.3838	0.3051	0.3149	1.5253	0.7676	0.9447	0.374	0.3641	0.3247	0.8857	0.374	20.5379	2.4799	0.925	0.4428	0.3346	0.3641	0.5609	0.3543	0.3838	0.4527	0.3936	0.5019	0.3641	0.3838	0.4133	1.2793	0.4133	0.4724	0.3641	0.3444	1.545	0.374	470.08	1.0727	45.6322	0.7381
R98-D07	102.07	0.3821	7.5338	0.4213	1.1168	0.3331	0.3919	0.578	0.3625	0.3233	0.3135	0.6074	0.3821	0.2547	0.3233	1.1266	0.3821	1.8026	0.3135	0.3723	0.2939	0.7935	0.4409	23.6301	2.557	0.8621	0.3331	0.3821	0.3331	3.713	0.4017	0.3135	0.4311	0.3429	0.627	0.3429	0.3331	0.4703	1.205	0.3135	0.3821	0.3037	0.3135	1.205	0.3723	496.76	1.0875	50.3168	0.7152
R98-D08	179.26	0.1729	6.4154	0.2845	0.8089	0.212	0.3236	0.4798	0.1953	0.2622	0.2343	0.3012	0.1897	0.2008	0.2008	1.032	0.2734	1.4504	0.2399	0.1897	0.1618	0.4184	0.2231	21.2545	2.8897	0.7196	0.2399	0.1785	0.1953	2.5159	0.2734	0.212	0.2287	0.2008	0.3124	0.1953	0.2231	0.2399	0.9818	0.2176	0.212	0.2176	0.1897	0.6248	0.1953	462.577	1.523	55.3843	0.7531
R98-D09	208.65	0.163	3.9636	0.2061	0.6087	0.2061	0.1869	0.5032	0.1677	0.2013	0.1965	0.3499	0.1917	0.1534	0.1917	0.9442	0.2588	0.4745	0.1725	0.1773	0.1677	0.3403	0.2253	27.4097	3.3262	0.9106	0.2205	0.1486	0.1582	0.8291	0.1821	0.1677	0.2109	0.1821	0.163	0.1965	0.1438	0.2157	1.2126	0.163	0.1821	0.1534	0.1534	0.4984	0.1486	522.145	2.0848	64.9273	0.9921
R98-D10	168.01	0.1964	3.6129	0.3095	0.744	0.2619	0.2857	0.4762	0.2559	0.2916	0.2381	0.4583	0.2678	0.1845	0.2797	1.1487	1.0952	0.7083	0.2262	0.2381	0.1905	0.5535	0.2559	28.2364	3.0593	0.8928	0.3274	0.2916	0.244	0.3095	0.2559	0.2202	0.25	0.244	0.4821	0.25	0.2619	0.3036	1.4225	0.2381	0.25	0.2202	0.2321	1.1071	0.2738	472.335	1.5713	55.4432	0.7916
R98-D11	178.34	0.2187	12.5212	0.4262	0.6729	0.2019	0.2523	0.6617	0.2187	0.3196	0.2075	0.3196	0.2187	0.1738	0.2299	0.9701	0.2467	0.8131	0.2243	0.2187	0.185	0.4318	0.2355	22.5864	2.871	0.7682	0.2019	0.1963	0.2075	1.0149	0.1907	0.2075	0.1682	0.2299	0.2467	0.2355	0.2131	0.2635	0.9589	0.2523	0.2804	0.1907	0.185	0.5215	0.2131	486.152	1.4859	55.967	0.757
R98-D12	215.58	0.1577	5.1165	0.2876	0.7839	0.2319	0.2598	0.4453	0.1716	0.2644	0.2227	0.3062	0.1577	0.167	0.1948	1.3499	0.2505	0.5335	0.1855	0.1855	0.1809	0.334	0.2319	23.7409	2.9131	0.9463	0.2505	0.2087	0.1902	0.9277	0.2087	0.1624	0.2134	0.1902	0.2876	0.2041	0.1809	0.2459	0.9556	0.2366	0.1855	0.1763	0.1577	0.5381	0.167	469.693	1.874	57.8123	0.8628
R98-E01	180.43	0.1607	3.8906	0.2383	0.6872	0.2106	0.2217	0.4157	0.2217	0.2937	0.3104	0.3214	0.2161	0.2161	0.2328	0.8868	0.7371	0.8202	0.2328	0.2106	0.1884	0.4711	0.2771	22.252	2.5882	0.7925	0.2272	0.2494	0.1995	0.5653	0.2217	0.1607	0.194	0.1995	0.3824	0.2161	0.2383	0.2716	0.9699	0.2106	0.2161	0.2328	0.194	0.6041	0.2383	464.487	1.4354	55.9652	0.8701
R98-E02	195.62	0.1789	5.1325	0.2812	0.9764	0.2147	0.2658	0.2965	0.1738	0.1687	0.2352	0.3936	0.1891	0.184	0.2249	1.5541	0.2965	1.5899	0.2198	0.23	0.1943	0.4039	0.1994	22.0637	2.9855	0.6339	0.2505	0.2505	0.1636	3.3944	0.2352	0.1891	0.184	0.2045	0.4396	0.2045	0.2096	0.2812	1.0275	0.2249	0.2352	0.1891	0.1738	0.6288	0.2147	444.423	1.5643	52.2301	0.7975
R98-E03	139.42	0.2224	5.2145	0.3084	0.9826	0.2295	0.3084	0.4734	0.1865	0.1865	0.251	0.5738	0.2654	0.3515	0.3299	1.5062	0.3443	1.5421	0.3084	0.2439	0.3156	0.4662	0.2797	18.5268	2.41	0.6384	0.2367	0.2367	0.251	1.7716	0.3012	0.2224	0.3299	0.2869	0.416	0.2941	0.2654	0.3299	0.9037	0.2941	0.2869	0.2439	0.2367	0.581	0.2726	447.449	1.413	50.3804	0.8464
R98-E04	136.4	0.2126	5.9749	0.3226	1.085	0.2859	0.2786	0.4692	0.2346	0.2199	0.2859	0.5572	0.2493	0.2346	0.2419	1.6055	0.3739	0.9017	0.2639	0.2493	0.2053	0.4692	0.2493	19.0242	2.2653	0.7331	0.3372	0.2786	0.2932	1.3416	0.3079	0.2273	0.2713	0.2639	0.3739	0.2493	0.2419	0.2493	0.8284	0.2566	0.2493	0.2199	0.2566	0.7184	0.2346	460.159	1.2536	49.4997	0.7184
R98-E05	166.83	0.1798	4.004	0.2398	0.8272	0.2158	0.2338	0.3656	0.2098	0.2937	0.2577	0.3297	0.2218	0.2577	0.2218	1.2048	0.6114	0.5574	0.2278	0.2098	0.2038	0.4076	0.2697	17.9702	2.2178	0.7073	0.2218	0.2338	0.1978	0.3656	0.2158	0.2577	0.2458	0.2338	0.3057	0.2338	0.2158	0.2518	1.0729	0.2637	0.2518	0.2098	0.2338	0.6114	0.2458	442.985	1.3966	50.7757	0.7912
R98-E06	147.56	0.2711	11.3443	0.4134	0.7725	0.2778	0.2507	0.454	0.2575	0.2982	0.2711	0.3998	0.2033	0.2304	0.2304	1.335	0.3456	0.698	0.2643	0.2236	0.2372	0.4473	0.2914	20.5674	2.731	0.8403	0.2914	0.2507	0.2507	1.3621	0.2236	0.2575	0.2711	0.2711	0.3117	0.2711	0.2372	0.3117	1.1249	0.2101	0.2643	0.2304	0.2169	0.7861	0.1965	455.654	1.1995	49.7887	0.6709
R98-E07	143.14	0.2026	4.0102	0.3004	0.6917	0.2655	0.2515	0.4541	0.2026	0.2236	0.2585	0.2655	0.2166	0.2236	0.2236	1.0689	0.3144	0.3074	0.1956	0.2026	0.2096	0.2515	0.2306	20.4421	2.3195	0.7406	0.2445	0.2166	0.1956	0.2725	0.2375	0.2026	0.2375	0.2445	0.2375	0.2445	0.2375	0.2515	0.7825	0.2864	0.2306	0.1816	0.2445	0.3284	0.2166	484.065	1.3554	54.857	0.7825
R98-E08	124.87	0.2803	10.6672	0.4244	0.7528	0.2643	0.3203	0.4565	0.2242	0.3844	0.2643	0.4244	0.2563	0.2563	0.2963	1.3614	0.5606	0.7928	0.2803	0.3123	0.2242	0.4885	0.2803	15.296	2.0662	0.6567	0.2963	0.3043	0.2963	0.5526	0.3444	0.3283	0.3043	0.3283	0.4004	0.3203	0.2963	0.4164	0.921	0.2963	0.2723	0.2803	0.2242	0.5286	0.3524	429.979	1.1772	44.3105	0.6086
R98-E09	190.39	0.1733	4.3595	0.2364	1.124	0.2364	0.2574	0.3992	0.1576	0.1996	0.2679	0.3939	0.1996	0.2048	0.2153	1.4602	0.3519	0.9034	0.1996	0.2101	0.1733	0.4149	0.2259	25.1852	2.8941	0.7196	0.2364	0.2101	0.2153	1.749	0.2731	0.1733	0.2259	0.1943	0.3782	0.2206	0.2048	0.3256	1.0452	0.2311	0.2048	0.1891	0.1576	0.5725	0.2153	477.415	1.7228	57.4925	0.8351
R98-E10	198.46	0.2016	4.55	0.2217	0.8969	0.2469	0.2519	0.3981	0.1814	0.1612	0.1814	0.2469	0.1764	0.1864	0.2167	1.3353	0.2318	0.8163	0.1814	0.1713	0.1713	0.3527	0.257	22.4176	2.6151	0.7105	0.2368	0.1612	0.1713	1.4814	0.1915	0.1663	0.1814	0.1562	0.2872	0.1915	0.2469	0.2368	0.8566	0.2419	0.1915	0.1864	0.1461	0.5845	0.1965	460.943	1.6779	55.986	0.8969
R98-E11	164.66	0.1883	2.9272	0.2854	0.9595	0.2733	0.2368	0.3462	0.1883	0.3037	0.2186	0.2611	0.17	0.1822	0.2247	1.2328	0.4858	0.4858	0.2065	0.1822	0.2368	0.3097	0.2126	21.547	2.8543	0.7652	0.2672	0.2308	0.2186	0.3097	0.1943	0.2126	0.1822	0.2126	0.3644	0.2308	0.2065	0.2976	1.0081	0.1943	0.3097	0.1943	0.2186	0.4494	0.2065	469.637	1.5668	56.1388	1.0567
R98-E12	210.23	0.1332	3.7484	0.2045	0.7516	0.157	0.1998	0.333	0.1332	0.2188	0.157	0.176	0.1903	0.157	0.2045	1.0798	0.3139	0.3568	0.1522	0.1855	0.1712	0.2711	0.2141	23.7317	2.9397	0.7373	0.2759	0.2141	0.1379	0.3139	0.157	0.1284	0.1427	0.1855	0.2283	0.157	0.157	0.2474	0.9609	0.1617	0.1427	0.1427	0.1475	0.4757	0.1475	502.575	2.0026	61.6482	0.9466
R98-F01	112.39	0.3203	13.489	0.5339	1.2635	0.3292	0.3648	0.4894	0.3025	0.5161	0.3381	0.6584	0.2847	0.2669	0.3559	2.2244	1.3347	1.4503	0.3025	0.3292	0.3737	0.7919	0.3381	19.5038	2.4113	0.5517	0.3114	0.3203	0.3559	0.9165	0.2936	0.3648	0.3559	0.3203	0.6851	0.3292	0.3648	0.4004	1.0588	0.3559	0.3648	0.3203	0.3648	1.2368	0.3114	430.553	1.0143	44.204	0.5695
R98-F02	182.37	0.181	2.9281	0.2303	0.6525	0.181	0.2193	0.3619	0.159	0.2851	0.2248	0.3455	0.2248	0.1974	0.2029	1.0583	0.6635	0.8335	0.2029	0.1755	0.1974	0.4058	0.2413	20.7929	2.484	0.6745	0.2303	0.2961	0.1755	0.6854	0.2193	0.1974	0.2029	0.2358	0.2961	0.1864	0.2029	0.2687	0.9541	0.1974	0.2248	0.1864	0.1755	0.5703	0.181	437.901	1.4366	51.7026	0.7567
R98-F03	135.87	0.3165	12.4164	0.4858	1.0157	0.2723	0.2944	0.4931	0.2429	0.2355	0.2944	0.4637	0.2797	0.2355	0.2576	1.6634	0.3386	1.7075	0.2797	0.2208	0.2355	0.4931	0.3606	18.1131	2.3037	0.6035	0.2429	0.2576	0.2429	2.1859	0.3238	0.3165	0.2576	0.2576	0.5152	0.287	0.265	0.3091	0.92	0.265	0.2502	0.2282	0.2208	0.6992	0.2576	434.611	1.0819	45.4336	0.5299
R98-F04	132.45	0.2492	5.1568	0.2718	1.1174	0.3096	0.3096	0.521	0.2794	0.2643	0.2643	0.3926	0.2945	0.2416	0.302	1.4798	0.3775	1.057	0.2643	0.2869	0.2265	0.5965	0.3247	22.0843	2.5746	0.7475	0.3096	0.2492	0.2718	1.729	0.2869	0.2643	0.2718	0.2492	0.4606	0.3096	0.2718	0.3473	0.9211	0.2416	0.2794	0.2416	0.2492	0.9211	0.2794	489.675	1.3741	54.1877	0.7701
R98-F05	114.32	0.3062	3.0616	0.3062	1.0584	0.3237	0.4024	0.3849	0.2799	0.3149	0.3586	0.3936	0.2887	0.2537	0.3149	1.5483	0.4286	1.1634	0.3324	0.3062	0.2799	0.5861	0.3324	22.0522	2.7904	0.9797	0.3237	0.3062	0.3062	1.592	0.3149	0.2624	0.2974	0.3237	0.4724	0.2974	0.3149	0.3761	1.0322	0.2712	0.3062	0.2537	0.2887	0.8485	0.2887	530.399	1.3209	54.9425	0.761
R98-F06	133.07	0.2254	10.2649	0.3832	0.6538	0.278	0.3006	0.4734	0.1954	0.3006	0.2856	0.3457	0.2405	0.233	0.2705	1.1873	0.5035	0.5711	0.248	0.2254	0.2705	0.3682	0.2931	14.5633	1.7659	0.5711	0.3156	0.233	0.2405	0.3231	0.233	0.3231	0.2254	0.3081	0.2705	0.278	0.2705	0.3306	0.8867	0.2555	0.2555	0.263	0.233	0.4584	0.2555	398.191	1.0445	42.0817	0.6162
R98-F07	155.61	0.2699	6.5226	0.3213	0.7454	0.2185	0.3085	0.4627	0.2121	0.3984	0.2313	0.2956	0.2056	0.2249	0.2185	1.2788	0.7326	0.8161	0.2506	0.2185	0.2313	0.4563	0.257	23.4555	2.5062	0.8547	0.2699	0.2442	0.2249	0.6298	0.3213	0.2249	0.2056	0.2892	0.3085	0.2635	0.2828	0.3085	1.0924	0.2892	0.2185	0.2121	0.2378	0.5912	0.257	492.469	1.6001	54.1661	0.739
R98-F08	103.01	0.233	3.4364	0.3786	0.8445	0.3398	0.3689	0.563	0.3106	0.4951	0.3398	0.4465	0.2912	0.3398	0.3786	1.5241	1.0775	1.2426	0.3495	0.3009	0.3106	0.6504	0.3883	21.9291	2.5725	0.8154	0.2815	0.4465	0.3301	0.6989	0.3398	0.2912	0.3592	0.3495	0.3786	0.2912	0.3786	0.3495	1.2717	0.3203	0.4854	0.3203	0.3592	0.7863	0.2815	525.853	1.1455	53.6628	0.7863
R98-F09	125.38	0.2074	3.8205	0.3589	1.4118	0.2792	0.3031	0.4387	0.2712	0.5344	0.319	0.4307	0.2792	0.2473	0.2473	1.8584	1.1406	0.9491	0.2473	0.2473	0.2792	0.5503	0.343	25.3718	3.2702	0.9013	0.2951	0.343	0.2473	0.5264	0.3509	0.2552	0.319	0.2632	0.4706	0.3031	0.2712	0.4148	1.4437	0.2712	0.2632	0.2792	0.2074	0.9172	0.2552	504.541	1.5553	56.5023	0.8056
R98-F10	155.18	0.1869	3.338	0.2835	0.9473	0.2191	0.2513	0.3286	0.1998	0.3093	0.3029	0.2513	0.2642	0.2062	0.232	1.2437	0.5349	0.5477	0.2255	0.2578	0.2127	0.2771	0.2513	21.8388	2.8676	0.9151	0.2449	0.2255	0.1933	0.4446	0.2449	0.2191	0.2062	0.2384	0.2642	0.2062	0.1869	0.3158	0.9537	0.2255	0.2191	0.2127	0.2384	0.4446	0.1933	477.495	1.553	54.4455	0.8442
R98-F11	120.9	0.2978	7.9738	0.4136	0.7527	0.2978	0.2812	0.5046	0.2399	0.4715	0.2978	0.4053	0.2895	0.2647	0.2978	1.3152	0.9926	1.0753	0.3226	0.2481	0.273	0.5873	0.3143	19.7361	2.2003	0.7858	0.3061	0.3061	0.2895	0.7279	0.2978	0.2647	0.273	0.3143	0.5128	0.3309	0.3061	0.3474	0.9843	0.364	0.3143	0.3722	0.2895	0.8023	0.3061	440.894	1.2573	45.3864	0.6617
R98-F12	126.37	0.277	4.3604	0.2928	0.9338	0.3007	0.3482	0.4748	0.2611	0.3799	0.277	0.2849	0.2532	0.2691	0.2453	1.2345	0.5698	0.6173	0.3324	0.2691	0.2137	0.3878	0.3482	21.976	2.651	0.8151	0.2374	0.2137	0.2532	0.4511	0.2453	0.2611	0.2374	0.277	0.2928	0.2453	0.3165	0.3245	1.2266	0.2691	0.277	0.2374	0.2532	0.4827	0.2532	501.625	1.4324	54.746	0.728
R98-G01	122.98	0.4147	26.9965	0.7074	1.4555	0.3497	0.4635	0.5367	0.2765	0.4391	0.3497	0.3659	0.2765	0.2927	0.374	2.3663	0.8538	1.0734	0.3253	0.2521	0.3253	0.5285	0.309	16.6208	2.3093	0.7481	0.2765	0.3009	0.2439	0.5855	0.2765	0.2927	0.2765	0.2602	0.4228	0.2765	0.3171	0.3659	0.7644	0.309	0.2521	0.3578	0.2927	0.6587	0.2602	396.686	1.2766	41.1047	0.7237
R98-G02	113.76	0.2725	7.7271	0.5538	1.0637	0.3077	0.3516	0.5626	0.3253	0.4395	0.3956	0.3253	0.2637	0.2549	0.2725	1.4944	0.8	0.6945	0.3253	0.2989	0.2901	0.5099	0.3165	19.1287	2.3296	0.7296	0.3165	0.2813	0.2813	0.4659	0.2901	0.2725	0.3253	0.378	0.422	0.3253	0.2989	0.378	1.0197	0.3077	0.3077	0.2637	0.2637	0.5802	0.2901	491.184	1.2131	50.459	0.6241
R98-G03	129.4	0.3168	3.1916	0.3478	0.9737	0.3014	0.3478	0.4791	0.3091	0.4096	0.3323	0.3632	0.255	0.255	0.3323	1.476	0.4869	0.5178	0.2782	0.2859	0.2782	0.4018	0.2705	19.4819	2.272	0.8192	0.3246	0.2937	0.2705	0.3709	0.3014	0.2859	0.2782	0.34	0.3709	0.2473	0.3091	0.3246	1.0664	0.3632	0.255	0.2627	0.2473	0.5564	0.2396	499.83	1.306	54.8446	0.8655
R98-G04	107.08	0.2615	4.9216	0.3455	1.3635	0.3362	0.3736	0.607	0.3455	0.4016	0.3362	0.4109	0.3082	0.3269	0.3269	2.3254	0.5977	0.7191	0.4016	0.3362	0.3362	0.5136	0.3362	24.9725	2.6896	1.046	0.4203	0.3549	0.3362	0.5323	0.3082	0.3549	0.3175	0.3269	0.3922	0.3175	0.3455	0.3922	1.158	0.4203	0.3175	0.3829	0.3082	0.6724	0.3736	551.393	1.3448	58.9384	0.9059
R98-G05	135.03	0.2666	4.6065	0.3629	1.022	0.3036	0.3333	0.511	0.2296	0.2888	0.2814	0.4147	0.2888	0.2666	0.2592	1.3257	0.3111	1.3553	0.2592	0.2518	0.2518	0.6591	0.3629	23.7213	2.8069	0.948	0.3481	0.274	0.2666	2.0959	0.3259	0.274	0.274	0.2814	0.5036	0.2666	0.2814	0.3407	1.1331	0.3407	0.2888	0.2222	0.2666	0.8221	0.2888	489.075	1.4145	54.4042	0.9702
R98-G06	104.22	0.307	5.6321	0.4318	0.6141	0.355	0.3358	0.6141	0.2974	0.403	0.3454	0.3646	0.3262	0.2687	0.3166	0.8635	0.4797	0.4989	0.307	0.3358	0.3166	0.4318	0.3646	20.9069	2.7057	0.7676	0.355	0.307	0.3646	0.4797	0.3262	0.3262	0.355	0.355	0.3838	0.3454	0.355	0.403	1.1034	0.4222	0.307	0.3742	0.3454	0.6428	0.3262	522.327	1.4392	56.8679	0.7484
R98-G07	130.57	0.2451	5.1082	0.4442	0.8041	0.2757	0.3217	0.5897	0.314	0.3906	0.314	0.3217	0.314	0.2987	0.2987	1.4092	0.582	0.6663	0.314	0.314	0.268	0.5284	0.4289	21.2371	2.8796	1.0262	0.291	0.3063	0.3293	0.5591	0.314	0.268	0.268	0.3217	0.36	0.3523	0.337	0.4059	0.9573	0.337	0.3063	0.2987	0.36	0.5897	0.291	489.035	1.5317	54.0462	0.7199
R98-G08	117.41	0.2555	8.8834	0.4003	0.8773	0.2811	0.4259	0.477	0.2725	0.4173	0.2981	0.3833	0.2896	0.2896	0.2896	1.3457	0.6729	0.8432	0.3237	0.2725	0.2896	0.4344	0.2981	20.0835	2.6488	0.8262	0.2981	0.3237	0.2811	0.6047	0.4173	0.264	0.2725	0.3151	0.4344	0.4344	0.3492	0.3918	0.9795	0.4259	0.3237	0.3151	0.3151	0.6984	0.2555	475.54	1.5075	51.6993	0.724
R98-G09	114.98	0.3479	3.4614	0.3566	0.9132	0.3827	0.374	0.4609	0.3392	0.4609	0.3479	0.4175	0.374	0.3131	0.4088	1.2002	0.7566	0.6523	0.3653	0.4088	0.3305	0.5131	0.4435	21.1595	2.4003	0.9827	0.4348	0.3914	0.374	0.6349	0.4348	0.3131	0.4001	0.3653	0.5044	0.3653	0.3392	0.3392	1.2002	0.3566	0.4175	0.3827	0.3479	0.7305	0.374	516.569	1.4002	55.3296	0.7392
R98-G10	129.43	0.3168	7.6337	0.3786	0.8576	0.3168	0.34	0.564	0.3091	0.4713	0.2936	0.3554	0.3091	0.2163	0.394	1.2826	0.8344	0.8344	0.3091	0.255	0.2395	0.5022	0.2627	19.2078	2.3952	0.7649	0.2859	0.2627	0.255	0.7031	0.2472	0.2627	0.2627	0.3013	0.3322	0.2859	0.3013	0.3091	1.074	0.3013	0.2627	0.2781	0.2395	0.6876	0.2936	468.714	1.159	48.5372	0.6645
R98-G11	151.68	0.211	3.6392	0.2637	0.9164	0.2571	0.3165	0.4351	0.2176	0.356	0.3033	0.3626	0.2373	0.2176	0.2505	1.3054	0.7318	0.6988	0.2307	0.2637	0.2176	0.4088	0.3165	24.2022	2.9272	0.7582	0.2439	0.3033	0.2176	0.534	0.2307	0.2307	0.3099	0.2373	0.2967	0.2242	0.2769	0.323	1.2592	0.2901	0.2637	0.2769	0.2307	0.6527	0.2637	519.198	1.5559	60.6012	0.8373
R98-G12	112.02	0.2857	8.8105	0.4999	0.6427	0.366	0.4106	0.4642	0.2857	0.3571	0.3303	0.366	0.3035	0.2946	0.366	1.089	0.6784	0.7855	0.3035	0.2767	0.3124	0.5267	0.3035	18.5941	2.2674	0.6338	0.3214	0.3303	0.3481	0.607	0.3214	0.2767	0.2857	0.3124	0.4017	0.3481	0.2857	0.3214	0.9641	0.3392	0.4106	0.3303	0.3303	0.5981	0.3749	457.8	1.1247	47.6412	0.6249
R98-H01	166.52	0.2162	5.0743	0.3483	0.7807	0.2402	0.2762	0.3963	0.2222	0.3243	0.2582	0.3843	0.2762	0.2222	0.2822	1.3091	0.7687	0.8948	0.2582	0.2102	0.2102	0.4744	0.2342	22.309	2.7143	0.8287	0.2822	0.2642	0.3063	0.5945	0.2762	0.1982	0.1922	0.2402	0.3603	0.2402	0.2282	0.2702	1.0869	0.2522	0.2222	0.2042	0.2102	0.6666	0.2342	478.74	1.4833	54.8687	0.7206
R98-H02	141.53	0.212	8.7334	0.3816	0.756	0.219	0.3109	0.5299	0.2614	0.2756	0.3109	0.325	0.2332	0.1978	0.2685	0.9963	0.4522	0.5158	0.2332	0.212	0.219	0.4098	0.2756	20.9361	2.4165	0.8338	0.2473	0.2756	0.2544	0.4169	0.2614	0.2473	0.2897	0.2685	0.2826	0.2544	0.2897	0.3462	1.0457	0.2614	0.2685	0.2756	0.2473	0.4734	0.2402	495.018	1.505	55.8201	0.7278
R98-H03	143.51	0.2369	7.0238	0.3902	0.7177	0.2578	0.2996	0.5087	0.2787	0.2718	0.2648	0.3623	0.2299	0.209	0.3484	1.0243	0.3275	0.8083	0.2648	0.216	0.2718	0.5784	0.2857	23.3849	2.5085	0.8989	0.2996	0.2718	0.2578	1.526	0.2996	0.3066	0.2787	0.2787	0.4599	0.2787	0.2996	0.3693	1.0382	0.3693	0.3066	0.2718	0.2718	0.6898	0.2369	495.097	1.4912	56.2674	0.864
R98-H04	145.38	0.227	5.3652	0.3095	1.073	0.2614	0.2683	0.4884	0.2201	0.282	0.2958	0.337	0.2132	0.227	0.3027	1.809	0.6535	0.8048	0.2889	0.227	0.1995	0.399	0.3646	23.5383	2.8339	1.1693	0.2683	0.3095	0.2407	0.5709	0.2339	0.2614	0.227	0.2545	0.4333	0.2545	0.2339	0.282	1.0662	0.2751	0.2683	0.2064	0.227	0.6397	0.2407	509.836	1.472	59.1346	0.7085
R98-H05	138.42	0.2745	4.8114	0.3395	0.9608	0.3612	0.3612	0.5852	0.2745	0.4118	0.2384	0.3901	0.2601	0.3106	0.289	1.3726	1.8061	0.708	0.289	0.4262	0.2529	0.4768	0.3395	24.0932	2.9548	0.8669	0.3106	0.4262	0.2817	0.4768	0.2817	0.2529	0.2601	0.2601	0.3973	0.3106	0.3251	0.3251	1.5677	0.2962	0.2962	0.2601	0.2673	0.7441	0.289	496.716	1.5027	56.6966	0.7586
R98-H06	59.7	0.536	44.5419	1.5076	1.3066	0.536	0.6701	1.0721	0.536	0.7538	0.5695	0.5695	0.4355	0.5193	0.6533	1.6919	1.1558	1.2731	0.6533	0.4858	0.4858	0.8878	0.5695	21.3915	2.8477	1.0218	0.5025	0.603	0.6198	1.0051	0.6198	0.5193	0.5193	0.5025	0.6701	0.536	0.6533	0.6533	1.2228	0.7538	0.6366	0.7036	0.5863	1.4574	0.603	479.541	1.1893	45.0612	0.8041
R98-H07	140.72	0.2985	9.8779	0.398	0.7106	0.3056	0.3553	0.6751	0.2914	0.3695	0.334	0.2843	0.3056	0.2558	0.2985	0.9594	0.5188	0.5472	0.2914	0.3553	0.3269	0.3909	0.3837	20.6796	2.7218	0.6964	0.2985	0.2771	0.2843	0.5401	0.3056	0.3056	0.3056	0.3127	0.3269	0.2416	0.3056	0.2985	1.0446	0.3127	0.2843	0.334	0.3127	0.4903	0.3198	481.061	1.3289	52.5021	0.9238
R98-H08	168.49	0.2137	7.5078	0.3264	0.9615	0.2908	0.2849	0.5282	0.1781	0.3324	0.2789	0.3502	0.2077	0.2196	0.2611	1.6143	0.7478	0.8428	0.2374	0.2255	0.1781	0.6469	0.2493	22.019	2.469	0.7656	0.2493	0.2315	0.2255	0.5401	0.2196	0.1959	0.2374	0.2137	0.3442	0.2433	0.2493	0.2671	0.9852	0.2552	0.2315	0.2374	0.2137	0.6172	0.2137	457.075	1.4482	51.7832	0.7241
R98-H09	171.09	0.2221	5.2076	0.263	0.8416	0.2922	0.2572	0.4968	0.1987	0.3565	0.2163	0.3507	0.2104	0.2046	0.2747	1.4144	0.7131	0.6838	0.2396	0.2513	0.1695	0.526	0.2689	24.5127	2.9165	0.7014	0.2455	0.2279	0.2279	0.4384	0.1987	0.2046	0.2221	0.2279	0.3858	0.2163	0.2221	0.2864	1.204	0.2513	0.2279	0.263	0.1929	0.7773	0.2104	491.476	1.8762	56.308	0.865
R98-H10	154.88	0.2324	9.8527	0.3938	0.6521	0.2905	0.3164	0.5811	0.1937	0.2324	0.2647	0.2389	0.2841	0.1872	0.2389	1.0524	0.3874	0.3809	0.2131	0.2518	0.2389	0.3357	0.3099	20.0347	2.5374	0.7038	0.3099	0.2131	0.2389	0.2776	0.2002	0.2066	0.2131	0.2195	0.2389	0.1937	0.2712	0.2518	0.8975	0.2583	0.226	0.2131	0.2518	0.3228	0.2002	487.928	1.556	54.5449	0.7942
R98-H11(WT)	113.8	0.2812	10.9135	0.4745	0.6063	0.3778	0.3603	0.5712	0.3251	0.3515	0.29	0.2988	0.3603	0.2372	0.3603	0.826	0.4394	0.4657	0.2812	0.3778	0.3515	0.3339	0.2988	20.9922	2.5394	0.9051	0.3339	0.3339	0.3515	0.4394	0.3075	0.3075	0.3075	0.3251	0.3778	0.3691	0.2812	0.3515	1.1775	0.3251	0.3866	0.3427	0.3691	0.3691	0.3163	532.616	1.5465	57.0629	0.782
R98-H12(pET28)	109.27	0.302	8.3187	0.6223	0.9884	0.4118	0.421	0.6223	0.3569	0.4301	0.3111	0.4667	0.2745	0.3203	0.2837	1.3178	0.6223	0.6223	0.3295	0.3478	0.302	0.421	0.3752	27.5459	3.5416	0.8785	0.3386	0.4027	0.3844	0.4667	0.3386	0.2837	0.3844	0.3478	0.421	0.3295	0.4027	0.4942	1.3178	0.3569	0.3661	0.3111	0.3295	0.7779	0.302	552.007	1.8028	61.8181	0.8968
[truncated: 180 more columns]

## Sheet: M152
Sample Name	Mean Intensity	m/z 102.17	m/z 104.14	m/z 107.08	m/z 108.11	m/z 113.12	m/z 117.17	m/z 118.16	m/z 119.12	m/z 120.11	m/z 122.12	m/z 123.08	m/z 124.11	m/z 127.10	m/z 129.10	m/z 130.10	m/z 131.09	m/z 133.11	m/z 135.11	m/z 136.10	m/z 137.08	m/z 138.10	m/z 139.10	m/z 140.12	m/z 143.10	m/z 144.09	m/z 145.09	m/z 146.09	m/z 146.73	m/z 147.09	m/z 147.76	m/z 148.10	m/z 149.10	m/z 150.12	m/z 151.14	m/z 152.09	m/z 153.09	m/z 155.11	m/z 155.60	m/z 160.11	m/z 161.11	m/z 162.09	m/z 163.10	m/z 164.10	m/z 165.11	m/z 166.10	m/z 169.10	m/z 170.11	m/z 172.07
M152-A01	336.65	0.6624	0.4723	1.105	0.4426	0.4188	3.6744	0.5109	2.3258	1.31	0.9297	1.1466	0.4782	0.4515	0.606	1.2595	0.5406	0.5941	3.5823	1.1882	5.0883	0.603	0.4069	0.3683	0.5228	2.4357	0.7367	41.4342	0.5881	7.9369	0.5763	1.6723	0.5733	0.5703	0.5584	5.1655	0.7396	0.4871	0.4931	1.4971	0.9505	0.7188	0.7188	2.5308	0.5881	0.606	1.8417	0.5228	399.609
M152-A02	436.56	1.5485	0.3802	0.9506	0.3871	0.3894	3.6512	0.4581	1.5874	0.9575	0.7307	0.7605	0.4444	0.3436	0.5016	0.9758	0.3596	0.4329	2.4051	0.82	1.7271	0.4192	0.3321	0.3161	0.3184	1.2896	0.5978	25.467	0.4787	5.3303	0.4054	1.2461	0.4398	0.465	0.378	2.9526	0.4902	0.3344	0.4077	0.6322	0.4673	0.3894	0.5154	1.4545	0.4283	0.4283	0.7078	0.4375	310.353
M152-A03	397.69	2.2706	0.4828	1.0385	0.4602	0.4199	3.7165	0.4476	2.5196	0.8851	0.7443	1.0888	0.4074	0.3495	0.5884	0.9606	0.43	0.5255	3.5656	0.8952	2.8515	0.4652	0.3143	0.4929	0.4099	1.6646	0.6488	29.2366	0.4677	5.8488	0.44	1.3503	0.44	0.4853	0.3822	3.4147	0.5557	0.3898	0.4149	0.8851	0.5406	0.4652	0.5381	1.6822	0.4602	0.43	0.9631	0.4576	338.716
M152-A04	266.51	3.3583	0.5853	1.1369	0.6717	0.7054	5.2119	0.6754	2.5027	0.9043	1.0018	1.1857	0.6416	0.5366	0.7692	1.3283	0.6154	0.7429	4.0374	1.1594	3.5646	0.7017	0.4803	0.5253	0.6679	1.9849	0.7655	32.8921	0.6116	5.936	0.6004	1.4221	0.6641	0.6229	0.5441	3.6472	0.6979	0.6154	0.5216	1.5084	0.9306	0.6116	0.6942	1.9249	0.5366	0.5891	1.5947	0.5403	334.294
M152-A05	498.98	1.3688	0.4128	0.8618	0.3567	0.3748	2.2807	0.4088	1.7355	1.3989	0.6333	0.5652	0.3487	0.3126	0.507	1.1002	0.4569	0.469	2.7256	1.1063	2.8258	0.4509	0.3146	0.2986	0.3247	1.9219	0.6373	24.1974	0.4229	4.6495	0.3567	1.0782	0.4249	0.5391	0.4088	4.7096	0.5832	0.3146	0.3908	1.2185	0.5792	0.477	0.4048	1.4149	0.3888	0.4249	1.0802	0.4429	255.271
M152-A06	490.1	2.9708	0.3612	0.808	0.3877	0.4346	3.0912	0.3673	1.7792	0.9202	0.6713	0.7182	0.3673	0.304	0.5101	0.8774	0.3918	0.455	2.828	0.8121	1.718	0.3897	0.2816	0.2979	0.3428	1.4364	0.5244	23.8237	0.406	4.8868	0.3877	1.1243	0.4795	0.4611	0.3203	2.071	0.4407	0.3305	0.3632	0.757	0.457	0.402	0.4734	1.4262	0.4754	0.4468	0.8121	0.3714	285.209
M152-A07	335.1	0.9639	0.4297	1.0862	0.4417	0.4596	4.9388	0.5371	1.8024	0.5998	0.9878	1.2742	0.4506	0.5401	0.5342	0.9728	0.564	0.5491	2.7783	1.3906	1.0295	0.4118	0.4327	0.5192	0.4566	1.6622	0.7222	35.5205	0.5879	7.4395	0.5312	1.6502	0.573	0.5819	0.4267	0.4805	0.4864	0.6058	0.5282	0.6476	0.5759	0.4625	0.6297	2.2143	0.5401	0.5312	0.9699	0.4327	430.382
M152-A08	451.98	4.1197	0.2655	0.7766	0.3186	0.3872	4.206	0.5	0.8916	0.4093	0.7788	0.9182	0.3208	0.281	0.3274	0.8651	0.3429	0.3496	1.3452	0.6261	1.2058	0.3451	0.3208	0.4292	0.3761	1.0775	0.5443	23.6627	0.4359	5.0865	0.3363	1.2678	0.3872	0.4513	0.3363	2.2656	0.4182	0.3297	0.3828	0.5022	0.3385	0.4668	0.5332	1.2257	0.3097	0.3252	0.4314	0.2699	342.942
M152-A09	455.35	2.2862	0.3382	0.7994	0.3689	0.4678	2.5717	0.6391	1.6119	0.5622	0.7423	0.8213	0.3118	0.3294	0.437	0.9729	0.3799	0.4853	2.6353	0.7972	3.3139	0.4129	0.3558	0.47	0.3755	1.6141	0.5776	25.5233	0.4085	5.0247	0.4019	1.2628	0.3821	0.4195	0.3668	4.5284	0.5798	0.3536	0.4129	0.7642	0.4985	0.47	0.5271	1.3682	0.3909	0.4392	0.9246	0.4326	321.435
M152-A10	416.31	0.8551	0.6149	0.6486	0.3579	0.4059	1.3355	0.6341	2.0658	1.0497	0.8047	0.5309	0.3339	0.3291	0.5212	1.129	0.4276	0.5789	3.1947	1.0617	3.8217	0.5669	0.4011	0.5621	0.4228	1.7799	0.5501	21.5656	0.4804	4.0426	0.418	1.0233	0.5429	0.4756	0.4059	5.4406	0.7158	0.4108	0.3651	1.2202	0.7302	0.5285	0.4828	1.2923	0.4468	0.5717	1.3451	0.4588	229.953
M152-A11	443.66	2.1525	0.3967	0.9151	0.4215	0.3291	2.9504	0.4125	1.8663	0.8588	0.7325	0.8204	0.3584	0.2885	0.5522	0.8317	0.3449	0.453	3.1871	0.9129	2.5425	0.4283	0.3809	0.3764	0.3719	1.7874	0.5815	27.5141	0.4688	5.5808	0.408	1.3321	0.4666	0.5162	0.3854	4.0549	0.568	0.3516	0.3606	0.8542	0.5319	0.4688	0.4869	1.5304	0.4621	0.3742	0.8475	0.4283	342.146
M152-A12	255.54	4.8682	0.4657	0.9979	0.6379	0.6535	6.59	0.6887	4.3712	0.8296	0.9627	1.3031	0.634	0.8375	0.9196	2.4341	0.7435	0.8805	6.77	4.4221	3.6198	0.6418	0.5048	0.5283	0.6653	3.4359	0.8766	33.8072	0.6066	6.5744	0.5831	1.5418	0.6927	1.0135	0.7435	0.8962	1.1036	0.7318	0.5361	2.9115	1.4284	0.857	0.7827	3.5142	0.8061	0.9431	3.6276	0.7435	344.333
M152-B01	416.58	1.7068	0.4057	0.7082	0.4153	0.4897	3.2431	0.4777	1.4523	0.8234	0.7418	0.7082	0.3961	0.2953	0.4777	0.7946	0.3529	0.4753	2.3453	0.8186	1.7404	0.4057	0.3769	0.3409	0.3553	1.1691	0.5065	18.5488	0.3937	3.7568	0.3793	0.8954	0.4153	0.5065	0.3577	2.0068	0.4609	0.3841	0.4153	0.6601	0.4081	0.3937	0.4009	0.9842	0.3913	0.3697	0.761	0.3697	243.076
M152-B02	444.02	1.2702	0.286	0.7409	0.3581	0.3603	1.5337	0.3536	1.2116	0.4437	0.5856	0.5315	0.3311	0.313	0.4302	0.6599	0.3739	0.3919	1.7229	0.6193	1.7724	0.3491	0.2973	0.3378	0.3288	1.1756	0.5225	21.7105	0.5112	4.4705	0.3964	1.2432	0.3896	0.5856	0.4211	2.5607	0.4707	0.3581	0.4459	0.6306	0.4324	0.3896	0.4662	1.2161	0.3896	0.3761	0.8018	0.3401	322.786
M152-B03	199.5	0.8922	0.7218	1.1779	0.7619	0.6867	6.2204	0.7218	0.9975	1.1378	1.1077	1.223	0.787	0.792	0.6767	1.3584	0.7368	0.7318	1.4235	1.0977	3.1528	0.7719	0.6616	0.6266	0.7118	2.0651	1.0326	39.7034	0.9223	7.2229	0.6917	1.8897	0.6115	0.9072	0.802	5.9548	0.8822	0.787	0.7469	1.5188	0.9072	0.9173	1.0225	2.3759	0.787	0.807	1.3985	0.7268	419.851
M152-B04	461.03	2.7655	0.2885	0.6724	0.3666	0.4316	4.8435	0.5336	1.5509	0.4381	0.6117	0.8481	0.41	0.334	0.4533	0.8937	0.4425	0.4707	2.2406	0.77	2.707	0.3969	0.2907	0.4056	0.3948	1.6311	0.577	24.7576	0.4815	4.7112	0.4165	1.0238	0.4034	0.4338	0.3514	3.0215	0.5705	0.4208	0.4425	0.924	0.5466	0.423	0.5227	1.4121	0.3818	0.4468	1.0693	0.3752	301.204
M152-B05	363.94	5.1135	0.4396	1.0579	0.4946	0.5715	5.729	0.5935	1.7256	0.9122	0.7721	1.1128	0.4589	0.4286	0.5138	1.0002	0.4973	0.5798	2.7367	0.926	2.4208	0.4946	0.3902	0.5001	0.5798	1.786	0.7144	32.231	0.5963	6.3555	0.4891	1.5607	0.5688	0.5303	0.5688	3.4374	0.5303	0.4479	0.4973	1.0112	0.6512	0.5386	0.5963	1.7915	0.4809	0.5083	1.0194	0.4891	355.975
M152-B06	488.87	1.8144	0.27	0.6403	0.3334	0.4398	2.8392	0.4214	0.8264	0.3846	0.628	0.6853	0.3539	0.313	0.3293	0.7405	0.3027	0.3846	1.2416	0.5073	1.2232	0.3702	0.2721	0.3396	0.3764	1.1844	0.5482	19.2198	0.3764	3.9663	0.3907	1.0453	0.3436	0.4602	0.3191	1.6896	0.3743	0.2884	0.3846	0.5216	0.3641	0.3723	0.4827	1.17	0.3702	0.3048	0.6791	0.3457	284.852
M152-B07	367.22	2.8266	0.58	0.8741	0.3785	0.5065	4.1936	0.5337	1.495	1.2309	0.9613	0.7843	0.452	0.4112	0.4112	1.446	0.4139	0.4357	2.0423	0.9504	2.4917	0.4629	0.3622	0.4166	0.384	1.6284	0.5582	22.7408	0.5582	4.2317	0.4112	1.1519	0.5228	0.4085	0.4003	3.2814	0.5365	0.4466	0.3731	0.9531	0.6045	0.5038	0.482	1.2145	0.4384	0.4384	0.9994	0.5201	250.152
M152-B08	349.62	2.0193	0.4176	1.0068	0.4834	0.4205	3.5868	0.5177	1.5989	0.695	0.8066	1.1727	0.4977	0.4262	0.5406	1.0469	0.4376	0.5234	2.3597	0.7351	3.2292	0.5263	0.3375	0.3947	0.4176	1.7991	0.7665	33.1675	0.5291	6.4156	0.4605	1.5817	0.552	0.6035	0.4176	5.24	0.7465	0.4319	0.6007	0.9753	0.6779	0.5463	0.5835	1.8534	0.4719	0.5291	0.9038	0.4519	386.389
M152-B09	436.16	1.5957	0.3141	0.9377	0.4517	0.3645	2.3936	0.3554	1.3252	0.7841	0.6901	0.8231	0.3966	0.3668	0.4769	0.9125	0.4196	0.3921	2.0955	0.8437	4.6955	0.4219	0.2912	0.3256	0.4448	1.9649	0.736	30.7109	0.5204	5.8716	0.431	1.5889	0.4815	0.4929	0.3852	7.2702	0.752	0.3989	0.4127	1.2518	0.4494	0.4769	0.5663	1.6897	0.4425	0.4035	1.1303	0.4264	362.941
M152-B10	299.96	1.1401	0.6067	1.0568	0.5601	0.5467	3.2871	0.5801	2.0136	2.0903	0.8434	0.9401	0.5601	0.5467	0.5434	2.7737	0.6901	0.7401	2.797	1.2968	5.1773	0.6234	0.4701	0.6167	0.5834	2.7303	0.7068	30.7038	0.5267	5.5473	0.5167	1.3835	0.6968	0.5434	0.5834	6.7075	0.8934	0.6101	0.4667	2.2403	0.9535	0.7001	0.6701	1.8836	0.5734	0.6567	1.8069	0.7568	247.937
M152-B11	241.35	1.0027	0.5179	1.2057	0.6546	0.6422	4.0853	0.7209	2.0302	0.8328	1.011	1.5537	0.6339	0.5428	0.6629	1.2016	0.5966	0.6174	2.9293	1.1808	3.9113	0.6795	0.5552	0.6381	0.7085	2.3783	0.9405	37.4057	0.7458	6.9152	0.6256	1.5164	0.5593	0.5883	0.6049	5.233	0.8618	0.5801	0.5883	1.3507	0.9737	0.8121	0.8452	2.3037	0.7002	0.7209	1.5164	0.6505	417.35
M152-B12	190.11	1.4938	0.647	1.3676	0.7627	0.6575	15.3013	1.2782	1.5464	0.8574	1.294	1.1362	0.8995	0.7364	0.7574	1.0678	0.81	0.81	2.1882	1.4465	3.6031	0.768	0.547	0.6628	0.6049	1.8989	1.0362	35.7521	0.8311	7.2325	0.8416	2.0935	0.7732	0.9047	0.7785	7.3377	1.1414	0.7785	0.8153	1.5359	0.8626	0.931	0.8626	2.3091	0.8469	0.9626	1.2151	0.7048	395.876
M152-C01	428.34	2.6288	0.3222	0.8101	0.3875	0.4646	3.761	0.4856	2.2832	0.5206	0.7121	0.8288	0.4179	0.3992	0.579	1.1276	0.3992	0.4833	3.5463	0.9852	3.3782	0.4342	0.2825	0.3549	0.3969	1.9984	0.6093	26.1685	0.4716	5.1314	0.3969	1.0973	0.4552	0.5019	0.4179	4.263	0.5836	0.4833	0.4366	0.9362	0.53	0.4996	0.5323	1.4031	0.4296	0.5626	1.1626	0.3759	301.845
M152-C02	482.68	1.6305	0.2714	0.6899	0.3273	0.3791	2.0034	0.3646	0.5304	0.3729	0.5884	0.6485	0.3439	0.2818	0.3149	0.636	0.4061	0.2921	0.6857	0.4516	0.6422	0.2652	0.2383	0.2963	0.2362	0.8328	0.5034	18.6333	0.3501	3.9529	0.3771	1.0587	0.3895	0.5117	0.2755	1.0877	0.29	0.3315	0.4206	0.3294	0.2735	0.3315	0.4102	1.0897	0.3501	0.2942	0.4061	0.317	322.029
M152-C03	453.17	1.922	0.3133	0.7392	0.3398	0.448	3.822	0.4965	0.9798	0.406	0.6664	0.8937	0.3928	0.3597	0.4149	0.7988	0.3531	0.4104	1.441	0.6377	1.8558	0.3862	0.3266	0.3023	0.3641	1.2048	0.5914	22.5963	0.406	4.4729	0.3818	1.1078	0.3928	0.5208	0.331	1.9529	0.4568	0.3818	0.4347	0.5936	0.4435	0.3553	0.4833	1.1828	0.331	0.3818	0.7039	0.3597	309.819
M152-C04	460.29	1.9965	0.3346	0.7821	0.3672	0.4627	3.8736	0.5084	0.8516	0.5279	0.6843	0.8038	0.3715	0.3302	0.3519	0.7865	0.3845	0.3758	1.2253	0.6061	1.7054	0.3324	0.3042	0.415	0.3628	1.5099	0.5605	22.1641	0.4584	4.2234	0.3737	1.0363	0.3606	0.5518	0.3346	1.8944	0.4584	0.3976	0.4562	0.6235	0.4171	0.3824	0.4323	1.2058	0.3693	0.3954	0.7061	0.3976	300.202
M152-C05	314.19	1.7346	0.5443	0.9326	0.4838	0.557	3.4915	0.6461	1.7633	1.2763	0.8434	0.7607	0.4997	0.4774	0.6047	1.2954	0.4806	0.5888	2.5717	1.1554	3.1924	0.5793	0.5283	0.522	0.5952	1.9447	0.6493	22.617	0.592	3.9658	0.4456	1.0694	0.6079	0.592	0.6366	3.7271	0.697	0.487	0.4551	1.4896	0.783	0.6079	0.7002	1.3209	0.592	0.5506	1.2986	0.5761	219.725
M152-C06	440.75	1.502	0.4356	0.9461	0.4379	0.4129	4.9484	0.506	1.5632	0.8191	0.7578	0.9711	0.4152	0.3517	0.4402	1.0709	0.363	0.4402	2.616	0.962	3.013	0.4515	0.2745	0.3766	0.3539	1.899	0.5899	31.4305	0.4628	5.9966	0.4583	1.3046	0.4583	0.5355	0.3857	3.7482	0.5082	0.3993	0.4765	1.0709	0.667	0.4583	0.5559	1.7062	0.5377	0.4538	1.1254	0.4719	336.899
M152-C07	452.44	1.346	0.3293	0.8686	0.4553	0.3669	2.7341	0.4818	1.083	0.6984	0.7316	0.8178	0.4001	0.3271	0.4001	0.8421	0.4045	0.4001	1.7439	0.7979	3.3375	0.4354	0.3293	0.3205	0.3094	1.6157	0.599	27.7054	0.4664	5.3466	0.442	1.3063	0.442	0.4686	0.378	4.6592	0.5459	0.3669	0.5061	0.8288	0.5172	0.4796	0.5238	1.5914	0.4664	0.3956	0.9349	0.3625	341.151
M152-C08	438.68	1.3358	0.383	0.8526	0.3397	0.4263	1.9354	0.3351	1.37	0.921	0.6246	0.6748	0.3465	0.3305	0.4035	0.8229	0.3556	0.4377	1.9992	0.6269	2.5782	0.3989	0.31	0.3556	0.3693	1.5136	0.4742	24.64	0.4628	4.8601	0.4263	1.2378	0.4673	0.4308	0.3807	4.3266	0.5425	0.3169	0.3966	0.8412	0.4901	0.4354	0.4491	1.4521	0.3739	0.3989	0.9096	0.4331	306.976
M152-C09	261.44	0.7076	0.6082	1.4114	0.7	0.6235	2.3753	0.5278	1.7595	1.3617	1.0213	1.1513	0.6043	0.6349	0.6541	2.0923	0.6694	0.6043	2.5321	1.2852	7.2139	0.8147	0.5049	0.5852	0.5814	2.3065	0.8071	37.4848	0.7573	7.3172	0.6655	1.8857	0.7	0.8338	0.6808	9.092	1.1284	0.7382	0.5814	1.9699	0.6541	0.742	0.7956	2.0731	0.6694	0.6196	1.4879	0.7114	405.582
M152-C10	429.84	0.8864	0.342	0.8236	0.4002	0.4397	1.4587	0.3397	1.247	0.6514	0.6561	0.6142	0.3373	0.3397	0.3583	0.6863	0.3653	0.3746	1.8007	0.6072	2.0915	0.3769	0.2769	0.4071	0.356	1.2609	0.5072	25.2632	0.442	5.1601	0.4211	1.3843	0.3722	0.5374	0.3606	3.5642	0.5397	0.328	0.4257	0.6258	0.4071	0.4234	0.4909	1.2889	0.3676	0.4351	0.798	0.3908	340.058
M152-C11	439.95	1.2615	0.2955	0.9183	0.4137	0.4841	2.3616	0.4614	2.1139	0.5751	0.6546	0.9569	0.3955	0.366	0.5046	1.5002	0.4705	0.491	3.1867	1.2047	5.8098	0.5114	0.3228	0.3841	0.4796	3.0754	0.7205	33.7653	0.516	6.128	0.4751	1.4547	0.4955	0.5228	0.491	7.6168	0.8546	0.4364	0.4796	1.9093	0.9319	0.5523	0.5205	1.9548	0.4637	0.5705	2.1116	0.4432	332.953
M152-C12	345.22	0.6836	0.4809	0.8082	0.4258	0.4316	2.3174	0.5243	2.4593	0.8922	0.924	0.8256	0.4374	0.4924	0.6662	1.9031	0.5011	0.646	3.6412	1.1645	4.7071	0.5851	0.4664	0.4461	0.4664	2.3232	0.7387	29.2509	0.5011	5.2054	0.617	1.2543	0.7155	0.533	0.504	6.1091	0.814	0.4953	0.478	1.7062	0.9212	0.5938	0.588	1.8394	0.5301	0.6141	1.9669	0.6662	280.05
M152-D01	336.02	1.119	0.5208	0.9523	0.4375	0.4166	3.4045	0.4404	2.0891	0.7589	0.8541	0.9255	0.366	0.4107	0.5595	0.9553	0.4404	0.6458	3.1456	0.8839	2.3391	0.4375	0.4345	0.4583	0.4315	1.7231	0.741	29.3135	0.5416	5.7407	0.5089	1.5029	0.5208	0.5654	0.4791	3.4432	0.5446	0.4643	0.4434	0.8511	0.6071	0.5982	0.6309	1.6963	0.5565	0.5535	1.0892	0.5892	345.697
M152-D02	487.21	0.9975	0.3961	0.7307	0.3181	0.3756	2.541	0.4064	1.0016	0.7553	0.5644	0.5706	0.3222	0.2812	0.3756	0.8518	0.351	0.39	1.5312	0.6527	2.1962	0.3736	0.2689	0.3305	0.3243	1.4142	0.5029	21.5059	0.4269	4.0229	0.3961	1.0098	0.3777	0.4577	0.3448	2.8673	0.4803	0.3202	0.4167	0.7656	0.4721	0.4125	0.4598	1.1063	0.4105	0.3592	0.823	0.3387	273.818
M152-D03	457.41	2.9973	0.3389	0.7215	0.3454	0.4241	4.7944	0.5203	0.8264	0.4263	0.6427	0.7739	0.3782	0.3192	0.3935	0.8242	0.3607	0.4066	1.2243	0.5837	1.3533	0.376	0.3345	0.3717	0.3826	1.1609	0.5444	20.3778	0.4504	4.1167	0.352	1.0341	0.4176	0.4744	0.3717	1.4538	0.3913	0.3498	0.3717	0.5356	0.3957	0.3542	0.4482	1.1019	0.3848	0.3236	0.6121	0.3564	293.667
M152-D04	466.29	1.1087	0.4504	0.8471	0.3453	0.3474	5.2263	0.5554	1.394	0.7184	2.9166	0.8471	0.3624	0.2788	0.4182	0.7678	0.3624	0.4418	2.1038	0.6755	1.9837	0.3967	0.3903	0.3946	0.3796	1.4948	0.5126	24.5104	0.4289	5.0762	0.4332	1.2246	0.4053	0.4053	0.3388	2.5242	0.4461	0.3367	0.4118	0.7527	0.4547	0.4203	0.4375	1.3554	0.4203	0.4225	0.8342	0.341	302.784
M152-D05	439.39	0.8444	0.3937	0.792	0.3391	0.396	2.4716	0.3846	0.9786	0.9627	0.6031	0.5621	0.3141	0.3186	0.3846	0.8626	0.3823	0.355	1.5271	0.6782	1.716	0.3687	0.3004	0.3095	0.3596	1.279	0.503	19.1857	0.4165	3.7256	0.355	0.9513	0.3983	0.4506	0.3141	2.2372	0.4483	0.3004	0.3459	0.6828	0.4301	0.4097	0.4165	1.0492	0.4119	0.3801	0.6896	0.3937	250.158
M152-D06	358.79	1.0173	0.4627	1.0926	0.3874	0.471	4.1054	0.51	1.388	1.1288	0.7776	0.8724	0.4655	0.4348	0.432	1.636	0.51	0.5519	2.0903	1.048	3.339	0.5073	0.4041	0.4682	0.4181	1.8618	0.6856	29.8919	0.5017	5.8641	0.4989	1.4103	0.5296	0.4682	0.4738	4.8803	0.6187	0.4069	0.4153	1.3824	0.6661	0.5546	0.5519	1.5775	0.5741	0.5379	1.1901	0.5323	329.686
M152-D07	234.32	0.6188	0.5591	1.2291	0.6402	0.6359	4.5494	0.734	1.7626	0.9389	1.148	1.1181	0.6786	0.6274	0.7639	1.6943	0.7383	0.6231	2.7015	0.9901	5.3347	0.8279	0.606	0.6103	0.5889	2.6332	0.9944	41.6829	0.7298	7.3277	0.6871	1.8266	0.7554	0.8237	0.67	7.6606	1.1096	0.8322	0.6146	1.8095	0.973	0.8621	0.8578	2.4113	0.717	0.7469	1.8266	0.717	408.302
M152-D08	421.55	0.8896	0.3369	0.8421	0.3819	0.3582	2.4695	0.4223	0.7567	0.5243	0.5836	0.6405	0.3796	0.3416	0.3297	0.6334	0.3297	0.3203	1.039	0.5338	1.421	0.3582	0.2918	0.3677	0.3013	1.2241	0.5883	22.14	0.4816	4.308	0.3938	1.1007	0.4057	0.5195	0.3653	1.6795	0.4294	0.3606	0.427	0.6049	0.465	0.4673	0.5077	1.281	0.4389	0.4223	0.7662	0.4294	311.869
M152-D09	390.02	0.9692	0.441	0.982	0.4718	0.441	3.3922	0.4641	1.6948	0.5487	0.8487	1.323	0.4128	0.3564	0.5128	0.8538	0.4256	0.4743	2.5666	0.8846	3.9819	0.4795	0.3897	0.3769	0.3615	1.3897	0.6513	34.2651	0.5179	7.2663	0.4846	1.564	0.482	0.4769	0.4051	5.0229	0.6436	0.5102	0.3897	0.9871	0.4538	0.4846	0.6846	2.0204	0.4307	0.459	1.1025	0.4333	433.35
M152-D10	349.29	2.6969	0.4123	0.6613	0.4266	0.6127	3.2265	0.5182	1.0307	0.793	0.6241	0.6585	0.3951	0.3808	0.4237	1.045	0.4924	0.438	1.7321	0.7759	1.8323	0.481	0.3693	0.5039	0.4982	1.2711	0.5755	16.3874	0.4667	3.1492	0.5955	0.856	0.5583	0.5067	0.5268	1.9239	0.5067	0.4523	0.4352	0.7615	0.5497	0.4237	0.5554	1.0249	0.4752	0.5182	0.7816	0.4495	215.25
M152-D11	452.48	1.2222	0.4044	0.6475	0.3359	0.3978	2.42	0.3934	0.9835	0.3624	1.178	0.8243	0.3205	0.4265	0.3845	0.8619	0.3934	0.3823	1.4763	1.0188	0.789	0.389	0.3845	0.3868	0.3691	1.2907	0.5149	20.3325	0.4288	4.1593	0.5149	1.0012	0.4951	0.5393	0.3757	0.389	0.3801	0.3845	0.4486	0.6277	0.4	0.3978	0.4575	1.2487	0.431	0.3691	0.7227	0.3624	301.604
M152-D12	436.39	0.7104	0.3575	0.9395	0.3827	0.4331	1.8218	0.3827	2.5711	0.637	0.6897	0.6508	0.3666	0.3919	0.6027	0.9624	0.401	0.5729	3.985	0.9785	4.0354	0.4835	0.3162	0.3323	0.4033	2.1449	0.6531	31.1716	0.5133	6.0221	0.4629	1.242	0.4881	0.4423	0.4216	5.4401	0.6645	0.3529	0.3644	1.3726	0.6393	0.4743	0.5225	1.7874	0.5591	0.5064	1.5193	0.4629	350.041
M152-E01	368.41	2.5569	0.3556	0.9527	0.4343	0.4424	5.6133	0.5727	1.444	0.684	0.779	0.9853	0.4099	0.4397	0.4859	1.0776	0.4886	0.494	2.1851	0.9012	3.0292	0.4696	0.437	0.4452	0.4886	1.6395	0.6514	29.5106	0.5022	5.7707	0.4452	1.5309	0.5456	0.4777	0.532	4.3918	0.5972	0.3773	0.4126	0.9853	0.6026	0.6053	0.6704	1.7345	0.4452	0.513	1.0586	0.4886	329.516
M152-E02	366.37	1.2719	0.5159	0.7342	0.4422	0.4777	2.7486	0.6114	1.5804	1.6732	0.6824	0.6687	0.4285	0.4258	0.6087	2.2982	0.5568	0.4913	2.5766	0.9744	2.6039	0.4367	0.4804	0.4258	0.5595	1.5831	0.595	17.2886	0.4476	3.229	0.5186	0.8871	0.5432	0.4886	0.4231	2.7623	0.5514	0.4613	0.3767	1.1191	0.6114	0.4586	0.494	1.029	0.3739	0.4313	1.0973	0.6251	165.525
M152-E03	407.34	0.4542	0.5131	0.7782	0.3462	0.4223	4.3871	0.68	1.1391	0.6064	0.8101	0.9034	0.437	0.3584	0.437	0.7119	0.4223	0.4885	1.6105	0.6579	1.6056	0.4075	1.0458	0.6211	0.3388	1.4902	0.518	24.0662	0.4444	4.6571	0.4394	1.0016	0.4444	0.5401	0.4223	2.4599	0.4836	0.4247	0.4959	0.766	0.4542	0.4321	0.4714	1.1735	0.3854	0.4468	0.7512	0.3314	316.909
M152-E04	472.22	1.3405	0.3537	0.9614	0.3939	0.3833	4.3751	0.4849	1.169	0.54	0.8259	0.8513	0.3367	0.3071	0.3833	0.7242	0.3748	0.4278	1.8551	0.6459	2.6958	0.4574	0.2753	0.3748	0.2986	1.8064	0.6374	31.4157	0.468	6.2895	0.4024	1.3871	0.4913	0.6099	0.396	3.9855	0.54	0.3346	0.4341	0.7412	0.4405	0.4595	0.5527	1.7471	0.4151	0.4235	0.8915	0.3642	382.446
M152-E05	425.91	0.9462	0.4109	0.9157	0.4414	0.4062	2.3878	0.4038	1.0401	0.9298	0.6668	0.7983	0.3944	0.3029	0.3991	0.9392	0.3733	0.3991	1.4792	0.6739	1.9206	0.4203	0.3968	0.4179	0.317	1.4205	0.5236	24.5827	0.4344	4.6465	0.4109	1.1153	0.4884	0.4367	0.3522	2.9114	0.4344	0.317	0.432	0.7302	0.4485	0.5377	0.54	1.343	0.3827	0.4038	0.749	0.3944	307.596
M152-E06	417.87	1.2037	0.3111	0.7347	0.3685	0.4714	3.482	0.4738	1.1295	0.4308	0.5935	0.7179	0.4355	0.3614	0.4284	1.3832	0.4714	0.4571	1.8307	1.2564	1.0697	0.3661	0.3973	0.4116	0.3614	1.6584	0.6102	20.2217	0.5002	4.0156	0.4786	1.0458	0.5073	0.6198	0.4284	0.3853	0.4355	0.402	0.481	1.053	0.493	0.4403	0.5097	1.3545	0.4571	0.4978	1.0266	0.3853	278.093
M152-E07	214.45	1.3103	3.7398	0.9513	0.8487	0.8254	1.6647	0.8673	1.1611	1.0539	40.3028	2.173	0.7647	1.0212	0.6715	1.8326	0.7694	0.8393	1.4409	1.1378	2.4295	1.1285	3.6092	0.8393	0.6808	2.0657	1.0026	27.3348	0.7274	5.0874	0.7834	1.4409	0.7694	0.8906	0.83	5.4558	0.9699	0.7321	0.6995	2.0144	0.9466	0.886	0.9606	1.7999	0.7414	0.7834	2.0611	0.9279	338.193
M152-E08	403.22	1.0094	0.3844	0.9003	0.4092	0.3819	2.1428	0.377	1.2252	0.5357	0.9871	0.6795	0.3596	0.4191	0.4241	0.6473	0.4067	0.4712	1.7311	0.6051	2.0213	0.4415	0.3348	0.3472	0.372	1.436	0.5655	24.9569	0.4861	4.98	0.4117	1.4062	0.4291	0.5035	0.3348	3.2662	0.5059	0.3497	0.4241	0.6349	0.5407	0.4291	0.4514	1.4112	0.4613	0.4216	0.8283	0.367	344.759
M152-E09	406.4	1.282	0.3716	0.8883	0.4601	0.502	2.5025	0.4158	1.3091	0.5093	0.6914	0.7333	0.3691	0.3642	0.502	0.8268	0.4035	0.4626	1.9808	0.7333	3.3735	0.4798	0.3568	0.374	0.3888	1.4616	0.5487	20.6127	0.5364	4.2274	0.4331	1.0458	0.4577	0.5093	0.374	4.0231	0.5586	0.4675	0.4675	0.8957	0.534	0.5192	0.4281	1.3558	0.497	0.4331	0.9966	0.4798	288.821
M152-E10	314.29	0.7127	0.7573	0.91	0.49	0.4868	10.5029	0.9068	1.6386	0.6682	1.0118	1.0341	0.4868	0.4645	0.7827	1.1232	0.5377	0.7445	2.3608	0.8845	2.6249	0.5154	1.1232	0.6968	0.5091	1.8359	0.7986	27.0447	0.595	5.2912	0.5823	1.4095	0.665	0.5568	0.5632	3.5858	0.6936	0.5059	0.5154	1.0754	0.5854	0.5823	0.7254	1.68	0.56	0.49	1.2472	0.4582	329.841
M152-E11	265.79	1.0798	0.6321	0.982	0.4665	0.7788	3.5517	0.7337	2.7729	1.3131	1.0159	1.1475	0.5606	0.5907	0.7224	2.028	0.602	0.6697	4.229	1.3545	7.4948	0.7562	0.5907	0.5192	0.7073	3.7436	0.9782	38.4897	0.6321	6.5391	0.6396	1.6969	0.8616	0.7261	0.7412	8.4166	1.0535	0.6848	0.5493	3.04	1.3582	0.9745	0.7713	2.3101	0.6735	0.7224	2.6638	0.7788	292.356
M152-E12	319.11	0.4607	2.7075	0.7584	0.4607	0.5359	1.3005	1.1657	1.6922	1.1438	1.7674	0.8336	0.4387	0.4732	0.5641	1.0529	0.5327	0.5578	2.5728	0.89	4.3465	0.6299	0.4857	1.6327	0.4732	1.7517	0.774	22.3026	0.5923	4.1334	0.5547	1.0999	0.5703	0.5547	0.5233	6.3896	0.8085	0.4575	0.4607	1.2472	0.7458	0.5735	0.5703	1.1814	0.5139	0.5578	1.2284	0.5359	242.336
M152-F01	435.28	1.5186	0.4526	0.7857	0.3492	0.4618	2.75	0.4273	2.3296	1.5048	0.5973	0.6846	0.3974	0.3377	0.7122	1.7621	0.4365	0.6019	4.6109	1.367	4.2732	0.4664	0.3033	0.3974	0.5077	2.5754	0.6525	24.6166	0.4985	4.4914	0.4549	1.0017	0.51	0.5652	0.4733	5.0841	0.6616	0.4319	0.4641	1.7345	0.7467	0.5146	0.5054	1.4037	0.471	0.4985	1.6013	0.5192	228.958
M152-F02	449.08	0.3229	3.2355	0.8662	0.4298	0.3296	0.8707	1.8059	0.4097	0.4587	0.717	0.7861	0.3541	0.3496	0.2984	0.4164	0.432	0.3496	0.3652	0.8885	1.7926	0.4921	0.3563	1.6211	0.314	0.9375	0.5834	32.6513	0.5678	7.2615	0.4721	1.581	0.4209	0.5946	0.3763	7.6334	0.697	0.3296	0.4476	0.3474	0.2895	0.3875	0.5856	1.3227	0.3919	0.5233	0.4053	0.3162	418.813
M152-F03	418.99	2.4368	0.4797	0.759	0.3843	0.4606	3.6565	0.4893	1.3079	0.9547	0.7709	0.7781	0.3938	0.315	0.4201	0.9905	0.3628	0.432	2.129	0.8616	2.1099	0.4702	0.3485	0.358	0.4129	1.5275	0.6253	23.7693	0.463	4.53	0.4248	1.117	0.4511	0.5108	0.4081	2.7495	0.5155	0.4224	0.4893	0.895	0.5728	0.4702	0.5871	1.3962	0.4344	0.4201	0.8401	0.4702	292.139
M152-F04	461.77	0.6129	0.3248	0.7623	0.3703	0.3985	1.9035	0.3703	1.0503	0.6692	0.6692	0.6259	0.301	0.2859	0.3227	0.6259	0.34	0.3876	1.4986	0.6085	1.7866	0.3617	0.2902	0.2794	0.3357	1.2929	0.4873	22.8816	0.392	4.5499	0.379	1.0611	0.4093	0.4938	0.288	2.8391	0.4569	0.2859	0.3768	0.654	0.4331	0.4115	0.4504	1.2474	0.3681	0.3703	0.7125	0.3335	319.372
M152-F05	359.11	1.164	0.401	1.0693	0.4567	0.4149	4.539	0.5569	2.0161	0.66	0.7881	1.2448	0.5012	0.3982	0.6071	1.1918	0.5709	0.543	2.9016	0.9162	2.9156	0.5319	0.4066	0.4038	0.4456	1.966	0.7017	34.0651	0.4985	6.7139	0.5096	1.5204	0.504	0.5012	0.4511	3.375	0.6349	0.4511	0.4929	1.0136	0.5709	0.518	0.6015	1.8713	0.4678	0.4623	1.2253	0.4985	384.847
M152-F06	395.9	1.0583	0.4218	0.6138	0.3612	0.5229	2.003	0.4951	1.1771	1.1442	0.5835	0.6062	0.3713	0.3612	0.442	1.1771	0.4648	0.4218	1.9247	0.8487	3.0083	0.5506	0.3612	0.4142	0.4294	1.8792	0.5885	21.6315	0.4824	3.9303	0.4243	1.0508	0.394	0.49	0.4723	3.5968	0.5784	0.4749	0.4067	1.1771	0.5759	0.4925	0.5026	1.1897	0.4799	0.4243	1.1796	0.5229	228.793
M152-F07	436.03	0.5206	0.2958	0.7178	0.383	0.3555	1.2981	0.3692	1.0045	0.6032	0.5711	0.6743	0.3647	0.3348	0.3853	0.6422	0.3899	0.344	1.4448	0.6307	2.0985	0.4105	0.3509	0.3073	0.344	1.415	0.5504	25.5118	0.461	4.9514	0.4885	1.4127	0.4472	0.438	0.3371	3.5685	0.5091	0.3371	0.3761	0.7889	0.3945	0.4289	0.4403	1.3508	0.4128	0.4105	0.9013	0.383	335.861
M152-F08	247.6	1.5226	0.6624	1.0137	0.6341	0.7431	3.9095	0.5816	1.567	0.8683	0.8804	1.2641	0.5129	0.5412	0.5816	1.0662	0.63	0.6381	2.4475	0.8845	2.9725	0.6664	0.4927	0.5573	0.5735	1.6882	0.6866	28.2147	0.7552	5.1454	0.7229	1.3974	0.7391	0.6543	0.626	3.9257	0.7512	0.5452	0.836	1.1026	0.7714	0.727	0.6381	1.6317	0.5856	0.6099	1.2439	0.5533	326.828
M152-F09	352.67	1.4121	0.5076	0.9187	0.4707	0.4991	3.363	0.5841	1.2448	0.6125	0.8762	0.8989	0.4112	0.4764	0.4934	0.9074	0.4679	0.4338	2.0586	0.862	3.1616	0.4537	0.4055	0.4225	0.414	1.5709	0.689	22.9906	0.4792	4.6673	0.5246	1.2505	0.4764	0.5104	0.431	4.1371	0.6437	0.4423	0.5246	0.9074	0.5359	0.5076	0.5898	1.3894	0.4197	0.4509	0.8733	0.4707	333.355
M152-F10	223.49	0.9307	0.6175	1.1007	0.6041	0.613	5.7096	0.6533	0.9486	0.9799	0.9218	1.0157	0.6354	0.6578	0.5772	1.3379	0.6085	0.6309	1.3647	0.9173	2.7295	0.5862	0.5504	0.698	0.5683	1.8122	0.7696	29.7783	0.7159	5.2487	0.6578	1.1858	0.6757	0.613	0.5593	4.8549	0.8681	0.6175	0.7115	1.1858	0.7652	0.7338	0.7204	1.8435	0.6309	0.6846	1.1634	0.7562	335.275
M152-F11	327.91	1.5065	0.5062	0.8722	0.4574	0.5428	2.5922	0.5001	1.1009	0.677	0.7289	0.7411	0.4147	0.3995	0.4422	0.9728	0.4483	0.4849	1.7383	0.7289	1.6041	0.4788	0.4026	0.4757	0.4727	1.1772	0.5794	18.7827	0.4605	3.5711	0.4147	1.0979	0.4208	0.5062	0.4574	1.8938	0.5062	0.4696	0.4971	0.735	0.5337	0.5642	0.4879	1.3052	0.5581	0.5367	0.7746	0.4422	265.08
M152-F12(pET28)	343.75	1.0065	0.3549	0.7709	0.4218	0.4858	2.2662	0.5033	1.8385	0.5731	0.7273	0.7302	0.4538	0.4451	0.6807	1.5389	0.4916	0.48	2.8887	0.9978	1.9869	0.4625	0.3753	0.4102	0.4015	2.1556	0.6225	24.0348	0.544	4.3403	0.5382	1.0734	0.4713	0.5556	0.5062	2.848	0.5178	0.4945	0.4422	1.1054	0.7215	0.5004	0.5091	1.6931	0.5091	0.5993	1.5331	0.4509	285.037
M152-G01	394.63	0.5119	0.3953	0.6259	0.3725	0.3674	6.3173	0.5803	1.0972	0.5575	0.6715	0.5879	0.3573	0.4206	0.4434	0.674	0.4333	0.5549	1.9258	0.7298	1.4951	0.4105	0.598	0.4587	0.3446	1.1631	0.5169	21.9596	0.4739	4.0747	0.4156	1.006	0.4612	0.5093	0.3497	2.0449	0.4384	0.4054	0.3953	0.6259	0.4485	0.3877	0.4612	1.2797	0.4485	0.3852	0.7653	0.4029	323.645
M152-G02	482.83	1.2199	0.2589	0.7021	0.2755	0.3604	1.9365	0.3604	0.8222	0.3645	0.5944	0.698	0.3148	0.321	0.3914	0.9092	0.3355	0.3521	1.2965	0.9403	0.7104	0.2962	0.2941	0.292	0.2962	1.2302	0.5426	19.7543	0.5136	4.0884	0.4349	1.0853	0.3355	0.6068	0.3417	0.3376	0.3397	0.321	0.3521	0.5633	0.3935	0.3334	0.4867	1.2406	0.3687	0.3562	0.5551	0.3065	296.722
M152-G03	485.5	1.6725	0.3707	0.7559	0.3481	0.4161	3.4645	0.449	0.482	0.2987	1.5283	0.861	0.346	0.2781	0.2987	0.6468	0.2966	0.3646	0.6097	0.4634	0.6262	0.2884	0.2636	0.3357	0.2904	1.1452	0.5561	21.8619	0.4593	4.5685	0.3563	1.1205	0.3625	0.5129	0.3048	0.9969	0.3337	0.309	0.3687	0.3955	0.309	0.3522	0.4428	1.1761	0.3213	0.2925	0.3687	0.2739	344.587
M152-G04	317.71	0.8152	0.513	1.0387	0.5288	0.4564	3.1475	0.4847	1.7689	0.5162	0.7963	1.1363	0.3966	0.4438	0.5854	1.5549	0.598	0.5068	2.5401	1.8067	1.2968	0.4532	0.4186	0.4281	0.4218	2.0081	0.7523	34.1412	0.5634	6.8868	0.4658	1.4573	0.5382	0.8152	0.5256	0.6736	0.5666	0.4658	0.6169	1.1174	0.6673	0.5005	0.5697	2.1246	0.5729	0.5917	1.3975	0.4564	403.161
M152-G05	379.41	0.875	0.3479	0.6036	0.34	0.4481	2.2956	0.4217	1.0516	0.5851	0.5957	0.6036	0.4059	0.3874	0.3795	0.7538	0.3295	0.4375	1.7158	0.6246	1.4443	0.369	0.3558	0.4033	0.3295	1.1491	0.485	17.7537	0.4902	3.4738	0.369	1.0068	0.4322	0.5271	0.4006	1.8581	0.4876	0.3848	0.4823	0.5851	0.4955	0.4164	0.485	1.0674	0.4006	0.4006	0.7274	0.3769	271.456
M152-G06	360.17	0.3859	0.4081	0.8579	0.4692	0.3804	8.1739	0.8385	1.019	0.5858	0.783	0.7052	0.3832	0.3887	0.4609	0.9856	0.4692	0.5664	1.5298	0.6997	1.5659	0.4137	0.6969	0.4998	0.4664	1.2078	0.6219	25.4629	0.5136	4.7811	0.4748	1.2272	0.5886	0.5969	0.4248	2.3767	0.5359	0.3637	0.4387	0.6303	0.4331	0.4831	0.5164	1.2661	0.4192	0.4081	0.7247	0.4442	348.149
M152-G07	384.23	0.3774	0.432	0.6793	0.367	0.3904	6.0146	0.6142	0.9578	0.4659	0.6064	0.5778	0.3357	0.3253	0.4685	0.5622	0.3852	0.6038	1.2623	0.5856	1.1243	0.4476	0.5361	0.3644	0.3774	1.0541	0.4945	18.9677	0.5231	3.7634	0.4476	1.0541	0.4607	0.5674	0.4346	1.598	0.4815	0.4216	0.4242	0.57	0.4815	0.4242	0.4372	1.041	0.3696	0.3956	0.7261	0.3774	294.403
M152-G08	330.56	0.7018	0.4507	0.8138	0.4386	0.4477	3.4577	0.5022	1.3159	0.7926	0.8168	0.8561	0.4356	0.4054	0.4659	0.9953	0.4689	0.5536	1.9875	0.7956	2.9011	0.4991	0.3963	0.487	0.4659	1.6759	0.7805	26.2642	0.5627	4.816	0.5052	1.1526	0.4961	0.5143	0.4326	3.1824	0.5869	0.4961	0.484	1.0467	0.6111	0.5566	0.6171	1.4158	0.5415	0.4477	1.0558	0.5778	309.369
M152-G09	334.71	0.8574	0.4242	0.7828	0.49	0.5019	2.3752	0.5139	1.2518	0.4661	0.6603	0.7618	0.4093	0.472	0.5079	1.5237	0.4392	0.487	2.1003	1.7537	1.3146	0.4302	0.4272	0.493	0.5169	1.9868	0.7469	22.1712	0.487	4.2813	0.5915	1.198	0.5348	0.6035	0.5408	0.5079	0.5228	0.5408	0.5019	1.1891	0.6155	0.5228	0.6423	1.4699	0.49	0.481	1.2488	0.475	300.397
M152-G10	254.74	1.7312	0.5378	1.056	0.6045	0.6517	3.6626	0.6713	1.8215	0.6203	0.8793	1.2523	0.5888	0.6713	0.6556	1.6645	0.6791	0.7734	2.5831	1.5349	1.3897	0.5457	0.5025	0.636	0.5849	1.8333	0.7812	27.9113	0.636	5.2525	0.5692	1.2955	0.6163	0.7459	0.5496	0.5496	0.5928	0.53	0.5967	1.2169	0.7969	0.5614	0.6634	1.8725	0.581	0.5653	1.3229	0.5771	355.082
M152-G11	258.94	0.811	0.5561	1.008	0.6141	0.6411	4.4722	0.699	2.5759	1.0775	1.0466	1.1007	0.5909	0.5909	0.7454	1.7533	0.6179	0.699	3.804	1.1779	6.4109	0.7608	0.587	0.5136	0.6604	3.163	0.8883	39.5775	0.7222	6.5847	0.5986	1.4521	0.6565	0.7067	0.5909	6.8125	0.8226	0.6063	0.56	2.6763	1.1663	0.9076	0.6836	2.3017	0.5832	0.7376	2.5952	0.672	339.873
M152-G12(WT)	292.82	0.8196	0.8401	0.8742	0.4576	0.5191	1.5572	0.6693	2.1651	1.3592	0.724	0.5976	0.5396	0.4542	0.6113	2.049	0.5362	0.6625	3.2204	1.4582	5.8943	0.7718	0.4132	0.6352	0.5601	2.5715	0.6625	26.6473	0.5123	4.7776	0.5806	1.1133	0.5669	0.5601	0.6147	10.689	1.1953	0.5635	0.5703	2.0968	0.9733	0.6864	0.6489	1.8168	0.5601	0.6898	1.8748	0.7718	242.804
M152-H01	433.08	0.4872	0.5957	0.5472	0.3002	0.3695	0.9236	0.5172	1.7988	1.0068	0.5426	0.441	0.3787	0.3094	0.508	1.4478	0.4364	0.4272	2.3645	0.919	3.93	0.4988	0.3163	0.4272	0.3671	1.5563	0.508	18.9135	0.4549	3.5652	0.448	0.8659	0.3902	0.5334	0.4133	6.597	0.8336	0.3279	0.3464	1.016	0.5357	0.4295	0.3648	1.0506	0.4572	0.4387	1.0137	0.4918	228.692
M152-H02	455.26	0.9291	0.2987	0.626	0.2921	0.3493	1.7243	0.4086	0.9884	0.369	0.5601	0.6106	0.3405	0.2899	0.4261	0.9775	0.4042	0.4042	1.397	0.9357	0.7227	0.3031	0.3053	0.3251	0.3471	1.0763	0.4964	16.9134	0.3822	3.4442	0.3427	0.8852	0.3449	0.5272	0.3602	0.3954	0.3514	0.3558	0.358	0.5843	0.4064	0.3712	0.4525	1.14	0.4173	0.3602	0.6963	0.3251	276.193
M152-H03	231.74	1.1263	0.561	1.2859	0.6171	0.6473	6.3476	0.7249	1.89	0.7163	1.0788	1.2816	0.6214	0.5782	0.6732	0.9148	0.6559	0.6041	2.7142	1.0098	3.7887	0.5739	0.5178	0.5955	0.5006	1.9591	0.8199	43.5099	0.6516	8.3456	0.6904	1.8555	0.6602	0.7077	0.5523	5.7737	0.7422	0.63	0.6041	1.0529	0.7077	0.7077	0.7595	2.6495	0.6343	0.7206	1.2298	0.5394	496.69
M152-H04	241.16	0.622	0.6759	1.0905	0.6427	0.5764	12.5558	0.8998	1.6918	0.8459	1.1776	1.2689	0.5598	0.6178	0.7215	1.0201	0.6676	0.7339	2.5875	1.0242	3.479	0.6303	0.7796	0.6095	0.5722	2.036	1.0035	38.2853	0.7049	7.0865	0.593	1.6711	0.7008	0.6427	0.6883	5.5523	0.8293	0.5391	0.7174	1.3311	0.7505	0.6469	0.7754	2.094	0.6386	0.7008	1.4223	0.5349	419.459
M152-H05	356.75	0.4429	0.5158	0.8718	0.398	0.3896	7.1226	0.7624	1.5529	0.5102	0.8185	0.7484	0.4177	0.5018	0.5158	1.0063	0.4681	0.6391	2.3238	1.3903	1.4632	0.4261	0.8381	0.5046	0.3812	1.4015	0.5802	24.0869	0.4569	4.7372	0.4317	1.0596	0.5438	0.5522	0.3952	0.8073	0.583	0.3952	0.4289	0.7624	0.555	0.5102	0.5298	1.6146	0.5494	0.5494	0.9951	0.4485	348.37
M152-H06	350.45	0.4451	0.6249	0.7191	0.468	0.4309	7.847	0.7733	1.0444	0.5279	0.8817	0.7933	0.4109	0.3938	0.5165	0.8189	0.4994	0.7818	1.6151	0.7305	1.635	0.5051	1.3697	0.6734	0.4451	1.2983	0.6021	23.8064	0.4765	4.3458	0.4366	1.013	0.468	0.4908	0.3881	2.8049	0.5307	0.4337	0.4822	0.7333	0.5136	0.6106	0.5564	1.4039	0.4508	0.4138	0.8418	0.4138	329.46
M152-H07	387.89	0.7244	0.5001	1.0364	0.4744	0.397	3.9109	0.5337	1.173	1.0364	0.8069	0.825	0.4589	0.464	0.4125	1.2452	0.4408	0.4666	1.5778	0.8456	3.4546	0.4512	0.3919	0.446	0.4563	1.9877	0.5337	28.1369	0.5414	5.1045	0.4512	1.3045	0.5105	0.4537	0.4331	5.8676	0.7476	0.397	0.4099	1.1627	0.5878	0.5569	0.5852	1.4592	0.4718	0.4434	1.1782	0.4305	300.433
M152-H08	423.39	0.5527	0.3212	0.7133	0.3992	0.359	1.7927	0.3968	1.0676	0.3803	0.5976	0.6165	0.3637	0.3637	0.4488	0.6424	0.3519	0.411	1.6037	0.9636	0.6944	0.3189	0.2763	0.4228	0.2952	1.0463	0.5149	21.6963	0.4677	4.4923	0.4157	1.162	0.4275	0.5291	0.3968	0.4086	0.3685	0.3377	0.4275	0.5763	0.3873	0.3779	0.4724	1.3085	0.4299	0.3897	0.7393	0.3732	347.176
M152-H09	172.89	0.8156	0.7519	1.3419	0.8445	0.7461	3.8348	0.856	1.4692	0.8503	1.0354	1.4055	0.8792	0.8503	0.9544	1.018	0.9428	0.8676	2.1112	0.9428	3.4647	0.885	0.6883	0.7404	0.6767	1.4576	0.9312	28.8395	0.9659	5.4949	0.8156	1.8567	0.7982	0.8618	0.8445	4.6273	0.9949	0.8329	0.7866	1.0701	0.8445	0.8387	0.9833	2.1864	0.7924	0.9486	1.2667	0.8271	408.021
M152-H10	393.89	0.5027	0.3656	0.8429	0.3961	0.4265	1.6172	0.4519	1.9244	0.4748	0.7236	0.7413	0.391	0.3681	0.6017	0.9038	0.4621	0.5128	2.9247	0.7997	3.4604	0.4874	0.5154	0.3859	0.3859	1.9549	0.6855	28.7037	0.5052	5.6107	0.4951	1.2059	0.4494	0.5052	0.4494	5.0954	0.688	0.3656	0.457	1.1932	0.7083	0.5433	0.5712	1.6807	0.4595	0.5078	1.5157	0.5078	353.596
M152-H11	417.95	0.5694	0.39	0.8709	0.4331	0.3326	1.8208	0.4044	1.7873	0.7106	0.6436	0.859	0.3852	0.3278	0.5503	1.1293	0.3852	0.469	2.73	0.6604	2.2898	0.4067	0.2943	0.3326	0.3637	1.2944	0.536	26.8286	0.4713	5.2997	0.4139	1.3686	0.4498	0.445	0.3445	3.2205	0.4953	0.3493	0.4977	0.7226	0.4737	0.4259	0.5001	1.4786	0.4067	0.3709	0.8279	0.4163	349.471
M152-H12	296.93	0.7039	0.6769	0.9969	0.5355	0.5018	2.6538	0.6096	2.4282	0.714	1.007	7.49	0.8285	0.4513	0.687	1.3202	0.5927	0.6601	3.5699	55.1683	3.3948	0.4883	0.5052	0.5894	0.5422	0.9666	0.6264	25.6426	0.5658	5.5535	0.4648	1.3943	0.5692	0.7039	0.4917	1.5189	0.8521	0.6129	0.5523	0.6332	0.5759	0.65	1.007	1.6233	0.6062	0.6433	2.5326	0.5759	350.897
[truncated: 154 more columns]

## Sheet: N159
Sample Name	Mean Intensity	m/z 102.17	m/z 104.14	m/z 107.08	m/z 108.11	m/z 113.12	m/z 117.17	m/z 118.16	m/z 119.12	m/z 120.11	m/z 122.12	m/z 123.08	m/z 124.11	m/z 127.10	m/z 129.10	m/z 130.10	m/z 131.09	m/z 133.11	m/z 135.11	m/z 136.10	m/z 137.08	m/z 138.10	m/z 139.10	m/z 140.12	m/z 143.10	m/z 144.09	m/z 145.09	m/z 146.09	m/z 146.73	m/z 147.09	m/z 147.76	m/z 148.10	m/z 149.10	m/z 150.12	m/z 151.14	m/z 152.09	m/z 153.09	m/z 155.11	m/z 155.60	m/z 160.11	m/z 161.11	m/z 162.09	m/z 163.10	m/z 164.10	m/z 165.11	m/z 166.10	m/z 169.10	m/z 170.11	m/z 172.07
N159-A01	376.29	1.2809	0.38	0.9009	0.4757	0.4358	3.1651	0.4465	2.1712	0.9514	0.776	0.9275	0.396	0.4146	0.5501	0.978	0.4465	0.5873	3.7444	1.0683	3.4096	0.5023	0.3402	0.3827	0.4438	1.8337	0.7149	33.0142	0.5607	6.3089	0.4305	1.4457	0.5395	0.6165	0.4571	3.7896	0.6405	0.4225	0.4597	0.97	0.6245	0.5129	0.675	1.8789	0.5023	0.5023	1.172	0.4677	365.891
N159-A02	256.42	1.3376	0.5187	1.0179	0.5538	0.5031	3.7243	0.6123	2.0162	0.8619	0.858	1.1115	0.5265	0.546	0.6864	0.9594	0.5577	0.7293	3.077	1.1427	6.1032	0.6708	0.4719	0.4875	0.5616	1.7744	0.6552	31.9591	0.624	6.2943	0.6201	1.595	0.6201	0.7137	0.5616	6.5829	1.0725	0.6474	0.5382	1.1465	0.8619	0.6786	0.78	1.8485	0.5499	0.7371	1.4195	0.585	368.674
N159-A03	222.04	0.617	0.6125	1.1079	0.6215	0.6305	1.86	0.5945	1.6979	1.0449	0.8647	1.3241	0.6395	0.6665	0.6756	1.8465	0.7476	0.7026	2.387	1.3601	8.8317	1.0719	0.8332	0.554	0.7431	3.076	1.0584	50.8511	0.8647	8.2823	0.7116	1.833	0.8107	0.8287	0.6305	8.6516	1.5988	0.7791	0.554	3.004	1.3421	0.9052	0.8422	3.1571	0.7881	0.8197	2.8869	0.8512	399.887
N159-A04	269.19	1.0253	0.4904	1.1144	0.6129	0.5126	4.2497	0.6352	1.9503	0.6612	0.8358	1.3782	0.5164	0.8024	0.6427	1.6419	0.6278	0.5498	2.8084	2.4555	1.8685	0.5572	0.5349	0.4941	0.5721	2.0951	0.9064	33.1508	0.5758	6.1926	0.5758	1.6159	0.6612	0.769	0.6835	0.7244	0.8618	0.5944	0.6092	1.393	0.8767	0.6984	0.743	2.4703	0.5907	0.6649	1.5193	0.5498	402.787
N159-A05	282.06	2.2477	0.5212	0.9537	0.5318	0.5814	4.0665	0.5885	1.1983	0.9253	0.78	1.0813	0.5105	0.4928	0.5779	0.9218	0.5318	0.5992	1.7549	1.0742	2.5668	0.5956	0.4893	0.5921	0.6736	1.6025	0.8438	28.9936	0.5885	5.5059	0.5318	1.4855	0.6133	0.5956	0.5531	2.3895	0.6665	0.6346	0.5389	0.8792	0.6772	0.5814	0.5921	1.7018	0.5708	0.5602	1.1168	0.4644	325.673
N159-A06	145.49	1.0173	0.8661	1.464	0.9004	1.0241	11.2587	1.2372	1.3128	1.2991	1.0791	1.3128	0.8111	0.8111	0.8523	1.1341	0.9485	0.9623	1.6634	1.2991	3.636	0.9142	0.9485	0.7904	0.9142	1.9452	1.086	33.8929	0.9898	6.4267	1.2097	1.629	1.0104	1.1891	1.031	4.6808	1.1341	0.9692	1.0035	1.4434	1.0035	0.9692	1.196	2.2682	1.0241	1.0929	1.5259	0.9417	370.079
N159-A07	373.39	2.5309	0.4606	0.7097	0.3776	0.4446	3.57	0.4794	1.007	0.7686	0.6321	0.7311	0.3857	0.4687	0.4071	0.9668	0.4178	0.4124	1.781	0.774	1.9604	0.474	0.3857	0.3455	0.3883	1.2213	0.6187	19.6954	0.4553	3.9691	0.474	1.0552	0.5678	0.474	0.4258	1.6471	0.5249	0.466	0.4098	0.7419	0.4606	0.4232	0.5008	1.1891	0.4339	0.4339	0.8972	0.474	263.95
N159-A08	317.62	1.4483	0.4502	0.9886	0.6077	0.573	4.1339	0.6958	1.3885	1.0831	0.9225	1.0075	0.4408	0.4565	0.573	1.2248	0.5163	0.4912	2.1693	0.9131	2.9816	0.5415	0.3999	0.4754	0.466	1.7285	0.6738	29.8034	0.6423	5.5822	0.4849	1.3507	0.5573	0.5415	0.5069	2.9973	0.6297	0.4282	0.4534	1.0516	0.8375	0.5384	0.5604	1.7033	0.4975	0.5101	1.1272	0.5132	329.367
N159-A09	324.4	3.1104	0.4716	0.9803	0.5641	0.4716	4.3003	0.5672	0.6042	0.4994	0.7522	1.1005	0.5395	0.4285	0.4223	0.6689	0.4377	0.4871	0.7121	0.6319	1.2639	0.4716	0.4316	0.4223	0.4501	1.119	0.6535	26.116	0.5302	5.0493	0.4593	1.3163	0.4346	0.4932	0.4439	1.0666	0.5271	0.4686	0.4408	0.6751	0.484	0.558	0.6073	1.5321	0.4686	0.4346	0.598	0.4316	341.431
N159-A10	241	0.8382	0.5809	1.0332	0.6888	0.5809	3.8672	0.668	1.7842	0.9917	0.917	1.1743	0.5602	0.5228	0.7801	0.9875	0.668	0.7137	2.8921	1.195	3.1286	0.6307	0.5062	0.6431	0.5477	1.7593	0.7261	28.2817	0.6514	5.6472	0.6265	1.4564	0.5892	0.7469	0.6556	2.7925	0.8257	0.5436	0.6348	0.9336	0.7095	0.7593	0.6846	1.9543	0.5726	0.6597	1.0415	0.6473	347.75
N159-A11	259.11	1.1038	0.575	1.2311	0.5905	0.6059	7.603	0.7757	0.8259	0.7101	0.9841	1.0189	0.5133	0.5056	0.4824	0.7835	0.5287	0.6098	0.9648	0.9417	3.8903	0.5635	0.5017	0.5712	0.5172	1.6325	0.6831	32.5964	0.6252	5.6308	0.5828	1.8294	0.6831	0.5789	0.521	4.0022	0.8182	0.5635	0.6098	0.9571	0.6484	0.6214	0.66	2.1767	0.6098	0.6484	1.0883	0.5442	381.512
N159-A12	217.27	1.1967	0.8607	1.077	0.7732	0.7088	9.3342	1.054	3.2173	1.5327	1.1323	1.031	0.5891	0.6214	0.8331	1.6385	0.741	0.8285	4.4186	1.8963	11.4698	1.1	0.6904	0.8285	0.8193	3.2219	1.0632	43.15	0.6582	7.1709	0.7134	1.7214	0.8331	0.8745	0.7548	10.3882	1.5695	0.8377	0.6904	3.2265	1.3486	0.9435	0.9758	2.4532	0.764	1.1691	2.6465	0.9159	344.022
N159-B01	215.06	0.6928	0.6789	1.195	0.5952	0.744	5.0358	0.6975	2.0366	0.9811	0.9207	1.2973	0.651	0.6603	0.7533	1.0137	0.6463	0.7905	3.1154	1.1067	5.3659	0.7347	0.5905	0.5115	0.558	1.9018	1.0137	39.1378	0.7207	7.463	0.6649	1.832	0.6324	0.823	0.6975	6.2261	1.0974	0.7207	0.7021	1.4136	0.8649	0.6789	0.8044	2.2505	0.8881	0.9904	1.4182	0.6835	435.421
N159-B02	301.77	0.9212	0.4573	1.1797	0.5302	0.4208	3.675	0.4606	1.4547	0.6164	0.7986	1.3023	0.4275	0.4938	0.5203	0.7688	0.5932	0.5567	2.4555	0.9047	2.5019	0.6031	0.4308	0.4639	0.4606	1.5939	0.729	36.6338	0.5534	7.224	0.5799	1.6867	0.57	0.5633	0.4772	3.4496	0.6296	0.4474	0.613	1.0869	0.7589	0.6462	0.6992	2.1672	0.5998	0.6097	1.0008	0.4573	412.204
N159-B03	335.67	1.1112	0.4111	0.7716	0.4767	0.5005	1.9811	0.4707	1.0814	0.5958	0.6286	0.6286	0.4081	0.3486	0.4796	0.8967	0.423	0.4588	1.6921	0.6226	1.6266	0.4409	0.4141	0.4767	0.4052	1.1053	0.5631	17.1091	0.5809	3.4319	0.4469	0.998	0.435	0.5303	0.4081	1.8917	0.4796	0.4052	0.4558	0.715	0.5303	0.4647	0.4737	1.0933	0.4886	0.4052	0.7656	0.3813	259.44
N159-B04	320.32	0.5338	0.6806	0.8897	0.5058	0.4464	1.2925	0.6244	0.9522	0.5245	0.6712	0.5963	0.4183	0.4215	0.4371	0.59	0.3778	0.4808	1.2144	0.6306	2.1822	0.4558	0.5307	0.5557	0.4246	1.0739	0.5463	20.7919	0.5776	4.2552	0.5619	1.1239	0.4496	0.5089	0.4402	3.2218	0.5807	0.4464	0.4839	0.6088	0.4839	0.4964	0.5089	1.28	0.4027	0.4714	0.6119	0.4246	310.312
N159-B05	397.13	1.2187	0.3727	0.8234	0.3979	0.4079	1.9062	0.4784	0.7051	0.8612	0.6119	0.7051	0.3903	0.3273	0.3827	1.5108	0.4356	0.355	0.8612	0.7705	2.3695	0.4986	0.355	0.35	0.355	1.2716	0.5842	24.3244	0.4734	4.3915	0.3853	1.1784	0.4104	0.4432	0.3576	3.8627	0.5993	0.3676	0.3853	0.6723	0.5036	0.4205	0.5086	1.3723	0.4709	0.3853	0.7579	0.4407	308.6
N159-B06	331.95	1.3496	0.6356	0.6266	0.3555	0.476	2.633	0.491	1.7563	1.5665	0.5995	0.711	0.5061	0.4489	0.4971	2.3679	0.5513	0.5121	2.5064	1.0664	3.838	0.5302	0.4398	0.5061	0.4941	1.6027	0.5814	19.2139	0.5091	3.2324	0.4248	0.958	0.5724	0.4428	0.6266	3.9615	0.7833	0.4338	0.3977	1.2321	0.723	0.5513	0.476	1.211	0.5362	0.5543	1.2532	0.714	159.408
N159-B07	368.89	2.4154	0.3226	0.9217	0.4473	0.45	4.8931	0.4364	0.5557	0.5151	0.7753	1.1169	0.3416	0.3714	0.4175	0.7346	0.3985	0.4175	0.7157	0.5476	1.3392	0.4364	0.3877	0.4527	0.3904	1.1169	0.6099	27.0381	0.5313	5.2835	0.5205	1.3527	0.4988	0.4961	0.3768	1.8732	0.5015	0.4093	0.4663	0.5747	0.4473	0.4337	0.6208	1.4856	0.5015	0.3795	0.5368	0.4039	363.321
N159-B08	268.77	0.8632	0.4762	1.239	0.5507	0.5879	4.1151	0.5953	1.2278	0.7181	0.8967	1.1311	0.5172	0.5841	0.6102	0.9451	0.573	0.5469	1.4287	0.8223	3.3375	0.7107	0.5395	0.4242	0.4465	1.5925	0.759	30.1488	0.6176	5.6108	0.5395	1.4734	0.6065	0.6623	0.4688	3.7839	0.6548	0.5618	0.573	1.0344	0.7181	0.6251	0.7776	1.7004	0.5655	0.573	1.0976	0.5544	370.834
N159-B09	263.3	0.6077	0.5279	1.2571	0.6418	0.5317	4.1169	0.5849	1.1812	1.0026	0.8355	1.1166	0.5887	0.5659	0.4823	1.8306	0.6191	0.5279	1.5989	1.1128	2.5636	0.6874	0.4406	0.5583	0.4178	1.4812	0.7178	33.7939	0.7026	6.1146	0.5621	1.6863	0.5773	0.6684	0.5545	4.0676	0.7216	0.5317	0.5887	0.9609	0.6418	0.6874	0.6456	2.2066	0.5545	0.6532	0.9001	0.5849	388.546
N159-B10	298.62	1.1453	0.4856	0.9778	0.5391	0.5492	3.1042	0.6061	1.681	0.9745	0.73	1.1252	0.499	0.5425	0.5525	1.306	0.6128	0.5894	2.4613	1.2725	4.1691	0.5894	0.4487	0.4822	0.5693	2.0494	0.6597	33.6812	0.5425	5.8569	0.5391	1.3395	0.5324	0.5458	0.4956	4.7351	0.8439	0.6697	0.4889	1.172	0.7836	0.6664	0.7233	1.8351	0.5994	0.576	1.306	0.6496	355.227
N159-B11	318	0.9277	0.478	0.8994	0.4591	0.4969	3.588	0.5377	1.6918	0.7013	0.7704	0.9308	0.4654	0.4182	0.5629	0.8113	0.5252	0.5	2.4623	0.7925	2.4434	0.434	0.3648	0.4371	0.3805	1.4057	0.6604	26.0786	0.522	4.8428	0.4654	1.1887	0.5535	0.5409	0.4717	2.7044	0.6415	0.4969	0.5535	0.8082	0.7233	0.5692	0.5	1.5849	0.4906	0.5126	0.8365	0.4811	328.764
N159-B12	407.15	1.0758	0.4151	0.8277	0.366	0.4961	3.0407	0.5354	1.3656	0.813	0.7147	0.8375	0.3979	0.3488	0.5109	0.894	0.3881	0.4593	2.2522	0.8302	3.6547	0.4667	0.3832	0.393	0.4126	1.7463	0.6631	28.3655	0.4298	5.1161	0.4446	1.1519	0.4691	0.4937	0.4003	4.502	0.7024	0.4053	0.4396	1.0537	0.5895	0.5133	0.501	1.6309	0.4863	0.4814	1.2231	0.393	324.756
N159-C01	242.68	0.8695	0.581	0.956	0.5686	0.5645	8.0682	0.8365	1.0219	0.8488	0.8818	1.0549	0.5439	0.5851	0.5686	1.1332	0.5975	0.5563	0.9313	0.8736	5.1796	0.6964	0.5728	0.5604	0.5316	1.7513	0.7994	31.0324	0.6675	5.4104	0.6511	1.3557	0.6387	0.6305	0.581	6.6672	0.9354	0.5934	0.6717	1.0961	0.7376	0.7046	0.7211	2.151	0.6346	0.7788	1.1826	0.5851	350.385
N159-C02	124.36	1.1338	0.8926	1.5761	1.1499	0.9489	13.188	1.2786	1.2947	1.2062	1.0213	1.2062	0.9811	1.1258	1.0132	1.1338	1.0132	0.973	1.5842	1.2062	2.1229	0.9408	1.0373	0.973	0.8926	1.4796	1.0936	22.6688	0.9489	4.4871	0.9489	1.56	1.0695	0.9811	1.0213	2.5733	1.1821	0.9811	1.0776	1.1821	1.0132	1.0534	1.0454	2.324	1.1499	0.965	1.1419	0.9248	304.747
N159-C03	380.18	0.5734	0.4156	0.7838	0.3709	0.3919	1.6913	0.4998	1.2915	0.7076	0.6365	0.7786	0.3735	0.334	0.4577	0.7023	0.4314	0.4077	1.9648	0.8338	2.6408	0.5155	0.334	0.4077	0.455	1.2626	0.5918	23.5203	0.4577	4.6872	0.4682	1.2205	0.4498	0.4919	0.4682	3.2642	0.5655	0.3788	0.413	0.7207	0.5524	0.434	0.4971	1.2967	0.4366	0.434	0.7891	0.3709	307.521
N159-C04	365.48	1.1847	0.3666	0.747	0.4241	0.4651	5.6473	0.55	0.9905	0.6156	0.7606	0.6594	0.4542	0.3639	0.4569	0.7989	0.3858	0.4542	1.5213	0.9604	2.3531	0.4515	0.4186	0.4296	0.4132	1.2531	0.5718	19.4757	0.4569	3.639	0.4405	1.0835	0.4515	0.5609	0.4049	3.3791	0.6375	0.394	0.3885	0.7004	0.5746	0.4569	0.4788	1.1765	0.4159	0.4925	0.7907	0.435	264.394
N159-C05	376.28	0.5607	0.5076	0.6963	0.4119	0.4013	1.2358	0.5235	0.7096	0.4837	0.5634	0.6033	0.396	0.4093	0.4412	0.5368	0.396	0.3216	0.9062	0.6963	1.5786	0.38	0.3747	0.4544	0.3535	0.9328	0.4518	19.5836	0.4332	3.8588	0.3774	0.9806	0.3588	0.4412	0.4358	2.91	0.4677	0.3349	0.3508	0.5076	0.3667	0.4199	0.404	1.2225	0.4465	0.4279	0.5607	0.4013	305.349
N159-C06	315.87	0.4401	1.1144	0.8769	0.4654	0.4844	0.8105	0.8516	0.8643	0.6617	0.6712	0.7218	0.5319	0.4369	0.459	0.5857	0.4179	0.5097	1.1682	0.8358	2.4694	0.5635	0.4179	0.8231	0.4527	1.2948	0.6237	21.1067	0.5445	4.0238	0.4812	1.0289	0.5477	0.5888	0.4622	4.046	0.6838	0.592	0.4717	0.6965	0.5287	0.4401	0.5572	1.2347	0.478	0.5224	0.7725	0.4401	295.323
N159-C07	400.52	1.7777	0.392	0.8139	0.4569	0.5668	3.825	0.5443	0.9912	0.729	0.8888	0.749	0.4219	0.4219	0.4444	0.9238	0.4294	0.4519	1.6029	0.8739	2.8862	0.4969	0.3645	0.4244	0.3545	1.6054	0.5018	24.0536	0.4569	4.6215	0.5218	1.1435	0.4919	0.4794	0.4344	4.0622	0.5668	0.352	0.4244	0.7415	0.5018	0.5218	0.4644	1.4181	0.407	0.402	0.8139	0.357	305.516
N159-C08	379.98	1.3027	0.3526	0.7237	0.3842	0.4632	2.3975	0.4184	0.6606	0.9553	0.5737	0.6263	0.3921	0.3816	0.3763	1.5711	0.4763	0.4369	0.9764	0.8185	2.0422	0.4342	0.3684	0.3816	0.3342	1.0869	0.4658	16.2113	0.4316	3.0896	0.3895	0.9132	0.479	0.479	0.3632	2.8712	0.4711	0.3448	0.4605	0.7421	0.4605	0.429	0.45	1.1264	0.4079	0.4658	0.7369	0.529	214.54
N159-C09	155.76	1.3226	1.849	1.2327	0.8346	0.8732	14.8949	1.5409	1.1556	0.9887	1.1171	1.0914	0.8025	0.8218	0.8346	2.1058	0.9309	0.8667	1.3547	1.4702	4.4942	0.9181	0.8089	1.1428	0.8475	1.6307	1.0658	29.6229	0.9438	5.4636	0.8796	1.6436	1.0272	0.9438	1.085	6.9788	1.1556	0.8603	0.8988	1.5858	0.9117	0.8282	0.9117	2.1251	0.963	1.0465	1.3097	1.1107	331.47
N159-C10	410.22	0.8751	0.351	0.8922	0.3974	0.4656	2.5572	0.4193	1.0068	0.5485	0.6143	0.7264	0.3437	0.3462	0.4022	0.5558	0.3681	0.3998	1.4992	0.7459	2.2939	0.4705	0.4217	0.3608	0.3949	1.2359	0.5777	23.1049	0.4754	4.6317	0.4169	1.1652	0.4022	0.4827	0.3559	3.0277	0.5899	0.3681	0.429	0.6119	0.4875	0.4461	0.5314	1.3773	0.4997	0.4656	0.7654	0.4144	322.283
N159-C11	383.35	0.8321	0.3756	0.7095	0.4017	0.4487	1.7869	0.3652	1.0539	0.6339	0.5922	0.6104	0.3965	0.3678	0.4565	0.6365	0.4069	0.4539	1.6539	0.7017	1.813	0.4487	0.3104	0.3313	0.3313	1.0226	0.5322	17.8716	0.3965	3.6155	0.42	1.0147	0.3835	0.5009	0.3704	2.1104	0.5113	0.3939	0.4643	0.5269	0.4748	0.4356	0.4956	1.0774	0.3939	0.4043	0.6626	0.373	264.933
N159-C12	421.3	1.4218	0.3276	0.883	0.451	0.4629	5.5329	0.4842	0.8972	0.4391	0.8236	0.9993	0.3988	0.3608	0.356	0.9708	0.4605	0.4201	1.1987	1.6022	1.3696	0.3845	0.2848	0.4035	0.3394	1.5571	0.5815	27.6242	0.451	5.4451	0.4011	1.2628	0.4083	0.686	0.3679	0.5341	0.5032	0.4534	0.3916	0.7524	0.4676	0.4273	0.5317	1.69	0.4605	0.5103	0.8664	0.3822	368.343
N159-D01	263.55	0.7133	0.6033	1.1687	0.554	0.5502	7.6685	0.7133	1.385	0.6375	0.9258	1.3774	0.6033	0.5426	0.5919	0.8158	0.6337	0.5957	2.2083	0.8196	3.7413	0.5502	0.6185	0.5464	0.4895	1.6847	0.7741	36.6008	0.7361	7.198	0.6413	1.7834	0.5426	0.7779	0.5236	4.3598	0.8348	0.6033	0.5502	1.0548	0.6944	0.6261	0.7437	2.2387	0.5692	0.6261	1.2939	0.4743	429.671
N159-D02	303.91	1.0826	0.4409	0.9312	0.5857	0.5001	3.6261	0.6844	1.5037	1.0167	0.7634	0.8127	0.4903	0.4672	0.51	2.0466	0.6087	0.5429	2.6356	1.0036	2.8627	0.5232	0.4607	0.5627	0.5232	1.4971	0.5528	20.9765	0.5001	3.7972	0.51	1.1352	0.5495	0.5627	0.5495	4.6527	0.6383	0.464	0.464	0.872	0.6515	0.51	0.4969	1.461	0.5429	0.4969	0.8456	0.5989	247.131
N159-D03	195.75	0.8072	0.7765	1.1852	0.7203	0.6692	2.9068	0.8225	1.691	1.4304	1.0013	1.0422	0.751	0.6692	0.7101	1.8493	0.7408	0.6743	2.1252	1.1903	5.0627	0.8531	0.6079	0.7305	0.6999	2.4419	0.986	31.6022	0.7254	5.2415	0.613	1.553	0.7305	0.797	0.8174	6.1764	1.0524	0.7152	0.6948	1.9004	1.1443	0.9196	0.9758	1.8238	0.6897	0.8072	1.6246	0.7765	310.913
N159-D04	321.08	0.6322	0.4111	0.9748	0.5232	0.4298	2.9806	0.545	1.3361	0.816	0.735	0.9593	0.4672	0.4236	0.5201	0.9468	0.4734	0.4734	2.0898	0.9406	3.2173	0.5232	0.4485	0.4609	0.4018	1.7099	0.6447	30.3569	0.5139	5.5905	0.4827	1.4296	0.5668	0.5793	0.5544	4.1516	0.7039	0.4703	0.5201	0.9468	0.7288	0.5949	0.7568	1.7877	0.5793	0.5575	1.2489	0.5045	370.316
N159-D05	253.45	0.6905	0.6905	1.1008	0.6392	0.6589	3.547	0.8009	2.1779	1.3612	1.085	1.1363	0.6352	0.651	0.6392	1.9017	0.7062	0.6786	3.0144	1.6295	10.8501	0.9035	0.5208	0.7181	0.6865	3.6299	0.8483	38.9302	0.6747	6.589	0.6707	1.594	0.7733	0.7299	0.8601	10.8817	1.2389	0.7694	0.5326	3.3261	1.3533	0.8917	0.939	2.5764	0.6944	1.0377	2.821	0.8009	295.328
N159-D06	376.77	0.8599	0.4114	0.7936	0.4273	0.4751	2.1552	0.4273	0.8785	0.7485	0.6848	0.8228	0.4114	0.414	0.3742	0.775	0.4353	0.3583	1.0829	0.6556	2.325	0.4247	0.3212	0.3875	0.3769	1.1731	0.5149	22.5577	0.4618	4.3528	0.3928	1.1625	0.4565	0.4379	0.3875	2.6834	0.491	0.3212	0.4061	0.7485	0.4751	0.4459	0.4857	1.4651	0.3955	0.422	0.698	0.4061	286.816
N159-D07	352.74	1.7378	0.4564	0.7683	0.4394	0.5471	4.3318	0.4961	1.0007	0.6322	0.6861	0.8448	0.4536	0.3941	0.4564	0.9554	0.3912	0.4848	1.3778	0.7342	2.8179	0.4933	0.3657	0.4366	0.4564	1.4033	0.6662	21.71	0.5131	4.1305	0.5018	1.0829	0.5358	0.5415	0.533	2.9285	0.5443	0.3856	0.4678	0.8363	0.4621	0.4763	0.5245	1.2559	0.4791	0.4309	0.8108	0.3544	288.707
N159-D08	196.11	0.8414	0.6272	1.0963	0.6986	0.6884	8.3524	0.8414	1.0402	1.0555	0.928	1.1983	0.6629	0.8465	0.6527	1.1218	0.6476	0.7904	1.5501	1.132	3.8855	0.8771	0.5762	0.6323	0.6272	1.9071	0.872	37.9732	0.8057	7.2051	0.7394	1.9275	0.6425	0.821	0.7802	5.6702	0.9943	0.668	0.7343	1.1728	0.8108	0.7955	0.9433	2.5088	0.6629	0.9484	1.4125	0.6935	421.458
N159-D09	297.03	0.5757	0.5521	1.3433	0.5791	0.5454	2.6765	0.5858	1.1514	0.8215	0.9157	1.1211	0.4511	0.4747	0.441	1.1245	0.6228	0.4747	1.5217	0.8215	4.6392	0.5589	0.4309	0.4848	0.4612	1.8315	0.8686	45.4934	0.6498	8.4604	0.5387	1.6934	0.6531	0.5791	0.4747	5.0735	0.9258	0.5589	0.5555	1.313	0.6969	0.5993	0.6531	2.4038	0.6228	0.6666	1.047	0.4781	463.007
N159-D10	407.14	1.0709	0.3684	0.8793	0.4151	0.4126	3.3403	0.4274	0.8818	0.4986	0.6926	0.9211	0.3684	0.366	0.3684	0.6189	0.3586	0.4225	1.314	0.6312	2.466	0.4028	0.3119	0.4126	0.3316	1.2109	0.56	25.9393	0.4716	5.0547	0.3758	1.1691	0.4028	0.42	0.3439	2.8761	0.5968	0.4151	0.3709	0.6877	0.4593	0.3954	0.5551	1.3853	0.4151	0.4004	0.6288	0.3414	342.248
N159-D11	380.67	0.9168	0.444	0.7408	0.4045	0.4676	1.9413	0.6462	0.8038	0.6068	0.6804	0.6016	0.4072	0.3757	0.4387	0.7014	0.4019	0.3835	1.0114	0.8564	1.1795	0.4177	0.3651	0.5359	0.3651	1.2031	0.5517	17.0803	0.4308	3.2784	0.4492	0.9483	0.4308	0.5254	0.4072	1.0928	0.4965	0.4019	0.3783	0.5595	0.4807	0.3757	0.4965	1.0744	0.4124	0.4308	0.6462	0.3362	267.243
N159-D12	38.84	1.519	1.3646	1.4676	1.3388	1.4933	13.2595	1.9052	2.6261	1.725	2.0597	1.4418	1.3903	1.2873	1.5963	1.9567	1.2873	1.5448	2.3429	1.622	6.2822	1.4418	1.622	1.6478	1.4418	2.2914	1.4676	13.7744	1.5448	3.1411	1.6735	1.4161	1.5448	1.4933	1.8795	7.6467	1.5448	1.622	1.3646	2.5232	1.6478	1.4676	1.5448	2.2142	1.4676	1.4418	1.8537	1.3388	109.577
N159-E01	319.23	0.7048	0.4824	0.8928	0.5137	0.4918	6.1522	0.6108	1.2248	0.9147	0.9836	0.8928	0.4667	0.473	0.5075	0.9523	0.4573	0.4573	1.9327	0.9711	4.965	0.5294	0.4542	0.4417	0.4949	2.1614	0.686	33.2921	0.4887	5.6447	0.4887	1.2969	0.5795	0.5826	0.4667	5.8327	0.8771	0.5012	0.4573	1.4879	0.6954	0.5357	0.5858	1.8074	0.5732	0.5952	1.4347	0.5545	357.458
N159-E02	306.1	0.5162	0.4802	1.0356	0.5194	0.4345	2.0418	0.477	1.0193	0.5456	0.722	0.8135	0.5717	0.4508	0.4116	0.7155	0.3724	0.4018	1.444	0.6534	1.8719	0.4933	0.3463	0.392	0.4116	1.2414	0.5978	29.5033	0.6403	5.5015	0.4574	1.5354	0.5488	0.5848	0.428	3.525	0.6142	0.3463	0.4508	0.6762	0.5652	0.4998	0.5815	1.738	0.5162	0.4933	0.7841	0.477	408.104
N159-E03	210.02	0.6999	0.5952	1.1189	0.7142	0.5619	2.9759	0.7714	1.2285	0.8904	0.8618	1.1951	0.6571	0.7333	0.6571	0.9951	0.6476	0.6333	1.576	1.0094	2.4379	0.6571	0.5952	0.619	0.5619	1.6094	0.7523	31.8019	0.7904	5.8471	0.7428	1.5713	0.6904	0.7428	0.5619	2.9807	0.7904	0.6714	0.6666	0.9285	0.7714	0.738	0.7952	2.3188	0.7571	0.6857	1.1332	0.6999	393.002
N159-E04	127.41	1.0125	1.0753	1.3343	0.9968	0.8948	2.5273	1.0282	1.2715	1.3892	1.1695	1.3029	0.8791	1.0282	0.8712	1.0753	0.9262	0.8948	1.6639	1.1302	2.6686	0.9811	1.0125	0.9732	0.9262	1.5933	1.0517	27.5649	1.0125	5.2351	0.9576	1.6404	1.0439	1.1773	1.0439	3.8538	1.1381	0.9732	1.0831	1.1381	0.9732	0.9262	1.2166	2.2212	1.1459	1.1773	1.3578	1.1459	320.332
N159-E05	187.31	0.6887	2.8616	1.0357	0.7581	0.6246	1.7031	1.575	1.276	0.8862	0.9503	1.2226	0.6994	0.8275	0.7848	1.0678	0.8062	0.7101	1.4575	1.0731	3.4062	0.7261	0.6674	2.0021	0.6834	1.607	0.8596	18.8888	0.7154	3.6785	0.6887	1.1585	0.7741	0.7635	0.6246	4.9331	0.8542	0.6834	0.6994	1.2066	0.7741	0.8275	0.7368	1.5589	0.7688	0.8382	0.9717	0.7207	255.405
N159-E06	234.47	0.772	0.6483	1.062	0.5928	0.6696	4.2692	0.6312	1.352	1.0108	0.9383	1.0705	0.6696	0.58	0.644	1.062	0.5672	0.5459	1.8553	0.9596	4.0176	0.6525	0.5758	0.6184	0.5672	1.8425	0.7762	33.1858	0.5758	5.8814	0.6014	1.4245	0.5843	0.6739	0.5417	5.2417	0.8701	0.6184	0.6142	1.2795	0.8914	0.708	0.7762	2.2178	0.7123	0.7336	1.4586	0.6995	378.376
N159-E07	154.71	1.0859	0.8144	1.2734	0.808	0.9049	13.5224	1.1764	0.9631	1.2992	1.2798	1.1635	0.8403	0.9114	0.8274	1.9456	0.8985	1.0342	1.3639	1.4156	4.6217	0.976	0.8209	0.9114	0.8274	1.8745	0.9308	26.3855	0.8338	5.0612	0.9308	1.4867	0.8338	0.8855	0.8597	9.0106	1.338	0.8532	0.7433	1.5061	0.9954	0.9696	0.8791	1.9004	0.9049	0.8855	1.2605	0.8791	275.044
N159-E08	228.45	0.6872	0.766	0.9805	0.6216	0.6697	17.5927	1.2038	0.9805	0.8142	0.998	1.1775	0.5122	0.6391	0.5472	0.8667	0.5603	0.7792	1.3176	0.7923	2.9766	0.626	0.6829	0.6435	0.5165	1.3263	0.8054	27.9365	0.6522	4.9421	0.7398	1.4839	0.7004	0.7266	0.5034	3.5194	0.9149	0.6347	0.6785	0.8667	0.8186	0.6347	0.731	1.659	0.6216	0.6479	1.0768	0.6741	375.138
N159-E09	134.71	1.4698	0.9576	1.3659	1.017	1.1803	17.6301	1.4772	1.2248	1.351	1.2916	1.1209	0.965	0.9502	0.8165	2.1601	0.9205	0.9279	1.4327	1.2991	4.0382	0.8982	1.0392	0.8834	0.9427	2.3012	1.2397	27.54	0.9205	4.7954	0.9724	1.5663	1.0689	1.1432	1.0096	7.8315	1.21	0.9056	1.1803	1.5069	1.0021	1.1357	0.9427	1.8706	0.9279	0.9279	1.7148	1.3213	303.37
N159-E10	291.41	0.6692	0.5765	1.1359	0.5971	0.5147	2.5737	0.5628	0.9814	0.8339	0.7241	1.1187	0.5045	0.4255	0.429	1.1221	0.5491	0.5456	1.3624	0.7756	3.7817	0.5559	0.453	0.4701	0.3946	1.8325	0.755	36.9484	0.6554	6.726	0.6383	1.6678	0.5937	0.676	0.5456	5.3019	0.8099	0.5422	0.6074	0.9334	0.6589	0.6863	0.6795	2.0796	0.5559	0.525	0.9368	0.5388	406.258
N159-E11	417.25	0.7214	0.3907	0.9371	0.4242	0.417	2.3871	0.3619	0.9874	0.7334	0.6735	0.7022	0.3403	0.3164	0.4002	0.8268	0.3427	0.441	1.4859	0.719	3.2475	0.4602	0.3403	0.3427	0.3403	1.4859	0.6926	29.2799	0.5009	5.4332	0.4554	1.3996	0.5009	0.5297	0.3523	5.1624	0.6471	0.3427	0.4098	0.9083	0.5201	0.429	0.5345	1.7376	0.4961	0.4218	1.1456	0.4194	347.788
N159-E12	296.16	0.4558	4.2241	0.888	0.4964	0.5267	1.2527	1.6984	1.9618	1.3202	0.807	0.8914	0.4828	0.5166	0.5706	1.8233	0.6719	0.6314	2.6709	1.4553	10.3424	0.8543	0.4727	2.3737	0.5977	3.1537	0.8678	36.1226	0.5977	5.9664	0.5977	1.3506	0.5909	0.6348	0.6821	12.5744	1.4958	0.7293	0.5403	2.8296	1.0737	0.7901	0.6483	2.0867	0.6449	0.8982	2.3366	0.6517	283.494
N159-F01	361.67	0.882	0.5392	0.7797	0.3982	0.4507	2.4912	0.4839	1.6479	0.9871	0.6857	0.6802	0.4479	0.4009	0.4756	1.1806	0.4341	0.5032	2.4166	1.0092	4.3244	0.5281	0.3705	0.4507	0.3954	1.9134	0.6055	24.3871	0.4313	4.3272	0.4424	1.0783	0.5253	0.5226	0.423	5.5521	0.8461	0.4147	0.4009	1.2276	0.6387	0.5668	0.5005	1.5263	0.4949	0.553	1.2415	0.3843	268.543
N159-F02	329.53	0.9043	0.4825	0.6433	0.4339	0.5523	1.5355	0.4704	1.8724	1.0743	0.6039	0.5644	0.4218	0.3672	0.5857	0.9347	0.4552	0.5189	2.8647	0.9134	3.1894	0.4764	0.4248	0.4582	0.4734	1.4657	0.5857	17.9012	0.5735	3.4079	0.4673	0.9923	0.5493	0.5402	0.5128	4.6794	0.8406	0.3854	0.4188	0.9529	0.5917	0.522	0.4946	1.1228	0.5007	0.6039	1.0894	0.4946	220.601
N159-F03	293.58	0.7426	0.545	0.9401	0.4939	0.4769	2.3333	0.3985	1.2331	0.5791	0.6438	0.7255	0.4564	0.5007	0.6131	0.8379	0.545	0.5518	1.853	0.7971	2.2788	0.5791	0.4053	0.5041	0.4326	1.2433	0.5859	24.4023	0.5825	4.6189	0.453	1.2773	0.5552	0.5518	0.4973	4.2374	0.6676	0.4837	0.4973	0.7153	0.562	0.5041	0.6233	1.5158	0.5654	0.5416	0.8311	0.4735	345.094
N159-F04	246.89	0.7534	0.4698	1.0004	0.5063	0.6238	3.4428	0.6359	1.5959	0.721	0.9559	1.0004	0.5022	0.721	0.6076	1.7903	0.6967	0.7007	2.6085	2.329	2.167	0.5873	0.5266	0.5671	0.5914	2.2156	0.7898	25.0962	0.6643	4.6053	0.5914	1.446	0.6197	0.8668	0.6643	0.8587	0.8749	0.559	0.5549	1.3285	0.7858	0.7048	0.721	2.1508	0.644	0.725	1.7133	0.6643	327.827
N159-F05	287.02	0.8675	0.5191	0.9651	0.662	0.5749	3.4457	0.5609	1.2926	0.9302	0.8153	1.0034	0.5261	0.5574	0.5156	0.9964	0.5749	0.5818	2.1218	1.1393	3.052	0.5993	0.5505	0.5226	0.4982	1.519	0.6898	24.3187	0.6898	4.4631	0.5853	1.2194	0.6236	0.662	0.5818	3.1949	0.8153	0.4564	0.4599	1.0766	0.6968	0.5888	0.5784	1.3901	0.6236	0.5609	1.0069	0.547	300.022
N159-F06	138.76	0.9801	0.8936	1.3621	1.0378	0.9801	11.2568	1.1675	1.3044	1.29	1.3693	1.326	1.0738	0.9297	1.0161	1.254	0.9657	1.0522	1.5566	1.3332	3.3007	1.0233	0.8648	0.8792	0.7927	1.9242	1.3044	29.014	1.1314	5.4482	1.0089	1.8809	0.9945	1.081	1.0233	4.0501	1.0738	0.872	0.9152	1.254	1.0378	1.0161	1.3404	2.2124	0.9657	1.0738	1.4846	0.9513	348.637
N159-F07	253.04	0.6758	0.5335	1.0749	0.5968	0.5375	4.8372	0.7351	1.3713	1.1263	0.9603	1.2212	0.5059	0.5809	0.6797	1.0987	0.6047	0.6047	2.0116	1.1935	4.3511	0.6956	0.5019	0.5572	0.5651	1.9839	0.7232	35.9315	0.5968	6.09	0.5888	1.478	0.7548	0.7114	0.5454	4.5487	1.0868	0.573	0.5138	1.3555	0.7509	0.7153	0.6047	1.9681	0.6323	0.6797	1.3042	0.6086	374.021
N159-F08	333.91	0.6259	0.545	1.0122	0.563	0.6079	4.8036	0.6648	1.6022	1.0092	0.9344	1.1051	0.4852	0.4552	0.4792	1.0751	0.5421	0.4971	2.1742	1.171	4.8186	0.554	0.4552	0.4642	0.4941	1.9436	0.7367	33.3588	0.6169	6.1213	0.5091	1.4315	0.596	0.545	0.4402	5.5613	0.7337	0.5001	0.4732	1.144	0.7158	0.599	0.6738	1.9885	0.4792	0.6469	1.153	0.5301	367.483
N159-F09	246.14	0.5403	2.2751	0.8207	0.6257	0.6704	0.8735	1.0726	0.646	0.646	8.2189	1.8282	0.7232	1.1416	0.6744	0.7354	0.585	0.7272	0.6785	1.3082	1.5032	1.3895	8.5764	1.4098	0.5241	1.0848	0.7029	19.6393	0.6216	3.7824	0.4875	1.0848	0.5078	0.8288	0.5363	2.2426	0.9751	0.6704	0.5891	0.6825	0.6744	0.78	0.7272	1.6698	0.7272	0.8085	0.845	0.65	313.156
N159-F10	143.57	1.6577	1.0448	1.5045	0.8846	1.1353	7.0695	1.198	1.0935	1.1562	1.1492	1.0657	0.9681	1.0726	0.9264	1.9224	1.0796	1.1144	1.3094	1.1005	2.8626	0.9751	0.8637	1.003	1.0517	1.7273	1.003	35.7656	1.0239	7.2924	0.8985	1.985	1.0239	1.2467	1.1841	6.3312	1.1632	0.8706	1.0587	1.5323	0.9821	0.996	1.0796	2.2915	0.989	0.7731	1.4	1.003	377.659
N159-F11	290.8	0.5089	1.1382	0.6774	0.4367	0.4436	0.9491	0.9628	0.9285	0.6258	0.7393	0.6362	0.4298	0.564	0.5949	0.8184	0.5192	0.4814	1.1829	0.9216	0.9491	0.4161	0.4745	0.9628	0.4539	1.0282	0.588	15.77	0.5605	2.9229	0.5708	1.0282	0.4986	0.5949	0.5364	0.815	0.674	0.4333	0.4333	0.643	0.6018	0.447	0.5021	1.1073	0.423	0.5708	0.87	0.5296	260.597
N159-F12(pET28)	257.64	0.5861	2.9498	0.7763	0.5861	0.5317	1.4322	1.2459	1.1916	0.59	0.7957	0.9432	0.5046	0.5589	0.6443	1.1256	0.59	0.7181	1.6224	1.048	2.3288	0.5744	0.5356	1.8747	0.5977	1.5797	0.7996	22.9854	0.5938	4.3277	0.6016	1.0945	0.5512	0.7607	0.5783	3.893	0.9393	0.4891	0.5201	1.0053	0.6598	0.6171	0.5977	1.4245	0.5589	0.8306	1.2032	0.5123	295.682
N159-G01	230.15	0.7343	0.6431	1.1645	0.6909	0.6213	9.6373	0.8038	2.0856	0.8342	1.121	1.1036	0.5953	0.5996	0.6952	0.869	0.6474	0.6691	3.1502	1.0906	3.5021	0.6909	0.5518	0.5909	0.6127	1.9509	0.8299	27.6432	0.6561	4.9403	0.5735	1.4208	0.6865	0.7082	0.6387	4.4754	0.8299	0.5779	0.8647	0.9429	0.7951	0.6083	0.982	1.8032	0.6431	0.6691	1.3079	0.6344	353.6
N159-G02	372.24	0.8839	0.3036	0.865	0.4916	0.548	2.2942	0.3761	0.8221	0.4701	0.7415	0.7334	0.4433	0.4003	0.3922	0.6233	0.4003	0.3869	1.1847	0.6045	1.4883	0.4943	0.3842	0.3922	0.3251	1.088	0.5158	21.8921	0.5346	4.336	0.4755	1.2197	0.454	0.54	0.3922	1.7408	0.4809	0.3412	0.591	0.5937	0.4889	0.4352	0.5668	1.3701	0.4648	0.3707	0.6206	0.368	342.617
N159-G03	162.48	0.9663	0.8555	1.4587	0.8555	0.9601	11.1646	1.1448	1.5818	1.0648	1.4402	1.2556	1.0524	1.0955	0.837	1.2679	0.9786	0.954	2.2588	1.1017	3.7605	0.917	1.0094	0.8493	0.7324	1.6556	1.0586	29.5732	0.954	5.5884	0.9601	2.0434	0.9294	1.034	0.9109	5.2746	1.0832	0.8863	0.9109	1.2802	0.9294	0.8001	0.8617	2.3511	0.8124	0.8924	1.2556	0.8309	363.113
N159-G04	153.15	0.888	0.9664	1.4561	0.8227	0.9076	5.7264	1.1753	2.0241	1.1492	1.1557	1.3124	0.9337	0.8358	0.9468	1.6389	0.9207	1.0512	2.1939	1.5279	6.0528	1.0055	0.8292	0.7444	0.8815	2.4486	1.4104	28.1944	0.9076	4.6164	0.8815	1.6389	1.0186	1.0382	0.9598	7.6656	1.2733	0.986	0.999	2.1809	1.2667	1.0904	1.1492	2.4616	1.1623	1.1361	2.2592	0.999	250.929
N159-G05	273.66	0.5774	0.5006	1.056	0.6175	0.4458	6.5117	0.6614	0.8405	0.5116	0.9026	1.1328	0.5152	0.6175	0.5372	0.771	0.5518	0.4933	1.0962	0.8003	2.2473	0.5262	0.4677	0.4641	0.5372	1.4105	0.6285	30.9176	0.7454	5.5616	0.5554	1.4215	0.5225	0.6358	0.5737	2.6675	0.5481	0.4787	0.5372	0.8258	0.5774	0.6066	0.6212	1.8088	0.592	0.592	0.7637	0.4823	397.208
N159-G06	326.63	0.5266	0.4439	0.7042	0.4868	0.4715	1.2155	0.447	1.2828	0.6399	0.6307	0.6001	0.4347	0.5235	0.5021	0.8205	0.5205	0.6215	1.5982	0.7654	2.3789	0.4929	0.4286	0.4776	0.4531	1.2369	0.5664	21.0547	0.5572	3.8148	0.4899	1.0991	0.5235	0.7072	0.4684	2.7065	0.6307	0.4347	0.5297	0.796	0.5082	0.4286	0.548	1.243	0.4837	0.5388	0.9491	0.4807	280.807
N159-G07	300.41	0.6558	0.4461	0.7623	0.5659	0.5592	2.2502	0.506	0.6458	0.4394	0.6358	0.8155	0.4927	0.4461	0.4594	0.8355	0.4893	0.5026	0.8388	0.7789	0.7823	0.5426	0.3961	0.5093	0.4394	0.9387	0.5359	13.6845	0.5226	2.6763	0.5958	0.982	0.5259	0.6092	0.5659	0.5126	0.506	0.4128	0.5426	0.5659	0.476	0.4261	0.506	1.1717	0.5026	0.4494	0.7024	0.456	243.222
N159-G08	279.27	0.9382	0.4798	0.9095	0.5479	0.598	4.1036	0.5872	1.1136	0.7663	0.8665	0.9919	0.4655	0.5013	0.53	0.9955	0.5837	0.5514	1.5361	0.9847	2.7894	0.5658	0.4691	0.512	0.5228	1.5182	0.7842	24.1343	0.6159	4.4294	0.6982	1.3714	0.5944	0.5729	0.5693	3.0723	0.6768	0.555	0.5693	0.9238	0.6768	0.641	0.5944	1.6901	0.6087	0.5944	1.0671	0.5586	307.609
N159-G09	311.9	0.7759	0.4649	0.9458	0.5034	0.5066	1.8628	0.4937	1.2472	0.7342	0.6797	0.7053	0.5194	0.4713	0.4681	0.8657	0.5002	0.4937	1.68	0.9522	2.8759	0.5162	0.4649	0.42	0.3911	1.3466	0.6092	22.5231	0.5194	4.0109	0.4873	1.1895	0.4585	0.5034	0.529	4.3058	0.6925	0.5675	0.4617	0.8657	0.6733	0.5611	0.6188	1.4428	0.4841	0.4873	0.9586	0.4457	290.755
N159-G10	314.7	0.5942	0.394	0.8166	0.4894	0.5688	1.4458	0.4544	0.8643	0.6228	0.6705	0.68	0.4258	0.4798	0.4735	0.6864	0.448	0.4099	1.1408	0.6609	1.5475	0.4639	0.429	0.3908	0.3877	0.931	0.5847	18.6686	0.5307	3.5399	0.4671	1.1122	0.6006	0.5021	0.4608	2.1227	0.4576	0.5052	0.4036	0.572	0.4512	0.4576	0.6196	1.1281	0.518	0.4703	0.7976	0.4894	295.144
N159-G11	208.77	0.6275	0.8047	1.1927	0.6179	0.6562	2.5338	0.6802	2.3183	1.801	0.8718	0.9915	0.7328	0.6131	0.7903	4.33	0.843	0.6802	3.4822	2.0644	6.131	0.7999	0.57	0.6179	0.6227	2.6584	0.8478	37.2939	0.8143	6.2604	0.7233	1.777	0.8334	0.8047	0.6227	7.6494	0.9484	0.6945	0.6802	2.8787	1.1831	0.8909	0.8478	2.2512	0.8574	0.7472	1.7435	1.0202	275.628
N159-G12(WT)	335.19	0.5997	0.5698	1.0591	0.5221	0.5012	2.2137	0.6713	1.9303	1.0502	0.9517	0.7846	0.4475	0.5072	0.6593	1.5335	0.531	0.531	2.8193	1.2113	3.7352	0.6146	0.3789	0.4982	0.4266	1.5723	0.7518	26.7941	0.5489	5.1106	0.5072	1.3157	0.5579	0.5788	0.4475	6.0295	0.7518	0.4207	0.4923	1.0352	0.6265	0.534	0.5579	1.5156	0.5161	0.5579	1.0591	0.5191	316.86
N159-H01	390.65	0.4761	0.3379	0.8243	0.3942	0.3533	2.1247	0.4429	1.4028	0.6809	0.7142	0.7065	0.4454	0.4454	0.5094	0.7449	0.4045	0.5427	1.9455	0.7142	2.9489	0.5273	0.4633	0.3814	0.3993	1.3311	0.6656	26.7018	0.5094	5.3373	0.4992	1.3567	0.5862	0.4659	0.4249	4.0804	0.6656	0.4429	0.4173	0.8217	0.512	0.4941	0.599	1.5641	0.4787	0.4685	0.9523	0.4045	347.42
N159-H02	131.14	1.2125	0.9608	1.5022	0.9303	0.9608	1.1667	0.9608	1.2201	1.0905	1.3497	1.6319	0.9303	0.9532	1.0523	1.7386	0.9532	1.2887	1.3421	1.7234	1.6243	1.1515	1.5632	1.2964	0.999	1.7615	1.0981	22.6404	1.0447	5.2617	1.2277	2.1504	1.0676	1.0828	1.1133	1.5327	1.121	1.1743	1.2201	1.3574	1.0981	1.2582	1.0142	2.3258	1.2277	1.3421	1.7081	1.0828	353.08
N159-H03	182.36	0.9158	0.7293	1.0419	0.68	0.8335	5.2368	0.7567	2.0399	0.9048	1.667	1.2886	0.7567	0.7513	0.85	1.179	0.8225	0.9377	2.665	1.1351	4.9188	0.8116	0.7403	0.8609	0.7622	2.3689	1.0803	27.8841	0.7622	4.7543	0.7787	1.6177	0.828	0.839	0.8171	4.9352	1.0309	0.8554	0.8171	1.3161	0.8774	0.8829	0.9377	1.9576	0.7074	0.8225	1.3764	0.658	317.04
N159-H04	272.17	0.8818	0.496	1.0067	0.5915	0.5952	5.0079	0.6981	1.319	0.6136	1.0031	1.0508	0.4666	0.4629	0.5989	0.8157	0.6173	0.6577	2.1016	0.8451	2.458	0.6393	0.5438	0.6099	0.4593	1.4035	0.6908	26.9099	0.5511	5.3313	0.5695	1.455	0.5842	0.5401	0.5658	2.7299	0.7018	0.4593	0.507	0.7716	0.6136	0.5034	0.6467	1.7012	0.6209	0.4666	0.8598	0.496	351.989
N159-H05	229.86	0.9049	0.6961	0.9919	0.6178	0.6308	5.3293	0.8875	1.5444	0.6439	0.9571	1.266	0.596	0.5917	0.6134	1.4966	0.6743	0.7874	2.2013	1.5531	1.4095	0.7091	0.6395	0.7961	0.6482	1.6314	0.9397	22.2612	0.6395	4.5114	0.6656	1.44	0.7004	0.6743	0.5917	0.7831	0.9049	0.67	0.6352	1.1268	0.6482	0.6917	0.8092	1.6271	0.6874	0.6482	1.0224	0.5525	309.203
N159-H06	259.25	1.1611	0.6866	0.8525	0.5015	0.621	4.0733	0.7483	1.2151	0.7406	0.7792	0.9605	0.5825	0.567	0.8216	0.999	0.6943	0.648	1.8168	0.7213	2.4957	0.6635	0.5747	0.5516	0.5555	1.4735	0.702	20.98	0.567	4.0541	0.5747	1.3539	0.621	0.5709	0.5207	2.5458	0.6982	0.5863	0.5979	1.1109	0.7522	0.5439	0.5863	1.3269	0.5207	0.5439	0.9373	0.5632	274.222
N159-H07	224.47	0.7796	0.6282	1.1004	0.7262	0.5836	6.6201	0.7841	1.0781	0.9311	1.1583	1.234	0.695	0.5747	0.6014	0.891	0.6816	0.7529	1.9112	1.0558	3.613	0.597	0.4811	0.5435	0.6371	1.5414	0.8821	31.9823	0.6059	5.8939	0.6549	1.5281	0.6371	0.6994	0.6059	5.0698	0.9133	0.695	0.744	1.2385	0.8865	0.7841	0.8821	2.0137	0.6326	0.6282	1.136	0.744	377.087
N159-H08	307.56	0.7251	0.4487	0.7543	0.4422	0.465	2.6336	0.608	0.9429	0.686	0.6828	0.621	0.478	0.4552	0.504	0.8941	0.5365	0.5462	1.4111	0.8714	1.9281	0.517	0.4324	0.543	0.5105	1.138	0.517	14.6215	0.5983	2.8645	0.4975	0.8876	0.5267	0.5625	0.4519	2.393	0.543	0.4422	0.5137	0.7348	0.5625	0.5495	0.5332	1.0339	0.504	0.5137	0.7641	0.478	205.843
N159-H09	317.43	0.5608	0.586	0.7907	0.5198	0.5923	2.7691	0.5387	0.6584	0.5545	0.7277	0.9041	0.4347	0.4284	0.4725	0.8789	0.4852	0.5009	1.0617	0.6364	2.369	0.5135	0.6301	0.5167	0.4473	1.3798	0.6805	23.1644	0.608	4.2277	0.5167	1.3515	0.5765	0.5734	0.4536	3.0905	0.5891	0.4631	0.4473	0.8002	0.5356	0.4757	0.6301	1.6161	0.4568	0.482	0.8569	0.4064	323.999
N159-H10	191.52	1.2636	0.9607	1.0286	0.6997	0.7153	6.2501	1.0338	1.7596	1.2323	1.1801	1.0182	0.6736	0.6579	0.8093	2.8196	0.8407	0.8145	2.5951	1.2688	4.2085	0.825	0.7414	0.7884	0.7206	1.7753	0.7258	16.9959	0.6997	3.1746	0.7414	0.9764	0.7728	0.7206	0.7623	4.5844	0.9294	0.7571	0.7884	1.5925	0.9555	0.8668	0.7414	1.4098	0.7623	0.7258	1.4046	0.9138	148.352
N159-H11	325.94	0.632	0.4848	0.9726	0.4817	0.4725	2.3256	0.5615	1.3131	0.5522	0.8529	0.7333	0.494	0.4265	0.5737	0.6228	0.4265	0.4418	1.8654	0.7762	2.6385	0.5338	0.408	0.4848	0.4449	1.3591	0.6719	24.845	0.6167	4.691	0.4755	1.3469	0.5461	0.497	0.4418	3.7277	0.6811	0.4541	0.494	0.7271	0.5185	0.4694	0.5338	1.4788	0.5308	0.4817	0.8836	0.4909	342.888
N159-H12	230.26	0.6514	0.7253	1.2377	0.6297	0.5863	3.1008	0.608	2.1931	0.7687	0.8903	10.8441	1.0944	0.5776	0.7209	1.3897	0.6471	0.6862	3.2398	78.9485	4.9769	0.6601	0.5602	0.608	0.5081	1.1899	0.76	28.2936	0.6731	5.5805	0.5993	1.5765	0.7557	0.8555	0.6384	2.0846	1.6373	0.8859	0.6341	0.7383	0.5559	0.7643	0.9424	1.7502	0.6905	0.7035	2.8011	0.7122	389.435
[truncated: 154 more columns]

[truncated: 5 more sheets: I204, T206, L185, D205, P207]
